# Supplementary material
Source: MDPI journal article supplement (https://www.mdpi.com/2073-8994/15/4/918)
Supplement: s1 [file s1]

**Table S3.** Atomic anisotropic displacement parameters for BaBi<sub>1.90</sub>Eu<sub>0.10</sub>B<sub>4</sub>O<sub>10</sub>, BaBi<sub>1.70</sub>Eu<sub>0.30</sub>B<sub>4</sub>O<sub>10</sub> and BaBi<sub>1.60</sub>Eu<sub>0.40</sub>B<sub>4</sub>O<sub>10</sub>.

| <b>BaBi<sub>1.56</sub>Eu<sub>0.44</sub>B<sub>4</sub>O<sub>10</sub></b> |              |              |              |               |              |               |
|------------------------------------------------------------------------|--------------|--------------|--------------|---------------|--------------|---------------|
|                                                                        | $U^{11}$     | $U^{22}$     | $U^{33}$     | $U^{12}$      | $U^{13}$     | $U^{23}$      |
| Bi1                                                                    | 0.01067 (14) | 0.01175 (15) | 0.01586 (17) | 0.00094 (9)   | 0.00461 (11) | −0.00087 (9)  |
| Eu1'                                                                   | 0.01067 (14) | 0.01175 (15) | 0.01586 (17) | 0.00094 (9)   | 0.00461 (11) | −0.00087 (9)  |
| Bi2                                                                    | 0.01023 (13) | 0.01095 (14) | 0.01596 (16) | −0.00134 (9)  | 0.00461 (10) | 0.00036 (9)   |
| Eu2'                                                                   | 0.01023 (13) | 0.01095 (14) | 0.01596 (16) | −0.00134 (9)  | 0.00461 (10) | 0.00036 (9)   |
| Ba1                                                                    | 0.0115 (2)   | 0.0100 (2)   | 0.0157 (2)   | −0.00048 (13) | 0.00515 (15) | −0.00084 (13) |
| O1                                                                     | 0.012 (2)    | 0.010 (2)    | 0.020 (3)    | 0.0019 (17)   | 0.005 (2)    | −0.0010 (18)  |
| O2                                                                     | 0.014 (2)    | 0.013 (3)    | 0.053 (4)    | −0.0021 (19)  | 0.012 (3)    | −0.009 (2)    |
| O3                                                                     | 0.023 (3)    | 0.016 (3)    | 0.022 (3)    | 0.0125 (19)   | 0.010 (2)    | 0.010 (2)     |
| O4                                                                     | 0.011 (2)    | 0.015 (2)    | 0.018 (3)    | −0.0013 (17)  | 0.003 (2)    | 0.0047 (18)   |
| O5                                                                     | 0.014 (2)    | 0.018 (3)    | 0.025 (3)    | −0.0061 (18)  | 0.011 (2)    | 0.001 (2)     |
| O6                                                                     | 0.012 (2)    | 0.029 (3)    | 0.022 (3)    | −0.001 (2)    | 0.007 (2)    | −0.008 (2)    |
| O7                                                                     | 0.012 (2)    | 0.013 (2)    | 0.020 (3)    | −0.0039 (17)  | 0.009 (2)    | −0.0023 (18)  |
| O8                                                                     | 0.008 (2)    | 0.012 (2)    | 0.018 (3)    | −0.0025 (16)  | 0.0037 (19)  | 0.0029 (18)   |
| O9                                                                     | 0.011 (2)    | 0.009 (2)    | 0.029 (3)    | −0.0015 (17)  | 0.007 (2)    | 0.0001 (19)   |
| O10                                                                    | 0.024 (3)    | 0.018 (2)    | 0.016 (3)    | 0.013 (2)     | 0.013 (2)    | 0.0051 (19)   |
| B1                                                                     | 0.016 (4)    | 0.015 (4)    | 0.012 (4)    | −0.001 (3)    | 0.001 (3)    | 0.000 (3)     |
| B2                                                                     | 0.007 (3)    | 0.012 (3)    | 0.014 (4)    | 0.006 (2)     | 0.004 (3)    | 0.004 (3)     |
| B3                                                                     | 0.016 (4)    | 0.023 (4)    | 0.037 (6)    | −0.004 (3)    | 0.013 (4)    | −0.011 (4)    |
| B4                                                                     | 0.005 (3)    | 0.011 (3)    | 0.017 (4)    | −0.002 (2)    | 0.002 (3)    | 0.001 (3)     |
| <b>BaBi<sub>1.67</sub>Eu<sub>0.33</sub>B<sub>4</sub>O<sub>10</sub></b> |              |              |              |               |              |               |
|                                                                        | $U^{11}$     | $U^{22}$     | $U^{33}$     | $U^{12}$      | $U^{13}$     | $U^{23}$      |
| Bi1                                                                    | 0.0125 (2)   | 0.0119 (2)   | 0.0135 (2)   | 0.00093 (13)  | 0.00371 (15) | −0.00079 (13) |
| Eu1'                                                                   | 0.0125 (2)   | 0.0119 (2)   | 0.0135 (2)   | 0.00093 (13)  | 0.00371 (15) | −0.00079 (13) |
| Bi2                                                                    | 0.0121 (2)   | 0.0119 (2)   | 0.0143 (2)   | −0.00093 (13) | 0.00321 (14) | 0.00031 (13)  |
| Eu2'                                                                   | 0.0121 (2)   | 0.0119 (2)   | 0.0143 (2)   | −0.00093 (13) | 0.00321 (14) | 0.00031 (13)  |
| Ba1                                                                    | 0.0140 (3)   | 0.0109 (3)   | 0.0139 (3)   | −0.00065 (19) | 0.0041 (2)   | −0.00064 (19) |
| O1                                                                     | 0.008 (3)    | 0.010 (3)    | 0.013 (3)    | 0.003 (2)     | 0.000 (3)    | 0.004 (2)     |
| O2                                                                     | 0.018 (4)    | 0.015 (4)    | 0.030 (4)    | 0.001 (3)     | 0.006 (3)    | 0.007 (3)     |
| O3                                                                     | 0.026 (4)    | 0.012 (3)    | 0.018 (4)    | 0.011 (3)     | 0.009 (3)    | 0.006 (3)     |
| O4                                                                     | 0.007 (3)    | 0.015 (4)    | 0.017 (4)    | 0.000 (2)     | 0.004 (3)    | 0.003 (2)     |
| O5                                                                     | 0.011 (3)    | 0.015 (4)    | 0.021 (4)    | −0.004 (3)    | 0.005 (3)    | −0.007 (3)    |
| O6                                                                     | 0.011 (4)    | 0.026 (4)    | 0.018 (4)    | 0.003 (3)     | 0.008 (3)    | −0.002 (3)    |
| O7                                                                     | 0.007 (3)    | 0.013 (4)    | 0.022 (4)    | −0.006 (2)    | 0.000 (3)    | −0.002 (3)    |
| O8                                                                     | 0.015 (4)    | 0.011 (3)    | 0.017 (4)    | −0.004 (3)    | 0.001 (3)    | 0.003 (3)     |
| O9                                                                     | 0.009 (4)    | 0.016 (4)    | 0.031 (4)    | −0.001 (3)    | 0.006 (3)    | 0.001 (3)     |
| O10                                                                    | 0.018 (4)    | 0.013 (3)    | 0.017 (4)    | 0.005 (3)     | 0.008 (3)    | 0.001 (3)     |
| B1                                                                     | 0.013 (5)    | 0.007 (5)    | 0.010 (5)    | −0.005 (4)    | 0.001 (4)    | 0.001 (4)     |
| B2                                                                     | 0.013 (5)    | 0.011 (4)    | 0.015 (5)    | 0.0035 (18)   | 0.0045 (17)  | −0.004 (18)   |
| B3                                                                     | 0.028 (7)    | 0.016 (6)    | 0.018 (6)    | −0.004 (5)    | 0.008 (5)    | −0.006 (4)    |
| B4                                                                     | 0.006 (5)    | 0.016 (5)    | 0.011 (5)    | −0.004 (4)    | 0.003 (4)    | −0.006 (4)    |
| <b>BaBi<sub>1.94</sub>Eu<sub>0.06</sub>B<sub>4</sub>O<sub>10</sub></b> |              |              |              |               |              |               |
|                                                                        | $U^{11}$     | $U^{22}$     | $U^{33}$     | $U^{12}$      | $U^{13}$     | $U^{23}$      |

|      |              |              |              |               |              |               |
|------|--------------|--------------|--------------|---------------|--------------|---------------|
| Bi1  | 0.01373 (18) | 0.01207 (17) | 0.01409 (17) | 0.00120 (11)  | 0.00566 (12) | −0.00055 (11) |
| Eu1' | 0.01373 (18) | 0.01207 (17) | 0.01409 (17) | 0.00120 (11)  | 0.00566 (12) | −0.00055 (11) |
| Bi2  | 0.01276 (16) | 0.01228 (15) | 0.01521 (16) | −0.00061 (11) | 0.00459 (12) | 0.00015 (11)  |
| Ba1  | 0.0138 (2)   | 0.0104 (2)   | 0.0130 (2)   | −0.00098 (16) | 0.00535 (18) | −0.00050 (16) |
| O1   | 0.013 (3)    | 0.018 (3)    | 0.010 (3)    | 0.002 (2)     | 0.006 (2)    | 0.002 (2)     |
| O2   | 0.015 (3)    | 0.009 (3)    | 0.026 (3)    | 0.003 (2)     | 0.002 (3)    | 0.005 (2)     |
| O3   | 0.021 (3)    | 0.005 (2)    | 0.017 (3)    | 0.007 (2)     | 0.007 (3)    | 0.003 (2)     |
| O4   | 0.013 (3)    | 0.010 (3)    | 0.012 (3)    | −0.004 (2)    | 0.001 (2)    | 0.003 (2)     |
| O5   | 0.013 (3)    | 0.009 (3)    | 0.015 (3)    | −0.003 (2)    | 0.006 (2)    | −0.002 (2)    |
| O6   | 0.012 (3)    | 0.020 (3)    | 0.015 (3)    | 0.001 (2)     | 0.010 (2)    | −0.003 (2)    |
| O7   | 0.003 (3)    | 0.015 (3)    | 0.018 (3)    | −0.0020 (19)  | 0.004 (2)    | 0.000 (2)     |
| O8   | 0.015 (3)    | 0.010 (3)    | 0.016 (3)    | −0.001 (2)    | 0.005 (2)    | 0.002 (2)     |
| O9   | 0.008 (3)    | 0.017 (3)    | 0.020 (3)    | 0.001 (2)     | 0.006 (2)    | 0.005 (2)     |
| O10  | 0.014 (3)    | 0.016 (3)    | 0.013 (3)    | 0.004 (2)     | 0.006 (2)    | 0.002 (2)     |
| B1   | 0.011 (4)    | 0.011 (4)    | 0.013 (4)    | −0.001 (3)    | 0.003 (4)    | −0.002 (3)    |
| B3   | 0.014 (5)    | 0.016 (5)    | 0.030 (6)    | −0.010 (4)    | 0.011 (4)    | −0.010 (4)    |
| B4   | 0.008 (4)    | 0.017 (4)    | 0.005 (4)    | 0.006 (3)     | −0.001 (3)   | 0.001 (3)     |
