# Supplementary material
Source: MDPI journal article supplement (https://www.mdpi.com/2073-8994/15/4/918)
Supplement: s1 [file s1]

Archive with 10 entries (10 files):
- BaB17iEu03B4O10.cif
- BaBi16Eu04B4O10-checkcif.pdf
- BaBi16Eu04B4O10.cif
- BaBi17Eu03B4O10-checkcif.pdf
- BaBi19Eu01B4O10-checkcif.pdf
- BaBi19Eu01B4O10.cif
- Table S1.pdf
- Table S2.pdf
- Table S3.pdf
- Table S4.pdf
