# Supplementary material
Source: MDPI journal article supplement (https://www.mdpi.com/2073-8994/15/4/918)
Supplement: s1 [file s1 › BaB17iEu03B4O10.cif]

#=======================================================================
data_global
#=======================================================================

_audit_creation_method                   'Jana2006 Version : 25/10/2015'


# 1. PROCESSING SUMMARY (IUCr Office Use Only)

_journal_date_recd_electronic            ?
_journal_date_to_coeditor                ?
_journal_date_from_coeditor              ?
_journal_date_accepted                   ?
_journal_date_printers_first             ?
_journal_date_printers_final             ?
_journal_date_proofs_out                 ?
_journal_date_proofs_in                  ?
_journal_coeditor_name                   ?
_journal_coeditor_code                   ?
_journal_coeditor_notes
; ?
;
_journal_techeditor_code                 ?
_journal_paper_category                  ?
_journal_techeditor_notes
; ?
;
_journal_coden_ASTM                      ?
_journal_name_full                       'Acta Crystallographica Section C'
_journal_year                            ?
_journal_volume                          ?
_journal_issue                           ?
_journal_page_first                      ?
_journal_page_last                       ?
_journal_suppl_publ_number               ?
_journal_suppl_publ_pages                ?

#=======================================================================

# 2. SUBMISSION DETAILS

_publ_contact_author_name                ?
_publ_contact_author_address
; ?
;
_publ_contact_author_email               ?
_publ_contact_author_fax                 ?
_publ_contact_author_phone               ?

_publ_requested_journal                  'Acta Crystallographica Section C'
_publ_requested_category                 ?

_publ_contact_letter
; ?
;

#=======================================================================

# 3. TITLE AND AUTHOR LIST

_publ_section_title
; ?
;
_publ_section_title_footnote
; ?
;
loop_
 _publ_author_name
 _publ_author_footnote
 _publ_author_address
; ?      # name
;
; ?      # footnote
;
; ?      # address
;

#=======================================================================

# 4. TEXT

_publ_section_synopsis
; ?
;
_publ_section_abstract
; ?
;
_publ_section_comment
; ?
;
_publ_section_introduction
; ?
;
_publ_section_experimental
; ?
;
_publ_section_exptl_prep
; ?
;
_publ_section_exptl_refinement
; ?
;
_publ_section_exptl_solution
; ?
;
_publ_section_discussion
; ?
;
_publ_section_acknowledgements
; ?
;
_publ_section_references
;
Petricek, V., Dusek, M. & Palatinus L. (2014). Z. Kristallogr. 229(5), 345-352.

Palatinus L. & Chapuis G. (2007). J. Appl. Cryst. 40, 786-790.

# enable this reference if Diamond ver. 2 was used for visualization
#Brandenburg, K. (1999). DIAMOND. Version. 2.1c.
#Crystal Impact GbR, Bonn, Germany.

# enable this reference if Diamond ver. 3 was used for visualization
#Brandenburg, K. & Putz, H. (2005). DIAMOND Version 3.
#Crystal Impact GbR, Postfach 1251, D-53002 Bonn, Germany.

# enable this reference if SIR97 was used for solving of the structure
#Altomare, A., Burla, M. C., Camalli, M., Cascarano, G., Giacovazzo, C.,
#Guagliardi, A., Moliterni, A. G. G., Polidori, G., Spagna, R. (1997).
#SIR97. A Package for Crystal Structure Solution by Direct Methods
#and Refinement, Bari, Rome, Italy.

# use this reference if SIR2002 was used for solving of the structure
#Burla, M.C., Camalli, M., Carrozzini, B., Cascarano, G., Giacovazzo, C.,
#Polidori, G., Spagna, R.
#SIR2002: the program, J. Appl. Cryst, (2003). 36, 1103


# use this reference if SIR2011 was used for solving of the structure
#Burla, M.C., Caliandro, R., Camalli, M., Carrozzini, B., Cascarano,
#G.L., Giacovazzo, C., Mallamo. M., Mazzone, A., Polidori, G., Spagna, R.
#SIR2011: a new package for crystal structure determination and refinement,
#J.Appl.Cryst. (2012) 45, 357-361

# enable this reference if bond valences were calculated
#Brown, I. D. (1996). J. Appl. Cryst. 29, 479-480.

# enable this reference if Xshape wase used for crystal shape refinement
#Stoe & Cie (1998). X-SHAPE. Stoe & Cie, Darmstadt, Germany.


# enable this reference if Flack coefficient was refined
#Flack, H. D. (1983). Acta Cryst. A39, 876-881.
;
_publ_section_figure_captions
; ?
;
_publ_section_table_legends
; ?
;

#=======================================================================
data_I
#=======================================================================

# 5. CHEMICAL DATA

_chemical_name_systematic
; ?
;
_chemical_name_common                    ?
_chemical_formula_moiety                 ?
_chemical_formula_structural             ?
_chemical_formula_analytical             ?
_chemical_formula_iupac                  ?
_chemical_formula_sum                    'B4 Ba1 Bi1.673 Eu0.327 O10'
_chemical_formula_weight                 739.9
_chemical_melting_point                  ?
_chemical_compound_source                ?
_chemical_absolute_configuration         .

#=======================================================================

# 6. CRYSTAL DATA

_symmetry_cell_setting                   monoclinic
_symmetry_space_group_name_H-M           'P 1 21/c 1'
_symmetry_space_group_name_Hall          '-P 2ycb'
_symmetry_Int_Tables_number              14

loop_
 _space_group_symop_id
 _space_group_symop_operation_xyz
 1   x,y,z
 2   -x,y+1/2,-z+1/2
 3   -x,-y,-z
 4   x,-y+1/2,z+1/2

_cell_length_a                           10.2051(16)
_cell_length_b                           6.3872(9)
_cell_length_c                           12.4369(18)
_cell_angle_alpha                        90
_cell_angle_beta                         102.597(12)
_cell_angle_gamma                        90
_cell_volume                             791.1(2)

loop_
 _twin_individual_id
 _twin_individual_mass_fraction_refined
 _twin_individual_twin_matrix_11
 _twin_individual_twin_matrix_12
 _twin_individual_twin_matrix_13
 _twin_individual_twin_matrix_21
 _twin_individual_twin_matrix_22
 _twin_individual_twin_matrix_23
 _twin_individual_twin_matrix_31
 _twin_individual_twin_matrix_32
 _twin_individual_twin_matrix_33
 ? ? ? ? ? ? ? ? ? ? ?

_cell_formula_units_Z                    4

_cell_measurement_reflns_used            3067
_cell_measurement_theta_min              3.36
_cell_measurement_theta_max              32.59
_cell_measurement_temperature            293
_cell_special_details
; ?
;

_exptl_crystal_density_diffrn            6.2118
_exptl_crystal_density_meas              ?
_exptl_crystal_density_method            ?
_exptl_crystal_F_000                     1262

_exptl_absorpt_coefficient_mu            44.651
_exptl_crystal_description               prizm
_exptl_crystal_size_max                  0.08
_exptl_crystal_size_mid                  0.06
_exptl_crystal_size_min                  0.04
_exptl_crystal_size_rad                  ?
_exptl_crystal_colour                    yellow
_exptl_absorpt_correction_type           'multi-scan'
_exptl_absorpt_process_details
;
CrysAlisPro 1.171.41.104a (Rigaku Oxford Diffraction, 2021)
Empirical absorption correction using spherical harmonics,
implemented in SCALE3 ABSPACK scaling algorithm.
;
_exptl_absorpt_correction_T_min          0.799
_exptl_absorpt_correction_T_max          1
loop_
 _exptl_crystal_face_index_h
 _exptl_crystal_face_index_k
 _exptl_crystal_face_index_l
 _exptl_crystal_face_perp_dist
 ? ? ? ?

#=======================================================================

# 7. EXPERIMENTAL DATA

_exptl_special_details                   ?

_diffrn_ambient_temperature              293
_diffrn_source                           'micro-focus sealed X-ray tube'
_diffrn_source_power                     ?
_diffrn_source_voltage                   ?
_diffrn_source_current                   ?
_diffrn_radiation_type                   'Mo K\a'
_diffrn_radiation_source                 'X-ray tube'
_diffrn_radiation_wavelength             0.71073
_diffrn_radiation_monochromator          'mirror'
_diffrn_measurement_device               'four-circle diffractometer'
_diffrn_measurement_device_type          'XtaLAB Synergy, Single source at home/near, HyPix'
_diffrn_detector                         'Hybrid Pixel Array Detector'
_diffrn_detector_area_resol_mean         10.0000
_diffrn_measurement_method               '\w scans'
_diffrn_measurement_specimen_support     ?

_diffrn_reflns_number                    7448
_diffrn_reflns_theta_min                 3.36
_diffrn_reflns_theta_max                 33.14
_diffrn_reflns_theta_full                31
_diffrn_measured_fraction_theta_max      0.86
_diffrn_measured_fraction_theta_full     0.98
_diffrn_reflns_av_R_equivalents          0.0466
_diffrn_reflns_av_unetI/netI             0.0615
_diffrn_reflns_limit_h_min               -14
_diffrn_reflns_limit_h_max               9
_diffrn_reflns_limit_k_min               -7
_diffrn_reflns_limit_k_max               9
_diffrn_reflns_limit_l_min               -18
_diffrn_reflns_limit_l_max               17
_diffrn_reflns_reduction_process         ?

_diffrn_standards_number                 ?
_diffrn_standards_interval_count         ?
_diffrn_standards_interval_time          ?
_diffrn_standards_decay_%                ?
loop_
_diffrn_standard_refln_index_h
_diffrn_standard_refln_index_k
_diffrn_standard_refln_index_l
  ? ? ?

_diffrn_radiation_probe                  X-ray

#=======================================================================

# 8. REFINEMENT DATA

_refine_special_details
; ?
;

_reflns_number_total                     2601
_reflns_number_gt                        1758
_reflns_threshold_expression             'I>3\s(I)'

_refine_ls_structure_factor_coef         F
_refine_ls_R_factor_gt                   0.0342
_refine_ls_wR_factor_gt                  0.0318
_refine_ls_R_factor_all                  0.0659
_refine_ls_wR_factor_ref                 0.0351
_refine_ls_goodness_of_fit_ref           1.12
_refine_ls_goodness_of_fit_gt            1.25
_refine_ls_restrained_S_gt               ?
_refine_ls_restrained_S_all              ?
_refine_ls_number_reflns                 2601
_refine_ls_number_parameters             156
_refine_ls_number_restraints             0
_refine_ls_number_constraints            18
_refine_ls_weighting_scheme              sigma
_refine_ls_weighting_details             'w=1/(\s^2^(F)+0.0001F^2^)'
_refine_ls_hydrogen_treatment            ?
_refine_ls_shift/su_max                  0.0411
_refine_ls_shift/su_mean                 0.0066
_refine_diff_density_max                 ?
_refine_diff_density_min                 ?
_refine_ls_extinction_method             'none'
_refine_ls_extinction_coef               ?
_refine_ls_abs_structure_details         ?
_refine_ls_abs_structure_Flack           ?
_refine_ls_abs_structure_Rogers          ?

loop_
 _atom_type_symbol
 _atom_type_scat_dispersion_real
 _atom_type_scat_dispersion_imag
 _atom_type_scat_source
 B    0.0013  0.0007
 'International Tables Vol C tables 4.2.6.8 and 6.1.1.1'
 Ba  -0.3244  2.2819
 'International Tables Vol C tables 4.2.6.8 and 6.1.1.1'
 Bi  -4.1077 10.2566
 'International Tables Vol C tables 4.2.6.8 and 6.1.1.1'
 Eu  -0.1578  3.6682
 'International Tables Vol C tables 4.2.6.8 and 6.1.1.1'
 O    0.0106  0.0060
 'International Tables Vol C tables 4.2.6.8 and 6.1.1.1'

_computing_data_collection
 'CrysAlisPro 1.171.41.104a (Rigaku OD, 2021)'
_computing_cell_refinement
 'CrysAlisPro 1.171.41.104a (Rigaku OD, 2021)'
_computing_data_reduction
 'CrysAlisPro 1.171.41.104a (Rigaku OD, 2021)'
_computing_structure_solution            ?
_computing_structure_refinement          ?
_computing_molecular_graphics            ?
_computing_publication_material          ?

loop_
 _restr_distance_atom_site_label_1
 _restr_distance_site_symmetry_1
 _restr_distance_atom_site_label_2
 _restr_distance_site_symmetry_2
 _restr_distance_target
 _restr_distance_target_weight_param
 ? ? ? ? ? ?

loop_
 _restr_angle_atom_site_label_1
 _restr_angle_site_symmetry_1
 _restr_angle_atom_site_label_2
 _restr_angle_site_symmetry_2
 _restr_angle_atom_site_label_3
 _restr_angle_site_symmetry_3
 _restr_angle_target
 _restr_angle_target_weight_param
 ? ? ? ? ? ? ? ?

loop_
 _restr_torsion_atom_site_label_1
 _restr_torsion_site_symmetry_1
 _restr_torsion_atom_site_label_2
 _restr_torsion_site_symmetry_2
 _restr_torsion_atom_site_label_3
 _restr_torsion_site_symmetry_3
 _restr_torsion_atom_site_label_4
 _restr_torsion_site_symmetry_4
 _restr_torsion_angle_target
 _restr_torsion_weight_param
 ? ? ? ? ? ? ? ? ? ?

loop_
 _restr_equal_distance_atom_site_label_1
 _restr_equal_distance_site_symmetry_1
 _restr_equal_distance_atom_site_label_2
 _restr_equal_distance_site_symmetry_2
 _restr_equal_distance_class_class_id
 _restr_equal_distance_class_target_weight_param
 ? ? ? ? ? ?

loop_
 _restr_equal_angle_atom_site_label_1
 _restr_equal_angle_site_symmetry_1
 _restr_equal_angle_atom_site_label_2
 _restr_equal_angle_site_symmetry_2
 _restr_equal_angle_atom_site_label_3
 _restr_equal_angle_site_symmetry_3
 _restr_equal_angle_class_class_id
 _restr_equal_angle_class_target_weight_param
 ? ? ? ? ? ? ? ?

loop_
 _restr_equal_torsion_atom_site_label_1
 _restr_equal_torsion_site_symmetry_1
 _restr_equal_torsion_atom_site_label_2
 _restr_equal_torsion_site_symmetry_2
 _restr_equal_torsion_atom_site_label_3
 _restr_equal_torsion_site_symmetry_3
 _restr_equal_torsion_atom_site_label_4
 _restr_equal_torsion_site_symmetry_4
 _restr_equal_torsion_class_class_id
 _restr_equal_torsion_class_target_weight_param
 ? ? ? ? ? ? ? ? ? ?


#=======================================================================

# 9. ATOMIC COORDINATES AND DISPLACEMENT PARAMETERS

loop_
 _atom_site_label
 _atom_site_type_symbol
 _atom_site_fract_x
 _atom_site_fract_y
 _atom_site_fract_z
 _atom_site_adp_type
 _atom_site_U_iso_or_equiv
 _atom_site_site_symmetry_multiplicity
 _atom_site_occupancy
 _atom_site_calc_flag
 _atom_site_refinement_flags
 _atom_site_disorder_assembly
 _atom_site_disorder_group
  Bi1 Bi 0.48344(4) 0.17380(6) 0.11882(3) Uani 0.01249(13) 4 0.778(12) d . . .
  Eu1' Eu 0.48344(4) 0.17380(6) 0.11882(3) Uani 0.01249(13) 4 0.222(12) d . . .
  Bi2 Bi 0.72935(4) 0.14643(5) 0.37331(3) Uani 0.01268(12) 4 0.888(12) d . . .
  Eu2' Eu 0.72935(4) 0.14643(5) 0.37331(3) Uani 0.01268(12) 4 0.112(12) d . . .
  Ba1 Ba 0.12756(6) 0.09630(9) -0.12464(5) Uani 0.01277(18) 4 1 d . . .
  O1 O 0.3133(6) 0.4411(9) -0.1086(5) Uani 0.011(2) 4 1 d . . .
  O2 O 0.7102(7) -0.2136(10) 0.2761(6) Uani 0.021(2) 4 1 d . . .
  O3 O 0.5592(7) -0.1312(10) 0.0925(5) Uani 0.018(2) 4 1 d . . .
  O4 O -0.1336(6) -0.0081(10) -0.2296(5) Uani 0.013(2) 4 1 d . . .
  O5 O 0.7278(6) 0.4966(10) 0.4062(5) Uani 0.016(2) 4 1 d . . .
  O6 O 0.4956(7) 0.0861(10) 0.2917(6) Uani 0.018(2) 4 1 d . . .
  O7 O 0.1269(6) -0.3319(9) -0.1009(5) Uani 0.014(2) 4 1 d . . .
  O8 O 0.7124(6) 0.2221(10) 0.2035(5) Uani 0.015(2) 4 1 d . . .
  O9 O 0.9459(7) 0.0785(10) 0.3650(6) Uani 0.018(2) 4 1 d . . .
  O10 O 0.0889(7) 0.2297(10) 0.0764(5) Uani 0.016(2) 4 1 d . . .
  B1 B -0.1984(11) -0.1256(16) -0.1573(8) Uani 0.010(3) 4 1 d . . .
  B2 B 0.0056(11) 0.3872(15) 0.1031(9) Uani 0.013(3) 4 1 d . . .
  B3 B 0.3882(13) 0.2035(18) 0.3296(10) Uani 0.020(4) 4 1 d . . .
  B4 B 0.2165(10) 0.5881(16) -0.1732(9) Uani 0.011(3) 4 1 d . . .

loop_
 _atom_site_aniso_label
 _atom_site_aniso_type_symbol
 _atom_site_aniso_U_11
 _atom_site_aniso_U_22
 _atom_site_aniso_U_33
 _atom_site_aniso_U_12
 _atom_site_aniso_U_13
 _atom_site_aniso_U_23
 Bi1 Bi 0.0125(2) 0.0119(2) 0.0135(2) 0.00093(13) 0.00371(15) -0.00079(13)
 Eu1' Eu 0.0125(2) 0.0119(2) 0.0135(2) 0.00093(13) 0.00371(15) -0.00079(13)
 Bi2 Bi 0.0121(2) 0.0119(2) 0.0143(2) -0.00093(13) 0.00321(14) 0.00031(13)
 Eu2' Eu 0.0121(2) 0.0119(2) 0.0143(2) -0.00093(13) 0.00321(14) 0.00031(13)
 Ba1 Ba 0.0140(3) 0.0109(3) 0.0139(3) -0.00065(19) 0.0041(2) -0.00064(19)
 O1 O 0.008(3) 0.010(3) 0.013(3) 0.003(2) 0.000(3) 0.004(2)
 O2 O 0.018(4) 0.015(4) 0.030(4) 0.001(3) 0.006(3) 0.007(3)
 O3 O 0.026(4) 0.012(3) 0.018(4) 0.011(3) 0.009(3) 0.006(3)
 O4 O 0.007(3) 0.015(4) 0.017(4) 0.000(2) 0.004(3) 0.003(2)
 O5 O 0.011(3) 0.015(4) 0.021(4) -0.004(3) 0.005(3) -0.007(3)
 O6 O 0.011(4) 0.026(4) 0.018(4) 0.003(3) 0.008(3) -0.002(3)
 O7 O 0.007(3) 0.013(4) 0.022(4) -0.006(2) 0.000(3) -0.002(3)
 O8 O 0.015(4) 0.011(3) 0.017(4) -0.004(3) 0.001(3) 0.003(3)
 O9 O 0.009(4) 0.016(4) 0.031(4) -0.001(3) 0.006(3) 0.001(3)
 O10 O 0.018(4) 0.013(3) 0.017(4) 0.005(3) 0.008(3) 0.001(3)
 B1 B 0.013(5) 0.007(5) 0.010(5) -0.005(4) 0.001(4) 0.001(4)
 B2 B 0.013(5) 0.011(4) 0.015(5)  0.0035(18) 0.0045(17) -0.004(18)
 B3 B 0.028(7) 0.016(6) 0.018(6) -0.004(5) 0.008(5) -0.006(4)
 B4 B 0.006(5) 0.016(5) 0.011(5) -0.004(4) 0.003(4) -0.006(4)

loop_
 _jana_atom_site_ADP_C_label
 _jana_atom_site_ADP_C_type_symbol
 _jana_atom_site_ADP_C_111
 _jana_atom_site_ADP_C_112
 _jana_atom_site_ADP_C_113
 _jana_atom_site_ADP_C_122
 _jana_atom_site_ADP_C_123
 _jana_atom_site_ADP_C_133
 _jana_atom_site_ADP_C_222
 _jana_atom_site_ADP_C_223
 _jana_atom_site_ADP_C_233
 _jana_atom_site_ADP_C_333
 ? ? ? ? ? ? ? ? ? ? ? ?

loop_
 _jana_atom_site_ADP_D_label
 _jana_atom_site_ADP_D_type_symbol
 _jana_atom_site_ADP_D_1111
 _jana_atom_site_ADP_D_1112
 _jana_atom_site_ADP_D_1113
 _jana_atom_site_ADP_D_1122
 _jana_atom_site_ADP_D_1123
 _jana_atom_site_ADP_D_1133
 _jana_atom_site_ADP_D_1222
 _jana_atom_site_ADP_D_1223
 _jana_atom_site_ADP_D_1233
 _jana_atom_site_ADP_D_1333
 _jana_atom_site_ADP_D_2222
 _jana_atom_site_ADP_D_2223
 _jana_atom_site_ADP_D_2233
 _jana_atom_site_ADP_D_2333
 _jana_atom_site_ADP_D_3333
 ? ? ? ? ? ? ? ? ? ? ? ? ? ? ? ? ?

loop_
 _jana_atom_site_ADP_E_label
 _jana_atom_site_ADP_E_type_symbol
 _jana_atom_site_ADP_E_11111
 _jana_atom_site_ADP_E_11112
 _jana_atom_site_ADP_E_11113
 _jana_atom_site_ADP_E_11122
 _jana_atom_site_ADP_E_11123
 _jana_atom_site_ADP_E_11133
 _jana_atom_site_ADP_E_11222
 _jana_atom_site_ADP_E_11223
 _jana_atom_site_ADP_E_11233
 _jana_atom_site_ADP_E_11333
 _jana_atom_site_ADP_E_12222
 _jana_atom_site_ADP_E_12223
 _jana_atom_site_ADP_E_12233
 _jana_atom_site_ADP_E_12333
 _jana_atom_site_ADP_E_13333
 _jana_atom_site_ADP_E_22222
 _jana_atom_site_ADP_E_22223
 _jana_atom_site_ADP_E_22233
 _jana_atom_site_ADP_E_22333
 _jana_atom_site_ADP_E_23333
 _jana_atom_site_ADP_E_33333
 ? ? ? ? ? ? ? ? ? ? ? ? ? ? ? ? ? ? ? ? ? ? ?

loop_
 _jana_atom_site_ADP_F_label
 _jana_atom_site_ADP_F_type_symbol
 _jana_atom_site_ADP_F_111111
 _jana_atom_site_ADP_F_111112
 _jana_atom_site_ADP_F_111113
 _jana_atom_site_ADP_F_111122
 _jana_atom_site_ADP_F_111123
 _jana_atom_site_ADP_F_111133
 _jana_atom_site_ADP_F_111222
 _jana_atom_site_ADP_F_111223
 _jana_atom_site_ADP_F_111233
 _jana_atom_site_ADP_F_111333
 _jana_atom_site_ADP_F_112222
 _jana_atom_site_ADP_F_112223
 _jana_atom_site_ADP_F_112233
 _jana_atom_site_ADP_F_112333
 _jana_atom_site_ADP_F_113333
 _jana_atom_site_ADP_F_122222
 _jana_atom_site_ADP_F_122223
 _jana_atom_site_ADP_F_122233
 _jana_atom_site_ADP_F_122333
 _jana_atom_site_ADP_F_123333
 _jana_atom_site_ADP_F_133333
 _jana_atom_site_ADP_F_222222
 _jana_atom_site_ADP_F_222223
 _jana_atom_site_ADP_F_222233
 _jana_atom_site_ADP_F_222333
 _jana_atom_site_ADP_F_223333
 _jana_atom_site_ADP_F_233333
 _jana_atom_site_ADP_F_333333
 ? ? ? ? ? ? ? ? ? ? ? ? ? ? ? ? ? ? ? ? ? ? ? ? ? ? ? ? ? ?


#=======================================================================

# 10. MOLECULAR GEOMETRY


loop_
 _geom_bond_atom_site_label_1
 _geom_bond_atom_site_label_2
 _geom_bond_site_symmetry_1
 _geom_bond_site_symmetry_2
 _geom_bond_distance
 _geom_bond_publ_flag
  Bi1 O2 . 2_655 2.694(8) ?
  Bi1 O3 . . 2.147(6) ?
  Bi1 O3 . 3_655 2.583(7) ?
  Bi1 O5 . 2_645 2.394(6) ?
  Bi1 O6 . . 2.200(7) ?
  Bi1 O6 . 2_655 2.849(7) ?
  Bi1 O8 . . 2.364(6) ?
  Eu1' O2 . 2_655 2.694(8) ?
  Eu1' O3 . . 2.147(6) ?
  Eu1' O3 . 3_655 2.583(7) ?
  Eu1' O5 . 2_645 2.394(6) ?
  Eu1' O6 . . 2.200(7) ?
  Eu1' O6 . 2_655 2.849(7) ?
  Eu1' O8 . . 2.364(6) ?
  Bi2 O2 . . 2.586(7) ?
  Bi2 O5 . . 2.275(6) ?
  Bi2 O6 . . 2.411(6) ?
  Bi2 O7 . 2_655 2.893(6) ?
  Bi2 O8 . . 2.137(7) ?
  Bi2 O9 . . 2.277(7) ?
  Eu2' O2 . . 2.586(7) ?
  Eu2' O5 . . 2.275(6) ?
  Eu2' O6 . . 2.411(6) ?
  Eu2' O7 . 2_655 2.893(6) ?
  Eu2' O8 . . 2.137(7) ?
  Eu2' O9 . . 2.277(7) ?
  Ba1 O1 . . 2.884(6) ?
  Ba1 O2 . 3_655 2.865(8) ?
  Ba1 O4 . . 2.781(6) ?
  Ba1 O5 . 2_645 2.866(6) ?
  Ba1 O7 . . 2.751(6) ?
  Ba1 O8 . 3_655 2.910(7) ?
  Ba1 O9 . 4_454 2.768(7) ?
  Ba1 O10 . . 2.750(7) ?
  B1 O1 . 2_544 2.923(11) ?
  B1 O2 . 4_444 1.507(12) ?
  B1 O4 . . 1.439(13) ?
  B1 O5 . 4_454 1.459(13) ?
  B1 O10 . 3_555 1.488(11) ?
  B2 O4 . 4_555 2.869(14) ?
  B2 O7 . 3_555 1.392(13) ?
  B2 O9 . 2_655 1.345(12) ?
  B2 O9 . 4_454 2.898(13) ?
  B2 O10 . . 1.403(13) ?
  B3 O1 . 4_555 1.512(15) ?
  B3 O2 . 2_655 1.563(13) ?
  B3 O3 . 2_655 1.454(13) ?
  B3 O4 . 3_555 2.906(13) ?
  B3 O6 . . 1.486(15) ?
  B4 O1 . . 1.469(11) ?
  B4 O2 . 3_655 2.887(13) ?
  B4 O4 . 2_554 1.451(11) ?
  B4 O7 . 1_565 1.505(14) ?
  B4 O8 . 3_665 1.503(13) ?

loop_
 _geom_angle_atom_site_label_1
 _geom_angle_atom_site_label_2
 _geom_angle_atom_site_label_3
 _geom_angle_site_symmetry_1
 _geom_angle_site_symmetry_2
 _geom_angle_site_symmetry_3
 _geom_angle
 _geom_angle_publ_flag
  O2 Bi1 O3 2_655 . . 130.0(2) ?
  O2 Bi1 O3 2_655 . 3_655 122.9(2) ?
  O2 Bi1 O5 2_655 . 2_645 56.9(2) ?
  O2 Bi1 O6 2_655 . . 59.0(2) ?
  O2 Bi1 O6 2_655 . 2_655 64.2(2) ?
  O2 Bi1 O8 2_655 . . 120.5(2) ?
  O3 Bi1 O3 . . 3_655 74.7(2) ?
  O3 Bi1 O5 . . 2_645 84.0(2) ?
  O3 Bi1 O6 . . . 88.4(3) ?
  O3 Bi1 O6 . . 2_655 154.1(2) ?
  O3 Bi1 O8 . . . 80.4(2) ?
  O3 Bi1 O5 3_655 . 2_645 82.6(2) ?
  O3 Bi1 O6 3_655 . . 158.3(2) ?
  O3 Bi1 O6 3_655 . 2_655 118.45(19) ?
  O3 Bi1 O8 3_655 . . 113.4(2) ?
  O5 Bi1 O6 2_645 . . 82.2(2) ?
  O5 Bi1 O6 2_645 . 2_655 118.5(2) ?
  O5 Bi1 O8 2_645 . . 153.4(2) ?
  O6 Bi1 O6 . . 2_655 82.5(2) ?
  O6 Bi1 O8 . . . 76.0(2) ?
  O6 Bi1 O8 2_655 . . 73.9(2) ?
  O2 Eu1' O3 2_655 . . 130.0(2) ?
  O2 Eu1' O3 2_655 . 3_655 122.9(2) ?
  O2 Eu1' O5 2_655 . 2_645 56.9(2) ?
  O2 Eu1' O6 2_655 . . 59.0(2) ?
  O2 Eu1' O6 2_655 . 2_655 64.2(2) ?
  O2 Eu1' O8 2_655 . . 120.5(2) ?
  O3 Eu1' O3 . . 3_655 74.7(2) ?
  O3 Eu1' O5 . . 2_645 84.0(2) ?
  O3 Eu1' O6 . . . 88.4(3) ?
  O3 Eu1' O6 . . 2_655 154.1(2) ?
  O3 Eu1' O8 . . . 80.4(2) ?
  O3 Eu1' O5 3_655 . 2_645 82.6(2) ?
  O3 Eu1' O6 3_655 . . 158.3(2) ?
  O3 Eu1' O6 3_655 . 2_655 118.45(19) ?
  O3 Eu1' O8 3_655 . . 113.4(2) ?
  O5 Eu1' O6 2_645 . . 82.2(2) ?
  O5 Eu1' O6 2_645 . 2_655 118.5(2) ?
  O5 Eu1' O8 2_645 . . 153.4(2) ?
  O6 Eu1' O6 . . 2_655 82.5(2) ?
  O6 Eu1' O8 . . . 76.0(2) ?
  O6 Eu1' O8 2_655 . . 73.9(2) ?
  O2 Bi2 O5 . . . 162.9(2) ?
  O2 Bi2 O6 . . . 72.2(2) ?
  O2 Bi2 O7 . . 2_655 118.05(19) ?
  O2 Bi2 O8 . . . 76.0(2) ?
  O2 Bi2 O9 . . . 77.5(2) ?
  O5 Bi2 O6 . . . 100.8(2) ?
  O5 Bi2 O7 . . 2_655 78.4(2) ?
  O5 Bi2 O8 . . . 87.3(2) ?
  O5 Bi2 O9 . . . 103.9(2) ?
  O6 Bi2 O7 . . 2_655 131.6(2) ?
  O6 Bi2 O8 . . . 76.2(2) ?
  O6 Bi2 O9 . . . 146.3(2) ?
  O7 Bi2 O8 2_655 . . 150.5(2) ?
  O7 Bi2 O9 2_655 . . 76.3(2) ?
  O8 Bi2 O9 . . . 82.5(3) ?
  O2 Eu2' O5 . . . 162.9(2) ?
  O2 Eu2' O6 . . . 72.2(2) ?
  O2 Eu2' O7 . . 2_655 118.05(19) ?
  O2 Eu2' O8 . . . 76.0(2) ?
  O2 Eu2' O9 . . . 77.5(2) ?
  O5 Eu2' O6 . . . 100.8(2) ?
  O5 Eu2' O7 . . 2_655 78.4(2) ?
  O5 Eu2' O8 . . . 87.3(2) ?
  O5 Eu2' O9 . . . 103.9(2) ?
  O6 Eu2' O7 . . 2_655 131.6(2) ?
  O6 Eu2' O8 . . . 76.2(2) ?
  O6 Eu2' O9 . . . 146.3(2) ?
  O7 Eu2' O8 2_655 . . 150.5(2) ?
  O7 Eu2' O9 2_655 . . 76.3(2) ?
  O8 Eu2' O9 . . . 82.5(3) ?
  O1 Ba1 O2 . . 3_655 51.73(19) ?
  O1 Ba1 O4 . . . 139.79(17) ?
  O1 Ba1 O5 . . 2_645 84.79(17) ?
  O1 Ba1 O7 . . . 140.24(18) ?
  O1 Ba1 O8 . . 3_655 98.52(18) ?
  O1 Ba1 O9 . . 4_454 81.58(18) ?
  O1 Ba1 O10 . . . 85.58(19) ?
  O2 Ba1 O4 3_655 . . 112.70(19) ?
  O2 Ba1 O5 3_655 . 2_645 115.43(19) ?
  O2 Ba1 O7 3_655 . . 110.2(2) ?
  O2 Ba1 O8 3_655 . 3_655 60.92(19) ?
  O2 Ba1 O9 3_655 . 4_454 104.5(2) ?
  O2 Ba1 O10 3_655 . . 137.28(19) ?
  O4 Ba1 O5 . . 2_645 129.37(19) ?
  O4 Ba1 O7 . . . 77.73(18) ?
  O4 Ba1 O8 . . 3_655 103.01(18) ?
  O4 Ba1 O9 . . 4_454 66.09(18) ?
  O4 Ba1 O10 . . . 100.85(19) ?
  O5 Ba1 O7 2_645 . . 71.95(18) ?
  O5 Ba1 O8 2_645 . 3_655 87.32(18) ?
  O5 Ba1 O9 2_645 . 4_454 114.3(2) ?
  O5 Ba1 O10 2_645 . . 49.72(19) ?
  O7 Ba1 O8 . . 3_655 49.9(2) ?
  O7 Ba1 O9 . . 4_454 137.2(2) ?
  O7 Ba1 O10 . . . 101.9(2) ?
  O8 Ba1 O9 3_655 . 4_454 158.17(19) ?
  O8 Ba1 O10 3_655 . . 136.51(18) ?
  O9 Ba1 O10 4_454 . . 65.3(2) ?
  O1 B1 O2 2_544 . 4_444 59.1(4) ?
  O1 B1 O4 2_544 . . 56.0(4) ?
  O1 B1 O5 2_544 . 4_454 108.3(5) ?
  O1 B1 O10 2_544 . 3_555 144.9(7) ?
  O2 B1 O4 4_444 . . 109.0(8) ?
  O2 B1 O5 4_444 . 4_454 110.6(8) ?
  O2 B1 O10 4_444 . 3_555 110.5(7) ?
  O4 B1 O5 . . 4_454 113.9(7) ?
  O4 B1 O10 . . 3_555 106.0(8) ?
  O5 B1 O10 4_454 . 3_555 106.6(7) ?
  O4 B2 O7 4_555 . 3_555 56.7(5) ?
  O4 B2 O9 4_555 . 2_655 75.5(6) ?
  O4 B2 O9 4_555 . 4_454 133.9(4) ?
  O4 B2 O10 4_555 . . 141.8(7) ?
  O7 B2 O9 3_555 . 2_655 122.0(9) ?
  O7 B2 O9 3_555 . 4_454 90.7(5) ?
  O7 B2 O10 3_555 . . 116.7(8) ?
  O9 B2 O9 2_655 . 4_454 102.4(6) ?
  O9 B2 O10 2_655 . . 121.2(9) ?
  O9 B2 O10 4_454 . . 79.4(5) ?
  O1 B3 O2 4_555 . 2_655 109.3(8) ?
  O1 B3 O3 4_555 . 2_655 105.0(9) ?
  O1 B3 O4 4_555 . 3_555 56.7(4) ?
  O1 B3 O6 4_555 . . 110.0(8) ?
  O2 B3 O3 2_655 . 2_655 113.0(8) ?
  O2 B3 O4 2_655 . 3_555 55.6(5) ?
  O2 B3 O6 2_655 . . 106.7(8) ?
  O3 B3 O4 2_655 . 3_555 139.7(8) ?
  O3 B3 O6 2_655 . . 112.8(9) ?
  O4 B3 O6 3_555 . . 107.4(6) ?
  O1 B4 O2 . . 3_655 60.3(5) ?
  O1 B4 O4 . . 2_554 112.7(8) ?
  O1 B4 O7 . . 1_565 108.3(8) ?
  O1 B4 O8 . . 3_665 110.4(7) ?
  O2 B4 O4 3_655 . 2_554 56.0(4) ?
  O2 B4 O7 3_655 . 1_565 142.7(7) ?
  O2 B4 O8 3_655 . 3_665 111.8(6) ?
  O4 B4 O7 2_554 . 1_565 108.8(7) ?
  O4 B4 O8 2_554 . 3_665 111.0(8) ?
  O7 B4 O8 1_565 . 3_665 105.4(7) ?

loop_
 _geom_torsion_atom_site_label_1
 _geom_torsion_atom_site_label_2
 _geom_torsion_atom_site_label_3
 _geom_torsion_atom_site_label_4
 _geom_torsion_site_symmetry_1
 _geom_torsion_site_symmetry_2
 _geom_torsion_site_symmetry_3
 _geom_torsion_site_symmetry_4
 _geom_torsion
 _geom_torsion_publ_flag
 ? ? ? ? ? ? ? ? ? ?

loop_
 _geom_hbond_atom_site_label_D
 _geom_hbond_atom_site_label_H
 _geom_hbond_atom_site_label_A
 _geom_hbond_site_symmetry_D
 _geom_hbond_site_symmetry_H
 _geom_hbond_site_symmetry_A
 _geom_hbond_distance_DH
 _geom_hbond_distance_HA
 _geom_hbond_distance_DA
 _geom_hbond_angle_DHA
 _geom_hbond_publ_flag
 ? ? ? ? ? ? ? ? ? ? ?


#=======================================================================

# 11. STRUCTURE-FACTOR LIST

loop_
 _refln_index_h
 _refln_index_k
 _refln_index_l
 _refln_F_squared_calc
 _refln_F_squared_meas
 _refln_F_squared_sigma
 _refln_observed_status
   2   0   0   1339.79   1352.91    115.63 o
   3   0   0  79410.60  83406.40   2185.47 o
   4   0   0  87868.20  88922.10   1954.20 o
   5   0   0 266001.00 253110.00   5191.94 o
   6   0   0    529.90    878.81    185.01 o
   7   0   0  20495.90  18617.00    601.29 o
   8   0   0  98265.00  91038.20   2046.71 o
   9   0   0  34344.80  34412.50   1873.26 o
  10   0   0   1575.56   2162.35    635.98 o
  11   0   0    146.26    312.21    705.36 <
  12   0   0   2954.57   3954.66    936.63 o
  13   0   0  25827.20  27867.70   1954.20 o
  14   0   0   4143.57   3885.28   1098.52 o
   1   1   0   9743.45  10117.90    265.96 o
   2   1   0   6426.74   6302.02    219.70 o
   3   1   0 127116.00 128769.00   2069.84 o
   4   1   0  37474.00  38205.30    797.87 o
   5   1   0   9721.32   8660.94    381.59 o
   6   1   0   4490.54   4694.72    323.77 o
   7   1   0  26160.80  25555.00    821.00 o
   8   1   0  52337.30  48808.90   1341.35 o
   9   1   0   7414.31   6197.95    566.60 o
  10   1   0   1995.44   1410.73    312.21 o
  11   1   0  19273.50  20975.90    890.38 o
  12   1   0  33654.20  34805.70   2139.22 o
  13   1   0   5763.56   6221.08   1156.33 o
   0   2   0  23072.50  23450.50   1098.52 o
   1   2   0  41432.40  42946.30    716.93 o
   2   2   0   5170.83   5862.62    173.45 o
   3   2   0   2140.43   2266.42    127.20 o
   4   2   0  42257.10  42310.30    740.05 o
   5   2   0  13418.80  13274.70    312.21 o
   6   2   0    761.73    682.24    138.76 o
   7   2   0   4251.42   3607.76    265.96 o
   8   2   0   1679.48   1769.19    242.83 o
   9   2   0  11673.50  12604.00    624.42 o
  10   2   0   2630.70   2601.75    520.35 o
  11   2   0   2023.85   1491.67    520.35 <
  12   2   0   1489.58    589.73    543.48 <
  13   2   0    529.91   1017.57    635.98 <
   1   3   0    666.30   1954.20    289.08 o
   2   3   0  19185.10  19703.90    381.59 o
   3   3   0  20099.90  19461.10    404.72 o
   4   3   0   2898.12   3110.54    173.45 o
   5   3   0  32177.00  32203.90    647.55 o
   6   3   0   7120.47   6452.35    277.52 o
   7   3   0    470.76    601.29    173.45 o
   8   3   0    300.58    104.07    196.58 <
   9   3   0   1085.36    127.20    393.15 <
  10   3   0  20716.60  22028.20   1086.95 o
  11   3   0   1692.55   1907.95    566.60 o
  12   3   0   1152.21    346.90    624.42 <
  13   3   0   2529.93   2659.57    728.49 o
   0   4   0 113995.00 110037.00   4463.45 o
   1   4   0    827.17    531.91    265.96 <
   2   4   0   3979.50   4185.93    173.45 o
   3   4   0   8443.44   7689.62    242.83 o
   4   4   0  13467.50  13459.70    358.46 o
   5   4   0  23808.70  24514.30    543.48 o
   6   4   0   1271.58    948.19    185.01 o
   7   4   0  11213.80  11008.30    346.90 o
   8   4   0  22850.50  22594.80    566.60 o
   9   4   0   4906.99   5180.38    416.28 o
  10   4   0    389.44    682.24    450.97 <
  11   4   0   1061.56    474.10    543.48 <
  12   4   0    922.79    659.11    601.29 <
  13   4   0  10324.60  11447.70   1017.57 o
   1   5   0  32050.00  32250.20   1318.22 o
   2   5   0     30.17    138.76    370.03 <
   3   5   0  31939.60  31417.60    635.98 o
   4   5   0  20510.50  19888.90    462.53 o
   5   5   0   1194.67   1295.09    196.58 o
   6   5   0   4643.60   4532.83    300.65 o
   7   5   0  26365.80  26827.00    693.80 o
   8   5   0  30293.80  30827.90    705.36 o
   9   5   0    213.61     92.51    439.41 <
  10   5   0    547.98    138.76    508.79 <
  11   5   0   4757.95   4058.73    682.24 o
  12   5   0  18751.10  21519.40   1248.84 o
   0   6   0  23422.00  23993.90   1699.81 o
   1   6   0  46989.40  47641.00   1838.57 o
   2   6   0    649.83    740.05    485.66 <
   3   6   0   1619.39   1364.47    520.35 <
   4   6   0  72469.60  66766.70   1260.40 o
   5   6   0  13742.80  13159.10    404.72 o
   6   6   0    440.05    450.97    254.39 <
   7   6   0   2024.09   1746.06    312.21 o
   8   6   0   3802.94   4104.99    474.10 o
   9   6   0  24363.30  26202.50   1688.25 o
  10   6   0    506.12    485.66    751.62 <
  11   6   0   5496.07   4081.86    948.19 o
   1   7   0   3921.38   4024.04    670.67 o
   2   7   0  10738.20  10707.70    925.07 o
   3   7   0     89.89    312.21    555.04 <
   4   7   0   2162.45   1722.94    612.86 <
   5   7   0   8053.91   6371.40    844.12 o
   6   7   0    471.84     11.56    462.53 <
   7   7   0  13357.30  15217.40   1595.74 o
   8   7   0   7280.24   7897.76    982.88 o
   9   7   0    576.84    601.29    867.25 <
   0   8   0    150.77    161.89    913.50 <
   1   8   0   7528.99   8811.27    982.88 o
   2   8   0  16186.90  16373.70   1214.15 o
   3   8   0   6328.44   5827.93    867.25 o
   4   8   0    987.25   1167.90    682.24 <
   5   8   0   1555.61   1295.09    740.05 <
   6   8   0   8620.74   8082.78    994.45 o
   7   8   0   9317.65  10245.10   1526.36 o
   8   8   0    122.28   2624.88   1156.33 <
   1   9   0  12732.60  12765.90   1225.71 o
   2   9   0     75.16   -543.48   1086.95 <
   3   9   0   1833.81   1086.95   1214.15 <
   4   9   0    772.75   1456.98   1133.21 <
 -14   1   1   1505.90   1896.39   1006.01 <
 -13   1   1   5086.42   4347.82   1017.57 o
 -12   1   1  12467.00  14986.10   1364.47 o
 -11   1   1   3791.16   2844.58    416.28 o
 -10   1   1     89.12    104.07    277.52 <
  -9   1   1   1034.24    855.69    393.15 <
  -8   1   1   2730.01   2243.29    335.34 o
  -7   1   1   7039.25   6672.05    404.72 o
  -6   1   1  34476.60  33753.40    948.19 o
  -5   1   1   4405.34   4313.13    277.52 o
  -4   1   1  38514.60  37869.90   1133.21 o
  -3   1   1  33306.60  35256.60    740.05 o
  -2   1   1  11222.10  10580.50    289.08 o
  -1   1   1  27252.80  28954.60    578.17 o
   0   1   1   5076.59   5064.74    242.83 o
   1   1   1  12014.70  12511.50    323.77 o
   2   1   1  61839.20  61204.80   1144.77 o
   3   1   1  66450.40  66107.60   1260.40 o
   4   1   1    306.95    358.46    115.63 o
   5   1   1   2277.52   1757.63    208.14 o
   6   1   1    441.06    635.98    208.14 o
   7   1   1  25994.20  24838.10    809.43 o
   8   1   1  31129.30  30723.80    959.76 o
   9   1   1   7651.54   6961.13    450.97 o
  10   1   1   1759.01   1699.81    346.90 o
  11   1   1  13323.40  12037.40    740.05 o
  12   1   1   2539.52   2150.78    901.94 <
  13   1   1   2668.78   2231.73    982.88 <
 -14   2   1  25419.20  23993.90   1988.90 o
 -13   2   1   4419.55   3133.67    693.80 o
 -12   2   1   3718.89   3295.55    612.86 o
 -11   2   1    159.24   -104.07    485.66 <
 -10   2   1  15133.40  13864.40    832.56 o
  -9   2   1 137334.00 136540.00   3156.79 o
  -8   2   1    316.83    265.96    208.14 <
  -7   2   1     73.53    -46.25    173.45 <
  -6   2   1  57617.20  56070.60    971.32 o
  -5   2   1  72858.70  72779.70   1214.15 o
  -4   2   1 136922.00 136424.00   2069.84 o
  -3   2   1    347.76    508.79     92.51 o
  -2   2   1   8744.89   8845.96    196.58 o
  -1   2   1 311540.00 312118.00   4475.01 o
   0   2   1  52406.80  52358.80    809.43 o
   1   2   1   1310.70   1526.36     80.94 o
   2   2   1   3082.10   3457.44    127.20 o
   3   2   1    767.21   1052.26    104.07 o
   4   2   1 122041.00 118871.00   1827.01 o
   5   2   1    615.24    497.22    127.20 o
   6   2   1  60954.80  59620.60    948.19 o
   7   2   1  12348.90  11713.70    416.28 o
   8   2   1   4547.43   4787.22    312.21 o
   9   2   1   1542.78   1653.56    346.90 o
  10   2   1   4787.44   4532.83    474.10 o
  11   2   1  26899.10  28087.40   1306.66 o
  12   2   1   5303.27   5585.09    740.05 o
  13   2   1   3346.14   2451.43    693.80 o
 -13   3   1  16628.70  16327.40   1133.21 o
 -12   3   1  14126.00  15159.50   1006.01 o
 -11   3   1   2072.94   1491.67    508.79 <
 -10   3   1   4059.37   2636.44    531.91 o
  -9   3   1   4124.30   4058.73    485.66 o
  -8   3   1  27797.10  28873.70    635.98 o
  -7   3   1    675.81    624.42    173.45 o
  -6   3   1  67397.20  67344.90   1179.46 o
  -5   3   1   7098.42   7215.53    265.96 o
  -4   3   1  20605.90  20837.10    450.97 o
  -3   3   1   1619.57   1757.63    127.20 o
  -2   3   1  98384.00  97536.80   1607.30 o
  -1   3   1 111106.00 111020.00   2902.40 o
   0   3   1    986.51    797.87    208.14 o
   1   3   1   1978.21   1630.43    173.45 o
   2   3   1  99922.30  99652.90   1514.80 o
   3   3   1 156064.00 155851.00   2324.23 o
   4   3   1  17601.50  17564.70    370.03 o
   5   3   1    377.54    624.42    150.32 o
   6   3   1  14071.10  14338.50    358.46 o
   7   3   1  99523.00  99086.30   1630.43 o
   8   3   1  35643.40  38413.40    786.31 o
   9   3   1    372.63    127.20    323.77 <
  10   3   1   4322.10   4579.08    612.86 o
  11   3   1  33415.10  33718.70   1456.98 o
  12   3   1  20811.90  20455.60   1202.59 o
  13   3   1   1090.25   1318.22    682.24 <
 -13   4   1  17218.00  17414.40   1191.02 o
 -12   4   1    192.18    474.10    578.17 <
 -11   4   1   2327.54   1630.43    520.35 o
 -10   4   1  26143.60  27220.10   1202.59 o
  -9   4   1  14465.90  15217.40    612.86 o
  -8   4   1  28069.70  27902.30    682.24 o
  -7   4   1   3120.80   3122.10    265.96 o
  -6   4   1  11949.60  12095.30    393.15 o
  -5   4   1  78286.30  78075.70   1306.66 o
  -4   4   1  12501.90  12118.40    335.34 o
  -3   4   1   4601.48   5053.18    208.14 o
  -2   4   1  20378.50  19148.90    393.15 o
  -1   4   1  20632.10  20721.50    925.07 o
   0   4   1  57928.40  53445.80   1757.63 o
   1   4   1   1684.64   2347.36    346.90 o
   2   4   1   4329.54   4266.87    196.58 o
   3   4   1  34248.00  34574.40    635.98 o
   4   4   1   9039.66   9366.31    300.65 o
   5   4   1     27.48    323.77    161.89 <
   6   4   1   1801.33   1433.85    208.14 o
   7   4   1   4933.28   4451.89    254.39 o
   8   4   1   7852.67   8603.13    393.15 o
   9   4   1    119.37   -185.01    323.77 <
  10   4   1  12186.80  12696.60    867.25 o
  11   4   1   1805.81   1838.57    578.17 o
  12   4   1    625.49    381.59    612.86 <
  13   4   1    613.21    323.77    693.80 <
 -13   5   1    188.91   -127.20   1029.14 <
 -12   5   1    484.10   -821.00    740.05 <
 -11   5   1   5868.26   5041.62    740.05 o
 -10   5   1   1407.55   1514.80    531.91 <
  -9   5   1    526.95   1399.16    450.97 o
  -8   5   1    750.12    543.48    265.96 <
  -7   5   1  12672.50  12661.90    462.53 o
  -6   5   1   4646.26   5226.63    300.65 o
  -5   5   1   2593.42   2289.54    208.14 o
  -4   5   1  21674.80  21692.80    485.66 o
  -3   5   1   9079.95   8209.97    265.96 o
  -2   5   1  22250.10  21623.50   1063.83 o
  -1   5   1   2752.52   3064.29    462.53 o
   0   5   1   1300.72   1029.14    381.59 <
   1   5   1  43078.70  41165.50   1561.05 o
   2   5   1    164.17     57.82    358.46 <
   3   5   1   9728.67   9123.48    335.34 o
   4   5   1  41374.20  40726.10    774.74 o
   5   5   1    534.10    589.73    185.01 o
   6   5   1  22053.80  23253.90    566.60 o
   7   5   1   5192.38   5030.05    300.65 o
   8   5   1    291.49    -69.38    312.21 <
   9   5   1  31499.40  32944.00   1352.91 o
  10   5   1    871.52    393.15    520.35 <
  11   5   1    602.27    670.67    578.17 <
  12   5   1   8738.36   9516.63    901.94 o
 -12   6   1   1507.17   1480.11    936.63 <
 -11   6   1   5811.56   3561.51   1029.14 o
 -10   6   1    213.93   -289.08    844.12 <
  -9   6   1   4960.57   4613.77    705.36 o
  -8   6   1   5734.93   5191.94    508.79 o
  -7   6   1   9301.40   9181.29    474.10 o
  -6   6   1     31.69    138.76    254.39 <
  -5   6   1    385.53    115.63    208.14 <
  -4   6   1   1645.09   1156.33    265.96 o
  -3   6   1  15003.10  14581.40    959.76 o
  -2   6   1  12091.10   9979.17    821.00 o
  -1   6   1  12487.10  14546.70    936.63 o
   0   6   1     62.18    231.27    450.97 <
   1   6   1  10147.60  10823.30    832.56 o
   2   6   1   9843.03   9435.69    786.31 o
   3   6   1     81.47    370.03    462.53 <
   4   6   1  11131.20  11505.50    497.22 o
   5   6   1    460.32    566.60    231.27 <
   6   6   1  15619.60  15911.20    566.60 o
   7   6   1    624.86    127.20    289.08 <
   8   6   1   2925.17   3203.05    462.53 o
   9   6   1    968.49     92.51    716.93 <
  10   6   1    834.29    913.50    809.43 <
  11   6   1   3023.88   3214.61   1017.57 o
  -9   7   1   1770.08   2231.73   1052.26 <
  -8   7   1  11217.20  10395.40   1503.23 o
  -7   7   1   1538.77   1618.87    705.36 <
  -6   7   1   5425.39   4868.17    578.17 o
  -5   7   1    581.72    936.63    589.73 <
  -4   7   1   4311.79   4035.61    716.93 o
  -3   7   1   4791.49   3954.66    705.36 o
  -2   7   1  23979.60  25023.10   1364.47 o
  -1   7   1   8290.25   9227.55    867.25 o
   0   7   1   6845.10   7446.79    797.87 o
   1   7   1    456.22     57.82    531.91 <
   2   7   1   1962.45   2058.27    589.73 o
   3   7   1  14671.70  14176.70   1075.39 o
   4   7   1    358.22    277.52    589.73 <
   5   7   1  15129.60  16211.80   1561.05 o
   6   7   1   2657.84   2266.42    959.76 <
   7   7   1  15270.30  15309.90   1179.46 o
   8   7   1     95.99   -115.63    670.67 <
  -8   8   1   4632.80   4139.68   1283.53 o
  -7   8   1   1063.91   1549.49   1075.39 <
  -6   8   1    860.97    439.41    728.49 <
  -5   8   1  38332.50  41015.20   1965.77 o
  -4   8   1   1522.99   2393.61    809.43 <
  -3   8   1    765.74    589.73    751.62 <
  -2   8   1   2710.65   2890.84    751.62 o
  -1   8   1   2861.88   4683.15    821.00 o
   0   8   1  25170.50  26237.20   1491.67 o
   1   8   1    379.07    948.19    693.80 <
   2   8   1  12143.00  10788.60   1063.83 o
   3   8   1  16182.90  16998.10   1271.97 o
   4   8   1   3583.59   4417.20    832.56 o
   5   8   1     37.68   -763.18    693.80 <
   6   8   1   1229.56   1110.08   1052.26 <
   7   8   1   5206.32   5504.15   1271.97 o
  -3   9   1    173.29    740.05   1075.39 <
  -2   9   1  11410.30  10938.90   1191.02 o
  -1   9   1   5235.64   6914.88   1029.14 o
   0   9   1    118.74      0.00    763.18 <
   1   9   1   6050.49   8406.55   1445.42 o
   2   9   1   5704.78   6394.53   1433.85 o
   3   9   1   9297.63   8822.83   1526.36 o
   4   9   1   8014.36   7377.41   1456.98 o
 -14   0   2  22035.30  19449.50   1746.06 o
 -13   0   2  21880.50  21762.20   1722.94 o
 -12   0   2   2970.86    670.67    705.36 <
 -11   0   2   2312.99   3122.10    751.62 o
 -10   0   2 148657.00 145698.00   5827.93 o
  -9   0   2  15428.10  16165.60    867.25 o
  -8   0   2    243.88    416.28    300.65 <
  -7   0   2   3548.40   3781.21    393.15 o
  -6   0   2  11330.60  11147.10    555.04 o
  -5   0   2 214212.00 215333.00   4509.70 o
  -4   0   2   4537.12   4660.03    300.65 o
  -3   0   2  92166.30  90726.00   1907.95 o
  -2   0   2  38603.70  40911.10    913.50 o
  -1   0   2  27744.70  27948.60    635.98 o
   0   0   2   3591.60   3469.00    161.89 o
   1   0   2  22583.20  22814.50    566.60 o
   2   0   2  95191.20  95813.90   2046.71 o
   3   0   2  75401.10  76329.60   1688.25 o
   4   0   2   6414.70   6891.75    300.65 o
   5   0   2 166207.00 162268.00   3457.44 o
   6   0   2   8620.21   8857.52    416.28 o
   7   0   2   8341.14   8371.86    427.84 o
   8   0   2    414.66    265.96    242.83 <
   9   0   2   7172.23   7678.06    543.48 o
  10   0   2 115854.00 118883.00   3480.57 o
  11   0   2   1026.88    346.90    751.62 <
  12   0   2    401.99    497.22    786.31 <
  13   0   2  15823.40  17876.90   1676.68 o
 -14   1   2     30.82    127.20    948.19 <
 -13   1   2   5481.49   4024.04    971.32 o
 -12   1   2   4736.82   4324.69    913.50 o
 -11   1   2  10967.30  13216.90   1214.15 o
 -10   1   2  16260.20  13182.20    647.55 o
  -9   1   2     80.38    381.59    370.03 <
  -8   1   2     46.33    265.96    265.96 <
  -7   1   2  88668.80  86008.10   2046.71 o
  -6   1   2  70833.30  69287.60   1665.12 o
  -5   1   2   2522.80   2312.67    219.70 o
  -4   1   2  11348.50  10592.00    474.10 o
  -3   1   2  58041.90  60221.90   1202.59 o
  -2   1   2 163975.00 172063.00   3098.98 o
  -1   1   2  53039.70  57319.50   1086.95 o
   0   1   2   3427.23   3098.98    323.77 o
   1   1   2  45575.30  44183.50    971.32 o
   2   1   2 158851.00 155365.00   2763.64 o
   3   1   2  43593.70  42495.30    867.25 o
   4   1   2  10882.00  10222.00    323.77 o
   5   1   2     13.90      0.00    196.58 <
   6   1   2  51971.60  49144.20   1260.40 o
   7   1   2  69027.70  66940.20   1665.12 o
   8   1   2   1014.45   1260.40    312.21 o
   9   1   2    251.14    -46.25    277.52 <
  10   1   2   9431.80   7643.37    566.60 o
  11   1   2   8468.01   8660.94    670.67 o
  12   1   2   3246.03   3607.76    982.88 o
  13   1   2   6415.74   7296.47   1295.09 o
 -14   2   2   5844.76   5457.90    867.25 o
 -13   2   2   1701.05   1722.94    647.55 <
 -12   2   2   1016.77    948.19    566.60 <
 -11   2   2   3297.50   3873.72    578.17 o
 -10   2   2   4789.85   4428.76    543.48 o
  -9   2   2  10841.60  10673.00    578.17 o
  -8   2   2    798.93    728.49    219.70 o
  -7   2   2     28.62     92.51    173.45 <
  -6   2   2  16399.70  16396.80    462.53 o
  -5   2   2   2651.22   2937.09    185.01 o
  -4   2   2   2207.06   2567.06    173.45 o
  -3   2   2   2100.25   2231.73    138.76 o
  -2   2   2   5826.90   6544.85    196.58 o
  -1   2   2  17656.20  18258.50    346.90 o
   0   2   2     46.89    104.07    115.63 <
   1   2   2   7370.51   7342.72    219.70 o
   2   2   2   2524.86   3075.85    127.20 o
   3   2   2   7339.53   8001.83    231.27 o
   4   2   2     30.87    231.27    104.07 <
   5   2   2   3138.38   3168.36    185.01 o
   6   2   2  21214.10  21773.80    497.22 o
   7   2   2   2157.69   2277.98    242.83 o
   8   2   2   3735.58   4047.17    381.59 o
   9   2   2   5320.52   5585.09    474.10 o
  10   2   2   3069.61   2682.70    450.97 o
  11   2   2   6538.85   6938.01    543.48 o
  12   2   2   1777.10   2139.22    670.67 o
  13   2   2   1618.88   1977.33    670.67 <
 -13   3   2   6332.75   6822.37    855.69 o
 -12   3   2   2758.51   3931.54    647.55 o
 -11   3   2   1095.21   1699.81    520.35 o
 -10   3   2    202.86    219.70    427.84 <
  -9   3   2    544.21    647.55    381.59 <
  -8   3   2  16564.30  15957.40    450.97 o
  -7   3   2  13885.50  13136.00    439.41 o
  -6   3   2    508.70    474.10    161.89 <
  -5   3   2  38592.90  40090.10    763.18 o
  -4   3   2   1925.99   1537.92    138.76 o
  -3   3   2   8905.59   9250.67    242.83 o
  -2   3   2   3384.35   3607.76    161.89 o
  -1   3   2   3866.98   3538.38    196.58 o
   0   3   2 104416.00 106845.00   1607.30 o
   1   3   2   2915.75   2775.20    185.01 o
   2   3   2    841.00    774.74    104.07 o
   3   3   2   5796.65   6070.75    208.14 o
   4   3   2   1335.29   1237.28    138.76 o
   5   3   2  34908.70  34042.50    612.86 o
   6   3   2   1042.90   1006.01    173.45 o
   7   3   2  11693.20  11551.80    358.46 o
   8   3   2  11779.60  12280.30    612.86 o
   9   3   2    390.85    659.11    346.90 <
  10   3   2    715.48   1191.02    404.72 <
  11   3   2    767.03    474.10    543.48 <
  12   3   2   2162.56   2139.22    716.93 <
  13   3   2   3867.93   4937.55    809.43 o
 -13   4   2   4221.78   2925.53    786.31 o
 -12   4   2   2248.18   2127.66    601.29 o
 -11   4   2    164.84   -150.32    508.79 <
 -10   4   2  38091.70  41732.10   1572.61 o
  -9   4   2    946.82    566.60    277.52 <
  -8   4   2   4390.50   3445.88    370.03 o
  -7   4   2   1640.19   1757.63    242.83 o
  -6   4   2    546.61    936.63    185.01 o
  -5   4   2  40293.10  40298.20    786.31 o
  -4   4   2   2685.07   2370.49    185.01 o
  -3   4   2  43167.90  42992.50    821.00 o
  -2   4   2  26558.10  26156.30    716.93 o
  -1   4   2   7525.50   7261.78    370.03 o
   0   4   2    287.51    555.04    150.32 o
   1   4   2   8560.10   8360.30    265.96 o
   2   4   2  24461.60  24364.00    670.67 o
   3   4   2  41319.20  42206.20    751.62 o
   4   4   2   4794.14   5538.84    265.96 o
   5   4   2  42048.50  43270.00    751.62 o
   6   4   2   1334.51   1376.04    185.01 o
   7   4   2    106.99    -23.13    196.58 <
   8   4   2   3098.96   3156.79    335.34 o
   9   4   2    650.62    878.81    312.21 <
  10   4   2  30437.60  36470.80   1526.36 o
  11   4   2      4.40    -69.38    566.60 <
  12   4   2   3943.78   4555.96    763.18 o
 -13   5   2   3799.93   2462.99   1052.26 <
 -12   5   2    124.00  -1248.84    740.05 <
 -11   5   2  21422.40  19553.60   1110.08 o
 -10   5   2   5338.53   5111.00    624.42 o
  -9   5   2   2462.45   2728.95    485.66 o
  -8   5   2     51.30   -219.70    265.96 <
  -7   5   2  30973.50  31729.80    774.74 o
  -6   5   2  45684.50  47132.20    982.88 o
  -5   5   2    339.69    208.14    185.01 <
  -4   5   2   1509.91   1341.35    185.01 o
  -3   5   2  33007.40  32018.90    693.80 o
  -2   5   2  84157.60  81787.50   2301.11 o
  -1   5   2   6193.03   4509.70    520.35 o
   0   5   2    594.22    358.46    358.46 <
   1   5   2   6765.01   6567.98    578.17 o
   2   5   2  70133.10  68570.60   1410.73 o
   3   5   2  30681.30  31521.70    878.81 o
   4   5   2   3187.98   3203.05    219.70 o
   5   5   2      2.74     23.13    173.45 <
   6   5   2  35131.10  36147.00    763.18 o
   7   5   2  24608.50  27000.40    601.29 o
   8   5   2     30.13    242.83    323.77 <
   9   5   2   4911.19   5226.63    659.11 o
  10   5   2   2847.30   3388.06    635.98 o
  11   5   2  17320.00  18882.90   1144.77 o
  12   5   2     39.10   -520.35    647.55 <
 -12   6   2    445.60   -115.63    901.94 <
 -11   6   2   9070.30   7146.15   1133.21 o
 -10   6   2   7734.37   6984.26   1017.57 o
  -9   6   2  19500.70  17691.90   1086.95 o
  -8   6   2     84.70   -404.72    416.28 <
  -7   6   2    933.93    740.05    312.21 <
  -6   6   2  41828.50  41905.60   1029.14 o
  -5   6   2   4740.33   4174.37    265.96 o
  -4   6   2    234.52    -34.69    265.96 <
  -3   6   2   1233.22   1295.09    474.10 <
  -2   6   2    513.83   1456.98    485.66 o
  -1   6   2  28768.40  32863.00   1456.98 o
   0   6   2    246.05   -346.90    439.41 <
   1   6   2  45760.90  45918.00   1792.32 o
   2   6   2     76.67   -219.70    427.84 <
   3   6   2    228.29    358.46    323.77 <
   4   6   2   1080.32    751.62    242.83 o
   5   6   2   7720.27   7169.27    462.53 o
   6   6   2  45206.20  47768.20   1063.83 o
   7   6   2     34.01      0.00    289.08 <
   8   6   2      9.03    740.05    370.03 <
   9   6   2  21839.80  23554.50   1641.99 o
  10   6   2   9398.54   7516.17   1121.64 o
  11   6   2   8986.00  10083.20   1271.97 o
  -9   7   2    250.89   1167.90   1052.26 <
  -8   7   2  14981.00  14488.90   1722.94 o
  -7   7   2   2384.44    971.32    925.07 <
  -6   7   2   9382.24   7400.54    740.05 o
  -5   7   2  19130.00  20467.10   1283.53 o
  -4   7   2    338.65    450.97    612.86 <
  -3   7   2  33245.70  34747.80   1641.99 o
  -2   7   2  21004.70  23832.10   1318.22 o
  -1   7   2   4134.61   3642.45    716.93 o
   0   7   2  28263.90  29660.00   1468.54 o
   1   7   2   5601.45   6047.63    751.62 o
   2   7   2  17235.30  17449.10   1133.21 o
   3   7   2  32707.10  34736.30   1641.99 o
   4   7   2    158.25    127.20    751.62 <
   5   7   2  15699.50  18674.80   1641.99 o
   6   7   2   8213.14   8695.63    936.63 o
   7   7   2    843.00   1237.28    647.55 <
   8   7   2  10525.40  12268.70   1075.39 o
  -7   8   2   4569.06   6810.81   1387.60 o
  -6   8   2     34.85   -439.41    740.05 <
  -5   8   2     89.69   1052.26    728.49 <
  -4   8   2   3124.58   2578.63    763.18 o
  -3   8   2   5370.78   4486.58    878.81 o
  -2   8   2      6.57    670.67    635.98 <
  -1   8   2   2836.27   3364.93    809.43 o
   0   8   2     44.78    138.76    682.24 <
   1   8   2   2377.82   2705.82    751.62 o
   2   8   2      3.52    601.29    647.55 <
   3   8   2   8432.95   8233.10    959.76 o
   4   8   2   3052.29   2890.84    832.56 o
   5   8   2     28.44   -150.32    948.19 <
   6   8   2    509.06   1214.15    982.88 <
  -2   9   2   2726.97   2382.05   1179.46 <
  -1   9   2   6500.60   6371.40   1480.11 o
   0   9   2   4650.34   2833.02   1156.33 <
   1   9   2   6547.11   4706.28   1283.53 o
   2   9   2   1650.91   2590.19   1214.15 <
   3   9   2    720.87    682.24   1167.90 <
   4   9   2  18437.60  17240.90   1896.39 o
   5   9   2   2294.63   2012.02   1156.33 <
 -14   1   3   1697.03   2624.88    994.45 <
 -13   1   3   3874.73   2902.40    948.19 o
 -12   1   3   1731.35   3307.12    844.12 o
 -11   1   3  15470.60  16304.30   1341.35 o
 -10   1   3   5318.99   5874.18    797.87 o
  -9   1   3  14849.10  14662.30    844.12 o
  -8   1   3  28949.40  29775.60    959.76 o
  -7   1   3  26797.90  26861.60    855.69 o
  -6   1   3   1056.10   1665.12    289.08 o
  -5   1   3   4681.52   5319.14    358.46 o
  -4   1   3  11391.40  12453.70    370.03 o
  -3   1   3  38276.40  39685.40    855.69 o
  -2   1   3  80186.10  84262.10   1607.30 o
  -1   1   3  26970.50  29752.50    740.05 o
   0   1   3    584.00    531.91    138.76 o
   1   1   3  16405.40  15356.10    416.28 o
   2   1   3   1349.54   1110.08    138.76 o
   3   1   3  32018.90  30989.80    612.86 o
   4   1   3  27847.10  27728.90    578.17 o
   5   1   3    130.64    265.96    150.32 <
   6   1   3  31045.50  30978.20    901.94 o
   7   1   3   8261.80   8406.55    450.97 o
   8   1   3   2339.91   2162.35    312.21 o
   9   1   3   1040.48   1006.01    300.65 o
  10   1   3    427.42     80.94    335.34 <
  11   1   3   3542.18   4370.94    589.73 o
  12   1   3   9021.62   7735.88   1191.02 o
  13   1   3   6528.35   5122.56   1156.33 o
 -14   2   3  21256.20  19877.40   1271.97 o
 -13   2   3   3087.41   2775.20    670.67 o
 -12   2   3   7157.46   6325.15    740.05 o
 -11   2   3  26620.70  28607.70   1271.97 o
 -10   2   3   3829.27   3098.98    485.66 o
  -9   2   3   2050.65   1676.68    404.72 o
  -8   2   3   5000.73   4798.79    300.65 o
  -7   2   3  17691.70  17680.40    508.79 o
  -6   2   3  51617.10  50485.60    844.12 o
  -5   2   3   1033.85   1364.47    173.45 o
  -4   2   3 134575.00 134435.00   2254.85 o
  -3   2   3    460.56    462.53    104.07 o
  -2   2   3   1288.69   1456.98    115.63 o
  -1   2   3   1581.12   1295.09    150.32 o
   0   2   3  32217.60  31001.30    959.76 o
   1   2   3 253078.00 233811.00   4787.22 o
   2   2   3  12143.30  12789.10    300.65 o
   3   2   3   4707.93   4833.48    173.45 o
   4   2   3 101097.00  99861.00   1572.61 o
   5   2   3  55403.50  54394.00    959.76 o
   6   2   3  36356.80  35025.40    705.36 o
   7   2   3     62.83    450.97    196.58 <
   8   2   3    163.72    462.53    300.65 <
   9   2   3  97135.70 101283.00   2474.56 o
  10   2   3  10900.50  10661.40    647.55 o
  11   2   3    279.60    797.87    416.28 <
  12   2   3   1673.55    948.19    693.80 <
  13   2   3   1860.25   1884.82    728.49 <
 -13   3   3   1029.96    497.22    659.11 <
 -12   3   3  26286.40  28203.00   1318.22 o
 -11   3   3  43424.50  46600.30   1734.50 o
 -10   3   3   5252.29   6047.63    624.42 o
  -9   3   3     17.55    635.98    370.03 <
  -8   3   3  33910.20  34065.60    786.31 o
  -7   3   3  95826.80  95964.20   1746.06 o
  -6   3   3  28956.70  28364.90    624.42 o
  -5   3   3     27.48    -46.25    127.20 <
  -4   3   3  10221.60  10811.70    335.34 o
  -3   3   3 138409.00 138795.00   2116.09 o
  -2   3   3  60498.00  58533.60    971.32 o
  -1   3   3    758.25    716.93    138.76 o
   0   3   3      9.90    104.07     92.51 <
   1   3   3  51122.20  48681.70   1144.77 o
   2   3   3  78785.20  77682.50   1503.23 o
   3   3   3    212.95    277.52    115.63 <
   4   3   3  17157.70  17275.60    381.59 o
   5   3   3   3980.35   3943.10    196.58 o
   6   3   3  30002.60  30642.90    647.55 o
   7   3   3     64.75     69.38    185.01 <
   8   3   3  21274.70  22236.30    832.56 o
   9   3   3   7448.87   6429.22    508.79 o
  10   3   3   2149.97   2092.97    427.84 o
  11   3   3    421.44    855.69    589.73 <
  12   3   3  15395.50  17391.30   1156.33 o
 -13   4   3    215.92  -1029.14    821.00 <
 -12   4   3      6.04    323.77    543.48 <
 -11   4   3    410.24   1029.14    485.66 <
 -10   4   3   9431.96  10129.50    751.62 o
  -9   4   3   1193.94    705.36    277.52 <
  -8   4   3  14341.40  14118.80    531.91 o
  -7   4   3   2247.72   2035.15    254.39 o
  -6   4   3     22.70    173.45    185.01 <
  -5   4   3   2814.23   2636.44    219.70 o
  -4   4   3  14680.20  15460.20    427.84 o
  -3   4   3  52124.40  49791.80    948.19 o
  -2   4   3    530.32    277.52    173.45 <
  -1   4   3   7791.34   7701.19    254.39 o
   0   4   3  69744.80  67703.40   1086.95 o
   1   4   3  18758.30  19125.80    566.60 o
   2   4   3  29795.40  31197.90    832.56 o
   3   4   3   6530.96   6487.04    277.52 o
   4   4   3  17360.10  18166.00    416.28 o
   5   4   3  79148.90  82435.10   1271.97 o
   6   4   3  12160.50  11852.40    346.90 o
   7   4   3   3334.93   2879.27    242.83 o
   8   4   3  23418.60  23728.00    740.05 o
   9   4   3  14123.30  13401.90    705.36 o
  10   4   3  21304.50  21831.60   1144.77 o
  11   4   3   1420.49    959.76    624.42 <
  12   4   3    112.80   -705.36    670.67 <
 -13   5   3    128.10   -358.46    948.19 <
 -12   5   3   7888.96   7088.33    844.12 o
 -11   5   3   2714.87    601.29    601.29 <
 -10   5   3   1779.02   1202.59    497.22 <
  -9   5   3  26408.40  25057.80   1075.39 o
  -8   5   3    288.07    346.90    277.52 <
  -7   5   3   6695.07   6394.53    358.46 o
  -6   5   3  26884.70  27856.10    682.24 o
  -5   5   3   2069.98   1873.26    208.14 o
  -4   5   3  31704.70  32065.10    693.80 o
  -3   5   3   4560.74   4902.86    335.34 o
  -2   5   3     96.76    138.76    161.89 <
  -1   5   3  49203.80  52139.10   1699.81 o
   0   5   3    382.89    312.21    173.45 <
   1   5   3    342.79    474.10    150.32 o
   2   5   3  11981.30  11956.50    601.29 o
   3   5   3   3329.86   3133.67    393.15 o
   4   5   3  18754.10  19310.80    485.66 o
   5   5   3     54.96   -104.07    196.58 <
   6   5   3   6775.14   6567.98    289.08 o
   7   5   3   6424.26   6382.97    312.21 o
   8   5   3   1163.52   1086.95    370.03 <
   9   5   3    301.84    115.63    485.66 <
  10   5   3     64.50   -867.25    555.04 <
  11   5   3   6260.43   7539.30    832.56 o
  12   5   3    313.68    265.96    659.11 <
 -12   6   3   3208.32   1618.87    901.94 <
 -11   6   3   3993.04   3758.09    959.76 o
 -10   6   3   2256.91    173.45    774.74 <
  -9   6   3   1099.16   -716.93    589.73 <
  -8   6   3   3732.45   3179.92    462.53 o
  -7   6   3    750.96    393.15    312.21 <
  -6   6   3  17454.60  17530.00    601.29 o
  -5   6   3   1229.11   1352.91    219.70 o
  -4   6   3   9244.84   7805.26    439.41 o
  -3   6   3     72.98    439.41    323.77 <
  -2   6   3   9249.47  10060.10    821.00 o
  -1   6   3  13308.90  13795.10    925.07 o
   0   6   3    278.29    150.32    439.41 <
   1   6   3  12548.20  13575.40    901.94 o
   2   6   3  12575.30  11551.80   1121.64 o
   3   6   3  14281.80  14431.10    450.97 o
   4   6   3    249.46    277.52    265.96 <
   5   6   3    227.44    335.34    370.03 <
   6   6   3     59.26    289.08    323.77 <
   7   6   3   8787.50   9320.05    543.48 o
   8   6   3   3866.35   4602.21    716.93 o
   9   6   3   3898.65   3330.24    682.24 o
  10   6   3     72.55    300.65    670.67 <
  11   6   3   3251.91   3075.85   1006.01 o
  -9   7   3    905.47   -173.45   1040.70 <
  -8   7   3    179.88    508.79   1075.39 <
  -7   7   3  17556.40  17668.80   1803.88 o
  -6   7   3   1077.14    624.42    462.53 <
  -5   7   3  15630.30  13691.00   1098.52 o
  -4   7   3    445.36    543.48    589.73 <
  -3   7   3  16577.70  17749.70   1179.46 o
  -2   7   3   3112.84   4336.25    716.93 o
  -1   7   3   2522.58   2104.53    589.73 o
   0   7   3   6439.72   5446.33    763.18 o
   1   7   3   9017.49  10210.40    901.94 o
   2   7   3  22110.80  24618.40   1341.35 o
   3   7   3   3870.38   3179.92    832.56 o
   4   7   3   7668.44   8857.52   1202.59 o
   5   7   3    208.57    427.84    624.42 <
   6   7   3   8141.72   9817.28    959.76 o
   7   7   3   2771.38   3515.26    763.18 o
   8   7   3  11606.00  12049.00   1641.99 o
  -7   8   3   3166.01   3145.23   1191.02 <
  -6   8   3    639.74    104.07    728.49 <
  -5   8   3      5.12   1052.26    786.31 <
  -4   8   3   6586.79   6302.02    971.32 o
  -3   8   3  17888.30  18859.80   1329.78 o
  -2   8   3   8545.80   8452.80    982.88 o
  -1   8   3    109.14   -786.31    682.24 <
   0   8   3  24449.70  25450.90   1480.11 o
   1   8   3   5370.79   4209.06    763.18 o
   2   8   3   4496.51   5342.26    855.69 o
   3   8   3    767.34   -150.32    867.25 <
   4   8   3   1204.73   -150.32    878.81 <
   5   8   3  35005.20  39766.30   1907.95 o
  -2   9   3   3234.72   4660.03   1341.35 o
  -1   9   3   4274.49   4960.67   1271.97 o
   0   9   3    167.53  -1214.15   1040.70 <
   1   9   3   4211.86   3723.40   1179.46 o
   2   9   3  10589.90   7018.95   1399.16 o
   3   9   3   1132.66    982.88   1075.39 <
   4   9   3     11.86    323.77   1063.83 <
 -14   0   4   1918.52    265.96    901.94 <
 -13   0   4  35193.50  37985.60   2312.67 o
 -12   0   4    415.51   1445.42    763.18 <
 -11   0   4    265.52    104.07    670.67 <
 -10   0   4   2422.01   2451.43    682.24 o
  -9   0   4  30158.70  27023.50   1607.30 o
  -8   0   4 105111.00 108083.00   3087.41 o
  -7   0   4  10871.80  10811.70    612.86 o
  -6   0   4     48.93    138.76    242.83 <
  -5   0   4 189844.00 193536.00   4012.48 o
  -4   0   4  62987.70  64893.50   1456.98 o
  -3   0   4  53942.50  53711.70    959.76 o
  -2   0   4    461.28    497.22    115.63 o
  -1   0   4  18484.70  19206.70    531.91 o
   0   0   4 594492.00 598102.00  11956.50 o
   1   0   4  16460.70  16662.80    485.66 o
   2   0   4    160.04    254.39    115.63 <
   3   0   4  46402.20  47398.10   1179.46 o
   4   0   4  55951.50  56463.80   1399.16 o
   5   0   4 107877.00 106545.00   2416.74 o
   6   0   4    192.46    323.77    231.27 <
   7   0   4   9452.27   9470.38    497.22 o
   8   0   4  52474.10  53376.40   1757.63 o
   9   0   4  17239.80  16130.90    682.24 o
  10   0   4    263.19    531.91    335.34 <
  11   0   4   1074.30   1237.28    809.43 <
  12   0   4   2034.84   2405.18    971.32 <
 -14   1   4   1098.07    786.31    925.07 <
 -13   1   4   4830.64   4590.65   1063.83 o
 -12   1   4  28842.10  32365.80   2012.02 o
 -11   1   4  17763.50  17310.30   1387.60 o
 -10   1   4   4107.14   3515.26    740.05 o
  -9   1   4   5942.22   4740.97    393.15 o
  -8   1   4  33965.50  34111.90   1052.26 o
  -7   1   4  14603.40  14327.00    716.93 o
  -6   1   4   1847.65   2185.47    323.77 o
  -5   1   4  18578.70  18512.90    497.22 o
  -4   1   4  36621.40  40136.40    867.25 o
  -3   1   4  69272.80  70848.60   1630.43 o
  -2   1   4  26662.50  28226.10    647.55 o
  -1   1   4  13435.40  13193.80    427.84 o
   0   1   4   1545.00   1757.63    161.89 o
   1   1   4  10647.90  10765.50    381.59 o
   2   1   4      8.89     23.13    115.63 <
   3   1   4 106581.00 105041.00   1734.50 o
   4   1   4  30747.80  30966.60    728.49 o
   5   1   4   3969.61   3839.03    242.83 o
   6   1   4   3945.26   4000.92    265.96 o
   7   1   4  28949.30  29509.70    797.87 o
   8   1   4  52870.00  51133.10   1387.60 o
   9   1   4   8669.64   7308.03    485.66 o
  10   1   4   1464.75   1052.26    358.46 <
  11   1   4  14944.70  15656.80    925.07 o
  12   1   4  30243.30  33429.60   2197.04 o
 -14   2   4    103.49    404.72    728.49 <
 -13   2   4   1633.02   1156.33    612.86 <
 -12   2   4   3857.28   4024.04    659.11 o
 -11   2   4     92.48    855.69    450.97 <
 -10   2   4   1718.84   1318.22    450.97 <
  -9   2   4   8905.29   9840.40    693.80 o
  -8   2   4   7373.08   7308.03    358.46 o
  -7   2   4   7125.15   7065.20    323.77 o
  -6   2   4   3765.10   3492.13    265.96 o
  -5   2   4   7896.80   8475.93    300.65 o
  -4   2   4  25761.90  26295.00    555.04 o
  -3   2   4  23345.10  25023.10    520.35 o
  -2   2   4  10156.40  11043.00    312.21 o
  -1   2   4  31370.70  32747.40    844.12 o
   0   2   4  14077.20  14246.00    578.17 o
   1   2   4  21876.10  20814.00    508.79 o
   2   2   4  11447.40  11655.90    277.52 o
   3   2   4   4519.95   4370.94    161.89 o
   4   2   4  26497.30  25601.20    531.91 o
   5   2   4   7237.20   7481.48    277.52 o
   6   2   4   1308.26   1179.46    208.14 o
   7   2   4   3398.09   3538.38    277.52 o
   8   2   4   2409.92   2092.97    358.46 o
   9   2   4   6383.59   6995.82    520.35 o
  10   2   4    345.26    508.79    323.77 <
  11   2   4    724.71    659.11    450.97 <
  12   2   4    586.68   1271.97    670.67 <
 -13   3   4   3697.60   2636.44    682.24 o
 -12   3   4   1103.50    936.63    566.60 <
 -11   3   4   1949.23   2092.97    531.91 o
 -10   3   4  21270.60  22964.80   1086.95 o
  -9   3   4     20.80     92.51    358.46 <
  -8   3   4    175.98    -23.13    254.39 <
  -7   3   4    188.96    300.65    196.58 <
  -6   3   4   3545.46   2833.02    231.27 o
  -5   3   4  35438.60  34447.20    763.18 o
  -4   3   4    152.94    300.65    138.76 <
  -3   3   4  23309.90  24017.10    520.35 o
  -2   3   4  17643.10  17067.50    508.79 o
  -1   3   4    422.60    670.67    173.45 o
   0   3   4     47.37     23.13    104.07 <
   1   3   4   1433.64   1283.53    161.89 o
   2   3   4  17876.90  17402.80    497.22 o
   3   3   4  12682.50  12014.30    312.21 o
   4   3   4   3677.76   3515.26    173.45 o
   5   3   4  19294.70  20120.20    474.10 o
   6   3   4   5678.90   5087.87    265.96 o
   7   3   4   1726.98   2185.47    277.52 o
   8   3   4    660.12   1086.95    335.34 o
   9   3   4   1531.24   1514.80    381.59 o
  10   3   4  15703.10  18478.20   1075.39 o
  11   3   4   1061.46    913.50    601.29 <
  12   3   4    952.38    913.50    682.24 <
 -13   4   4  11624.40  11632.70    994.45 o
 -12   4   4    878.87    439.41    543.48 <
 -11   4   4    818.37    994.45    508.79 <
 -10   4   4    977.63   1029.14    474.10 <
  -9   4   4   7954.96   8892.21    624.42 o
  -8   4   4  28061.70  28110.50    740.05 o
  -7   4   4  16394.80  16512.50    520.35 o
  -6   4   4   2879.60   3283.99    265.96 o
  -5   4   4  27945.10  28654.00    612.86 o
  -4   4   4  10842.10  10175.70    358.46 o
  -3   4   4   5376.43   4671.59    231.27 o
  -2   4   4   9729.03   9412.56    393.15 o
  -1   4   4    749.32    878.81    161.89 o
   0   4   4 123937.00 118339.00   1977.33 o
   1   4   4    951.15    601.29    173.45 o
   2   4   4   8050.27   7793.69    346.90 o
   3   4   4   4159.45   4209.06    277.52 o
   4   4   4   5961.21   6174.83    254.39 o
   5   4   4  32091.40  33903.70    612.86 o
   6   4   4   1046.18   1237.28    185.01 o
   7   4   4  18287.30  17865.40    693.80 o
   8   4   4  16008.40  16928.70    612.86 o
   9   4   4   3492.50   2856.15    450.97 o
  10   4   4     71.19    173.45    543.48 <
  11   4   4   1273.48   1376.04    647.55 <
  12   4   4   3007.14   3815.90    797.87 o
 -13   5   4   4282.50   3087.41   1029.14 o
 -12   5   4  22004.70  20432.40   1179.46 o
 -11   5   4   4174.38   2752.08    647.55 o
 -10   5   4    875.73    427.84    474.10 <
  -9   5   4     34.35    219.70    404.72 <
  -8   5   4  25515.90  24410.20    705.36 o
  -7   5   4  27504.70  28145.20    728.49 o
  -6   5   4   5775.18   5249.76    312.21 o
  -5   5   4   4079.62   3515.26    254.39 o
  -4   5   4  12493.90  12268.70    450.97 o
  -3   5   4  32133.40  32504.60    936.63 o
  -2   5   4     34.80     69.38    173.45 <
  -1   5   4  32519.90  31695.10    612.86 o
   0   5   4    612.91    589.73    138.76 o
   1   5   4  21590.50  21438.40    485.66 o
   2   5   4    217.40     34.69    208.14 <
   3   5   4  29941.70  31857.00    832.56 o
   4   5   4  21050.70  22271.00    670.67 o
   5   5   4    309.46    219.70    219.70 <
   6   5   4   1992.99   1977.33    242.83 o
   7   5   4  17457.10  17772.90    797.87 o
   8   5   4  29495.70  28769.60   1075.39 o
   9   5   4    622.02    832.56    450.97 <
  10   5   4    318.03     57.82    589.73 <
  11   5   4   4631.14   4197.49    774.74 o
 -12   6   4   5830.36   5955.12   1086.95 o
 -11   6   4   5536.12   3018.03    925.07 o
 -10   6   4   2984.96   1676.68    751.62 <
  -9   6   4  31042.90  31082.30   1480.11 o
  -8   6   4   3560.24   3272.43    485.66 o
  -7   6   4   5830.61   4960.67    404.72 o
  -6   6   4    644.68    693.80    289.08 <
  -5   6   4  17080.40  16801.50    682.24 o
  -4   6   4  83702.90  79185.80   1896.39 o
  -3   6   4   1113.87    682.24    346.90 <
  -2   6   4   1752.39   1399.16    265.96 o
  -1   6   4  43755.50  43154.40   1734.50 o
   0   6   4  22321.20  23762.70   1214.15 o
   1   6   4  50084.40  53561.40   2728.95 o
   2   6   4    133.30    -80.94    161.89 <
   3   6   4    720.96    635.98    231.27 <
   4   6   4  67698.90  71993.40   1884.82 o
   5   6   4  10707.60  10615.10    647.55 o
   6   6   4    254.89    242.83    381.59 <
   7   6   4   1602.29   1364.47    450.97 o
   8   6   4   1937.87   2659.57    659.11 o
   9   6   4  18686.40  19253.00   1214.15 o
  10   6   4    420.80     34.69    659.11 <
  -9   7   4    284.89    185.01   1052.26 <
  -8   7   4   6999.82   6556.42   1318.22 o
  -7   7   4  10732.10   6961.13   1387.60 o
  -6   7   4   1096.21   1283.53    566.60 <
  -5   7   4   7083.48   6221.08    589.73 o
  -4   7   4   1129.29    728.49    635.98 <
  -3   7   4    621.76    566.60    566.60 <
  -2   7   4   7912.02   9354.75    901.94 o
  -1   7   4   7358.83   8603.13    855.69 o
   0   7   4    370.13    289.08    555.04 <
   1   7   4   1783.37   1537.92    855.69 <
   2   7   4  10807.20  10117.90   1260.40 o
   3   7   4    475.99    173.45    612.86 <
   4   7   4   2861.30   2012.02    659.11 o
   5   7   4   8152.40   7053.64    844.12 o
   6   7   4    247.14    300.65    589.73 <
   7   7   4  12569.60  11771.50   1653.56 o
   8   7   4   7063.43   7065.20   1364.47 o
  -6   8   4   8738.71   7469.92    994.45 o
  -5   8   4   2275.45   2162.35    751.62 <
  -4   8   4   1731.06   1907.95    763.18 <
  -3   8   4   7559.72   7516.17    982.88 o
  -2   8   4  15510.40  15992.10   1237.28 o
  -1   8   4   5835.84   4359.38    786.31 o
   0   8   4    378.83   1329.78    682.24 <
   1   8   4   5053.19   6394.53    890.38 o
   2   8   4  12377.50  10476.40   1399.16 o
   3   8   4   5435.07   5076.31   1110.08 o
   4   8   4     34.65   -196.58    682.24 <
   5   8   4    950.24    358.46   1086.95 <
  -2   9   4    952.84   1572.61   1075.39 <
  -1   9   4   9476.16   9158.17   1514.80 o
   0   9   4     58.03   -173.45    971.32 <
   1   9   4  14329.40  16385.30   1803.88 o
   2   9   4     24.77  -1283.53   1040.70 <
 -14   1   5   4474.07   4983.80   1098.52 o
 -13   1   5   4655.71   2902.40    982.88 <
 -12   1   5   8252.33   8903.77   1110.08 o
 -11   1   5   6103.59   9528.20   1075.39 o
 -10   1   5    326.52    728.49    543.48 <
  -9   1   5    240.51     23.13    277.52 <
  -8   1   5   1704.94   1919.52    277.52 o
  -7   1   5   3805.81   3711.83    300.65 o
  -6   1   5  48049.40  47664.10   1075.39 o
  -5   1   5   3500.94   3411.19    208.14 o
  -4   1   5  18438.60  18466.70    450.97 o
  -3   1   5  33878.50  36308.90    728.49 o
  -2   1   5   6387.83   6729.87    277.52 o
  -1   1   5  53994.70  56452.20   1156.33 o
   0   1   5   8094.06   7944.02    323.77 o
   1   1   5  10957.40  10673.00    404.72 o
   2   1   5  71808.60  69992.90   1618.87 o
   3   1   5  47481.80  46126.20    901.94 o
   4   1   5    656.34    774.74    173.45 o
   5   1   5   4541.88   4451.89    265.96 o
   6   1   5    169.68    370.03    173.45 <
   7   1   5  27416.80  27809.80    878.81 o
   8   1   5  25006.40  23415.80    821.00 o
   9   1   5   6878.23   5296.01    497.22 o
  10   1   5   1688.49   1884.82    393.15 o
  11   1   5   8949.44   9158.17    774.74 o
  12   1   5   1379.18    555.04    925.07 <
 -14   2   5  27755.60  32678.00   1595.74 o
 -13   2   5   5880.60   4717.84    728.49 o
 -12   2   5   3548.82   2786.77    612.86 o
 -11   2   5    326.41   1110.08    474.10 <
 -10   2   5  14523.60  16304.30    901.94 o
  -9   2   5 129002.00 131475.00   3746.52 o
  -8   2   5    166.51    543.48    242.83 <
  -7   2   5    882.73    878.81    196.58 o
  -6   2   5  49955.10  48727.90    901.94 o
  -5   2   5  48543.90  48242.30    901.94 o
  -4   2   5  97444.70  98392.50   1607.30 o
  -3   2   5   1333.40   1445.42    161.89 o
  -2   2   5   8747.55   8996.28    393.15 o
  -1   2   5 192328.00 194391.00   3573.07 o
   0   2   5  34305.50  32909.30    774.74 o
   1   2   5   3379.33   3457.44    196.58 o
   2   2   5    478.59    497.22    127.20 o
   3   2   5   3155.40   2520.81    185.01 o
   4   2   5  75222.80  71785.20   1225.71 o
   5   2   5     63.90    231.27    161.89 <
   6   2   5  66274.90  65622.00   1271.97 o
   7   2   5   2871.00   2844.58    358.46 o
   8   2   5   2094.24   1641.99    358.46 o
   9   2   5     45.54    185.01    277.52 <
  10   2   5   6950.84   8105.90    705.36 o
  11   2   5  25608.50  25335.30   1052.26 o
  12   2   5   1785.69   1815.44    716.93 <
 -13   3   5  11049.80  11494.00    994.45 o
 -12   3   5  12043.00  12060.60    890.38 o
 -11   3   5   3633.57   3792.78    612.86 o
 -10   3   5   6766.91   5550.40    601.29 o
  -9   3   5   2001.86   2335.80    450.97 o
  -8   3   5  12179.90  10834.90    393.15 o
  -7   3   5   1224.03   1433.85    254.39 o
  -6   3   5  55243.80  55677.50   1144.77 o
  -5   3   5  11897.40  12765.90    393.15 o
  -4   3   5  12510.90  12974.10    381.59 o
  -3   3   5   5528.87   5030.05    242.83 o
  -2   3   5  86290.20  89396.20   2035.15 o
  -1   3   5  75067.70  75844.00   1769.19 o
   0   3   5   3768.29   3237.74    196.58 o
   1   3   5    605.07    578.17    150.32 o
   2   3   5  83305.80  82539.10   1480.11 o
   3   3   5 114145.00 113737.00   1803.88 o
   4   3   5  11847.80  12118.40    335.34 o
   5   3   5    593.58    485.66    173.45 <
   6   3   5  16554.10  16859.40    462.53 o
   7   3   5  70812.00  72270.90   1561.05 o
   8   3   5  22483.80  23693.30    867.25 o
   9   3   5    180.24    242.83    370.03 <
  10   3   5   2019.73   1283.53    589.73 <
  11   3   5  25070.70  26179.40   1075.39 o
  12   3   5  13436.60  13540.70   1110.08 o
 -13   4   5  17904.50  18443.50   1179.46 o
 -12   4   5    305.45   -265.96    566.60 <
 -11   4   5   5246.21   4521.27    647.55 o
 -10   4   5  28128.90  30365.30   1271.97 o
  -9   4   5  13607.70  13552.20    797.87 o
  -8   4   5  26277.90  25901.90    809.43 o
  -7   4   5   1629.08   1561.05    254.39 o
  -6   4   5  13324.50  13367.20    462.53 o
  -5   4   5  78359.60  78237.60   1480.11 o
  -4   4   5   8182.94   7944.02    323.77 o
  -3   4   5   2430.64   2428.30    265.96 o
  -2   4   5  14459.40  13957.00    531.91 o
  -1   4   5  23118.80  22190.10    589.73 o
   0   4   5  48137.60  47190.00    913.50 o
   1   4   5     50.11     11.56    173.45 <
   2   4   5   8011.96   7759.00    346.90 o
   3   4   5  24150.90  25196.50    612.86 o
   4   4   5   5668.46   5966.69    277.52 o
   5   4   5     10.32    173.45    185.01 <
   6   4   5   2018.56   2069.84    254.39 o
   7   4   5   6928.98   7111.46    381.59 o
   8   4   5   5170.27   4868.17    474.10 o
   9   4   5     18.60   -913.50    531.91 <
  10   4   5  10380.20   9771.02    901.94 o
  11   4   5   2311.01   1711.37    705.36 <
 -13   5   5    151.82  -1537.92   1040.70 <
 -12   5   5   1002.80    -57.82    670.67 <
 -11   5   5   7486.85   7319.60    751.62 o
 -10   5   5   1258.85   1387.60    497.22 <
  -9   5   5     13.82   -242.83    393.15 <
  -8   5   5    260.25    173.45    312.21 <
  -7   5   5  11386.70  10129.50    520.35 o
  -6   5   5   2815.57   2439.87    265.96 o
  -5   5   5   1255.57   1352.91    231.27 o
  -4   5   5  25078.40  24005.50    821.00 o
  -3   5   5   3901.09   3804.34    335.34 o
  -2   5   5  13849.10  13841.30    462.53 o
  -1   5   5   4236.69   3966.23    219.70 o
   0   5   5    757.60    601.29    150.32 o
   1   5   5  37326.60  38390.30    740.05 o
   2   5   5    771.20    716.93    231.27 o
   3   5   5   2582.60   2520.81    289.08 o
   4   5   5  26287.50  26873.20    774.74 o
   5   5   5    415.95    578.17    277.52 <
   6   5   5  15608.60  15807.10    543.48 o
   7   5   5   4881.29   3642.45    485.66 o
   8   5   5    110.42    439.41    427.84 <
   9   5   5  19372.60  20143.30    948.19 o
  10   5   5   1157.67    821.00    520.35 <
  11   5   5    243.76    358.46    555.04 <
 -12   6   5   1097.97    740.05    867.25 <
 -11   6   5   8587.78   7631.81   1086.95 o
 -10   6   5    745.89   1931.08    740.05 <
  -9   6   5   4703.66   3573.07    682.24 o
  -8   6   5   4121.79   3908.41    508.79 o
  -7   6   5   8893.27   8071.21    474.10 o
  -6   6   5     92.45    323.77    289.08 <
  -5   6   5    246.61    358.46    254.39 <
  -4   6   5   1767.09   1746.06    312.21 o
  -3   6   5   8842.68   8163.72    439.41 o
  -2   6   5  10077.00   8996.28    323.77 o
  -1   6   5   6393.22   5596.66    231.27 o
   0   6   5    529.99    427.84    161.89 <
   1   6   5   4736.82   4648.46    231.27 o
   2   6   5   4707.11   4498.14    254.39 o
   3   6   5    158.58   -196.58    277.52 <
   4   6   5   8335.86   7654.93    555.04 o
   5   6   5     75.64    -69.38    312.21 <
   6   6   5  10904.30  10256.70    878.81 o
   7   6   5    454.64    289.08    832.56 <
   8   6   5   1799.20   1607.30    936.63 <
   9   6   5    424.85    277.52    635.98 <
  10   6   5    222.99    485.66    901.94 <
  -9   7   5    868.40    185.01   1110.08 <
  -8   7   5  17305.90  16292.80   1861.70 o
  -7   7   5    471.90   -358.46    959.76 <
  -6   7   5   7731.79   6741.43    716.93 o
  -5   7   5    755.04    890.38    497.22 <
  -4   7   5   4271.44   3179.92    485.66 o
  -3   7   5   8921.86   9377.87    936.63 o
  -2   7   5  19064.30  20513.40   1248.84 o
  -1   7   5  12017.20  14639.20   1052.26 o
   0   7   5   7143.78   8105.90   1144.77 o
   1   7   5   1440.69   2092.97    855.69 <
   2   7   5   1342.24   1838.57    601.29 o
   3   7   5  13485.10  14130.40   1040.70 o
   4   7   5   1137.61    543.48    555.04 <
   5   7   5   9500.92   8880.65    890.38 o
   6   7   5    367.59    809.43   1017.57 <
   7   7   5  11452.20  11655.90   1618.87 o
  -6   8   5    116.25   -185.01    740.05 <
  -5   8   5  37200.20  39326.90   1942.64 o
  -4   8   5   2077.97   2058.27    763.18 <
  -3   8   5    397.51    -57.82    705.36 <
  -2   8   5   1517.28   1306.66    693.80 <
  -1   8   5   1445.67   1861.70    693.80 <
   0   8   5  21535.20  23924.60   1445.42 o
   1   8   5    124.68   -566.60    925.07 <
   2   8   5   8926.11  10302.90   1040.70 o
   3   8   5  11638.80  12245.60   1121.64 o
   4   8   5   1770.16   2520.81   1144.77 <
  -2   9   5  14215.70  10187.30   1584.18 o
  -1   9   5   5808.13   7203.96   1422.29 o
   0   9   5     52.86   -323.77   1121.64 <
   1   9   5   4683.47   4891.29   1248.84 o
 -14   0   6  15651.00  12997.20   1514.80 o
 -13   0   6  19406.70  19148.90   1641.99 o
 -12   0   6   1677.00   1931.08    844.12 <
 -11   0   6   1156.99   1456.98    693.80 <
 -10   0   6 117976.00 127717.00   5249.76 o
  -9   0   6  10229.90  10592.00   1040.70 o
  -8   0   6   2230.78   1329.78    335.34 o
  -7   0   6   8822.88   8695.63    508.79 o
  -6   0   6   2526.48   2370.49    300.65 o
  -5   0   6  97468.00  99537.30   2312.67 o
  -4   0   6   3211.45   3469.00    289.08 o
  -3   0   6  97813.40  99363.80   1931.08 o
  -2   0   6  38380.50  37511.50    982.88 o
  -1   0   6   8239.61   8013.40    427.84 o
   0   0   6  11639.10  12291.80    520.35 o
   1   0   6  25536.80  24121.10    682.24 o
   2   0   6  94074.30  92472.10   2058.27 o
   3   0   6  33112.90  30666.00    740.05 o
   4   0   6    260.53    289.08    173.45 <
   5   0   6 164443.00 151630.00   3411.19 o
   6   0   6  12056.40  12153.10    705.36 o
   7   0   6   3701.98   3549.95    358.46 o
   8   0   6    111.57     11.56    289.08 <
   9   0   6   6532.30   5365.39    578.17 o
  10   0   6  83842.20  87222.30   2717.39 o
  11   0   6   2231.19   2428.30    925.07 <
  12   0   6    280.22   -716.93   1040.70 <
 -14   1   6     60.88   1179.46    901.94 <
 -13   1   6   3478.03   2567.06    994.45 <
 -12   1   6   8596.16   9366.31   1167.90 o
 -11   1   6  16697.50  14049.50   1283.53 o
 -10   1   6  16575.00  15425.50   1260.40 o
  -9   1   6      9.48    346.90    323.77 <
  -8   1   6    300.68    104.07    219.70 <
  -7   1   6  99937.90 103029.00   2069.84 o
  -6   1   6  85137.30  88054.90   1792.32 o
  -5   1   6   1334.98   1110.08    173.45 o
  -4   1   6   6368.59   6510.16    265.96 o
  -3   1   6  51984.20  54995.30    971.32 o
  -2   1   6 167331.00 172687.00   2867.71 o
  -1   1   6  65980.60  66651.10   1364.47 o
   0   1   6  10430.40  10464.80    300.65 o
   1   1   6  34725.70  33186.80    763.18 o
   2   1   6 121817.00 117599.00   2613.32 o
   3   1   6  34592.90  32284.90    797.87 o
   4   1   6   6386.22   5689.17    277.52 o
   5   1   6   3606.05   3503.69    254.39 o
   6   1   6  29067.10  29775.60    774.74 o
   7   1   6  45658.30  43836.60   1063.83 o
   8   1   6    674.55    774.74    300.65 <
   9   1   6    632.11    520.35    335.34 <
  10   1   6   2368.87   1237.28    508.79 <
  11   1   6   5506.45   5296.01    693.80 o
  12   1   6   2346.23   1861.70    994.45 <
 -14   2   6   6999.50   6683.61    913.50 o
 -13   2   6    925.11    173.45    578.17 <
 -12   2   6    866.04    612.86    520.35 <
 -11   2   6   4715.23   3839.03    589.73 o
 -10   2   6   2006.22   1850.13    485.66 o
  -9   2   6  10529.90  10811.70    485.66 o
  -8   2   6    245.11    555.04    300.65 <
  -7   2   6    730.43   1040.70    196.58 o
  -6   2   6  17658.00  17275.60    450.97 o
  -5   2   6    241.88    323.77    173.45 <
  -4   2   6     12.40     92.51    161.89 <
  -3   2   6    783.34    797.87    150.32 o
  -2   2   6   2834.90   3399.62    219.70 o
  -1   2   6  10024.20  10268.20    346.90 o
   0   2   6    334.83    323.77    138.76 <
   1   2   6  13947.00  13702.60    416.28 o
   2   2   6   1950.34   2486.12    219.70 o
   3   2   6   1725.76   1410.73    208.14 o
   4   2   6   1310.86   1306.66    196.58 o
   5   2   6   3171.98   3087.41    231.27 o
   6   2   6  17096.10  17240.90    543.48 o
   7   2   6   1773.23   1248.84    312.21 o
   8   2   6    289.44    705.36    289.08 <
   9   2   6   6472.10   5157.25    485.66 o
  10   2   6   3406.21   3041.16    508.79 o
  11   2   6   3814.24   3364.93    543.48 o
 -13   3   6   5748.56   7250.22    844.12 o
 -12   3   6   3873.03   2948.65    659.11 o
 -11   3   6   1571.74   1607.30    555.04 <
 -10   3   6    432.42    196.58    462.53 <
  -9   3   6    153.91   -127.20    370.03 <
  -8   3   6  16429.00  16130.90    832.56 o
  -7   3   6  10497.50  10973.60    474.10 o
  -6   3   6    439.85    404.72    196.58 <
  -5   3   6  13326.50  13274.70    416.28 o
  -4   3   6   4501.94   3966.23    265.96 o
  -3   3   6   6371.30   6059.19    370.03 o
  -2   3   6   3647.56   3943.10    300.65 o
  -1   3   6   5886.21   6267.33    323.77 o
   0   3   6  44202.80  44599.80    774.74 o
   1   3   6   3345.11   3376.50    231.27 o
   2   3   6   1067.22   1052.26    173.45 o
   3   3   6   5196.76   4972.24    265.96 o
   4   3   6   2133.49   1410.73    219.70 o
   5   3   6  10925.30  11054.60    393.15 o
   6   3   6    708.86    601.29    254.39 <
   7   3   6   7004.14   7238.65    531.91 o
   8   3   6   7990.64   7666.50    450.97 o
   9   3   6     52.87   -647.55    543.48 <
  10   3   6   1526.08   1711.37    485.66 o
  11   3   6    600.84     23.13    497.22 <
 -13   4   6   4257.16   3966.23    728.49 o
 -12   4   6   3810.02   3839.03    659.11 o
 -11   4   6    419.85   -404.72    531.91 <
 -10   4   6  32919.00  36100.80   1422.29 o
  -9   4   6   1676.83   1503.23    312.21 o
  -8   4   6   3214.26   3260.86    427.84 o
  -7   4   6     80.87     92.51    242.83 <
  -6   4   6    447.87    635.98    231.27 <
  -5   4   6  41867.80  42183.10    936.63 o
  -4   4   6   2840.81   2312.67    254.39 o
  -3   4   6  31800.00  34192.80    994.45 o
  -2   4   6   5585.17   5932.00    381.59 o
  -1   4   6   4508.83   4220.62    231.27 o
   0   4   6    253.44    289.08    150.32 <
   1   4   6  13555.90  14327.00    485.66 o
   2   4   6  25320.00  25508.70    624.42 o
   3   4   6  21197.70  22074.40    578.17 o
   4   4   6   2172.73   1896.39    277.52 o
   5   4   6  25701.60  26468.50    786.31 o
   6   4   6   2853.45   2347.36    404.72 o
   7   4   6     32.74   -335.34    370.03 <
   8   4   6   1580.43   1988.90    450.97 o
   9   4   6    406.06   -138.76    416.28 <
  10   4   6  19876.80  21658.10    994.45 o
  11   4   6      8.86   -150.32    531.91 <
 -12   5   6     54.63    -23.13    589.73 <
 -11   5   6  18906.60  17599.40   1029.14 o
 -10   5   6   8032.24   8233.10    716.93 o
  -9   5   6   1458.30    936.63    439.41 <
  -8   5   6      2.65   -127.20    370.03 <
  -7   5   6  26345.80  29301.50    774.74 o
  -6   5   6  36829.70  38031.80    797.87 o
  -5   5   6   2073.57   1711.37    277.52 o
  -4   5   6    835.26    948.19    277.52 o
  -3   5   6  23120.10  22907.00    844.12 o
  -2   5   6  70686.00  67252.40   1561.05 o
  -1   5   6   3771.57   3538.38    231.27 o
   0   5   6    184.46    520.35    185.01 <
   1   5   6   5196.67   4602.21    254.39 o
   2   5   6  42130.90  44172.00   1063.83 o
   3   5   6  20648.80  20987.50    659.11 o
   4   5   6   3260.98   2948.65    312.21 o
   5   5   6    106.92    219.70    277.52 <
   6   5   6  19569.60  19865.80   1561.05 o
   7   5   6  14098.20  14234.50    959.76 o
   8   5   6     55.38    -23.13    439.41 <
   9   5   6   5209.15   5076.31    612.86 o
  10   5   6    986.98    728.49    543.48 <
  11   5   6  10496.40  10187.30   1387.60 o
 -12   6   6    478.22    844.12    832.56 <
 -11   6   6   5364.04   6302.02   1040.70 o
 -10   6   6   8213.05   7608.68   1006.01 o
  -9   6   6  17011.40  15367.70   1098.52 o
  -8   6   6    387.50   -173.45    427.84 <
  -7   6   6   1480.22   1237.28    393.15 o
  -6   6   6  30174.50  30874.10   1040.70 o
  -5   6   6   2772.50   2636.44    393.15 o
  -4   6   6    309.26    231.27    312.21 <
  -3   6   6   2223.01   1965.77    265.96 o
  -2   6   6   1667.91   1526.36    208.14 o
  -1   6   6  17838.70  18802.00    474.10 o
   0   6   6   1102.92    774.74    196.58 o
   1   6   6  32928.20  34366.30    797.87 o
   2   6   6    189.16    289.08    231.27 <
   3   6   6    810.58    612.86    300.65 <
   4   6   6    649.53    370.03    381.59 <
   5   6   6   7093.31   6186.39    705.36 o
   6   6   6  34874.60  35233.50   2277.98 o
   7   6   6     26.57   -138.76    901.94 <
   8   6   6    209.73   -867.25    913.50 <
   9   6   6  14370.10  15795.50   1699.81 o
  -8   7   6  14281.50  12419.00   1699.81 o
  -7   7   6   3577.26   4232.18   1271.97 o
  -6   7   6   9208.66   7608.68    797.87 o
  -5   7   6  16092.70  15263.60    994.45 o
  -4   7   6    456.05   1040.70    439.41 <
  -3   7   6  25061.00  24109.60    959.76 o
  -2   7   6  15526.90  16477.80   1075.39 o
  -1   7   6   2891.29   3769.65    913.50 o
   0   7   6  23854.90  25682.20   1815.44 o
   1   7   6   3084.72   2879.27    659.11 o
   2   7   6  10537.30  10222.00    936.63 o
   3   7   6  22590.90  23369.50   1306.66 o
   4   7   6     95.83   -393.15    566.60 <
   5   7   6   9743.62  10094.80   1468.54 o
   6   7   6   4027.99   3492.13   1098.52 o
   7   7   6    237.28   -161.89   1052.26 <
  -6   8   6     33.35   -335.34   1029.14 <
  -5   8   6    596.40   -231.27    716.93 <
  -4   8   6   1293.48   1052.26    728.49 <
  -3   8   6   3570.61   3260.86    786.31 o
  -2   8   6    282.29   -751.62    728.49 <
  -1   8   6   3221.13   3156.79   1029.14 o
   0   8   6    139.12   -289.08    855.69 <
   1   8   6    440.70   1665.12    705.36 <
   2   8   6     25.92     23.13    670.67 <
   3   8   6   8424.82   6117.01   1352.91 o
  -1   9   6   5144.14   5989.81   1318.22 o
   0   9   6   3901.25   4359.38   1191.02 o
 -14   1   7    767.61   1329.78    925.07 <
 -13   1   7   3132.07   3723.40   1006.01 o
 -12   1   7   3310.02   3341.81    901.94 o
 -11   1   7  16529.40  16385.30   1387.60 o
 -10   1   7   7535.01   7111.46   1017.57 o
  -9   1   7   8270.05   7573.99    555.04 o
  -8   1   7  21801.20  22190.10    913.50 o
  -7   1   7  31154.70  29949.10    821.00 o
  -6   1   7   5599.04   5932.00    289.08 o
  -5   1   7   1970.29   1491.67    196.58 o
  -4   1   7   3992.83   4104.99    242.83 o
  -3   1   7  34236.50  35672.90    774.74 o
  -2   1   7  48230.60  48681.70    971.32 o
  -1   1   7  12455.30  13066.60    381.59 o
   0   1   7    108.33     23.13    115.63 <
   1   1   7  11406.00  11632.70    335.34 o
   2   1   7   3897.37   4185.93    277.52 o
   3   1   7  10004.10   9909.78    416.28 o
   4   1   7  15385.90  15078.60    474.10 o
   5   1   7    115.09    370.03    208.14 <
   6   1   7  17767.40  17333.50    589.73 o
   7   1   7   2911.76   2509.25    300.65 o
   8   1   7   1522.65   1387.60    323.77 o
   9   1   7   2126.65   1514.80    346.90 o
  10   1   7     13.51   -809.43    566.60 <
  11   1   7   3160.12   4070.30   1075.39 o
 -13   2   7   2997.29   2775.20    670.67 o
 -12   2   7   9186.36   8811.27    832.56 o
 -11   2   7  18811.40  18663.20   1052.26 o
 -10   2   7   3684.27   3839.03    416.28 o
  -9   2   7   2324.97   2428.30    370.03 o
  -8   2   7  10982.20  11008.30    555.04 o
  -7   2   7  20230.30  20675.30    508.79 o
  -6   2   7  32683.00  33834.30    659.11 o
  -5   2   7   1751.22   1803.88    185.01 o
  -4   2   7 129186.00 130284.00   2069.84 o
  -3   2   7   5509.53   5538.84    289.08 o
  -2   2   7   1402.38   1387.60    185.01 o
  -1   2   7    160.46      0.00    161.89 <
   0   2   7  23528.80  23438.90    578.17 o
   1   2   7 179119.00 171103.00   3133.67 o
   2   2   7   1399.59   1410.73    219.70 o
   3   2   7   2917.69   2486.12    254.39 o
   4   2   7  53811.40  54104.90   1110.08 o
   5   2   7  37107.70  35846.40    855.69 o
   6   2   7  27555.30  25763.10   1110.08 o
   7   2   7    102.09   -173.45    289.08 <
   8   2   7    406.27     23.13    312.21 <
   9   2   7  56073.90  60788.50   1491.67 o
  10   2   7   8367.45   7365.85    543.48 o
  11   2   7     48.36   -127.20    497.22 <
 -13   3   7   2479.63    763.18    670.67 <
 -12   3   7  20324.70  21056.80   1167.90 o
 -11   3   7  41309.80  42772.80   1653.56 o
 -10   3   7   6111.80   6151.70    659.11 o
  -9   3   7     12.34   -231.27    450.97 <
  -8   3   7  37167.50  38320.90   1075.39 o
  -7   3   7  70681.60  71715.90   1387.60 o
  -6   3   7  20226.60  19125.80    589.73 o
  -5   3   7    149.68     80.94    196.58 <
  -4   3   7   3490.50   3815.90    265.96 o
  -3   3   7  85775.90  87048.80   1838.57 o
  -2   3   7  41053.00  44773.30    959.76 o
  -1   3   7   7034.00   7689.62    335.34 o
   0   3   7     90.56     11.56    150.32 <
   1   3   7  27484.60  26410.70    693.80 o
   2   3   7  30696.20  31463.90    705.36 o
   3   3   7    127.87    173.45    231.27 <
   4   3   7  20063.60  18940.80    612.86 o
   5   3   7    283.57    867.25    381.59 <
   6   3   7  17516.90  18432.00    786.31 o
   7   3   7    516.97    624.42    381.59 <
   8   3   7  14705.70  14916.70    763.18 o
   9   3   7   7210.61   6533.29    520.35 o
  10   3   7    401.42   -751.62    427.84 <
  11   3   7    469.57   -647.55    543.48 <
 -13   4   7    130.08    370.03    647.55 <
 -12   4   7    296.98    138.76    578.17 <
 -11   4   7    117.79    -46.25    520.35 <
 -10   4   7   8271.87   7759.00    705.36 o
  -9   4   7   2513.21   1780.75    393.15 o
  -8   4   7  20357.30  21496.30   1017.57 o
  -7   4   7    310.38    520.35    265.96 <
  -6   4   7    337.90    497.22    254.39 <
  -5   4   7   2814.58   2382.05    277.52 o
  -4   4   7  17012.50  17090.60    774.74 o
  -3   4   7  56559.60  56637.30   1480.11 o
  -2   4   7     35.33    -34.69    231.27 <
  -1   4   7   4352.16   3919.97    265.96 o
   0   4   7  43552.10  43304.70    844.12 o
   1   4   7  18755.20  18663.20    531.91 o
   2   4   7  29321.40  28376.40    774.74 o
   3   4   7   2905.57   2971.78    289.08 o
   4   4   7  10127.60   9632.26    427.84 o
   5   4   7  53179.50  56406.00   2752.08 o
   6   4   7   9217.73   8672.51   1052.26 o
   7   4   7   1808.53   1803.88    520.35 o
   8   4   7  10863.80   8880.65    670.67 o
   9   4   7   7234.73   6683.61    647.55 o
  10   4   7  12515.10  13748.80    855.69 o
  11   4   7    855.79    601.29    901.94 <
 -12   5   7   7831.39   8198.41    844.12 o
 -11   5   7   2210.83   1376.04    566.60 <
 -10   5   7    338.11    289.08    485.66 <
  -9   5   7  24428.70  24468.00   1098.52 o
  -8   5   7    139.99    416.28    393.15 <
  -7   5   7   4711.22   4451.89    370.03 o
  -6   5   7  17539.30  16674.30    566.60 o
  -5   5   7    137.09     69.38    323.77 <
  -4   5   7  23530.00  24849.60    948.19 o
  -3   5   7   1573.67   1260.40    312.21 o
  -2   5   7    880.72   1040.70    219.70 o
  -1   5   7  32022.80  32516.10    693.80 o
   0   5   7    612.44    566.60    185.01 o
   1   5   7     85.01   -173.45    196.58 <
   2   5   7   8909.14   8822.83    381.59 o
   3   5   7   5273.33   5376.95    381.59 o
   4   5   7   4937.21   4833.48    381.59 o
   5   5   7     60.93    404.72    381.59 <
   6   5   7   7142.20   6556.42   1063.83 o
   7   5   7   2722.30   3469.00    878.81 o
   8   5   7   2985.23   2185.47    878.81 <
   9   5   7   1210.28   1376.04    647.55 <
  10   5   7     63.53    138.76    624.42 <
 -11   6   7   3275.31   3122.10    878.81 o
 -10   6   7   1609.44   1352.91    774.74 <
  -9   6   7    465.43   -335.34    635.98 <
  -8   6   7   1405.14   1144.77    647.55 <
  -7   6   7    800.96    520.35    404.72 <
  -6   6   7  13871.40  12916.30    682.24 o
  -5   6   7    650.08    370.03    358.46 <
  -4   6   7   5504.71   4995.36    462.53 o
  -3   6   7   1035.65    624.42    231.27 <
  -2   6   7   4244.11   4104.99    312.21 o
  -1   6   7   6377.27   6001.38    346.90 o
   0   6   7    148.59     46.25    231.27 <
   1   6   7   6326.01   6533.29    370.03 o
   2   6   7  12173.90  10430.10    439.41 o
   3   6   7   9912.75  10013.90    450.97 o
   4   6   7    198.27   -277.52    474.10 <
   5   6   7    143.86   -138.76    855.69 <
   6   6   7    425.30   -138.76    901.94 <
   7   6   7   6823.39   7608.68   1271.97 o
   8   6   7   1980.07    693.80    959.76 <
   9   6   7   3942.67   4070.30   1086.95 o
  -8   7   7     51.55   -774.74   1017.57 <
  -7   7   7  13751.10  12245.60   1734.50 o
  -6   7   7   1623.19    740.05   1098.52 <
  -5   7   7  13868.80  12754.40    925.07 o
  -4   7   7     39.80   -289.08    439.41 <
  -3   7   7  11792.80   9898.22   1260.40 o
  -2   7   7   2347.82   1780.75    797.87 <
  -1   7   7   1589.00   1237.28    416.28 <
   0   7   7   8067.80   7250.22    578.17 o
   1   7   7   2730.96   2012.02    612.86 o
   2   7   7  16726.90  16107.70   1110.08 o
   3   7   7   3885.79   4914.42   1144.77 o
   4   7   7   6091.40   7608.68   1318.22 o
   5   7   7     54.54   1896.39   1006.01 <
   6   7   7   3743.41   3318.68   1063.83 o
  -5   8   7    118.53   -161.89    959.76 <
  -4   8   7   4654.64   4949.11    936.63 o
  -3   8   7  14684.80  15957.40   1283.53 o
  -2   8   7   4586.08   2740.51   1029.14 <
  -1   8   7     12.69   -971.32    948.19 <
   0   8   7  22530.80  21866.30   1399.16 o
   1   8   7   3327.04   4671.59   1248.84 o
   2   8   7   3108.78    890.38   1040.70 <
 -13   0   8  34590.10  42460.60   2532.37 o
 -12   0   8    144.22   -242.83    786.31 <
 -11   0   8   1592.22   1676.68    809.43 <
 -10   0   8   1163.04   1110.08    728.49 <
  -9   0   8  34807.80  36436.10   2116.09 o
  -8   0   8  92723.30  88667.70   3908.41 o
  -7   0   8  10391.20  10245.10    578.17 o
  -6   0   8   2236.87   1965.77    335.34 o
  -5   0   8 125869.00 124699.00   2867.71 o
  -4   0   8  45067.20  45073.90   1063.83 o
  -3   0   8  40797.10  38748.80   1086.95 o
  -2   0   8    116.75    289.08    196.58 <
  -1   0   8   8606.70   8984.72    508.79 o
   0   0   8 259760.00 255677.00   5365.39 o
   1   0   8  11275.80  11574.90    659.11 o
   2   0   8    214.00    531.91    312.21 <
   3   0   8  20560.60  21611.90    971.32 o
   4   0   8  22574.20  23149.80   1040.70 o
   5   0   8  70349.00  70883.30   2301.11 o
   6   0   8    179.07   -173.45    427.84 <
   7   0   8  10703.70  11459.30    797.87 o
   8   0   8  30480.60  27648.00    751.62 o
   9   0   8   7719.16   6325.15    520.35 o
  10   0   8    620.57    878.81    578.17 <
  11   0   8    803.32    890.38   1063.83 <
 -13   1   8   2349.10   -254.39    832.56 <
 -12   1   8  30526.80  32839.90   2104.53 o
 -11   1   8  17799.50  18709.50   1086.95 o
 -10   1   8   6451.85   6290.46   1006.01 o
  -9   1   8   2428.82   1838.57    670.67 <
  -8   1   8  19418.80  17506.90    821.00 o
  -7   1   8  17675.00  17472.20    555.04 o
  -6   1   8   1846.16   1618.87    231.27 o
  -5   1   8  26417.40  27127.60    659.11 o
  -4   1   8   9227.62   9747.90    370.03 o
  -3   1   8  35632.10  35418.50    774.74 o
  -2   1   8   8191.53   8209.97    289.08 o
  -1   1   8  11856.20  12002.80    381.59 o
   0   1   8   7460.82   7296.47    265.96 o
   1   1   8   2232.59   1769.19    196.58 o
   2   1   8   1110.37    797.87    208.14 o
   3   1   8  42554.00  41188.60   1017.57 o
   4   1   8  25211.40  24028.60    716.93 o
   5   1   8    368.76    427.84    242.83 <
   6   1   8   3882.08   3642.45    346.90 o
   7   1   8  12942.50  13321.00    647.55 o
   8   1   8  30178.30  27879.20    971.32 o
   9   1   8   8676.93   8695.63    589.73 o
  10   1   8    698.05    566.60    555.04 <
 -13   2   8   3425.38   2971.78    682.24 o
 -12   2   8   4826.93   5111.00    740.05 o
 -11   2   8     45.81   -346.90    416.28 <
 -10   2   8   2691.61   2046.71    566.60 o
  -9   2   8   8838.91   9343.18    566.60 o
  -8   2   8   5901.82   6140.13    450.97 o
  -7   2   8   8476.47   9354.75    416.28 o
  -6   2   8   2039.44   1896.39    208.14 o
  -5   2   8   7323.69   7203.96    289.08 o
  -4   2   8  34470.70  34828.80    635.98 o
  -3   2   8   6550.80   6186.39    312.21 o
  -2   2   8   5016.99   5099.43    289.08 o
  -1   2   8  18979.20  18651.70    531.91 o
   0   2   8   6142.31   5932.00    277.52 o
   1   2   8  22018.30  20339.90    474.10 o
   2   2   8   1048.68    786.31    231.27 o
   3   2   8    715.33    705.36    231.27 o
   4   2   8  22654.40  22005.00    774.74 o
   5   2   8   2414.77   2694.26    497.22 o
   6   2   8   1069.22    705.36    289.08 <
   7   2   8    643.73    312.21    323.77 <
   8   2   8    164.38    265.96    335.34 <
   9   2   8   4395.26   4081.86    450.97 o
  10   2   8     59.37   -566.60    531.91 <
 -13   3   8   2214.54   2428.30    682.24 o
 -12   3   8   1253.54    578.17    578.17 <
 -11   3   8   2308.34   2324.23    601.29 o
 -10   3   8  12345.20  11759.90    682.24 o
  -9   3   8    912.76   1144.77    370.03 o
  -8   3   8    806.67    948.19    254.39 o
  -7   3   8    994.35    716.93    231.27 o
  -6   3   8   3265.84   2671.13    277.52 o
  -5   3   8  14194.40  14407.90    439.41 o
  -4   3   8   1860.16   1954.20    254.39 o
  -3   3   8  21964.90  23149.80    635.98 o
  -2   3   8  17897.10  17680.40    543.48 o
  -1   3   8   2702.19   2393.61    219.70 o
   0   3   8   2027.77   2069.84    196.58 o
   1   3   8    101.35    370.03    208.14 <
   2   3   8  14323.30  13390.40    427.84 o
   3   3   8   9768.41  10129.50    543.48 o
   4   3   8    517.77    601.29    474.10 <
   5   3   8  19125.00  17599.40   1225.71 o
   6   3   8   1032.31    381.59    508.79 <
   7   3   8   1568.68    971.32    404.72 <
   8   3   8    923.42    809.43    370.03 <
   9   3   8    343.18    450.97    404.72 <
  10   3   8  13126.80  13297.80    855.69 o
 -13   4   8  12717.70  12002.80    994.45 o
 -12   4   8    114.42    751.62    589.73 <
 -11   4   8   1125.38   2023.59    589.73 o
 -10   4   8    270.42   -138.76    485.66 <
  -9   4   8   7132.37   5851.05    462.53 o
  -8   4   8  25416.40  24872.80    855.69 o
  -7   4   8   8079.63   7967.14    589.73 o
  -6   4   8   4472.65   3237.74    346.90 o
  -5   4   8  25246.40  26711.30   1086.95 o
  -4   4   8   7264.05   8094.34    520.35 o
  -3   4   8   2055.00   1861.70    335.34 o
  -2   4   8   4524.10   4093.42    346.90 o
  -1   4   8   1016.43    774.74    219.70 o
   0   4   8  69379.30  69310.70   1225.71 o
   1   4   8   1478.40   1780.75    219.70 o
   2   4   8   6755.96   6683.61    370.03 o
   3   4   8   1135.09   1283.53    254.39 o
   4   4   8   4686.90   3908.41    763.18 o
   5   4   8  20462.40  20640.60   1456.98 o
   6   4   8    966.09    196.58    647.55 <
   7   4   8  11087.70   9146.60   1040.70 o
   8   4   8   8729.10   9007.84   1098.52 o
   9   4   8   3771.29   2960.22    693.80 o
  10   4   8    134.99   -485.66    693.80 <
 -12   5   8  16133.80  15460.20   1052.26 o
 -11   5   8   2748.16   2185.47    635.98 o
 -10   5   8    987.60    959.76    485.66 <
  -9   5   8     16.36   -485.66    462.53 <
  -8   5   8  16663.30  15830.20    693.80 o
  -7   5   8  14731.20  14592.90    774.74 o
  -6   5   8   6511.62   4856.60    520.35 o
  -5   5   8   5914.62   5319.14    485.66 o
  -4   5   8   4978.61   5018.49    485.66 o
  -3   5   8  19228.10  20860.30    821.00 o
  -2   5   8    766.63    751.62    219.70 o
  -1   5   8  29085.50  27809.80    647.55 o
   0   5   8   1321.82   1271.97    219.70 o
   1   5   8  12360.80  12488.40    416.28 o
   2   5   8     11.29    185.01    219.70 <
   3   5   8  27026.90  28237.70    821.00 o
   4   5   8  14456.00  12858.40   1283.53 o
   5   5   8    112.64   -231.27    693.80 <
   6   5   8    803.37    231.27    728.49 <
   7   5   8  12631.50  12765.90   1341.35 o
   8   5   8  23943.90  21750.60   1711.37 o
   9   5   8    476.14   1179.46    821.00 <
 -11   6   8   2133.52   1988.90    844.12 <
 -10   6   8   3604.62   3133.67    832.56 o
  -9   6   8  26895.20  28607.70   1526.36 o
  -8   6   8   4070.21   3515.26    716.93 o
  -7   6   8   7200.39   5631.35    543.48 o
  -6   6   8   1464.44   1445.42    439.41 o
  -5   6   8  13102.30  12592.50    682.24 o
  -4   6   8  60414.30  61563.20   1861.70 o
  -3   6   8   1739.76   1156.33    277.52 o
  -2   6   8   1095.85   1110.08    265.96 o
  -1   6   8  29779.80  30215.00    774.74 o
   0   6   8  16802.40  16258.10    555.04 o
   1   6   8  25390.70  27416.70    728.49 o
   2   6   8    102.92    381.59    265.96 <
   3   6   8    255.12     46.25    381.59 <
   4   6   8  40031.70  43593.80   2624.88 o
   5   6   8   5917.12   6290.46   1156.33 o
   6   6   8     12.74   -682.24    925.07 <
   7   6   8    720.01   2439.87    925.07 <
   8   6   8    831.50    543.48    901.94 <
  -7   7   8   5474.10   8094.34   1480.11 o
  -6   7   8   1345.80   1318.22   1156.33 <
  -5   7   8   2983.90   4243.75   1191.02 o
  -4   7   8    294.80    531.91    797.87 <
  -3   7   8   1642.94   1410.73    821.00 <
  -2   7   8   2187.70   1191.02    624.42 <
  -1   7   8   7676.67   7308.03    867.25 o
   0   7   8   1267.77   1260.40    624.42 <
   1   7   8    237.12   1006.01    578.17 <
   2   7   8   9363.00  10915.80   1410.73 o
   3   7   8   2127.53   3457.44   1179.46 <
   4   7   8   2809.84   2358.92   1029.14 <
   5   7   8   7476.83   6810.81   1306.66 o
   6   7   8     76.07    161.89   1052.26 <
  -5   8   8   2450.34    936.63    959.76 <
  -4   8   8   2179.54   2116.09   1063.83 <
  -3   8   8   4826.17   3226.17   1063.83 o
  -2   8   8  13317.30  13714.10   1191.02 o
  -1   8   8   4405.62   2948.65    786.31 o
   0   8   8    254.46    913.50   1110.08 <
 -13   1   9   3573.35   3492.13    982.88 o
 -12   1   9   8538.11   8290.92   1167.90 o
 -11   1   9   8238.27   7793.69   1167.90 o
 -10   1   9    309.72    115.63    716.93 <
  -9   1   9      6.27   -439.41    635.98 <
  -8   1   9    301.47   -208.14    624.42 <
  -7   1   9   4226.83   4128.11    462.53 o
  -6   1   9  30541.70  30839.40    693.80 o
  -5   1   9   3927.37   3931.54    254.39 o
  -4   1   9  20262.80  20733.10    566.60 o
  -3   1   9  12728.60  12476.80    416.28 o
  -2   1   9   5070.60   4821.91    277.52 o
  -1   1   9  22355.20  23404.20    589.73 o
   0   1   9   4627.12   4336.25    231.27 o
   1   1   9  14044.60  13263.20    508.79 o
   2   1   9  29287.70  29683.10    821.00 o
   3   1   9  33038.70  32296.40   1006.01 o
   4   1   9     41.85    346.90    265.96 <
   5   1   9   1373.83   1029.14    335.34 o
   6   1   9     75.05   -277.52    312.21 <
   7   1   9  12182.80  12465.30    647.55 o
   8   1   9  14261.90  17113.70   1006.01 o
   9   1   9   4336.00   3110.54    670.67 o
  10   1   9    164.66   -971.32    635.98 <
 -13   2   9   6486.25   5481.02    797.87 o
 -12   2   9   3402.37   3665.58    705.36 o
 -11   2   9    471.49    254.39    589.73 <
 -10   2   9   7980.42   8950.03    809.43 o
  -9   2   9  91687.40  95929.50   2370.49 o
  -8   2   9    152.89    254.39    335.34 <
  -7   2   9   1873.10   1896.39    277.52 o
  -6   2   9  24277.20  23797.40    647.55 o
  -5   2   9  20381.20  20675.30    508.79 o
  -4   2   9  58145.10  57978.60   1098.52 o
  -3   2   9    852.91    682.24    196.58 o
  -2   2   9   7471.15   8337.17    346.90 o
  -1   2   9  77027.30  75566.40   1468.54 o
   0   2   9  16436.10  16628.10    393.15 o
   1   2   9   1882.83   2023.59    323.77 o
   2   2   9   1102.49   1133.21    300.65 o
   3   2   9   2870.14   2382.05    427.84 o
   4   2   9  34899.80  34898.20   1341.35 o
   5   2   9    197.41    878.81    393.15 <
   6   2   9  42296.10  45305.20   1607.30 o
   7   2   9    650.57    485.66    427.84 <
   8   2   9    759.96   -115.63    370.03 <
   9   2   9    434.29   1133.21    508.79 <
  10   2   9   5380.20   4845.04    670.67 o
 -13   3   9   7523.35   6672.05    832.56 o
 -12   3   9   5533.25   5908.87    774.74 o
 -11   3   9   4475.57   4428.76    508.79 o
 -10   3   9   7071.85   7446.79    740.05 o
  -9   3   9     10.43   -150.32    474.10 <
  -8   3   9   5784.42   5099.43    427.84 o
  -7   3   9   1625.72   1456.98    277.52 o
  -6   3   9  45728.30  49132.60   1214.15 o
  -5   3   9   7834.44   7782.13    450.97 o
  -4   3   9   2552.70   2439.87    289.08 o
  -3   3   9   4985.36   4555.96    323.77 o
  -2   3   9  47782.50  49757.10   1086.95 o
  -1   3   9  61719.60  61655.70   1156.33 o
   0   3   9   2002.28   1861.70    242.83 o
   1   3   9    481.64    370.03    231.27 <
   2   3   9  55233.10  55654.40   1503.23 o
   3   3   9  58257.70  58441.10   2694.26 o
   4   3   9   8984.00   8452.80    878.81 o
   5   3   9    867.11   1156.33    531.91 <
   6   3   9   7839.99   9331.62    913.50 o
   7   3   9  44635.30  42425.90   1618.87 o
   8   3   9  13624.40  12384.30    878.81 o
   9   3   9    209.15    173.45    647.55 <
  10   3   9   1140.71    127.20    913.50 <
 -12   4   9   1065.15   1052.26    612.86 <
 -11   4   9   4238.05   4370.94    682.24 o
 -10   4   9  19558.30  19773.30    901.94 o
  -9   4   9  11278.10  10256.70    589.73 o
  -8   4   9  22500.70  21357.50    832.56 o
  -7   4   9   1337.23   1364.47    427.84 o
  -6   4   9   5231.27   5631.35    555.04 o
  -5   4   9  52109.70  54139.60   1572.61 o
  -4   4   9   6594.11   5307.57    462.53 o
  -3   4   9   1718.09   1572.61    346.90 o
  -2   4   9   8061.55   8198.41    531.91 o
  -1   4   9   6397.28   6371.40    370.03 o
   0   4   9  21556.40  22224.70    578.17 o
   1   4   9     88.76     92.51    208.14 <
   2   4   9   6259.94   5989.81    381.59 o
   3   4   9   9367.51  11181.80   1063.83 o
   4   4   9    714.03   1641.99    635.98 <
   5   4   9     85.26   -485.66    635.98 <
   6   4   9    868.67   1618.87    716.93 <
   7   4   9   6486.23   6810.81    948.19 o
   8   4   9   1087.80   1225.71    693.80 <
   9   4   9    187.87    404.72    948.19 <
  10   4   9   7557.54   8591.56   1341.35 o
 -12   5   9    877.99   1607.30    948.19 <
 -11   5   9   3162.91   4209.06    659.11 o
 -10   5   9   2747.98   1607.30    566.60 <
  -9   5   9    177.25    138.76    323.77 <
  -8   5   9     54.99   -335.34    485.66 <
  -7   5   9  10290.60   9851.97    716.93 o
  -6   5   9    343.74    -57.82    416.28 <
  -5   5   9   2432.69   1387.60    416.28 o
  -4   5   9  17766.00  17136.90    774.74 o
  -3   5   9    253.08    601.29    346.90 <
  -2   5   9  16651.20  15876.50    543.48 o
  -1   5   9   4458.11   4047.17    300.65 o
   0   5   9   1525.85   1630.43    254.39 o
   1   5   9  29362.50  29660.00    693.80 o
   2   5   9    560.87    693.80    265.96 <
   3   5   9   3039.37   2451.43    809.43 o
   4   5   9  16898.30  16847.80   1433.85 o
   5   5   9    249.95    462.53    763.18 <
   6   5   9  11768.80  10360.80   1248.84 o
   7   5   9   3022.20   2405.18    855.69 <
   8   5   9    193.07   -335.34    763.18 <
 -11   6   9   6911.24   6406.09   1052.26 o
 -10   6   9     93.56    381.59    763.18 <
  -9   6   9   3289.44   2393.61    786.31 o
  -8   6   9   4020.81   2682.70    716.93 o
  -7   6   9   7819.91   6151.70    809.43 o
  -6   6   9     40.94    -80.94    404.72 <
  -5   6   9    553.38    647.55    370.03 <
  -4   6   9    694.40    670.67    381.59 <
  -3   6   9   8839.13   8973.15    497.22 o
  -2   6   9   6399.16   5376.95    393.15 o
  -1   6   9   7427.20   7134.58    416.28 o
   0   6   9   1687.52   1121.64    289.08 o
   1   6   9   2518.85   2705.82    323.77 o
   2   6   9   3261.54   3596.20    474.10 o
   3   6   9    124.96   -416.28    404.72 <
   4   6   9  10226.30   8857.52    855.69 o
   5   6   9     11.91    543.48    878.81 <
   6   6   9   8169.30  10152.60   1376.04 o
   7   6   9    144.17   -531.91    948.19 <
   8   6   9   1542.85   2509.25    994.45 <
  -4   7   9   3899.99   3330.24    797.87 o
  -3   7   9   6746.88   5573.53    832.56 o
  -2   7   9  14554.70  12823.70   1063.83 o
  -1   7   9   7573.40   8545.31    878.81 o
   0   7   9   3577.51   2301.11   1040.70 <
   1   7   9   1022.74   -161.89    890.38 <
   2   7   9   1198.63    959.76   1006.01 <
   3   7   9  11999.30  12245.60   1607.30 o
   4   7   9    797.49    150.32   1052.26 <
   5   7   9   4908.89   4925.98   1260.40 o
  -5   8   9  32817.40  35719.20   2509.25 o
  -4   8   9    532.64    150.32    925.07 <
  -3   8   9    732.42    138.76    936.63 <
 -13   0  10  10243.80   9262.24   1318.22 o
 -12   0  10    911.01    682.24    971.32 <
 -11   0  10    179.12    127.20    786.31 <
 -10   0  10  57835.60  59424.00   3087.41 o
  -9   0  10   5804.75   4764.10    971.32 o
  -8   0  10   4148.79   2948.65    809.43 o
  -7   0  10   1471.43   2173.91    693.80 o
  -6   0  10    590.58    300.65    393.15 <
  -5   0  10  43096.60  39592.90   1480.11 o
  -4   0  10   5313.51   5365.39    416.28 o
  -3   0  10  56518.80  54185.80   1456.98 o
  -2   0  10  12473.70  12291.80    566.60 o
  -1   0  10   1411.78   1248.84    335.34 o
   0   0  10   7888.65   7146.15    450.97 o
   1   0  10  31639.10  32111.40   1306.66 o
   2   0  10  57755.20  55816.30   2786.77 o
   3   0  10  10522.90  11413.00   1121.64 o
   4   0  10    916.44    855.69    624.42 <
   5   0  10  80051.90  78075.70   3619.33 o
   6   0  10  14125.60  13552.20   1283.53 o
   7   0  10   3307.99   3122.10    832.56 o
   8   0  10     99.82   -219.70    705.36 <
   9   0  10   5508.03   4983.80    959.76 o
 -13   1  10   1681.92    797.87    959.76 <
 -12   1  10   6162.81   7770.57   1271.97 o
 -11   1  10  12345.00  12950.90   1410.73 o
 -10   1  10  14338.80  19102.60   1584.18 o
  -9   1  10   1850.20    925.07    763.18 <
  -8   1  10     26.59   -763.18    693.80 <
  -7   1  10  53576.50  53249.20   2717.39 o
  -6   1  10  47169.10  45814.00   1121.64 o
  -5   1  10   1487.83   1456.98    231.27 o
  -4   1  10   8050.80   8140.59    370.03 o
  -3   1  10  18301.20  19796.40    566.60 o
  -2   1  10  76559.40  75693.60   1445.42 o
  -1   1  10  34315.50  33152.10    959.76 o
   0   1  10   3688.83   3214.61    231.27 o
   1   1  10  25274.40  25346.80    774.74 o
   2   1  10  44941.80  45108.60   1295.09 o
   3   1  10   9107.32   8001.83    497.22 o
   4   1  10   1896.71   1584.18    335.34 o
   5   1  10   1716.64   1306.66    335.34 o
   6   1  10  13211.80  12962.50    728.49 o
   7   1  10  15907.10  14465.70   1376.04 o
   8   1  10   1520.18   1410.73    774.74 <
   9   1  10    794.82   1179.46    774.74 <
  10   1  10    648.08    693.80    821.00 <
 -13   2  10    746.12  -1179.46    786.31 <
 -12   2  10    719.85    693.80    450.97 <
 -11   2  10   2679.57   2486.12    682.24 o
 -10   2  10   2764.46   1803.88    601.29 o
  -9   2  10   5349.00   4024.04    647.55 o
  -8   2  10    123.47    -69.38    370.03 <
  -7   2  10    139.40    185.01    277.52 <
  -6   2  10   6905.82   6776.12    416.28 o
  -5   2  10    380.96    370.03    231.27 <
  -4   2  10     38.51    -46.25    219.70 <
  -3   2  10   2063.04   2173.91    254.39 o
  -2   2  10    396.92    289.08    185.01 <
  -1   2  10   2790.99   2347.36    219.70 o
   0   2  10    844.29    601.29    196.58 o
   1   2  10   9131.83   8718.76    647.55 o
   2   2  10   2810.02   2335.80    450.97 o
   3   2  10    937.68    450.97    381.59 <
   4   2  10    775.01    404.72    404.72 <
   5   2  10   3402.35   2543.94    485.66 o
   6   2  10  10263.30  10187.30    740.05 o
   7   2  10    679.98    404.72    416.28 <
   8   2  10    305.86    612.86    809.43 <
   9   2  10   4354.34   3943.10   1029.14 o
  10   2  10   2619.46   1711.37    948.19 <
 -12   3  10   3131.28   3145.23    693.80 o
 -11   3  10   1524.31    936.63    589.73 <
 -10   3  10     38.56    312.21    531.91 <
  -9   3  10    380.95    323.77    520.35 <
  -8   3  10  15807.50  15101.70    716.93 o
  -7   3  10   7095.73   6036.06    485.66 o
  -6   3  10    344.67    185.01    312.21 <
  -5   3  10   9142.05   8314.04    485.66 o
  -4   3  10     50.75    219.70    335.34 <
  -3   3  10   4435.16   5099.43    404.72 o
  -2   3  10   3495.69   2983.34    346.90 o
  -1   3  10   2893.78   3283.99    277.52 o
   0   3  10  33308.60  31695.10    670.67 o
   1   3  10    212.62    450.97    393.15 <
   2   3  10   1426.89   1179.46    520.35 <
   3   3  10   2474.70   3214.61    693.80 o
   4   3  10   1021.85    612.86    508.79 <
   5   3  10   7994.29   6903.32    809.43 o
   6   3  10     27.10    300.65    450.97 <
   7   3  10   4134.18   3700.27    578.17 o
   8   3  10   4202.99   3688.71   1052.26 o
   9   3  10     55.18   -786.31   1040.70 <
  10   3  10     87.95    901.94    913.50 <
 -12   4  10   4473.98   5053.18    763.18 o
 -11   4  10   1258.91    612.86    474.10 <
 -10   4  10  25052.60  26329.70   1329.78 o
  -9   4  10   1072.31    716.93    416.28 <
  -8   4  10   2813.57   2798.33    450.97 o
  -7   4  10    241.19    566.60    346.90 <
  -6   4  10    170.53   -312.21    381.59 <
  -5   4  10  30267.00  30457.80   1098.52 o
  -4   4  10   1878.07   1364.47    393.15 o
  -3   4  10  26735.60  26433.80    982.88 o
  -2   4  10   3084.64   2948.65    346.90 o
  -1   4  10   3298.75   2335.80    300.65 o
   0   4  10     12.59     11.56    242.83 <
   1   4  10   6786.00   6949.57    416.28 o
   2   4  10  20736.10  21820.00   1561.05 o
   3   4  10   9467.22  10696.10   1086.95 o
   4   4  10   1800.32   2023.59    693.80 <
   5   4  10  19883.40  23288.60   1572.61 o
   6   4  10   2519.19   1873.26    693.80 <
   7   4  10     61.85   -462.53    659.11 <
   8   4  10    545.33   -693.80    936.63 <
 -11   5  10  16604.00  15957.40   1063.83 o
 -10   5  10   7677.17   7308.03    786.31 o
  -9   5  10   1174.81    346.90    543.48 <
  -8   5  10     18.72   -300.65    404.72 <
  -7   5  10  22318.30  22109.10   1110.08 o
  -6   5  10  28318.70  28596.10   1098.52 o
  -5   5  10   1693.87   1052.26    427.84 <
  -4   5  10    856.97    659.11    393.15 <
  -3   5  10  16293.60  16350.60    659.11 o
  -2   5  10  50538.80  52439.80   1318.22 o
  -1   5  10   4309.99   3908.41    346.90 o
   0   5  10    485.71    289.08    265.96 <
   1   5  10   2177.07   2428.30    346.90 o
   2   5  10  29793.30  28434.30   1295.09 o
   3   5  10  14077.70  12650.30   1318.22 o
   4   5  10   1791.51   2312.67    797.87 <
   5   5  10    598.33    566.60    740.05 <
   6   5  10   8101.69   9690.08   1179.46 o
   7   5  10   9794.91   9817.28   1225.71 o
 -10   6  10   4541.10   5608.22   1017.57 o
  -9   6  10  12937.30  13552.20   1271.97 o
  -8   6  10    426.15    277.52    728.49 <
  -7   6  10   2638.08   2509.25    786.31 o
  -6   6  10  22896.90  23288.60   1537.92 o
  -5   6  10    691.49    716.93    427.84 <
  -4   6  10    585.04    705.36    427.84 <
  -3   6  10   1084.95    682.24    358.46 <
  -2   6  10   4212.11   3203.05    404.72 o
  -1   6  10  10294.50   8880.65    520.35 o
   0   6  10    794.00     11.56    404.72 <
   1   6  10  25358.70  24826.50    994.45 o
   2   6  10    357.65     69.38    416.28 <
   3   6  10   1852.51   1329.78    589.73 <
   4   6  10    577.32    705.36    612.86 <
   5   6  10   4396.47   4243.75   1098.52 o
   6   6  10  25296.60  28526.80   2092.97 o
   7   6  10     82.07   1283.53    901.94 <
  -5   7  10  12735.90  12789.10   1780.75 o
  -4   7  10    424.91   -150.32    670.67 <
  -3   7  10  17313.30  18802.00   1260.40 o
  -2   7  10  11172.90  11170.20   1006.01 o
  -1   7  10   2044.90   1873.26   1086.95 <
   0   7  10  17036.30  19727.10   1931.08 o
   1   7  10   1142.35   2116.09   1075.39 <
   2   7  10   5737.10   4301.56   1214.15 o
   3   7  10  14252.60  12488.40   1572.61 o
   4   7  10     46.32   -312.21    959.76 <
 -12   1  11   1532.80   1827.01   1017.57 <
 -11   1  11  14643.90  16142.40   1595.74 o
 -10   1  11   4618.07   2173.91    901.94 <
  -9   1  11   9375.56   8024.96   1144.77 o
  -8   1  11  16857.60  14720.10   1387.60 o
  -7   1  11  17575.20  16743.70   1410.73 o
  -6   1  11   1719.95   2208.60    427.84 o
  -5   1  11   1300.74   1191.02    289.08 o
  -4   1  11   5422.37   5134.12    370.03 o
  -3   1  11  18179.60  18085.10    635.98 o
  -2   1  11  23905.60  23577.70    728.49 o
  -1   1  11  16735.10  15841.80    566.60 o
   0   1  11    114.86    254.39    231.27 <
   1   1  11   3133.97   3457.44    543.48 o
   2   1  11    512.17    462.53    439.41 <
   3   1  11   3487.36   3272.43    566.60 o
   4   1  11  15085.80  15575.80    959.76 o
   5   1  11    196.08   1040.70    508.79 <
   6   1  11   9534.06   8695.63   1156.33 o
   7   1  11   3376.96   3260.86    948.19 o
   8   1  11   1281.51   1514.80    901.94 <
   9   1  11   2446.67   4972.24   1098.52 o
  10   1  11     95.72    971.32    925.07 <
 -12   2  11   9877.04  10638.30    994.45 o
 -11   2  11   8572.67   9932.91    925.07 o
 -10   2  11   1352.84   1191.02    601.29 <
  -9   2  11   2619.28   1757.63    589.73 <
  -8   2  11  12606.70  12661.90    693.80 o
  -7   2  11  17463.30  19414.90    693.80 o
  -6   2  11  13520.50  13136.00    659.11 o
  -5   2  11   3754.15   2578.63    358.46 o
  -4   2  11  88924.90  91165.40   1769.19 o
  -3   2  11   5202.42   5400.08    323.77 o
  -2   2  11   2598.08   2752.08    277.52 o
  -1   2  11    814.08    925.07    219.70 o
   0   2  11  16729.20  16986.60    531.91 o
   1   2  11 100854.00  99687.60   3041.16 o
   2   2  11     50.96    138.76    393.15 <
   3   2  11    600.23    728.49    404.72 <
   4   2  11  28013.20  28018.00   1202.59 o
   5   2  11  20590.80  21276.60   1029.14 o
   6   2  11  15691.00  17911.60    936.63 o
   7   2  11     45.72    786.31    832.56 <
   8   2  11    339.54   -265.96    855.69 <
   9   2  11  30489.30  28746.50   2092.97 o
 -12   3  11  17088.90  16859.40    959.76 o
 -11   3  11  27132.40  28399.60   1456.98 o
 -10   3  11   4675.47   3908.41    740.05 o
  -9   3  11     27.04    300.65    555.04 <
  -8   3  11  21789.00  20860.30    855.69 o
  -7   3  11  48225.80  46565.60   1410.73 o
  -6   3  11  11264.00  11679.00    659.11 o
  -5   3  11     79.46     92.51    312.21 <
  -4   3  11   1616.82   1191.02    335.34 o
  -3   3  11  38886.00  38968.50   1110.08 o
  -2   3  11  23188.40  23346.40    705.36 o
  -1   3  11   4718.67   4602.21    335.34 o
   0   3  11   1518.14   1283.53    242.83 o
   1   3  11  10200.20  10696.10    635.98 o
   2   3  11  13384.30  14014.80   1133.21 o
   3   3  11    244.60    450.97    462.53 <
   4   3  11  15394.50  16258.10    971.32 o
   5   3  11    245.15    196.58    485.66 <
   6   3  11   5529.73   4995.36    659.11 o
   7   3  11    375.87    416.28    844.12 <
   8   3  11   9696.10   8834.39   1341.35 o
 -12   4  11    105.26  -1422.29    994.45 <
 -11   4  11     89.65   -555.04    659.11 <
 -10   4  11   4781.77   3850.59    716.93 o
  -9   4  11   2395.03   1376.04    439.41 o
  -8   4  11  13791.90  13332.50    705.36 o
  -7   4  11     76.51   -254.39    416.28 <
  -6   4  11   2260.14   1699.81    381.59 o
  -5   4  11   2649.67   2382.05    462.53 o
  -4   4  11   9483.47   9308.49    647.55 o
  -3   4  11  33079.20  33892.20   1191.02 o
  -2   4  11     37.54    370.03    370.03 <
  -1   4  11   3927.39   4220.62    485.66 o
   0   4  11  29038.00  31313.50    913.50 o
   1   4  11   9914.40  10187.30    659.11 o
   2   4  11  14638.80  15194.20    786.31 o
   3   4  11   2077.70   2809.89    740.05 o
   4   4  11   6670.43   5793.23    867.25 o
   5   4  11  30593.30  28804.30   1769.19 o
   6   4  11   2954.69   2913.96    612.86 o
   7   4  11    282.93   -150.32    913.50 <
 -11   5  11   2446.12   3006.47   1040.70 <
 -10   5  11    146.81    104.07    624.42 <
  -9   5  11  17658.50  17414.40   1075.39 o
  -8   5  11    391.94     46.25    393.15 <
  -7   5  11   3326.37   3052.72    450.97 o
  -6   5  11   8790.34   8822.83    693.80 o
  -5   5  11    138.98   -138.76    427.84 <
  -4   5  11  11036.50  11320.50    705.36 o
  -3   5  11   1639.74   2116.09    474.10 o
  -2   5  11    279.02    150.32    416.28 <
  -1   5  11  12894.30  13852.90    612.86 o
   0   5  11    304.54    381.59    404.72 <
   1   5  11    145.31   -173.45    427.84 <
   2   5  11   4643.33   5804.80    601.29 o
   3   5  11   2531.76   1827.01    474.10 o
   4   5  11    481.89    809.43    763.18 <
   5   5  11     26.08   -901.94    751.62 <
   6   5  11   3541.96   3711.83    936.63 o
 -10   6  11   2400.29   2555.50    867.25 <
  -9   6  11     19.68   -821.00    855.69 <
  -8   6  11   1326.43   3029.60    936.63 o
  -7   6  11    510.60   -670.67    716.93 <
  -6   6  11  12664.50  10488.00    982.88 o
  -5   6  11   1099.28   2520.81    635.98 o
  -4   6  11   3550.47   3376.50    693.80 o
  -3   6  11     78.86    -57.82    381.59 <
  -2   6  11   1946.29   1861.70    381.59 o
  -1   6  11   5128.23   4960.67    543.48 o
   0   6  11    211.57    242.83    555.04 <
   1   6  11   3540.62   3688.71    659.11 o
   2   6  11   4499.94   4509.70    716.93 o
   3   6  11   7048.19   5989.81    797.87 o
   4   6  11     74.86    474.10    601.29 <
   5   6  11    174.38     69.38    601.29 <
   6   6  11     28.81    254.39    809.43 <
  -5   7  11   6328.76   6174.83   1156.33 o
  -4   7  11     50.08   -381.59   1063.83 <
  -3   7  11   8578.22   6591.11   1422.29 o
  -2   7  11   2247.84   3018.03   1202.59 <
  -1   7  11   1074.71    173.45   1017.57 <
   0   7  11   5425.22   5839.49   1341.35 o
   1   7  11   1113.33  -1133.21    948.19 <
   2   7  11  10195.00   8568.44   1399.16 o
   3   7  11   1811.51   1237.28   1075.39 <
 -12   0  12    293.62   1468.54   1017.57 <
 -11   0  12   1498.44    566.60    982.88 <
 -10   0  12   2603.55   2983.34    971.32 o
  -9   0  12  31819.70  33869.00   2220.16 o
  -8   0  12  70944.40  75323.60   3665.58 o
  -7   0  12   1440.13    948.19    786.31 <
  -6   0  12   1197.16    346.90    647.55 <
  -5   0  12  84959.00  83545.20   2648.01 o
  -4   0  12  38209.30  37754.30   1468.54 o
  -3   0  12  22494.60  22826.00    867.25 o
  -2   0  12     98.58   -104.07    323.77 <
  -1   0  12   1860.14   1838.57    450.97 o
   0   0  12 116954.00 112881.00   3214.61 o
   1   0  12  14381.20  14153.50   1341.35 o
   2   0  12    902.15   -242.83    716.93 <
   3   0  12   7406.29   8499.06   1110.08 o
   4   0  12   9401.25   9250.67   1167.90 o
   5   0  12  35591.80  34805.70   2197.04 o
   6   0  12    200.52    254.39    844.12 <
   7   0  12   8727.50  11759.90   1352.91 o
   8   0  12  11869.20  13771.90   1468.54 o
 -12   1  12  19665.90  15090.20   1734.50 o
 -11   1  12   8280.48   8198.41   1283.53 o
 -10   1  12   4921.07   6047.63   1144.77 o
  -9   1  12   1897.74   2173.91    936.63 <
  -8   1  12   9788.62   8660.94   1167.90 o
  -7   1  12   5442.72   5885.74   1006.01 o
  -6   1  12     38.59   -254.39    439.41 <
  -5   1  12  16462.20  16431.50    740.05 o
  -4   1  12   1640.33   1977.33    323.77 o
  -3   1  12  12518.10  12939.40    555.04 o
  -2   1  12  11214.00  11401.50    520.35 o
  -1   1  12  14048.90  13159.10    543.48 o
   0   1  12   3967.06   3087.41    335.34 o
   1   1  12    482.20   1318.22    670.67 <
   2   1  12    189.65    531.91    485.66 <
   3   1  12  32712.20  34516.60   1514.80 o
   4   1  12  19069.10  20189.60   1653.56 o
   5   1  12    443.11    786.31    763.18 <
   6   1  12   2698.18   2798.33    982.88 <
   7   1  12   8148.94  10834.90   1364.47 o
   8   1  12  19241.10  17518.50   1665.12 o
   9   1  12   5346.09   5481.02   1086.95 o
 -12   2  12   3874.76   4104.99    821.00 o
 -11   2  12     59.76  -1179.46    682.24 <
 -10   2  12    862.11   1456.98    647.55 <
  -9   2  12  10769.60   9701.64    890.38 o
  -8   2  12   3183.28   2798.33    635.98 o
  -7   2  12   3510.56   3515.26    474.10 o
  -6   2  12   1533.36   2150.78    439.41 o
  -5   2  12   4060.75   3619.33    404.72 o
  -4   2  12  24858.20  25219.70    832.56 o
  -3   2  12   1861.60   1734.50    300.65 o
  -2   2  12    250.26     69.38    265.96 <
  -1   2  12   8517.83   7770.57    381.59 o
   0   2  12   4694.46   4798.79    404.72 o
   1   2  12   8770.90   8707.20    612.86 o
   2   2  12    157.15    161.89    404.72 <
   3   2  12     23.90    439.41    450.97 <
   4   2  12   8902.14   8730.32    716.93 o
   5   2  12   1994.49    578.17    450.97 <
   6   2  12     63.06    821.00    890.38 <
   7   2  12      3.15    138.76    890.38 <
   8   2  12     13.53    416.28    867.25 <
 -11   3  12   2716.34   2266.42    751.62 o
 -10   3  12   9197.61   8129.03    901.94 o
  -9   3  12    387.80    323.77    624.42 <
  -8   3  12    420.74    173.45    416.28 <
  -7   3  12    869.77   1121.64    416.28 <
  -6   3  12   3696.09   4070.30    508.79 o
  -5   3  12   9036.77   8869.08    624.42 o
  -4   3  12    157.00     80.94    335.34 <
  -3   3  12  11694.80  11852.40    520.35 o
  -2   3  12   7430.99   7435.23    439.41 o
  -1   3  12   1576.45   2150.78    335.34 o
   0   3  12      3.68   -219.70    289.08 <
   1   3  12     65.70     69.38    404.72 <
   2   3  12   8348.11   8048.09    763.18 o
   3   3  12   3948.69   3815.90    635.98 o
   4   3  12    297.70    427.84    485.66 <
   5   3  12   7964.17   6729.87    728.49 o
   6   3  12    431.64   2301.11    994.45 <
   7   3  12    709.12   1306.66    994.45 <
 -11   4  12    241.87   -728.49    751.62 <
 -10   4  12    211.97   -242.83    624.42 <
  -9   4  12   6404.02   5307.57    578.17 o
  -8   4  12  19960.20  23196.10   1202.59 o
  -7   4  12   4391.67   3260.86    508.79 o
  -6   4  12   1087.38   1248.84    416.28 o
  -5   4  12  15566.10  15217.40    716.93 o
  -4   4  12   3999.67   3052.72    416.28 o
  -3   4  12   3384.16   3249.30    520.35 o
  -2   4  12   3343.06   3260.86    497.22 o
  -1   4  12     98.98   -312.21    323.77 <
   0   4  12  34852.00  40645.20   1630.43 o
   1   4  12    346.27    -80.94    404.72 <
   2   4  12   2566.19   1699.81    485.66 o
   3   4  12    161.33    601.29    682.24 <
   4   4  12   2255.45   2867.71    659.11 o
   5   4  12  12902.50  13309.40    971.32 o
   6   4  12   1182.58   1202.59    994.45 <
 -10   5  12   1376.47   1144.77    670.67 <
  -9   5  12    203.40  -1179.46    682.24 <
  -8   5  12   8397.68   7481.48    647.55 o
  -7   5  12   8897.57   9447.25    624.42 o
  -6   5  12   3215.55   2624.88    450.97 o
  -5   5  12   7739.66   7030.51    728.49 o
  -4   5  12   1115.63   1156.33    462.53 <
  -3   5  12   8987.22   9192.86    682.24 o
  -2   5  12    681.75    127.20    381.59 <
  -1   5  12  17379.40  15772.40    844.12 o
   0   5  12   3027.74   2798.33    520.35 o
   1   5  12   4809.14   3734.96    555.04 o
   2   5  12     39.71     46.25    474.10 <
   3   5  12  15166.20  16362.10    901.94 o
   4   5  12   7398.19   6845.50    821.00 o
   5   5  12     13.28   -104.07    763.18 <
  -8   6  12   3798.87   3815.90    959.76 o
  -7   6  12   6463.46   6810.81   1052.26 o
  -6   6  12    463.08   1086.95    659.11 <
  -5   6  12   7812.36   9493.50    959.76 o
  -4   6  12  37235.70  36713.60   1688.25 o
  -3   6  12    714.80    855.69    659.11 <
  -2   6  12    627.28    601.29    659.11 <
  -1   6  12  14706.60  16408.40   1098.52 o
   0   6  12   7120.82   6579.54    821.00 o
   1   6  12  12664.30  14789.50   1086.95 o
   2   6  12      1.45   -716.93    612.86 <
   3   6  12     15.13   1121.64    612.86 <
   4   6  12  19848.70  21519.40   1283.53 o
 -11   1  13   6165.95   4787.22   1260.40 o
 -10   1  13    578.84  -1260.40   1006.01 <
  -9   1  13    107.14   1214.15    913.50 <
  -8   1  13    192.02   -254.39    890.38 <
  -7   1  13   1240.20   2139.22    890.38 <
  -6   1  13  21137.30  21796.90   1110.08 o
  -5   1  13   3004.32   3075.85    531.91 o
  -4   1  13   6722.51   5885.74    450.97 o
  -3   1  13   4127.91   4879.73    404.72 o
  -2   1  13   3918.19   3977.79    381.59 o
  -1   1  13  16216.70  17206.30    774.74 o
   0   1  13   1585.54   1954.20    832.56 <
   1   1  13   7416.95   6845.50    797.87 o
   2   1  13  15731.50  16223.40   1514.80 o
   3   1  13  15419.70  15980.50   1537.92 o
   4   1  13     52.00   1387.60    855.69 <
   5   1  13    867.48   1549.49    855.69 <
   6   1  13     32.64   -705.36    925.07 <
   7   1  13   6729.49   7319.60   1271.97 o
 -11   2  13     61.60   -370.03    693.80 <
 -10   2  13   5597.26   5527.28    855.69 o
  -9   2  13  57055.50  62731.10   2347.36 o
  -8   2  13    348.48    578.17    612.86 <
  -7   2  13    940.95    797.87    404.72 <
  -6   2  13  11867.50   9782.59    670.67 o
  -5   2  13  11825.10  11702.10    716.93 o
  -4   2  13  31429.40  31776.10    982.88 o
  -3   2  13   1377.84   1456.98    358.46 o
  -2   2  13   4428.80   5168.81    462.53 o
  -1   2  13  34954.50  36690.50   1086.95 o
   0   2  13   7828.21   8048.09    809.43 o
   1   2  13   1389.79   1075.39    439.41 <
   2   2  13   1120.81   1607.30    520.35 o
   3   2  13   1265.86   1746.06    520.35 o
   4   2  13  17571.50  16396.80   1676.68 o
   5   2  13    116.13   -427.84    832.56 <
   6   2  13  22416.60  19172.00   1803.88 o
   7   2  13    100.24    878.81    948.19 <
 -11   3  13   6181.49   4532.83    821.00 o
 -10   3  13   7331.22   7897.76    913.50 o
  -9   3  13    339.28   -474.10    693.80 <
  -8   3  13   1305.45    971.32    462.53 <
  -7   3  13    588.46    705.36    439.41 <
  -6   3  13  33381.60  35534.20   1237.28 o
  -5   3  13  10734.60  10326.10    693.80 o
  -4   3  13    669.66    277.52    427.84 <
  -3   3  13   3365.62   2705.82    427.84 o
  -2   3  13  26013.40  26884.80    936.63 o
  -1   3  13  35023.60  37176.10   1133.21 o
   0   3  13   3366.54   3584.64    450.97 o
   1   3  13      1.82    242.83    427.84 <
   2   3  13  23165.20  22444.40    878.81 o
   3   3  13  33489.90  33429.60   1468.54 o
   4   3  13   4465.33   3827.47    647.55 o
   5   3  13    925.64    901.94   1006.01 <
   6   3  13   3510.96   3619.33   1086.95 o
 -10   4  13  11738.20  12580.90   1052.26 o
  -9   4  13   6087.00   7493.05    832.56 o
  -8   4  13   9862.80   8487.49    682.24 o
  -7   4  13    252.23   -520.35    462.53 <
  -6   4  13   1936.42   1896.39    485.66 o
  -5   4  13  29260.70  30723.80   1029.14 o
  -4   4  13   1658.60    832.56    404.72 <
  -3   4  13     26.35    393.15    393.15 <
  -2   4  13   1945.32   1792.32    416.28 o
  -1   4  13   1066.43   1364.47    416.28 o
   0   4  13   8710.14   9088.79    601.29 o
   1   4  13    188.22   -242.83    450.97 <
   2   4  13   6518.28   6302.02    578.17 o
   3   4  13   2496.13   2243.29    497.22 o
   4   4  13     71.83    -23.13    589.73 <
  -9   5  13    419.72    127.20    647.55 <
  -8   5  13    255.95   -300.65    508.79 <
  -7   5  13   8353.29   7192.40    659.11 o
  -6   5  13     12.02    -11.56    462.53 <
  -5   5  13   1822.76   2324.23    450.97 o
  -4   5  13  12943.10  12985.60    821.00 o
  -3   5  13    173.48   -878.81    520.35 <
  -2   5  13  10455.90  10071.70    728.49 o
  -1   5  13   4381.22   3145.23    555.04 o
   0   5  13    748.51    277.52    462.53 <
   1   5  13  16889.90  17206.30    913.50 o
   2   5  13    108.23    786.31    508.79 <
   3   5  13   1374.11    740.05    531.91 <
   4   5  13  11386.20  11540.20   1086.95 o
  -7   6  13   5757.94   8973.15    855.69 o
  -6   6  13     25.24    -46.25    601.29 <
  -5   6  13    154.66     80.94    647.55 <
  -4   6  13    650.64    127.20    659.11 <
  -3   6  13   3977.71   4463.45    786.31 o
  -2   6  13   3636.33   3700.27    751.62 o
  -1   6  13   4515.62   2890.84    728.49 o
   0   6  13   1141.89    381.59    612.86 <
   1   6  13    661.88    601.29    659.11 <
   2   6  13    861.09    323.77    670.67 <
   3   6  13    191.75    265.96    867.25 <
 -10   0  14  33865.40  38008.70   2509.25 o
  -9   0  14   3329.77   3283.99   1075.39 o
  -8   0  14   1652.56   3734.96   1040.70 o
  -7   0  14    104.85   -670.67    832.56 <
  -6   0  14    430.46   1063.83    832.56 <
  -5   0  14  30634.90  33892.20   2220.16 o
  -4   0  14   2120.85   1040.70    485.66 <
  -3   0  14  30550.20  28029.50   1364.47 o
  -2   0  14   4465.04   4070.30    670.67 o
  -1   0  14    134.16    670.67    589.73 <
   0   0  14   2220.32   1688.25    901.94 <
   1   0  14  11788.60  10985.20    948.19 o
   2   0  14  32931.80  37072.10   2347.36 o
   3   0  14   2278.54   2405.18    994.45 <
   4   0  14    275.75   -289.08    832.56 <
   5   0  14  31288.20  31359.80   2220.16 o
   6   0  14   7641.71   6764.56   1248.84 o
 -10   1  14  10557.60   7458.36   1399.16 o
  -9   1  14   1644.06    138.76    925.07 <
  -8   1  14    208.30   1503.23    925.07 <
  -7   1  14  33399.70  35534.20   2289.54 o
  -6   1  14  25819.80  25127.10   1896.39 o
  -5   1  14    710.87    427.84    520.35 <
  -4   1  14   3411.60   3145.23    624.42 o
  -3   1  14   7290.69   7504.61    786.31 o
  -2   1  14  41867.60  44542.00   1838.57 o
  -1   1  14  17534.40  18050.40   1144.77 o
   0   1  14   2569.03   2104.53    948.19 <
   1   1  14   8526.75  10684.50   1376.04 o
   2   1  14  18576.10  18825.10   1225.71 o
   3   1  14   4667.70   3943.10   1029.14 o
   4   1  14    611.40    300.65    913.50 <
   5   1  14   1249.07   1191.02    982.88 <
   6   1  14   3926.97   4602.21   1098.52 o
 -10   2  14    844.14    520.35    682.24 <
  -9   2  14   3218.73   2833.02    740.05 o
  -8   2  14    473.81   -208.14    670.67 <
  -7   2  14   1252.13    728.49    474.10 <
  -6   2  14   2159.40   2509.25    508.79 o
  -5   2  14     48.95   -242.83    462.53 <
  -4   2  14     82.91    -46.25    427.84 <
  -3   2  14    991.20    543.48    450.97 <
  -2   2  14   3375.53   5261.32    728.49 o
  -1   2  14    367.23    716.93    497.22 <
   0   2  14    388.23    277.52    578.17 <
   1   2  14   7213.39   6741.43    844.12 o
   2   2  14   1226.78    994.45    543.48 <
   3   2  14   2054.08    589.73    936.63 <
   4   2  14    926.82   1052.26    913.50 <
   5   2  14   1036.81   2127.66   1098.52 <
 -10   3  14     20.24   -589.73    716.93 <
  -9   3  14    204.67  -1029.14    763.18 <
  -8   3  14  10213.50   9135.04    728.49 o
  -7   3  14   3212.48   2948.65    555.04 o
  -6   3  14    186.46   -254.39    439.41 <
  -5   3  14   5196.79   5619.78    612.86 o
  -4   3  14     36.80   -462.53    485.66 <
  -3   3  14   2249.18   1722.94    624.42 <
  -2   3  14    740.40    566.60    404.72 <
  -1   3  14   1831.02   2220.16    450.97 o
   0   3  14  15225.40  14616.10    740.05 o
   1   3  14    529.53    104.07    474.10 <
   2   3  14   1051.21    474.10    462.53 <
   3   3  14   1702.58    716.93    566.60 <
   4   3  14    900.38   1086.95    936.63 <
  -9   4  14   1160.64    196.58    740.05 <
  -8   4  14   2403.70   2173.91    508.79 o
  -7   4  14    356.40    555.04    474.10 <
  -6   4  14    657.79    393.15    474.10 <
  -5   4  14  13676.90  14095.70    844.12 o
  -4   4  14   1366.05    855.69    462.53 <
  -3   4  14  13518.50  13771.90    740.05 o
  -2   4  14   2389.90   1734.50    462.53 o
  -1   4  14   3163.87   3515.26    520.35 o
   0   4  14    122.77   -104.07    416.28 <
   1   4  14   3985.26   3538.38    589.73 o
   2   4  14   8880.87   9516.63    763.18 o
   3   4  14   4646.60   4636.90    705.36 o
   4   4  14    860.37    913.50    797.87 <
  -8   5  14    253.40    531.91    659.11 <
  -7   5  14  12083.60  11505.50    786.31 o
  -6   5  14  15768.90  15691.50    867.25 o
  -5   5  14   1173.02    728.49    450.97 <
  -4   5  14    389.61    277.52    474.10 <
  -3   5  14   8960.51   7597.12    624.42 o
  -2   5  14  24415.40  23855.20    959.76 o
  -1   5  14   2698.68   2185.47    497.22 o
   0   5  14    440.78    150.32    474.10 <
   1   5  14   1088.87   1468.54    485.66 o
   2   5  14  15816.30  16454.60    948.19 o
   3   5  14   6567.34   8024.96    971.32 o
   4   5  14   1321.97    450.97   1075.39 <
  -6   6  14   8633.71   7886.20    867.25 o
  -5   6  14    102.58  -1283.53    682.24 <
  -4   6  14    894.60   1202.59    693.80 <
  -3   6  14   1726.42   2289.54    763.18 <
  -2   6  14   4202.90   3989.35    821.00 o
  -1   6  14   3340.41   2913.96    728.49 o
   0   6  14   1019.05    971.32    670.67 <
   1   6  14  15992.30  20501.80   1884.82 o
  -9   1  15   6185.01   6197.95   1329.78 o
  -8   1  15   7001.02   6776.12   1225.71 o
  -7   1  15   9600.53   8637.82   1295.09 o
  -6   1  15    182.97   -555.04    878.81 <
  -5   1  15    656.71    601.29    555.04 <
  -4   1  15   1843.99   2509.25    635.98 o
  -3   1  15   5077.29   4139.68    705.36 o
  -2   1  15  10630.50  12361.20   1006.01 o
  -1   1  15   7381.21   7874.64    867.25 o
   0   1  15     75.48    150.32    913.50 <
   1   1  15   1133.47    624.42    913.50 <
   2   1  15    121.83   -948.19    786.31 <
   3   1  15    515.19   1086.95    959.76 <
   4   1  15   7353.72   6984.26   1341.35 o
  -9   2  15   1704.01    728.49    682.24 <
  -8   2  15   8326.93   8487.49    936.63 o
  -7   2  15   9434.89   8961.59    716.93 o
  -6   2  15   7078.62   6591.11    693.80 o
  -5   2  15   1640.24   1641.99    531.91 o
  -4   2  15  44014.40  43154.40   1503.23 o
  -3   2  15   2865.42   2682.70    566.60 o
  -2   2  15   1597.07   2150.78    705.36 o
  -1   2  15    357.65    -46.25    531.91 <
   0   2  15   7787.72   7435.23    751.62 o
   1   2  15  47030.90  54879.60   2231.73 o
   2   2  15    112.20   -161.89    589.73 <
   3   2  15    420.65    566.60    601.29 <
   4   2  15   9745.05   6683.61   1283.53 o
  -9   3  15     11.82   -427.84    728.49 <
  -8   3  15  10782.10   8626.25    728.49 o
  -7   3  15  20821.90  17437.50    936.63 o
  -6   3  15   6118.59   7042.08    682.24 o
  -5   3  15     42.22    -92.51    508.79 <
  -4   3  15     22.48   -682.24    555.04 <
  -3   3  15  15703.30  16339.00    936.63 o
  -2   3  15  11403.70  12685.00    867.25 o
  -1   3  15   2659.74   1121.64    566.60 <
   0   3  15    863.77   1433.85    566.60 <
   1   3  15   1595.35   1977.33    740.05 <
   2   3  15   3816.99   4902.86    728.49 o
   3   3  15    222.59   -485.66    774.74 <
  -8   4  15  10994.20  11771.50   1052.26 o
  -7   4  15    434.02    -23.13    520.35 <
  -6   4  15   2305.58   1873.26    531.91 o
  -5   4  15   2231.54   1607.30    543.48 <
  -4   4  15   6744.51   6313.58    705.36 o
  -3   4  15  20264.60  20559.60    913.50 o
  -2   4  15    265.92   -497.22    520.35 <
  -1   4  15   2557.46   2775.20    520.35 o
   0   4  15  18460.70  19102.60    890.38 o
   1   4  15   6747.15   8580.00    763.18 o
   2   4  15   7582.19   9736.33   1063.83 o
   3   4  15   1660.72   2058.27    844.12 <
  -7   5  15   1902.39   1121.64    543.48 <
  -6   5  15   4047.57   4451.89    635.98 o
  -5   5  15    119.37   -612.86    555.04 <
  -4   5  15   5516.36   5342.26    601.29 o
  -3   5  15    269.91    323.77    497.22 <
  -2   5  15    377.48    335.34    497.22 <
  -1   5  15   6185.24   6325.15    705.36 o
   0   5  15    200.20   -450.97    589.73 <
   1   5  15     32.48    -69.38    716.93 <
   2   5  15    774.58   1295.09    740.05 <
  -8   0  16  35875.40  34817.20   2428.30 o
  -7   0  16      9.30   -300.65    948.19 <
  -6   0  16    934.94    901.94    925.07 <
  -5   0  16  32583.40  32886.10   2335.80 o
  -4   0  16  15210.80  16466.20   1688.25 o
  -3   0  16  11345.30  11297.40   1514.80 o
  -2   0  16     12.34    312.21    971.32 <
  -1   0  16    728.38   1110.08    994.45 <
   0   0  16  43890.00  50716.80   3064.29 o
   1   0  16   3358.12   3850.59    809.43 o
   2   0  16    521.85    370.03    705.36 <
   3   0  16   2123.32   3006.47   1214.15 <
  -8   1  16   3982.59   4405.63   1248.84 o
  -7   1  16   1140.75    450.97    971.32 <
  -6   1  16    205.57   1040.70   1006.01 <
  -5   1  16  10718.30  13783.50   1618.87 o
  -4   1  16      8.80    335.34    682.24 <
  -3   1  16   4670.77   4243.75    786.31 o
  -2   1  16   7295.93   5411.64    832.56 o
  -1   1  16   8996.42   9123.48    982.88 o
   0   1  16   3313.83   3237.74    797.87 o
   1   1  16     13.88  -1491.67   1121.64 <
   2   1  16     32.44    797.87    774.74 <
  -8   2  16   1888.03   1595.74    751.62 <
  -7   2  16   3555.38   2370.49    751.62 o
  -6   2  16   1061.79    647.55    543.48 <
  -5   2  16   3407.17   2567.06    601.29 o
  -4   2  16   8881.54  10233.60    809.43 o
  -3   2  16    318.57   -254.39    601.29 <
  -2   2  16    976.98    763.18    531.91 <
  -1   2  16   4015.64   3746.52    809.43 o
   0   2  16   2248.86   1803.88    635.98 <
   1   2  16   2806.53   3943.10    855.69 o
   2   2  16     17.48   -659.11    659.11 <
  -8   3  16     79.73   -289.08    705.36 <
  -7   3  16    495.00    716.93    566.60 <
  -6   3  16   2365.49   2474.56    612.86 o
  -5   3  16   5010.61   5515.71    693.80 o
  -4   3  16     58.13   -335.34    578.17 <
  -3   3  16   4960.19   3734.96    867.25 o
  -2   3  16   3138.74   3411.19    647.55 o
  -1   3  16    248.67    265.96    566.60 <
   0   3  16    102.60    936.63    612.86 <
   1   3  16     58.62   1133.21    786.31 <
  -7   4  16   2725.62   2520.81    994.45 <
  -6   4  16   1204.69    867.25    531.91 <
  -5   4  16   9243.43   8580.00    786.31 o
  -4   4  16   2986.49   3642.45    670.67 o
  -3   4  16   1831.42   1907.95    589.73 o
  -2   4  16   2557.24   1063.83    601.29 <
  -1   4  16    209.14   1110.08    763.18 <
   0   4  16  15830.90  19680.80   1341.35 o
  -6   5  16   1915.97   1907.95    959.76 <
  -4   5  16    239.18   -682.24    751.62 <
  -3   5  16   3473.28   3318.68    647.55 o
  -2   5  16    496.16    277.52    624.42 <
  -1   5  16  10779.40  12488.40   1561.05 o
  -6   1  17  14749.50  17368.10   1838.57 o
  -5   1  17   2484.54   -312.21   1121.64 <
  -4   1  17   2828.64   4243.75   1283.53 o
  -3   1  17   3467.38   2173.91    786.31 <
  -2   1  17   2599.52   1341.35    740.05 <
  -1   1  17   6945.90   6313.58    959.76 o
   0   1  17   1410.46   2382.05    867.25 <
  -6   2  17   3685.12   3018.03   1029.14 <
  -5   2  17   4816.18   3411.19    670.67 o
  -4   2  17  12205.40  13436.60    925.07 o
  -3   2  17   2214.67    601.29    647.55 <
  -2   2  17   3992.25   3630.89    705.36 o
  -1   2  17  12744.20  11401.50    925.07 o
  -7   3  17   1256.89   1156.33    901.94 <
  -6   3  17  18052.70  17136.90   1630.43 o
  -5   3  17   7186.68   9932.91   1364.47 o
  -4   3  17      7.65   -150.32    936.63 <
  -3   3  17   1832.57   1144.77    774.74 <
  -6   4  17    605.74   1838.57   1006.01 <
  -5   2  18     36.64    138.76    913.50 <

loop_
 _twin_refln_datum_id
 _twin_refln_individual_id
 _twin_refln_index_h
 _twin_refln_index_k
 _twin_refln_index_l
 _twin_refln_F_squared_calc
 _twin_refln_F_squared_meas
 _twin_refln_F_squared_sigma
 _twin_refln_include_status
 ? ? ? ? ? ? ? ? ?
