# Supplementary material
Source: MDPI journal article supplement (https://www.mdpi.com/2073-8994/15/4/918)
Supplement: s1 [file s1 › BaBi16Eu04B4O10.cif]

#=======================================================================
data_global
#=======================================================================

_audit_creation_method                   'Jana2006 Version : 25/10/2015'


# 1. PROCESSING SUMMARY (IUCr Office Use Only)

_journal_date_recd_electronic            ?
_journal_date_to_coeditor                ?
_journal_date_from_coeditor              ?
_journal_date_accepted                   ?
_journal_date_printers_first             ?
_journal_date_printers_final             ?
_journal_date_proofs_out                 ?
_journal_date_proofs_in                  ?
_journal_coeditor_name                   ?
_journal_coeditor_code                   ?
_journal_coeditor_notes
; ?
;
_journal_techeditor_code                 ?
_journal_paper_category                  ?
_journal_techeditor_notes
; ?
;
_journal_coden_ASTM                      ?
_journal_name_full                       'Acta Crystallographica Section C'
_journal_year                            ?
_journal_volume                          ?
_journal_issue                           ?
_journal_page_first                      ?
_journal_page_last                       ?
_journal_suppl_publ_number               ?
_journal_suppl_publ_pages                ?

#=======================================================================

# 2. SUBMISSION DETAILS

_publ_contact_author_name                ?
_publ_contact_author_address
; ?
;
_publ_contact_author_email               ?
_publ_contact_author_fax                 ?
_publ_contact_author_phone               ?

_publ_requested_journal                  'Acta Crystallographica Section C'
_publ_requested_category                 ?

_publ_contact_letter
; ?
;

#=======================================================================

# 3. TITLE AND AUTHOR LIST

_publ_section_title
; ?
;
_publ_section_title_footnote
; ?
;
loop_
 _publ_author_name
 _publ_author_footnote
 _publ_author_address
; ?      # name
;
; ?      # footnote
;
; ?      # address
;

#=======================================================================

# 4. TEXT

_publ_section_synopsis
; ?
;
_publ_section_abstract
; ?
;
_publ_section_comment
; ?
;
_publ_section_introduction
; ?
;
_publ_section_experimental
; ?
;
_publ_section_exptl_prep
; ?
;
_publ_section_exptl_refinement
; ?
;
_publ_section_exptl_solution
; ?
;
_publ_section_discussion
; ?
;
_publ_section_acknowledgements
; ?
;
_publ_section_references
;
Petricek, V., Dusek, M. & Palatinus L. (2014). Z. Kristallogr. 229(5), 345-352.

Palatinus L. & Chapuis G. (2007). J. Appl. Cryst. 40, 786-790.

# enable this reference if Diamond ver. 2 was used for visualization
#Brandenburg, K. (1999). DIAMOND. Version. 2.1c.
#Crystal Impact GbR, Bonn, Germany.

# enable this reference if Diamond ver. 3 was used for visualization
#Brandenburg, K. & Putz, H. (2005). DIAMOND Version 3.
#Crystal Impact GbR, Postfach 1251, D-53002 Bonn, Germany.

# enable this reference if SIR97 was used for solving of the structure
#Altomare, A., Burla, M. C., Camalli, M., Cascarano, G., Giacovazzo, C.,
#Guagliardi, A., Moliterni, A. G. G., Polidori, G., Spagna, R. (1997).
#SIR97. A Package for Crystal Structure Solution by Direct Methods
#and Refinement, Bari, Rome, Italy.

# use this reference if SIR2002 was used for solving of the structure
#Burla, M.C., Camalli, M., Carrozzini, B., Cascarano, G., Giacovazzo, C.,
#Polidori, G., Spagna, R.
#SIR2002: the program, J. Appl. Cryst, (2003). 36, 1103


# use this reference if SIR2011 was used for solving of the structure
#Burla, M.C., Caliandro, R., Camalli, M., Carrozzini, B., Cascarano,
#G.L., Giacovazzo, C., Mallamo. M., Mazzone, A., Polidori, G., Spagna, R.
#SIR2011: a new package for crystal structure determination and refinement,
#J.Appl.Cryst. (2012) 45, 357-361

# enable this reference if bond valences were calculated
#Brown, I. D. (1996). J. Appl. Cryst. 29, 479-480.

# enable this reference if Xshape wase used for crystal shape refinement
#Stoe & Cie (1998). X-SHAPE. Stoe & Cie, Darmstadt, Germany.


# enable this reference if Flack coefficient was refined
#Flack, H. D. (1983). Acta Cryst. A39, 876-881.
;
_publ_section_figure_captions
; ?
;
_publ_section_table_legends
; ?
;

#=======================================================================
data_I
#=======================================================================

# 5. CHEMICAL DATA

_chemical_name_systematic
; ?
;
_chemical_name_common                    ?
_chemical_formula_moiety                 ?
_chemical_formula_structural             ?
_chemical_formula_analytical             ?
_chemical_formula_iupac                  ?
_chemical_formula_sum                    'B4 Ba1 Bi1.574 Eu0.426 O10'
_chemical_formula_weight                 734.2
_chemical_melting_point                  ?
_chemical_compound_source                ?
_chemical_absolute_configuration         .

#=======================================================================

# 6. CRYSTAL DATA

_symmetry_cell_setting                   monoclinic
_symmetry_space_group_name_H-M           'P 1 21/c 1'
_symmetry_space_group_name_Hall          '-P 2ycb'
_symmetry_Int_Tables_number              14

loop_
 _space_group_symop_id
 _space_group_symop_operation_xyz
 1   x,y,z
 2   -x,y+1/2,-z+1/2
 3   -x,-y,-z
 4   x,-y+1/2,z+1/2

_cell_length_a                           10.2360(16)
_cell_length_b                           6.3962(9)
_cell_length_c                           12.3912(18)
_cell_angle_alpha                        90
_cell_angle_beta                         102.424(12)
_cell_angle_gamma                        90
_cell_volume                             792.3(2)

loop_
 _twin_individual_id
 _twin_individual_mass_fraction_refined
 _twin_individual_twin_matrix_11
 _twin_individual_twin_matrix_12
 _twin_individual_twin_matrix_13
 _twin_individual_twin_matrix_21
 _twin_individual_twin_matrix_22
 _twin_individual_twin_matrix_23
 _twin_individual_twin_matrix_31
 _twin_individual_twin_matrix_32
 _twin_individual_twin_matrix_33
 ? ? ? ? ? ? ? ? ? ? ?

_cell_formula_units_Z                    4

_cell_measurement_reflns_used            5194
_cell_measurement_theta_min              3.54
_cell_measurement_theta_max              33.86
_cell_measurement_temperature            293
_cell_special_details
; ?
;

_exptl_crystal_density_diffrn            6.1556
_exptl_crystal_density_meas              ?
_exptl_crystal_density_method            ?
_exptl_crystal_F_000                     1254

_exptl_absorpt_coefficient_mu            43.169
_exptl_crystal_description               prizm
_exptl_crystal_size_max                  0.06
_exptl_crystal_size_mid                  0.04
_exptl_crystal_size_min                  0.02
_exptl_crystal_size_rad                  ?
_exptl_crystal_colour                    yellow
_exptl_absorpt_correction_type           'multi-scan'
_exptl_absorpt_process_details
;
CrysAlisPro 1.171.41.104a (Rigaku Oxford Diffraction, 2021)
Empirical absorption correction using spherical harmonics,
implemented in SCALE3 ABSPACK scaling algorithm.
;
_exptl_absorpt_correction_T_min          0.38
_exptl_absorpt_correction_T_max          1
loop_
 _exptl_crystal_face_index_h
 _exptl_crystal_face_index_k
 _exptl_crystal_face_index_l
 _exptl_crystal_face_perp_dist
 ? ? ? ?

#=======================================================================

# 7. EXPERIMENTAL DATA

_exptl_special_details                   ?

_diffrn_ambient_temperature              293
_diffrn_source                           'micro-focus sealed X-ray tube'
_diffrn_source_power                     ?
_diffrn_source_voltage                   ?
_diffrn_source_current                   ?
_diffrn_radiation_type                   'Mo K\a'
_diffrn_radiation_source                 'X-ray tube'
_diffrn_radiation_wavelength             0.71073
_diffrn_radiation_monochromator          'mirror'
_diffrn_measurement_device               'four-circle diffractometer'
_diffrn_measurement_device_type          'XtaLAB Synergy, Single source at home/near, HyPix'
_diffrn_detector                         'Hybrid Pixel Array Detector'
_diffrn_detector_area_resol_mean         10.0000
_diffrn_measurement_method               '\w scans'
_diffrn_measurement_specimen_support     ?

_diffrn_reflns_number                    8343
_diffrn_reflns_theta_min                 3.37
_diffrn_reflns_theta_max                 33.51
_diffrn_reflns_theta_full                31.09
_diffrn_measured_fraction_theta_max      0.86
_diffrn_measured_fraction_theta_full     0.98
_diffrn_reflns_av_R_equivalents          0.0332
_diffrn_reflns_av_unetI/netI             0.0377
_diffrn_reflns_limit_h_min               -14
_diffrn_reflns_limit_h_max               15
_diffrn_reflns_limit_k_min               -9
_diffrn_reflns_limit_k_max               6
_diffrn_reflns_limit_l_min               -17
_diffrn_reflns_limit_l_max               12
_diffrn_reflns_reduction_process         ?

_diffrn_standards_number                 ?
_diffrn_standards_interval_count         ?
_diffrn_standards_interval_time          ?
_diffrn_standards_decay_%                ?
loop_
_diffrn_standard_refln_index_h
_diffrn_standard_refln_index_k
_diffrn_standard_refln_index_l
  ? ? ?

_diffrn_radiation_probe                  X-ray

#=======================================================================

# 8. REFINEMENT DATA

_refine_special_details
; ?
;

_reflns_number_total                     2681
_reflns_number_gt                        2083
_reflns_threshold_expression             'I>3\s(I)'

_refine_ls_structure_factor_coef         F
_refine_ls_R_factor_gt                   0.0269
_refine_ls_wR_factor_gt                  0.0281
_refine_ls_R_factor_all                  0.0414
_refine_ls_wR_factor_ref                 0.0299
_refine_ls_goodness_of_fit_ref           1.22
_refine_ls_goodness_of_fit_gt            1.32
_refine_ls_restrained_S_gt               ?
_refine_ls_restrained_S_all              ?
_refine_ls_number_reflns                 2681
_refine_ls_number_parameters             156
_refine_ls_number_restraints             1
_refine_ls_number_constraints            18
_refine_ls_weighting_scheme              sigma
_refine_ls_weighting_details             'w=1/(\s^2^(F)+0.0001F^2^)'
_refine_ls_hydrogen_treatment            ?
_refine_ls_shift/su_max                  0.0321
_refine_ls_shift/su_mean                 0.0025
_refine_diff_density_max                 ?
_refine_diff_density_min                 ?
_refine_ls_extinction_method             'none'
_refine_ls_extinction_coef               ?
_refine_ls_abs_structure_details         ?
_refine_ls_abs_structure_Flack           ?
_refine_ls_abs_structure_Rogers          ?

loop_
 _atom_type_symbol
 _atom_type_scat_dispersion_real
 _atom_type_scat_dispersion_imag
 _atom_type_scat_source
 B    0.0013  0.0007
 'International Tables Vol C tables 4.2.6.8 and 6.1.1.1'
 Ba  -0.3244  2.2819
 'International Tables Vol C tables 4.2.6.8 and 6.1.1.1'
 Bi  -4.1077 10.2566
 'International Tables Vol C tables 4.2.6.8 and 6.1.1.1'
 Eu  -0.1578  3.6682
 'International Tables Vol C tables 4.2.6.8 and 6.1.1.1'
 O    0.0106  0.0060
 'International Tables Vol C tables 4.2.6.8 and 6.1.1.1'

_computing_data_collection
 'CrysAlisPro 1.171.41.104a (Rigaku OD, 2021)'
_computing_cell_refinement
 'CrysAlisPro 1.171.41.104a (Rigaku OD, 2021)'
_computing_data_reduction
 'CrysAlisPro 1.171.41.104a (Rigaku OD, 2021)'
_computing_structure_solution            ?
_computing_structure_refinement          ?
_computing_molecular_graphics            ?
_computing_publication_material          ?

loop_
 _restr_distance_atom_site_label_1
 _restr_distance_site_symmetry_1
 _restr_distance_atom_site_label_2
 _restr_distance_site_symmetry_2
 _restr_distance_target
 _restr_distance_target_weight_param
B3 . O2 . 1.52 0.02

loop_
 _restr_angle_atom_site_label_1
 _restr_angle_site_symmetry_1
 _restr_angle_atom_site_label_2
 _restr_angle_site_symmetry_2
 _restr_angle_atom_site_label_3
 _restr_angle_site_symmetry_3
 _restr_angle_target
 _restr_angle_target_weight_param
 ? ? ? ? ? ? ? ?

loop_
 _restr_torsion_atom_site_label_1
 _restr_torsion_site_symmetry_1
 _restr_torsion_atom_site_label_2
 _restr_torsion_site_symmetry_2
 _restr_torsion_atom_site_label_3
 _restr_torsion_site_symmetry_3
 _restr_torsion_atom_site_label_4
 _restr_torsion_site_symmetry_4
 _restr_torsion_angle_target
 _restr_torsion_weight_param
 ? ? ? ? ? ? ? ? ? ?

loop_
 _restr_equal_distance_atom_site_label_1
 _restr_equal_distance_site_symmetry_1
 _restr_equal_distance_atom_site_label_2
 _restr_equal_distance_site_symmetry_2
 _restr_equal_distance_class_class_id
 _restr_equal_distance_class_target_weight_param
 ? ? ? ? ? ?

loop_
 _restr_equal_angle_atom_site_label_1
 _restr_equal_angle_site_symmetry_1
 _restr_equal_angle_atom_site_label_2
 _restr_equal_angle_site_symmetry_2
 _restr_equal_angle_atom_site_label_3
 _restr_equal_angle_site_symmetry_3
 _restr_equal_angle_class_class_id
 _restr_equal_angle_class_target_weight_param
 ? ? ? ? ? ? ? ?

loop_
 _restr_equal_torsion_atom_site_label_1
 _restr_equal_torsion_site_symmetry_1
 _restr_equal_torsion_atom_site_label_2
 _restr_equal_torsion_site_symmetry_2
 _restr_equal_torsion_atom_site_label_3
 _restr_equal_torsion_site_symmetry_3
 _restr_equal_torsion_atom_site_label_4
 _restr_equal_torsion_site_symmetry_4
 _restr_equal_torsion_class_class_id
 _restr_equal_torsion_class_target_weight_param
 ? ? ? ? ? ? ? ? ? ?


#=======================================================================

# 9. ATOMIC COORDINATES AND DISPLACEMENT PARAMETERS

loop_
 _atom_site_label
 _atom_site_type_symbol
 _atom_site_fract_x
 _atom_site_fract_y
 _atom_site_fract_z
 _atom_site_adp_type
 _atom_site_U_iso_or_equiv
 _atom_site_site_symmetry_multiplicity
 _atom_site_occupancy
 _atom_site_calc_flag
 _atom_site_refinement_flags
 _atom_site_disorder_assembly
 _atom_site_disorder_group
  Bi1 Bi 0.48200(3) 0.17168(4) 0.11937(2) Uani 0.01249(9) 4 0.686(9) d . . .
  Eu1' Eu 0.48200(3) 0.17168(4) 0.11937(2) Uani 0.01249(9) 4 0.314(9) d . . .
  Bi2 Bi 0.73039(3) 0.14451(4) 0.37388(2) Uani 0.01211(9) 4 0.888(9) d . . .
  Eu2' Eu 0.73039(3) 0.14451(4) 0.37388(2) Uani 0.01211(9) 4 0.112(9) d . . .
  Ba1 Ba 0.12748(4) 0.09774(6) -0.12555(3) Uani 0.01208(13) 4 1 d . . .
  O1 O 0.3126(5) 0.4445(6) -0.1063(4) Uani 0.0140(15) 4 1 d . . .
  O2 O 0.2902(5) 0.2822(8) 0.2227(5) Uani 0.0260(19) 4 1 d . . .
  O3 O 0.5570(5) -0.1368(7) 0.0909(4) Uani 0.0197(17) 4 1 d . . .
  O4 O -0.1361(5) -0.0053(7) -0.2313(4) Uani 0.0147(15) 4 1 d . . .
  O5 O 0.7278(5) 0.4943(7) 0.4089(4) Uani 0.0182(16) 4 1 d . . .
  O6 O 0.4970(5) 0.0788(8) 0.2956(4) Uani 0.0206(17) 4 1 d . . .
  O7 O 0.1266(5) -0.3287(7) -0.1003(4) Uani 0.0142(15) 4 1 d . . .
  O8 O 0.7127(4) 0.2188(7) 0.2024(4) Uani 0.0126(14) 4 1 d . . .
  O9 O 0.9461(5) 0.0766(7) 0.3644(4) Uani 0.0162(16) 4 1 d . . .
  O10 O 0.0872(5) 0.2282(7) 0.0753(4) Uani 0.0180(16) 4 1 d . . .
  B1 B -0.1963(8) -0.1257(12) -0.1565(7) Uani 0.015(2) 4 1 d . . .
  B2 B 0.0062(7) 0.3856(11) 0.1046(6) Uani 0.011(2) 4 1 d . . .
  B3 B 0.3906(8) 0.1968(13) 0.3336(8) Uani 0.024(3) 4 1 d . . .
  B4 B 0.2162(7) 0.5920(11) -0.1721(6) Uani 0.011(2) 4 1 d . . .

loop_
 _atom_site_aniso_label
 _atom_site_aniso_type_symbol
 _atom_site_aniso_U_11
 _atom_site_aniso_U_22
 _atom_site_aniso_U_33
 _atom_site_aniso_U_12
 _atom_site_aniso_U_13
 _atom_site_aniso_U_23
 Bi1 Bi 0.01067(14) 0.01175(15) 0.01586(17) 0.00094(9) 0.00461(11) -0.00087(9)
 Eu1' Eu 0.01067(14) 0.01175(15) 0.01586(17) 0.00094(9) 0.00461(11) -0.00087(9)
 Bi2 Bi 0.01023(13) 0.01095(14) 0.01596(16) -0.00134(9) 0.00461(10) 0.00036(9)
 Eu2' Eu 0.01023(13) 0.01095(14) 0.01596(16) -0.00134(9) 0.00461(10) 0.00036(9)
 Ba1 Ba 0.0115(2) 0.0100(2) 0.0157(2) -0.00048(13) 0.00515(15) -0.00084(13)
 O1 O 0.012(2) 0.010(2) 0.020(3) 0.0019(17) 0.005(2) -0.0010(18)
 O2 O 0.014(2) 0.013(3) 0.053(4) -0.0021(19) 0.012(3) -0.009(2)
 O3 O 0.023(3) 0.016(3) 0.022(3) 0.0125(19) 0.010(2) 0.010(2)
 O4 O 0.011(2) 0.015(2) 0.018(3) -0.0013(17) 0.003(2) 0.0047(18)
 O5 O 0.014(2) 0.018(3) 0.025(3) -0.0061(18) 0.011(2) 0.001(2)
 O6 O 0.012(2) 0.029(3) 0.022(3) -0.001(2) 0.007(2) -0.008(2)
 O7 O 0.012(2) 0.013(2) 0.020(3) -0.0039(17) 0.009(2) -0.0023(18)
 O8 O 0.008(2) 0.012(2) 0.018(3) -0.0025(16) 0.0037(19) 0.0029(18)
 O9 O 0.011(2) 0.009(2) 0.029(3) -0.0015(17) 0.007(2) 0.0001(19)
 O10 O 0.024(3) 0.018(2) 0.016(3) 0.013(2) 0.013(2) 0.0051(19)
 B1 B 0.016(4) 0.015(4) 0.012(4) -0.001(3) 0.001(3) 0.000(3)
 B2 B 0.007(3) 0.012(3) 0.014(4) 0.006(2) 0.004(3) 0.004(3)
 B3 B 0.016(4) 0.023(4) 0.037(6) -0.004(3) 0.013(4) -0.011(4)
 B4 B 0.005(3) 0.011(3) 0.017(4) -0.002(2) 0.002(3) 0.001(3)

loop_
 _jana_atom_site_ADP_C_label
 _jana_atom_site_ADP_C_type_symbol
 _jana_atom_site_ADP_C_111
 _jana_atom_site_ADP_C_112
 _jana_atom_site_ADP_C_113
 _jana_atom_site_ADP_C_122
 _jana_atom_site_ADP_C_123
 _jana_atom_site_ADP_C_133
 _jana_atom_site_ADP_C_222
 _jana_atom_site_ADP_C_223
 _jana_atom_site_ADP_C_233
 _jana_atom_site_ADP_C_333
 ? ? ? ? ? ? ? ? ? ? ? ?

loop_
 _jana_atom_site_ADP_D_label
 _jana_atom_site_ADP_D_type_symbol
 _jana_atom_site_ADP_D_1111
 _jana_atom_site_ADP_D_1112
 _jana_atom_site_ADP_D_1113
 _jana_atom_site_ADP_D_1122
 _jana_atom_site_ADP_D_1123
 _jana_atom_site_ADP_D_1133
 _jana_atom_site_ADP_D_1222
 _jana_atom_site_ADP_D_1223
 _jana_atom_site_ADP_D_1233
 _jana_atom_site_ADP_D_1333
 _jana_atom_site_ADP_D_2222
 _jana_atom_site_ADP_D_2223
 _jana_atom_site_ADP_D_2233
 _jana_atom_site_ADP_D_2333
 _jana_atom_site_ADP_D_3333
 ? ? ? ? ? ? ? ? ? ? ? ? ? ? ? ? ?

loop_
 _jana_atom_site_ADP_E_label
 _jana_atom_site_ADP_E_type_symbol
 _jana_atom_site_ADP_E_11111
 _jana_atom_site_ADP_E_11112
 _jana_atom_site_ADP_E_11113
 _jana_atom_site_ADP_E_11122
 _jana_atom_site_ADP_E_11123
 _jana_atom_site_ADP_E_11133
 _jana_atom_site_ADP_E_11222
 _jana_atom_site_ADP_E_11223
 _jana_atom_site_ADP_E_11233
 _jana_atom_site_ADP_E_11333
 _jana_atom_site_ADP_E_12222
 _jana_atom_site_ADP_E_12223
 _jana_atom_site_ADP_E_12233
 _jana_atom_site_ADP_E_12333
 _jana_atom_site_ADP_E_13333
 _jana_atom_site_ADP_E_22222
 _jana_atom_site_ADP_E_22223
 _jana_atom_site_ADP_E_22233
 _jana_atom_site_ADP_E_22333
 _jana_atom_site_ADP_E_23333
 _jana_atom_site_ADP_E_33333
 ? ? ? ? ? ? ? ? ? ? ? ? ? ? ? ? ? ? ? ? ? ? ?

loop_
 _jana_atom_site_ADP_F_label
 _jana_atom_site_ADP_F_type_symbol
 _jana_atom_site_ADP_F_111111
 _jana_atom_site_ADP_F_111112
 _jana_atom_site_ADP_F_111113
 _jana_atom_site_ADP_F_111122
 _jana_atom_site_ADP_F_111123
 _jana_atom_site_ADP_F_111133
 _jana_atom_site_ADP_F_111222
 _jana_atom_site_ADP_F_111223
 _jana_atom_site_ADP_F_111233
 _jana_atom_site_ADP_F_111333
 _jana_atom_site_ADP_F_112222
 _jana_atom_site_ADP_F_112223
 _jana_atom_site_ADP_F_112233
 _jana_atom_site_ADP_F_112333
 _jana_atom_site_ADP_F_113333
 _jana_atom_site_ADP_F_122222
 _jana_atom_site_ADP_F_122223
 _jana_atom_site_ADP_F_122233
 _jana_atom_site_ADP_F_122333
 _jana_atom_site_ADP_F_123333
 _jana_atom_site_ADP_F_133333
 _jana_atom_site_ADP_F_222222
 _jana_atom_site_ADP_F_222223
 _jana_atom_site_ADP_F_222233
 _jana_atom_site_ADP_F_222333
 _jana_atom_site_ADP_F_223333
 _jana_atom_site_ADP_F_233333
 _jana_atom_site_ADP_F_333333
 ? ? ? ? ? ? ? ? ? ? ? ? ? ? ? ? ? ? ? ? ? ? ? ? ? ? ? ? ? ?


#=======================================================================

# 10. MOLECULAR GEOMETRY


loop_
 _geom_bond_atom_site_label_1
 _geom_bond_atom_site_label_2
 _geom_bond_site_symmetry_1
 _geom_bond_site_symmetry_2
 _geom_bond_distance
 _geom_bond_publ_flag
  Bi1 O2 . . 2.660(6) ?
  Bi1 O3 . . 2.174(5) ?
  Bi1 O3 . 3_655 2.559(5) ?
  Bi1 O5 . 2_645 2.387(5) ?
  Bi1 O6 . . 2.236(5) ?
  Bi1 O6 . 2_655 2.800(5) ?
  Bi1 O8 . . 2.384(4) ?
  Bi2 O2 . 2_645 2.596(5) ?
  Bi2 O5 . . 2.280(5) ?
  Bi2 O6 . . 2.414(5) ?
  Bi2 O7 . 2_655 2.877(5) ?
  Bi2 O8 . . 2.147(5) ?
  Bi2 O9 . . 2.278(5) ?
  Ba1 O1 . . 2.894(4) ?
  Ba1 O2 . 4_554 2.872(6) ?
  Ba1 O4 . . 2.812(4) ?
  Ba1 O5 . 2_645 2.851(5) ?
  Ba1 O7 . . 2.746(4) ?
  Ba1 O8 . 3_655 2.890(5) ?
  Ba1 O9 . 4_454 2.775(5) ?
  Ba1 O10 . . 2.739(5) ?
  B1 O1 . 2_544 2.958(9) ?
  B1 O2 . 3_555 1.503(9) ?
  B1 O4 . . 1.442(10) ?
  B1 O5 . 4_454 1.495(10) ?
  B1 O10 . 3_555 1.485(9) ?
  B2 O4 . 4_555 2.849(10) ?
  B2 O7 . 3_555 1.397(9) ?
  B2 O9 . 2_655 1.341(8) ?
  B2 O9 . 4_454 2.916(9) ?
  B2 O10 . . 1.401(9) ?
  B3 O1 . 4_555 1.505(11) ?
  B3 O2 . . 1.623(10) ?
  B3 O3 . 2_655 1.442(10) ?
  B3 O4 . 3_555 2.911(9) ?
  B3 O6 . . 1.482(11) ?
  B4 O1 . . 1.478(8) ?
  B4 O2 . 4_554 2.903(9) ?
  B4 O4 . 2_554 1.438(8) ?
  B4 O7 . 1_565 1.498(10) ?
  B4 O8 . 3_665 1.500(9) ?

loop_
 _geom_angle_atom_site_label_1
 _geom_angle_atom_site_label_2
 _geom_angle_atom_site_label_3
 _geom_angle_site_symmetry_1
 _geom_angle_site_symmetry_2
 _geom_angle_site_symmetry_3
 _geom_angle
 _geom_angle_publ_flag
  O2 Bi1 O3 . . . 129.98(19) ?
  O2 Bi1 O3 . . 3_655 122.93(17) ?
  O2 Bi1 O5 . . 2_645 57.53(16) ?
  O2 Bi1 O6 . . . 60.21(17) ?
  O2 Bi1 O6 . . 2_655 64.95(15) ?
  O2 Bi1 O8 . . . 121.60(16) ?
  O3 Bi1 O3 . . 3_655 74.86(17) ?
  O3 Bi1 O5 . . 2_645 83.26(18) ?
  O3 Bi1 O6 . . . 88.00(19) ?
  O3 Bi1 O6 . . 2_655 154.71(16) ?
  O3 Bi1 O8 . . . 80.40(17) ?
  O3 Bi1 O5 3_655 . 2_645 82.58(18) ?
  O3 Bi1 O6 3_655 . . 159.05(16) ?
  O3 Bi1 O6 3_655 . 2_655 116.53(15) ?
  O3 Bi1 O8 3_655 . . 111.93(17) ?
  O5 Bi1 O6 2_645 . . 83.54(18) ?
  O5 Bi1 O6 2_645 . 2_655 119.42(16) ?
  O5 Bi1 O8 2_645 . . 154.17(16) ?
  O6 Bi1 O6 . . 2_655 84.03(17) ?
  O6 Bi1 O8 . . . 76.05(17) ?
  O6 Bi1 O8 2_655 . . 74.40(14) ?
  O2 Bi2 O5 2_645 . . 163.85(18) ?
  O2 Bi2 O6 2_645 . . 71.59(16) ?
  O2 Bi2 O7 2_645 . 2_655 118.47(15) ?
  O2 Bi2 O8 2_645 . . 76.12(17) ?
  O2 Bi2 O9 2_645 . . 77.86(16) ?
  O5 Bi2 O6 . . . 101.31(17) ?
  O5 Bi2 O7 . . 2_655 77.30(15) ?
  O5 Bi2 O8 . . . 88.23(18) ?
  O5 Bi2 O9 . . . 104.35(17) ?
  O6 Bi2 O7 . . 2_655 130.87(17) ?
  O6 Bi2 O8 . . . 77.02(18) ?
  O6 Bi2 O9 . . . 146.37(18) ?
  O7 Bi2 O8 2_655 . . 150.32(15) ?
  O7 Bi2 O9 2_655 . . 76.46(16) ?
  O8 Bi2 O9 . . . 82.39(18) ?
  O1 Ba1 O2 . . 4_554 52.20(14) ?
  O1 Ba1 O4 . . . 139.78(12) ?
  O1 Ba1 O5 . . 2_645 84.38(13) ?
  O1 Ba1 O7 . . . 140.37(13) ?
  O1 Ba1 O8 . . 3_655 99.04(13) ?
  O1 Ba1 O9 . . 4_454 81.29(13) ?
  O1 Ba1 O10 . . . 85.17(14) ?
  O2 Ba1 O4 4_554 . . 113.01(15) ?
  O2 Ba1 O5 4_554 . 2_645 114.93(14) ?
  O2 Ba1 O7 4_554 . . 110.91(15) ?
  O2 Ba1 O8 4_554 . 3_655 61.48(14) ?
  O2 Ba1 O9 4_554 . 4_454 104.29(15) ?
  O2 Ba1 O10 4_554 . . 137.35(14) ?
  O4 Ba1 O5 . . 2_645 129.53(14) ?
  O4 Ba1 O7 . . . 78.12(13) ?
  O4 Ba1 O8 . . 3_655 103.69(13) ?
  O4 Ba1 O9 . . 4_454 65.76(13) ?
  O4 Ba1 O10 . . . 100.24(15) ?
  O5 Ba1 O7 2_645 . . 71.08(13) ?
  O5 Ba1 O8 2_645 . 3_655 86.06(14) ?
  O5 Ba1 O9 2_645 . 4_454 115.05(15) ?
  O5 Ba1 O10 2_645 . . 50.54(14) ?
  O7 Ba1 O8 . . 3_655 50.03(15) ?
  O7 Ba1 O9 . . 4_454 137.05(14) ?
  O7 Ba1 O10 . . . 101.19(15) ?
  O8 Ba1 O9 3_655 . 4_454 158.71(14) ?
  O8 Ba1 O10 3_655 . . 136.00(13) ?
  O9 Ba1 O10 4_454 . . 65.28(14) ?
  O1 B1 O2 2_544 . 3_555 59.0(3) ?
  O1 B1 O4 2_544 . . 54.3(3) ?
  O1 B1 O5 2_544 . 4_454 107.9(4) ?
  O1 B1 O10 2_544 . 3_555 145.4(5) ?
  O2 B1 O4 3_555 . . 108.4(6) ?
  O2 B1 O5 3_555 . 4_454 108.9(6) ?
  O2 B1 O10 3_555 . 3_555 112.0(5) ?
  O4 B1 O5 . . 4_454 113.1(6) ?
  O4 B1 O10 . . 3_555 107.9(6) ?
  O5 B1 O10 4_454 . 3_555 106.5(6) ?
  O4 B2 O7 4_555 . 3_555 57.0(4) ?
  O4 B2 O9 4_555 . 2_655 76.2(4) ?
  O4 B2 O9 4_555 . 4_454 132.7(3) ?
  O4 B2 O10 4_555 . . 143.1(5) ?
  O7 B2 O9 3_555 . 2_655 122.7(6) ?
  O7 B2 O9 3_555 . 4_454 89.6(4) ?
  O7 B2 O10 3_555 . . 115.3(6) ?
  O9 B2 O9 2_655 . 4_454 101.6(5) ?
  O9 B2 O10 2_655 . . 122.0(6) ?
  O9 B2 O10 4_454 . . 78.6(4) ?
  O1 B3 O2 4_555 . . 108.3(5) ?
  O1 B3 O3 4_555 . 2_655 106.5(7) ?
  O1 B3 O4 4_555 . 3_555 56.1(3) ?
  O1 B3 O6 4_555 . . 110.8(6) ?
  O2 B3 O3 . . 2_655 112.3(6) ?
  O2 B3 O4 . . 3_555 55.2(3) ?
  O2 B3 O6 . . . 106.1(6) ?
  O3 B3 O4 2_655 . 3_555 140.0(6) ?
  O3 B3 O6 2_655 . . 112.7(6) ?
  O4 B3 O6 3_555 . . 107.3(5) ?
  O1 B4 O2 . . 4_554 60.9(3) ?
  O1 B4 O4 . . 2_554 112.1(5) ?
  O1 B4 O7 . . 1_565 108.1(6) ?
  O1 B4 O8 . . 3_665 110.5(5) ?
  O2 B4 O4 4_554 . 2_554 55.0(3) ?
  O2 B4 O7 4_554 . 1_565 143.0(4) ?
  O2 B4 O8 4_554 . 3_665 111.4(5) ?
  O4 B4 O7 2_554 . 1_565 109.2(5) ?
  O4 B4 O8 2_554 . 3_665 111.2(6) ?
  O7 B4 O8 1_565 . 3_665 105.5(5) ?

loop_
 _geom_torsion_atom_site_label_1
 _geom_torsion_atom_site_label_2
 _geom_torsion_atom_site_label_3
 _geom_torsion_atom_site_label_4
 _geom_torsion_site_symmetry_1
 _geom_torsion_site_symmetry_2
 _geom_torsion_site_symmetry_3
 _geom_torsion_site_symmetry_4
 _geom_torsion
 _geom_torsion_publ_flag
 ? ? ? ? ? ? ? ? ? ?

loop_
 _geom_hbond_atom_site_label_D
 _geom_hbond_atom_site_label_H
 _geom_hbond_atom_site_label_A
 _geom_hbond_site_symmetry_D
 _geom_hbond_site_symmetry_H
 _geom_hbond_site_symmetry_A
 _geom_hbond_distance_DH
 _geom_hbond_distance_HA
 _geom_hbond_distance_DA
 _geom_hbond_angle_DHA
 _geom_hbond_publ_flag
 ? ? ? ? ? ? ? ? ? ? ?


#=======================================================================

# 11. STRUCTURE-FACTOR LIST

loop_
 _refln_index_h
 _refln_index_k
 _refln_index_l
 _refln_F_squared_calc
 _refln_F_squared_meas
 _refln_F_squared_sigma
 _refln_observed_status
   2   0   0   1887.89   2003.35     55.84 o
   3   0   0  79018.80  86849.00   1197.12 o
   4   0   0  87466.00  95155.60   1486.81 o
   5   0   0 253934.00 266595.00   4034.62 o
   6   0   0     82.44    143.10     76.78 <
   7   0   0  23430.20  23544.60    502.58 o
   8   0   0 100385.00  99727.70   1661.31 o
   9   0   0  31637.90  30095.60   1273.91 o
  10   0   0    393.56    359.49    279.21 <
  11   0   0    375.55    101.21    321.09 <
  12   0   0   3665.53   3294.71    481.64 o
  13   0   0  24848.40  26193.60   1336.73 o
  14   0   0   2381.96   2443.11    554.93 o
   1   1   0   9363.44   9751.49    146.59 o
   2   1   0   5698.20   6090.32    125.65 o
   3   1   0 132189.00 137920.00   2108.05 o
   4   1   0  37845.30  39592.30    684.07 o
   5   1   0   9508.78   8910.36    233.84 o
   6   1   0   6207.55   6341.61    209.41 o
   7   1   0  30176.00  31209.00    610.78 o
   8   1   0  53815.90  54355.70    973.75 o
   9   1   0   7724.50   8222.80    418.82 o
  10   1   0   1896.53   1710.18    261.76 o
  11   1   0  23821.80  23844.70    848.11 o
  12   1   0  37978.10  35498.40   1553.12 o
  13   1   0   5064.61   5291.07    614.27 o
  14   1   0    702.50   1218.06    495.60 <
   0   2   0  19394.90  21080.50    523.52 o
   1   2   0  36385.50  39480.60    516.54 o
   2   2   0   4672.94   5381.82    108.19 o
   3   2   0   1744.63   1821.86     62.82 o
   4   2   0  36764.70  38231.20    492.11 o
   5   2   0  11052.90  11646.60    198.94 o
   6   2   0    391.58    338.55     66.31 o
   7   2   0   3315.49   3200.47    132.63 o
   8   2   0   1137.68   1371.63    132.63 o
   9   2   0   9636.83  10037.70    376.94 o
  10   2   0   1940.24   2083.62    219.88 o
  11   2   0   2508.82   2656.01    258.27 o
  12   2   0    983.47    841.13    240.82 o
  13   2   0    235.39     62.82    244.31 <
   1   3   0    271.79    457.21     55.84 o
   2   3   0  19666.50  19852.00    289.68 o
   3   3   0  23696.40  23959.90    349.02 o
   4   3   0   3304.83   3444.78    115.18 o
   5   3   0  35139.80  35770.60    572.39 o
   6   3   0   7280.10   6914.00    181.49 o
   7   3   0    216.58    272.23     83.76 o
   8   3   0    569.67    680.58    111.68 o
   9   3   0   1132.85   1099.40    202.43 o
  10   3   0  22048.60  21652.90    743.40 o
  11   3   0   2675.28   2240.68    303.64 o
  12   3   0   1627.23   1846.29    268.74 o
  13   3   0   3009.52   3151.61    328.07 o
   0   4   0 124052.00 125551.00   2827.03 o
   1   4   0   1017.82   1263.44    153.57 o
   2   4   0   4087.71   4411.56    157.06 o
   3   4   0  10226.80  10044.70    195.45 o
   4   4   0  15280.60  15245.00    258.27 o
   5   4   0  25639.30  25404.80    397.88 o
   6   4   0   1955.03   1807.90    118.67 o
   7   4   0  11470.40  11377.90    279.21 o
   8   4   0  28494.90  28172.50    586.35 o
   9   4   0   4793.23   4973.47    324.58 o
  10   4   0    977.53   1420.49    251.29 o
  11   4   0   1497.52    928.38    261.76 o
  12   4   0    837.86   1040.07    247.80 o
  13   4   0  12007.50  11943.30    614.27 o
   1   5   0  30514.10  32098.90    778.30 o
   2   5   0     14.64    300.15    181.49 <
   3   5   0  37505.40  37683.20    673.60 o
   4   5   0  21991.40  20749.00    582.86 o
   5   5   0   1291.16   1085.44    108.19 o
   6   5   0   2906.04   2460.56    118.67 o
   7   5   0  30106.30  29732.60    481.64 o
   8   5   0  33218.30  32472.40    670.11 o
   9   5   0    416.40    383.92    171.02 <
  10   5   0    387.69    467.68    195.45 <
  11   5   0   7078.32   6456.79    422.31 o
  12   5   0  23051.90  22588.30   1235.51 o
   0   6   0  22727.10  23495.70    750.38 o
   1   6   0  46731.90  48576.00   1120.34 o
   2   6   0   1033.21    942.34    237.33 o
   3   6   0   1814.01   1940.53    265.25 o
   4   6   0  69516.00  68550.10   1354.18 o
   5   6   0  11953.60  12114.30    404.86 o
   6   6   0    408.70    488.62    171.02 <
   7   6   0   2090.97   2052.21    244.31 o
   8   6   0   3211.17   2736.28    397.88 o
   9   6   0  22219.40  24881.30   1165.71 o
  10   6   0    227.34    446.74    383.92 <
  11   6   0   6613.65   7364.23    694.54 o
   1   7   0   2998.33   3053.89    303.64 o
   2   7   0  12578.60  13932.70    603.80 o
   3   7   0    253.47    450.23    251.29 <
   4   7   0   2164.74   1633.39    289.68 o
   5   7   0  11103.10  11583.80    596.82 o
   6   7   0    488.22    485.13    258.27 <
   7   7   0  13216.20  12257.40    687.56 o
   8   7   0   7367.00   7318.85    575.88 o
   9   7   0    616.83    509.56    352.51 <
  10   7   0  13196.30  13433.60    869.05 o
   0   8   0     64.20    834.15    596.82 <
   1   8   0   6309.77   6983.80    631.72 o
   2   8   0  17590.80  19077.20    760.85 o
   3   8   0   4815.04   4247.52    335.05 o
   4   8   0    419.54    230.35    310.62 <
   5   8   0    580.73    272.23    324.58 <
   6   8   0   8709.97   7901.71    554.93 o
   7   8   0   9872.96   9835.25    635.21 o
   8   8   0     68.30    -52.35    324.58 <
   9   8   0     40.32    -27.92    352.51 <
   1   9   0  13408.10  14997.20    931.87 o
 -14   1   1   2004.04   1989.39    397.88 o
 -13   1   1   6491.36   6051.93    488.62 o
 -12   1   1  16867.10  18365.20    757.36 o
 -11   1   1   3629.10   4320.81    366.47 o
 -10   1   1     77.03    191.96    171.02 <
  -9   1   1   1069.63   1204.10    174.51 o
  -8   1   1   3820.53   3985.76    164.04 o
  -7   1   1   9319.36   9130.24    261.76 o
  -6   1   1  35762.40  36126.60    666.62 o
  -5   1   1   4632.66   4373.16    153.57 o
  -4   1   1  41561.40  43319.80    732.93 o
  -3   1   1  30897.40  33379.80    659.64 o
  -2   1   1  10880.00  11290.60    282.70 o
  -1   1   1  27447.40  27652.50    642.19 o
   0   1   1   4392.33   4394.10     87.25 o
   1   1   1  12449.60  13220.70    286.19 o
   2   1   1  64703.30  66016.30   1186.65 o
   3   1   1  67061.20  68899.10   1102.89 o
   4   1   1    345.51    310.62     62.82 o
   5   1   1   2249.53   1944.02    111.68 o
   6   1   1    635.88    910.93    115.18 o
   7   1   1  28311.50  29561.60    830.66 o
   8   1   1  29168.40  29282.40    698.03 o
   9   1   1   9510.69   9472.28    631.72 o
  10   1   1   2331.38   1497.28    352.51 o
  11   1   1  14573.90  12997.30    837.64 o
  12   1   1   2105.02   1849.78    471.17 o
  13   1   1   2212.49   3319.14    540.97 o
 -14   2   1  25992.10  26242.50    963.28 o
 -13   2   1   5080.81   5022.33    356.00 o
 -12   2   1   4460.01   3839.17    314.11 o
 -11   2   1    659.31    663.13    191.96 o
 -10   2   1  13816.10  13517.40    457.21 o
  -9   2   1 150898.00 145313.00   2090.60 o
  -8   2   1    536.48    628.23     87.25 o
  -7   2   1     79.11    139.61     69.80 <
  -6   2   1  55835.20  55744.70    718.97 o
  -5   2   1  74517.30  74731.20    914.42 o
  -4   2   1 144177.00 145662.00   1804.41 o
  -3   2   1    425.40    478.15     34.90 o
  -2   2   1   9325.42   9870.16    237.33 o
  -1   2   1 314651.00 312268.00   4153.28 o
   0   2   1  51803.70  53308.60    844.62 o
   1   2   1   1512.13   1664.80     48.86 o
   3   2   1    847.85   1061.01     52.35 o
   4   2   1 120280.00 120400.00   1326.26 o
   5   2   1     67.90    247.80     52.35 o
   6   2   1  68126.70  68445.40    945.83 o
   7   2   1  12055.70  12292.30    268.74 o
   8   2   1   3655.78   3587.88    191.96 o
   9   2   1    678.69    656.15    205.92 o
  10   2   1   7353.22   6945.41    324.58 o
  11   2   1  30134.10  30451.60   1001.67 o
  12   2   1   5788.92   6250.87    460.70 o
  13   2   1   2336.26   1755.55    342.04 o
 -13   3   1  20095.30  19883.40    568.90 o
 -12   3   1  20678.50  20462.80    638.70 o
 -11   3   1   1108.89   1047.05    219.88 o
 -10   3   1   2996.95   3214.43    289.68 o
  -9   3   1   4800.71   4997.90    310.62 o
  -8   3   1  32961.30  32165.30    516.54 o
  -7   3   1     50.23    244.31     76.78 o
  -6   3   1  65577.90  65206.60    774.81 o
  -5   3   1   6452.94   6289.26    139.61 o
  -4   3   1  22458.70  22350.90    314.11 o
  -3   3   1   1129.35   1008.65     48.86 o
  -2   3   1  92402.70  95302.20   1127.32 o
  -1   3   1 108117.00 110526.00   1504.26 o
   0   3   1   1239.36   1169.20     69.80 o
   1   3   1   2206.73   2359.34     55.84 o
   2   3   1 103190.00 106628.00   1151.75 o
   3   3   1 153484.00 156767.00   1699.71 o
   4   3   1  15718.30  15618.40    300.15 o
   5   3   1    870.26    872.54     87.25 o
   6   3   1  14816.50  15601.00    303.64 o
   7   3   1  99123.90 102066.00   1371.63 o
   8   3   1  33666.50  34161.60    694.54 o
   9   3   1    708.22    725.95    167.53 o
  10   3   1   4769.55   4516.26    349.02 o
  11   3   1  35676.90  34140.70   1071.48 o
  12   3   1  18420.50  18166.30    739.91 o
  13   3   1    753.28    760.85    321.09 <
 -12   4   1     86.95    233.84    226.86 <
 -11   4   1   1990.84   1846.29    237.33 o
 -10   4   1  24717.20  24539.30    659.64 o
  -9   4   1  13858.40  14334.10    446.74 o
  -8   4   1  28143.80  27491.90    506.07 o
  -7   4   1   3187.61   3238.86    143.10 o
  -6   4   1  10948.90  10802.00    230.35 o
  -5   4   1  74338.30  71436.50    949.32 o
  -4   4   1  12053.30  12208.60    251.29 o
  -3   4   1   4933.85   5130.53    157.06 o
  -2   4   1  18661.40  18850.30    383.92 o
  -1   4   1  18680.80  18476.90    593.33 o
   0   4   1  52045.60  54453.40    935.36 o
   1   4   1   1388.56   1542.65     94.23 o
   2   4   1   4362.68   4223.09    108.19 o
   3   4   1  29769.10  30154.90    443.25 o
   4   4   1   6548.91   6812.78    174.51 o
   5   4   1     35.52    -27.92     73.29 <
   6   4   1   2169.77   2118.52    132.63 o
   7   4   1   5982.57   5640.09    202.43 o
   8   4   1   6046.27   6195.02    338.55 o
   9   4   1      3.83    125.65    188.47 <
  10   4   1  13780.40  14138.60    572.39 o
  11   4   1   1901.85   1923.07    300.15 o
  12   4   1   1155.18   1012.14    314.11 o
  13   4   1   1180.38    691.05    321.09 <
 -12   5   1    565.70    202.43    408.35 <
 -11   5   1   7714.93   6886.07    663.13 o
 -10   5   1    833.13    865.56    366.47 <
  -9   5   1    855.33    621.25    310.62 <
  -8   5   1    832.35    621.25    157.06 o
  -7   5   1  12526.80  12306.30    268.74 o
  -6   5   1   7637.03   7797.00    362.98 o
  -5   5   1   1670.83   1319.28    139.61 o
  -4   5   1  23174.20  23275.80    516.54 o
  -3   5   1   9789.88   9678.20    317.60 o
  -2   5   1  18617.40  19782.20    680.58 o
  -1   5   1   1460.71   1773.00    202.43 o
   0   5   1   1172.78   1441.43    136.12 o
   1   5   1  44793.10  48747.00   1232.02 o
   2   5   1    630.78    809.72    132.63 o
   3   5   1   6746.12   6418.39    153.57 o
   4   5   1  40264.70  38311.40    527.01 o
   5   5   1    399.74    425.80     73.29 o
   6   5   1  19338.70  19436.70    376.94 o
   7   5   1   3562.52   2970.12    191.96 o
   8   5   1     97.19    171.02    181.49 <
   9   5   1  33392.20  33858.00    984.22 o
  10   5   1    422.59    446.74    233.84 <
  11   5   1    150.96     73.29    254.78 <
  12   5   1   8383.69   7699.28    499.09 o
 -11   6   1   6675.45   6132.20    642.19 o
 -10   6   1    198.10     34.90    356.00 <
  -9   6   1   8485.55   8411.27    635.21 o
  -8   6   1   4690.81   4334.77    453.72 o
  -7   6   1  10215.80   8767.27    450.23 o
  -6   6   1     56.85    551.44    184.98 <
  -5   6   1    990.85    869.05    125.65 o
  -4   6   1   3010.70   2795.61     97.72 o
  -3   6   1  15617.10  16609.60    656.15 o
  -2   6   1  12129.20  12505.20    530.50 o
  -1   6   1  17552.40  17621.80    565.41 o
   0   6   1    169.33    230.35    139.61 <
   1   6   1  10260.80  11063.80    474.66 o
   2   6   1   9196.65  10166.80    471.17 o
   3   6   1     14.13    136.12    188.47 <
   4   6   1  14059.20  14072.30    324.58 o
   5   6   1    576.67    551.44    139.61 o
   6   6   1  18760.60  18686.30    593.33 o
   7   6   1   1096.75    834.15    286.19 <
   8   6   1   3890.66   3828.70    453.72 o
   9   6   1    734.39    872.54    369.96 <
  10   6   1   1441.48    834.15    411.84 <
  11   6   1   3907.00   3961.33    572.39 o
 -10   7   1   6682.20   6268.32    614.27 o
  -9   7   1   1801.87   1905.62    408.35 o
  -8   7   1  12636.30  12945.00    750.38 o
  -7   7   1    924.97   1256.46    310.62 o
  -6   7   1   6683.84   6599.88    478.15 o
  -5   7   1    885.75    956.30    247.80 o
  -4   7   1   4673.28   5189.86    380.43 o
  -3   7   1   4323.44   5120.06    411.84 o
  -2   7   1  25857.40  29345.20    827.17 o
  -1   7   1   9676.03  10187.80    453.72 o
   0   7   1   5677.18   5256.17    502.58 o
   1   7   1    395.33    212.90    226.86 <
   2   7   1   3837.07   4170.73    352.51 o
   3   7   1  18759.00  19049.30    743.40 o
   4   7   1    357.51    467.68    275.72 <
   5   7   1  12699.50  12466.80    610.78 o
   6   7   1   3997.02   3877.56    404.86 o
   7   7   1  19083.10  18836.40    896.97 o
   8   7   1     86.74    -52.35    300.15 <
   9   7   1   1306.14   1005.16    390.90 <
  10   7   1    707.37    272.23    404.86 <
  -9   8   1   4322.29   4746.61    537.48 o
  -8   8   1   6429.98   5765.73    527.01 o
  -7   8   1    562.25    450.23    376.94 <
  -6   8   1   1129.46   1378.61    373.45 o
  -5   8   1  42345.90  44576.20   1371.63 o
  -4   8   1   2104.71   2202.29    296.66 o
  -3   8   1    295.11    171.02    216.39 <
  -2   8   1   3440.69   3727.48    366.47 o
  -1   8   1   3182.18   3224.90    513.05 o
   0   8   1  27012.70  30650.50   1235.51 o
   1   8   1    134.77     59.33    540.97 <
   2   8   1  11429.90  15129.80   1176.18 o
   3   8   1  16903.10  18211.60    767.83 o
   4   8   1   3064.72   2970.12    404.86 o
   5   8   1     78.68   -157.06    324.58 <
   6   8   1   1227.90    621.25    362.98 <
   7   8   1   5419.54   5416.72    527.01 o
   8   8   1   9215.77   8941.78    645.68 o
   9   8   1     15.76   -115.18    345.52 <
  -1   9   1   4708.25   5064.21    645.68 o
   0   9   1     73.96   -328.07    502.58 <
   1   9   1   8785.54   8976.68   1043.56 o
 -14   0   2  25351.80  23806.30    876.03 o
 -13   0   2  28905.60  28434.30   1350.69 o
 -12   0   2   3006.26   2704.87    432.78 o
 -11   0   2   1726.60   1427.47    226.86 o
 -10   0   2 163714.00 166390.00   3113.22 o
  -9   0   2  20690.90  20815.30    579.37 o
  -8   0   2     53.36     80.27    101.21 <
  -7   0   2   4017.84   3933.40    171.02 o
  -6   0   2  12079.30  12903.10    307.13 o
  -5   0   2 228804.00 246213.00   4296.38 o
  -4   0   2   3459.89   4264.97    153.57 o
  -3   0   2  88389.00  92220.40   1647.35 o
  -2   0   2  41151.80  41944.70    949.32 o
  -1   0   2  27836.70  27767.70    624.74 o
   0   0   2   3325.13   3032.94    129.14 o
   1   0   2  23500.40  23017.60    575.88 o
   2   0   2  93379.20  96181.70   2149.94 o
   3   0   2  76650.40  78476.10   1790.45 o
   4   0   2   4390.14   4736.14    191.96 o
   5   0   2 174475.00 173181.00   3099.26 o
   6   0   2   7950.85   8428.72    296.66 o
   7   0   2   8982.25   9004.60    282.70 o
   8   0   2    179.70    492.11    146.59 o
   9   0   2   9605.44  10540.30    499.09 o
  10   0   2 120505.00 122229.00   2942.20 o
  11   0   2    532.18    300.15    261.76 <
  12   0   2    378.93     87.25    404.86 <
  13   0   2  20579.40  19639.10   1190.14 o
 -15   1   2   8725.69   8571.82    771.32 o
 -14   1   2     68.98    111.68    216.39 <
 -13   1   2   8845.31   8187.90    362.98 o
 -12   1   2   3134.00   3357.53    373.45 o
 -11   1   2   8991.37   8770.76    335.05 o
 -10   1   2  16331.80  14658.60    565.41 o
  -9   1   2    236.07    369.96    139.61 <
  -8   1   2    680.02    757.36    101.21 o
  -7   1   2  84547.10  87571.50   1430.96 o
  -6   1   2  69353.70  70598.80   1158.73 o
  -5   1   2   2172.61   2551.30    146.59 o
  -4   1   2  10080.00  10226.20    303.64 o
  -3   1   2  51680.30  54565.10    987.71 o
  -2   1   2 158116.00 162257.00   2411.70 o
  -1   1   2  50100.00  51186.60   1116.85 o
   0   1   2   4070.76   3626.27     97.72 o
   1   1   2  44060.30  42182.00    694.54 o
   2   1   2 150328.00 150007.00   2286.05 o
   3   1   2  37241.80  36018.40    624.74 o
   4   1   2   9511.13   9482.75    247.80 o
   5   1   2     54.12     80.27     76.78 <
   6   1   2  51399.20  52125.50   1061.01 o
   7   1   2  63008.20  64916.90   1130.81 o
   8   1   2   2617.34   2820.04    366.47 o
   9   1   2    429.52    251.29    279.21 <
  10   1   2   9145.70   9364.08    492.11 o
  11   1   2   6734.91   5905.34    429.29 o
  12   1   2   2044.67    991.20    314.11 o
  13   1   2   8838.67   9765.45    600.31 o
 -15   2   2   2540.44   2020.80    492.11 o
 -14   2   2   6762.35   6502.16    404.86 o
 -13   2   2   1778.00   1479.83    198.94 o
 -12   2   2   1010.45    994.69    195.45 o
 -11   2   2   3367.84   3546.00    209.41 o
 -10   2   2   5217.46   5507.46    226.86 o
  -9   2   2  11384.60  12184.10    314.11 o
  -8   2   2   1148.38   1225.04     97.72 o
  -7   2   2     17.60     90.74     66.31 <
  -6   2   2  15477.80  15391.60    258.27 o
  -5   2   2   2817.88   2743.26     90.74 o
  -4   2   2   2532.51   2816.55    111.68 o
  -3   2   2   2048.80   2170.88     83.76 o
  -2   2   2   5486.40   5842.52    136.12 o
  -1   2   2  15771.40  15667.30    244.31 o
   0   2   2     83.13    184.98     27.92 o
   1   2   2   6068.97   6118.24    129.14 o
   2   2   2   2777.73   3329.61    101.21 o
   3   2   2   7610.11   7971.51    160.55 o
   4   2   2     20.89     27.92     48.86 <
   5   2   2   2790.24   2893.34    101.21 o
   6   2   2  20401.50  21307.40    328.07 o
   7   2   2   2195.53   2306.99    111.68 o
   8   2   2   4156.66   4432.50    244.31 o
   9   2   2   5662.01   6079.85    296.66 o
  10   2   2   2730.82   2502.44    237.33 o
  11   2   2   6365.28   6533.57    369.96 o
  12   2   2   1981.07   1588.02    286.19 o
  13   2   2   1523.60   1277.40    286.19 o
 -13   3   2   7791.96   7922.65    411.84 o
 -12   3   2   3441.64   4083.48    307.13 o
 -11   3   2    755.84    666.62    164.04 o
 -10   3   2    641.46    691.05    171.02 o
  -9   3   2    550.86    666.62    129.14 o
  -8   3   2  18556.80  18096.40    314.11 o
  -7   3   2  17201.70  16909.80    272.23 o
  -6   3   2   1433.41   1270.42     73.29 o
  -5   3   2  37197.90  36426.70    481.64 o
  -4   3   2   1775.71   1720.65     66.31 o
  -3   3   2   7425.32   7988.96    198.94 o
  -2   3   2   5900.98   6079.85    157.06 o
  -1   3   2   5423.93   5971.65    160.55 o
   0   3   2 104409.00 106373.00   1615.94 o
   1   3   2   4044.59   3881.05     90.74 o
   2   3   2   2081.26   2209.27     69.80 o
   3   3   2   4383.18   4383.63    101.21 o
   4   3   2   1355.09   1148.26     76.78 o
   5   3   2  33442.70  33795.20    450.23 o
   6   3   2   1996.00   2111.54    108.19 o
   7   3   2  13304.90  13601.10    300.15 o
   8   3   2  13599.00  13580.20    429.29 o
   9   3   2    352.23    282.70    167.53 <
  10   3   2   1276.40   1169.20    261.76 o
  11   3   2    614.98    422.31    272.23 <
  12   3   2   2349.68   2083.62    359.49 o
  13   3   2   5021.15   4107.91    436.27 o
 -12   4   2   2704.64   2715.34    359.49 o
 -11   4   2    284.83    279.21    212.90 <
 -10   4   2  45370.00  43281.40   1162.22 o
  -9   4   2   1707.69   1284.38    188.47 o
  -8   4   2   3786.49   4073.01    164.04 o
  -7   4   2   1597.44   1713.67    104.71 o
  -6   4   2    742.81    715.48     76.78 o
  -5   4   2  47225.10  46241.10    586.35 o
  -4   4   2   2619.03   2572.24     97.72 o
  -3   4   2  45722.70  45689.60    621.25 o
  -2   4   2  28362.90  28203.90    359.49 o
  -1   4   2   8102.12   8386.84    181.49 o
   0   4   2    325.45    328.07     55.84 o
   1   4   2  10028.70   9625.84    146.59 o
   2   4   2  26068.20  25436.20    314.11 o
   3   4   2  42573.50  43969.00    568.90 o
   4   4   2   3688.54   4383.63    129.14 o
   5   4   2  49457.20  51699.70    893.48 o
   6   4   2   1823.29   1710.18    118.67 o
   7   4   2     99.34     52.35    115.18 <
   8   4   2   2787.07   2554.79    258.27 o
   9   4   2   1603.30   1448.41    258.27 o
  10   4   2  36285.40  36119.60   1088.93 o
  11   4   2     53.21    362.98    265.25 <
  12   4   2   4060.52   3046.90    383.92 o
  13   4   2   4110.16   4188.19    586.35 o
 -12   5   2      9.43    -80.27    418.82 <
 -11   5   2  20926.70  22337.00   1172.69 o
 -10   5   2   6113.74   7102.46    617.76 o
  -9   5   2   2880.91   2645.54    411.84 o
  -8   5   2     20.06      6.98    115.18 <
  -7   5   2  32589.70  30657.50    471.17 o
  -6   5   2  48274.90  48401.50    977.24 o
  -5   5   2    506.73    474.66     90.74 o
  -4   5   2   1087.09    910.93     87.25 o
  -3   5   2  31882.20  33495.00    554.93 o
  -2   5   2  88124.20  90178.60   2195.31 o
  -1   5   2   7482.77   6774.39    373.45 o
   0   5   2    553.85    551.44    111.68 o
   1   5   2   8093.92   8083.20    359.49 o
   2   5   2  72859.30  68567.60    896.97 o
   3   5   2  29825.70  29069.50    436.27 o
   4   5   2   2377.15   2094.09     97.72 o
   5   5   2     18.95      3.49     80.27 <
   6   5   2  36543.90  37634.30    621.25 o
   7   5   2  24883.70  26047.00    551.44 o
   8   5   2     55.92     10.47    195.45 <
   9   5   2   4705.29   4184.69    335.05 o
  10   5   2   3431.43   3109.73    317.60 o
  11   5   2  16195.30  15761.50    663.13 o
  12   5   2      2.15    188.47    296.66 <
 -11   6   2  10179.50  10767.10    806.23 o
 -10   6   2   8360.78   8212.33    666.62 o
  -9   6   2  22960.50  21632.00   1057.52 o
  -8   6   2     15.84    209.41    293.17 <
  -7   6   2    596.09    788.78    237.33 o
  -6   6   2  43239.70  40946.50   1092.42 o
  -5   6   2   4934.69   4753.59    212.90 o
  -4   6   2     34.53      0.00     66.31 <
  -3   6   2    753.45    945.83    212.90 o
  -2   6   2    534.92    540.97    191.96 <
  -1   6   2  26718.80  27687.40    757.36 o
   0   6   2    313.26    188.47    118.67 <
   1   6   2  41160.20  43204.60   1155.24 o
   2   6   2     96.08    191.96    181.49 <
   3   6   2    101.53    108.19    150.08 <
   4   6   2   1712.72   1399.55    115.18 o
   5   6   2   7926.64   7762.10    230.35 o
   6   6   2  44224.80  43403.60    778.30 o
   7   6   2     24.03      3.49    171.02 <
   8   6   2     74.90      3.49    195.45 <
   9   6   2  23814.70  23425.90    635.21 o
  10   6   2   9529.94   9063.93    523.52 o
  11   6   2   9192.79   8976.68    771.32 o
 -10   7   2    460.06    530.50    411.84 <
  -9   7   2    126.55    178.00    335.05 <
  -8   7   2  15747.20  15611.50    841.13 o
  -7   7   2   1180.07    938.85    310.62 o
  -6   7   2   7952.67   8372.88    544.46 o
  -5   7   2  19350.70  19632.10    865.56 o
  -4   7   2    256.37    195.45    212.90 <
  -3   7   2  31172.40  34604.90   1067.99 o
  -2   7   2  16839.40  18117.40    624.74 o
  -1   7   2   3042.24   3298.20    317.60 o
   0   7   2  30582.80  33711.40   1654.33 o
   1   7   2   3753.62   3971.80    342.04 o
   2   7   2  13576.10  15129.80    554.93 o
   3   7   2  29538.20  31809.30    865.56 o
   4   7   2    147.77    230.35    254.78 <
   5   7   2  15920.80  16005.80    691.05 o
   6   7   2   5793.41   5507.46    439.76 o
   7   7   2    232.77    146.59    293.17 <
   8   7   2  11433.60  12142.20    670.11 o
   9   7   2     15.02    -62.82    352.51 <
  -9   8   2    891.47   1294.85    397.88 o
  -8   8   2   6402.94   5674.99    533.99 o
  -7   8   2   5733.93   4942.06    467.68 o
  -6   8   2      3.42   -226.86    342.04 <
  -5   8   2    463.98    638.70    293.17 <
  -4   8   2   3503.19   3629.76    366.47 o
  -3   8   2   7589.58   8400.80    520.03 o
  -2   8   2    124.24      0.00    279.21 <
  -1   8   2   3263.77   3539.02    523.52 o
   0   8   2     46.83     59.33    533.99 <
   1   8   2   3168.46   3050.39    680.58 o
   2   8   2    143.47     -6.98    401.37 <
   3   8   2  10425.70  11943.30    750.38 o
   4   8   2   2911.63   2767.69    380.43 o
   5   8   2     72.36    178.00    335.05 <
   6   8   2    279.21    767.83    362.98 <
   7   8   2   4990.44   4038.11    471.17 o
   8   8   2   6470.59   5846.01    537.48 o
   0   9   2   4783.28   4785.00    872.54 o
   1   9   2   4699.13   5182.88    869.05 o
 -15   1   3   1779.94   1776.49    485.13 o
 -14   1   3   2041.44   1937.04    328.07 o
 -13   1   3   3253.30   3350.55    247.80 o
 -12   1   3   1523.38   1563.59    195.45 o
 -11   1   3  18460.60  17098.30    380.43 o
 -10   1   3   6006.99   6153.14    233.84 o
  -9   1   3  17231.80  16658.50    373.45 o
  -8   1   3  29149.00  29669.80    446.74 o
  -7   1   3  28433.50  28737.90    457.21 o
  -6   1   3   1729.23   1853.27    111.68 o
  -5   1   3   4990.92   4830.37    171.02 o
  -4   1   3  12248.30  13684.90    317.60 o
  -3   1   3  41354.90  42768.40    614.27 o
  -2   1   3  80854.20  82894.70   1270.42 o
  -1   1   3  26823.60  27362.80    411.84 o
   0   1   3    501.85    380.43     48.86 o
   1   1   3  16511.60  15021.60    303.64 o
   2   1   3   1216.88   1071.48     80.27 o
   3   1   3  28332.80  27715.30    464.19 o
   4   1   3  30125.00  29718.70    558.42 o
   5   1   3    214.07    254.78     87.25 <
   6   1   3  31019.60  31624.30    739.91 o
   7   1   3  10351.20  10201.70    279.21 o
   8   1   3   3357.00   3158.59    279.21 o
   9   1   3   1093.15   1535.67    247.80 o
  10   1   3    501.66    432.78    233.84 <
  11   1   3   2949.84   3015.49    362.98 o
  12   1   3  11985.30  12229.50    642.19 o
  13   1   3   7147.93   6599.88    527.01 o
 -15   2   3   5282.45   5322.49    621.25 o
 -14   2   3  30329.90  31243.90   1071.48 o
 -13   2   3   2250.06   2128.99    282.70 o
 -12   2   3   7681.32   7427.05    289.68 o
 -11   2   3  30897.50  31338.10    617.76 o
 -10   2   3   6248.17   6495.18    237.33 o
  -9   2   3    827.41    935.36    115.18 o
  -8   2   3   4228.28   4261.48    146.59 o
  -7   2   3  17513.20  17716.00    310.62 o
  -6   2   3  60386.10  59702.60    987.71 o
  -5   2   3    425.49    432.78     69.80 o
  -4   2   3 130905.00 133017.00   2327.93 o
  -3   2   3    421.23    715.48     59.33 o
  -2   2   3   1332.30   1319.28     69.80 o
  -1   2   3   1996.65   1926.57     73.29 o
   0   2   3  33277.00  32161.80    411.84 o
   1   2   3 250699.00 235976.00   2687.42 o
   2   2   3  12978.70  13604.60    254.78 o
   3   2   3   4007.41   3912.46    139.61 o
   4   2   3 104323.00 105389.00   1204.10 o
   5   2   3  54030.20  54962.90    684.07 o
   6   2   3  34425.50  33861.50    471.17 o
   7   2   3     62.89     94.23     90.74 <
   8   2   3     92.29    136.12    146.59 <
   9   2   3 103592.00 106394.00   1804.41 o
  10   2   3   8604.45   8407.78    331.57 o
  11   2   3    647.78    324.58    240.82 <
  12   2   3   1977.53   1546.14    296.66 o
  13   2   3   2352.41   1975.43    314.11 o
 -13   3   3    739.74    862.07    240.82 o
 -12   3   3  24824.90  23471.30    586.35 o
 -11   3   3  46819.20  46782.00    823.68 o
 -10   3   3   6268.38   6418.39    261.76 o
  -9   3   3    136.43    369.96    132.63 <
  -8   3   3  33644.90  33509.00    565.41 o
  -7   3   3  97886.00  96715.70   1273.91 o
  -6   3   3  29975.80  29324.30    446.74 o
  -5   3   3     34.36    122.15     62.82 <
  -4   3   3   9858.55  10247.10    212.90 o
  -3   3   3 139815.00 139774.00   2160.41 o
  -2   3   3  60984.40  60002.70    984.22 o
  -1   3   3    877.11    848.11     52.35 o
   0   3   3     61.74     90.74     48.86 <
   1   3   3  51055.70  49689.30    593.33 o
   2   3   3  73857.50  71764.50    889.99 o
   3   3   3     93.64    153.57     59.33 <
   4   3   3  17966.80  18267.50    300.15 o
   5   3   3   4537.14   4690.77    136.12 o
   6   3   3  29856.90  30301.50    436.27 o
   7   3   3    148.33    345.52     90.74 o
   8   3   3  22573.30  24127.40    635.21 o
   9   3   3   7265.59   8163.47    356.00 o
  10   3   3   1533.90   1881.19    244.31 o
  11   3   3    134.90     66.31    226.86 <
  12   3   3  20133.60  20553.50    684.07 o
 -13   4   3    685.85   1123.83    474.66 <
 -12   4   3     95.74    258.27    383.92 <
 -11   4   3    610.59    425.80    209.41 <
 -10   4   3  11508.50  10268.00    436.27 o
  -9   4   3    483.73    380.43    129.14 <
  -8   4   3  11030.50  10945.10    244.31 o
  -7   4   3   2596.34   2547.81    115.18 o
  -6   4   3     81.28    101.21     62.82 <
  -5   4   3   1747.93   1811.39     94.23 o
  -4   4   3  11429.50  11660.60    244.31 o
  -3   4   3  45795.80  46366.70    788.78 o
  -2   4   3    591.61    656.15     59.33 o
  -1   4   3   7542.75   7402.62    178.00 o
   0   4   3  59857.30  58819.60    949.32 o
   1   4   3  15749.30  15342.70    258.27 o
   2   4   3  27548.50  27282.50    342.04 o
   3   4   3   6166.76   6181.06    136.12 o
   4   4   3  16926.60  16941.20    275.72 o
   5   4   3  71093.90  71227.10    900.46 o
   6   4   3  10213.00  10421.60    240.82 o
   7   4   3   3576.76   3580.90    160.55 o
   8   4   3  22919.00  23087.40    614.27 o
   9   4   3  13081.80  13932.70    593.33 o
  10   4   3  18822.80  20434.90    767.83 o
  11   4   3   1114.54    830.66    300.15 <
  12   4   3     61.37   -125.65    307.13 <
 -12   5   3   7613.43   7674.85    725.95 o
 -11   5   3   1544.96   1905.62    481.64 o
 -10   5   3   1231.27   1347.20    394.39 o
  -9   5   3  28511.20  27628.10    848.11 o
  -8   5   3    107.39    178.00    101.21 <
  -7   5   3   4891.08   5228.25    188.47 o
  -6   5   3  24126.40  25638.70    450.23 o
  -5   5   3   1755.81   1591.51    101.21 o
  -4   5   3  31085.70  32249.00    502.58 o
  -3   5   3   2497.46   2656.01     76.78 o
  -2   5   3     98.69    233.84     55.84 o
  -1   5   3  50473.80  50582.80   1088.93 o
   0   5   3    317.52    279.21     59.33 o
   1   5   3     80.48    167.53     73.29 <
   2   5   3   9118.18   9098.83    188.47 o
   3   5   3   3579.63   3413.37    111.68 o
   4   5   3  21202.10  20117.20    352.51 o
   5   5   3     10.48     52.35     87.25 <
   6   5   3   8879.64   8543.90    233.84 o
   7   5   3   6580.21   6512.63    254.78 o
   8   5   3   1074.38   1061.01    240.82 o
   9   5   3    395.32    335.05    233.84 <
  10   5   3     28.99   -111.68    258.27 <
  11   5   3   7816.08   7098.97    471.17 o
  12   5   3    438.01    663.13    324.58 <
 -11   6   3   4881.32   5650.56    624.74 o
 -10   6   3   2821.50   2491.97    450.23 o
  -9   6   3   1003.77   1095.91    380.43 <
  -8   6   3   5562.02   4603.51    460.70 o
  -7   6   3   1478.28   1588.02    237.33 o
  -6   6   3  20861.10  22483.60    691.05 o
  -5   6   3   1083.87    942.34    125.65 o
  -4   6   3  13436.70  13684.90    247.80 o
  -3   6   3     12.39     76.78    101.21 <
  -2   6   3   7955.76   7845.87    467.68 o
  -1   6   3  12712.40  13688.40    537.48 o
   0   6   3     83.04    118.67     62.82 <
   1   6   3  18129.20  17859.10    558.42 o
   2   6   3  12545.90  12746.00    376.94 o
   3   6   3  13467.10  12212.00    244.31 o
   4   6   3   1208.46   1507.75    146.59 o
   5   6   3    800.07    851.60    150.08 o
   6   6   3     22.38    104.71    143.10 <
   7   6   3   9111.87   8613.70    390.90 o
   8   6   3   2880.77   2715.34    286.19 o
   9   6   3   6787.69   6118.24    603.80 o
  10   6   3     36.56    495.60    439.76 <
  11   6   3   3637.83   3455.25    600.31 o
 -10   7   3    584.95    492.11    376.94 <
  -9   7   3    977.74   1001.67    366.47 <
  -8   7   3    450.67   1218.06    356.00 o
  -7   7   3  22056.60  23282.80   1043.56 o
  -6   7   3   1800.39   1807.90    324.58 o
  -5   7   3  13337.50  13126.50    684.07 o
  -4   7   3    592.38    722.46    247.80 <
  -3   7   3  20361.00  22923.30    813.21 o
  -2   7   3   5173.51   4865.27    362.98 o
  -1   7   3   2739.43   2495.46    303.64 o
   0   7   3   5464.05   5486.52    523.52 o
   1   7   3  10693.10  10393.70    453.72 o
   2   7   3  23685.80  22302.10    820.19 o
   3   7   3   3620.33   3378.47    310.62 o
   4   7   3   7676.23   7427.05    485.13 o
   5   7   3    373.28    492.11    286.19 <
   6   7   3   9529.83   9482.75    551.44 o
   7   7   3   1885.00   1891.66    362.98 o
   8   7   3  13293.10  13046.20    670.11 o
   9   7   3   2265.21   2275.58    397.88 o
  -9   8   3    539.45    781.79    373.45 <
  -8   8   3  12849.50  12519.20    760.85 o
  -7   8   3   3721.92   3643.72    436.27 o
  -6   8   3    630.69    551.44    286.19 <
  -5   8   3     14.13    104.71    265.25 <
  -4   8   3   5869.57   6128.71    488.62 o
  -3   8   3  18979.70  22337.00    848.11 o
  -2   8   3   8411.01   8058.77    516.54 o
  -1   8   3      8.11   -279.21    533.99 <
   0   8   3  25086.70  28608.80   1186.65 o
   1   8   3   5000.25   5434.17    589.84 o
   2   8   3   5040.63   4907.16    561.91 o
   3   8   3    350.49    705.01    415.33 <
   4   8   3   1511.15   1315.79    642.19 <
   5   8   3  37972.50  37602.90   1232.02 o
   6   8   3   1543.44   1172.69    345.52 o
   7   8   3    499.97    205.92    673.60 <
 -14   0   4    856.05    729.44    310.62 <
 -13   0   4  34949.00  35159.80   1095.91 o
 -12   0   4    766.46    855.09    254.78 o
 -11   0   4    165.01     83.76    198.94 <
 -10   0   4    780.42    952.81    209.41 o
  -9   0   4  26940.60  28067.80    725.95 o
  -8   0   4 108363.00 111528.00   2132.48 o
  -7   0   4  14272.10  14941.40    432.78 o
  -6   0   4     31.96    150.08     94.23 <
  -5   0   4 183453.00 191470.00   3395.92 o
  -4   0   4  60730.40  64564.40   1225.04 o
  -3   0   4  52668.70  51940.50   1179.67 o
  -2   0   4    173.26    216.39     55.84 o
  -1   0   4  18534.00  18518.80    387.41 o
   0   0   4 583599.00 550687.00   9423.42 o
   1   0   4  13511.50  12965.90    408.35 o
   2   0   4    152.48     62.82     97.72 <
   3   0   4  46353.60  45769.90    938.85 o
   4   0   4  55887.60  56310.10   1137.79 o
   5   0   4  99815.00  97092.60   1619.43 o
   6   0   4     21.58    181.49    108.19 <
   7   0   4   9206.60   8987.15    307.13 o
   8   0   4  55684.90  52547.80   1423.98 o
   9   0   4  14004.40  14058.30    607.29 o
  10   0   4    823.29    848.11    261.76 o
  11   0   4   1931.80   2547.81    362.98 o
  12   0   4   2351.69   2355.85    582.86 o
  13   0   4  13061.90  14770.30   1113.36 o
 -15   1   4   2048.61   1954.49    481.64 o
 -14   1   4   1508.58   1214.57    230.35 o
 -13   1   4   4720.65   4729.16    268.74 o
 -12   1   4  33909.60  33194.90    666.62 o
 -11   1   4  22046.20  22452.20    499.09 o
 -10   1   4   3642.70   3584.39    216.39 o
  -9   1   4   7249.02   7353.75    272.23 o
  -8   1   4  36396.40  37885.60    586.35 o
  -7   1   4  17820.80  18340.80    376.94 o
  -6   1   4   3167.44   3448.27    136.12 o
  -5   1   4  17048.90  17768.40    338.55 o
  -4   1   4  41107.10  43417.50    659.64 o
  -3   1   4  73006.20  70745.40   1113.36 o
  -2   1   4  24925.50  25966.70    453.72 o
  -1   1   4  10824.90   9852.71    195.45 o
   0   1   4   1080.17    910.93     80.27 o
   1   1   4  11675.80  11287.20    258.27 o
   2   1   4      8.52    115.18     52.35 <
   3   1   4 107470.00 107273.00   2478.01 o
   4   1   4  28215.60  27038.20    607.29 o
   5   1   4   4453.90   4163.75    167.53 o
   6   1   4   5229.53   5517.93    202.43 o
   7   1   4  30544.80  31222.90    530.50 o
   8   1   4  51364.30  50020.90   1071.48 o
   9   1   4   8242.64   7716.73    328.07 o
  10   1   4   1402.55   1493.79    205.92 o
  11   1   4  18473.30  20759.40    823.68 o
  12   1   4  31623.60  31456.80   1102.89 o
  13   1   4   3347.76   2631.58    554.93 o
 -15   2   4     63.22    -38.39    404.86 <
 -14   2   4      8.32    118.67    261.76 <
 -13   2   4   1053.85    509.56    202.43 <
 -12   2   4   3687.21   3462.23    223.37 o
 -10   2   4   1215.51    959.79    143.10 o
  -9   2   4   7093.50   7071.05    233.84 o
  -8   2   4   6073.68   5982.12    160.55 o
  -7   2   4   6399.06   6833.72    202.43 o
  -6   2   4   2831.37   2928.24    125.65 o
  -5   2   4   6298.91   6809.29    184.98 o
  -4   2   4  21381.40  21981.00    457.21 o
  -3   2   4  21293.60  21981.00    450.23 o
  -2   2   4   9128.87   9549.06    195.45 o
  -1   2   4  27217.80  27181.30    436.27 o
   0   2   4  12153.20  11496.60    181.49 o
   1   2   4  19415.00  18675.80    310.62 o
   2   2   4   9879.00   9803.84    198.94 o
   3   2   4   4525.46   4285.91    146.59 o
   4   2   4  23039.30  23181.60    443.25 o
   5   2   4   5354.01   5601.70    153.57 o
   7   2   4   2671.81   2355.85    160.55 o
   8   2   4   1987.97   1944.02    205.92 o
   9   2   4   5300.59   5291.07    258.27 o
  10   2   4     84.36    164.04    171.02 <
  11   2   4    906.67   1074.97    258.27 o
  12   2   4    475.40    516.54    286.19 <
 -13   3   4   4606.94   4121.87    279.21 o
 -12   3   4   2091.39   2387.27    209.41 o
 -11   3   4   3144.71   4366.18    247.80 o
 -10   3   4  23773.20  23478.30    540.97 o
  -9   3   4     39.86     27.92    122.15 <
  -8   3   4    314.02    373.45     97.72 o
  -7   3   4     26.87    136.12     73.29 <
  -6   3   4   3986.14   4264.97    167.53 o
  -5   3   4  39512.80  39801.70    628.23 o
  -4   3   4    349.88    593.33     66.31 o
  -3   3   4  25411.40  25701.50    429.29 o
  -2   3   4  18834.30  18599.00    296.66 o
  -1   3   4    178.07    219.88     52.35 o
   0   3   4      1.05     31.41     52.35 <
   1   3   4   1007.02    977.24     73.29 o
   2   3   4  17158.30  16613.10    282.70 o
   3   3   4  16261.90  15761.50    279.21 o
   4   3   4   3723.22   3647.21    122.15 o
   5   3   4  19873.60  19921.80    321.09 o
   6   3   4   6017.20   5849.50    178.00 o
   7   3   4   1098.80   1099.40    132.63 o
   8   3   4   1127.56   1148.26    188.47 o
   9   3   4   1551.37   1905.62    219.88 o
  10   3   4  15806.60  16710.90    582.86 o
  11   3   4   1871.83   2216.25    286.19 o
  12   3   4   1295.21    984.22    289.68 o
 -13   4   4  13668.30  12623.90    966.77 o
 -12   4   4    763.12    429.29    272.23 <
 -11   4   4   1101.93   1081.95    167.53 o
 -10   4   4   1746.06   1909.11    174.51 o
  -9   4   4   8922.07   8749.82    279.21 o
  -8   4   4  34571.20  34221.00    527.01 o
  -7   4   4  17484.70  17346.10    307.13 o
  -6   4   4   3143.70   3266.78    111.68 o
  -5   4   4  30827.60  30856.50    589.84 o
  -4   4   4  13254.60  13147.40    307.13 o
  -3   4   4   7244.61   6997.76    178.00 o
  -2   4   4   9768.29   9929.49    223.37 o
  -1   4   4    286.35    321.09     55.84 o
   0   4   4 135376.00 129596.00   1828.84 o
   1   4   4    863.74    959.79     76.78 o
   2   4   4   7794.80   8058.77    181.49 o
   3   4   4   5658.69   5563.31    136.12 o
   4   4   4   7462.49   7465.44    167.53 o
   5   4   4  33539.50  34503.70    471.17 o
   6   4   4   1514.01   1622.92    111.68 o
   7   4   4  17489.80  17775.40    513.05 o
   8   4   4  19740.10  20110.30    725.95 o
   9   4   4   3528.19   3741.45    356.00 o
  10   4   4    293.09     41.88    279.21 <
  11   4   4   1686.52    718.97    328.07 <
  12   4   4   2665.01   2153.43    401.37 o
 -12   5   4  27555.40  27216.20    980.73 o
 -11   5   4   6948.26   6624.31    649.17 o
 -10   5   4    719.31    673.60    237.33 <
  -9   5   4    110.07    767.83    226.86 o
  -8   5   4  28917.50  28392.40    516.54 o
  -7   5   4  32113.70  33358.90    565.41 o
  -6   5   4   3746.98   3710.03    143.10 o
  -5   5   4   3700.93   3703.05    129.14 o
  -4   5   4  13881.20  14445.70    268.74 o
  -3   5   4  36843.50  37756.50    624.74 o
  -2   5   4     49.04    125.65     55.84 <
  -1   5   4  29335.00  27572.20    425.80 o
   0   5   4    402.58    356.00     83.76 o
   1   5   4  20439.20  19600.70    349.02 o
   2   5   4    186.14    157.06     62.82 <
   3   5   4  31640.70  31236.90    397.88 o
   4   5   4  19720.20  19457.60    303.64 o
   5   5   4    498.42    614.27     83.76 o
   6   5   4    991.53    813.21    115.18 o
   7   5   4  19986.60  20703.60    694.54 o
   8   5   4  29490.40  29840.80    921.40 o
   9   5   4    610.56    698.03    258.27 <
  10   5   4    196.63    -48.86    272.23 <
  11   5   4   6172.59   5706.40    457.21 o
 -11   6   4   6763.99   6934.94    673.60 o
 -10   6   4   2767.26   3036.43    467.68 o
  -9   6   4  28089.40  28483.10   1270.42 o
  -8   6   4   2817.72   2561.77    258.27 o
  -7   6   4   5734.79   5472.56    258.27 o
  -6   6   4    542.91    565.41    139.61 o
  -5   6   4  15923.90  16393.30    310.62 o
  -4   6   4  78189.10  80123.50   1033.09 o
  -3   6   4    946.34    991.20     62.82 o
  -2   6   4   2321.47   2279.07     90.74 o
  -1   6   4  43967.50  42143.60   1270.42 o
   0   6   4  20809.60  19806.60    439.76 o
   1   6   4  48271.80  46125.90    830.66 o
   2   6   4    180.04    157.06    118.67 <
   3   6   4    873.09   1033.09    143.10 o
   4   6   4  65577.10  63925.70   1123.83 o
   5   6   4   8945.13   9144.20    300.15 o
   6   6   4    220.63    324.58    188.47 <
   7   6   4   1684.92   1200.61    219.88 o
   8   6   4   1565.57   1378.61    240.82 o
   9   6   4  16548.90  17356.50    743.40 o
  10   6   4    165.76    307.13    328.07 <
  11   6   4   5972.28   4435.99    652.66 o
 -10   7   4  13082.90  11283.70    774.81 o
  -9   7   4    295.67    418.82    349.02 <
  -8   7   4   6837.63   7413.09    579.37 o
  -7   7   4  10686.80  11084.70    673.60 o
  -6   7   4    910.27    883.01    293.17 o
  -5   7   4  10151.40  11548.90    645.68 o
  -4   7   4   1000.09   1319.28    296.66 o
  -3   7   4   1091.11    952.81    265.25 o
  -2   7   4   9475.15  10819.50    523.52 o
  -1   7   4   5206.70   5256.17    362.98 o
   0   7   4    278.52    104.71    331.57 <
   1   7   4   1204.95    931.87    188.47 o
   2   7   4  12467.20  11555.90    572.39 o
   3   7   4     91.10   -178.00    233.84 <
   4   7   4   2567.12   1971.94    324.58 o
   5   7   4   9811.46   8170.45    495.60 o
   6   7   4    153.89      3.49    296.66 <
   7   7   4  12405.70  11604.80    617.76 o
   8   7   4   6390.83   5709.89    478.15 o
   9   7   4    680.03    767.83    338.55 <
  -8   8   4      2.00    970.26    356.00 <
  -7   8   4   9302.53  10002.80    652.66 o
  -6   8   4   8738.30   8159.98    579.37 o
  -5   8   4    995.98    917.91    307.13 <
  -4   8   4    691.93    680.58    328.07 <
  -3   8   4   5674.98   6034.48    457.21 o
  -2   8   4  16397.10  18742.10    757.36 o
  -1   8   4   4516.72   4648.89    579.37 o
   0   8   4      0.55   -108.19    397.88 <
   1   8   4   4198.92   3905.48    547.95 o
   2   8   4  12789.80  11486.10    750.38 o
   3   8   4   4124.26   3744.94    523.52 o
   4   8   4     22.11   -275.72    656.15 <
   5   8   4    273.89    335.05    614.27 <
   6   8   4   6951.48   6732.51    938.85 o
 -15   1   5    436.14    513.05    432.78 <
 -14   1   5   5025.95   4059.05    286.19 o
 -13   1   5   6292.03   5730.83    300.15 o
 -12   1   5  12073.10  13325.40    390.90 o
 -11   1   5   5638.79   6669.69    265.25 o
 -10   1   5    205.26    387.41    150.08 <
  -9   1   5    167.48    286.19    150.08 <
  -8   1   5   2978.00   3378.47    157.06 o
  -7   1   5   4954.99   4865.27    178.00 o
  -6   1   5  49219.30  50387.40    795.76 o
  -5   1   5   3132.43   3092.28    125.65 o
  -4   1   5  20823.50  20469.80    331.57 o
  -3   1   5  31292.80  32448.00    506.07 o
  -2   1   5   6312.16   6160.12    150.08 o
  -1   1   5  55829.00  54066.00    806.23 o
   0   1   5   6558.12   5891.38    150.08 o
   1   1   5  11757.00  11583.80    279.21 o
   2   1   5  75571.60  72996.60   1221.55 o
   3   1   5  47068.70  44715.90    914.42 o
   4   1   5    544.49    547.95    108.19 o
   5   1   5   4613.22   4474.38    240.82 o
   6   1   5    101.33    108.19     87.25 <
   7   1   5  28984.00  28238.80    673.60 o
   8   1   5  23175.40  22878.00    600.31 o
   9   1   5   8200.74   7336.30    394.39 o
  10   1   5   2262.99   2642.05    324.58 o
  11   1   5  10230.20  11001.00    596.82 o
  12   1   5    953.68    963.28    338.55 <
 -15   2   5    160.79     73.29    380.43 <
 -14   2   5  29225.80  28982.20    652.66 o
 -13   2   5   6556.87   6498.67    296.66 o
 -12   2   5   4598.50   4418.54    237.33 o
 -11   2   5    867.98    900.46    157.06 o
 -10   2   5  14247.40  14337.60    362.98 o
  -9   2   5 142833.00 141589.00   2045.23 o
  -8   2   5    154.99    223.37     90.74 <
  -7   2   5    793.27    917.91    108.19 o
  -6   2   5  50539.60  51804.40    813.21 o
  -5   2   5  50613.60  51835.80    869.05 o
  -4   2   5 103322.00 100747.00   1800.92 o
  -3   2   5   1252.01   1347.20     94.23 o
  -2   2   5   7264.40   7133.88    160.55 o
  -1   2   5 198261.00 189962.00   2596.67 o
   0   2   5  32546.20  30528.40    425.80 o
   1   2   5   3091.94   3071.34    111.68 o
   2   2   5    372.54    303.64     59.33 o
   3   2   5   2137.67   2090.60    101.21 o
   4   2   5  74013.40  72316.00   1012.14 o
   5   2   5    567.60    935.36    108.19 o
   6   2   5  67833.80  68864.20   1008.65 o
   7   2   5   3293.08   3224.90    230.35 o
   8   2   5   1773.20   1417.00    195.45 o
   9   2   5      8.34    429.29    164.04 <
  10   2   5   9239.86   9981.84    450.23 o
  11   2   5  26665.60  28546.00    844.62 o
  12   2   5   2269.72   2383.78    335.05 o
 -14   3   5     31.71    -41.88    467.68 <
 -13   3   5  15514.20  15286.90    429.29 o
 -12   3   5  18235.00  17831.20    443.25 o
 -11   3   5   2303.88   2376.79    188.47 o
 -10   3   5   4784.54   5088.65    233.84 o
  -9   3   5   2888.26   2771.18    191.96 o
  -8   3   5  16584.90  17094.80    383.92 o
  -7   3   5    277.82    390.90    104.71 o
  -6   3   5  52062.50  53095.70    910.93 o
  -5   3   5   9157.67   9126.75    237.33 o
  -4   3   5  15519.10  15499.80    275.72 o
  -3   3   5   4604.80   4481.36    143.10 o
  -2   3   5  78011.50  75896.90   1005.16 o
  -1   3   5  68804.20  65649.80    883.01 o
   0   3   5   2902.50   2593.18     97.72 o
   1   3   5    411.52    499.09     66.31 o
   2   3   5  83184.50  80161.90   1015.63 o
   3   3   5 107053.00 106666.00   1315.79 o
   4   3   5  10003.00   9964.39    223.37 o
   5   3   5    699.56    670.11     90.74 o
   6   3   5  16608.80  17084.30    328.07 o
   7   3   5  68338.70  69541.30   1807.90 o
   8   3   5  19400.30  20110.30    764.34 o
   9   3   5    457.52    561.91    279.21 <
  10   3   5   2182.05   1912.60    275.72 o
  11   3   5  25191.30  27505.90    820.19 o
  12   3   5  10935.70  11863.00    547.95 o
 -13   4   5  17913.00  16121.00    729.44 o
 -12   4   5    175.64    223.37    233.84 <
 -11   4   5   5325.63   4858.29    303.64 o
 -10   4   5  28227.90  28287.70    603.80 o
  -9   4   5  12680.20  13133.50    349.02 o
  -8   4   5  26346.90  26298.30    478.15 o
  -7   4   5   1680.46   1759.04    115.18 o
  -6   4   5  13839.60  13803.60    310.62 o
  -5   4   5  75066.20  74623.00   1245.99 o
  -4   4   5   7575.85   7769.08    230.35 o
  -3   4   5   2911.76   2823.53    101.21 o
  -2   4   5  14206.10  14246.80    261.76 o
  -1   4   5  22450.60  19859.00    349.02 o
   0   4   5  43316.30  40957.00    610.78 o
   1   4   5     32.60     13.96     69.80 <
   2   4   5   6850.31   6638.27    174.51 o
   3   4   5  22005.80  22298.60    369.96 o
   4   4   5   3945.62   3961.33    136.12 o
   5   4   5    137.23      6.98     80.27 <
   6   4   5   2120.78   2149.94    122.15 o
   7   4   5   7375.37   6749.96    404.86 o
   8   4   5   4267.78   4160.26    359.49 o
   9   4   5     81.35     13.96    268.74 <
  10   4   5  11206.10  12623.90    631.72 o
  11   4   5   2336.01   2149.94    307.13 o
 -12   5   5   1277.97   1228.53    265.25 o
 -11   5   5  10294.60   9576.98    411.84 o
 -10   5   5    812.78    663.13    198.94 o
  -9   5   5     22.30    205.92    157.06 <
  -8   5   5    307.15    938.85    146.59 o
  -7   5   5  11267.30  11168.50    265.25 o
  -6   5   5   5609.80   5706.40    174.51 o
  -5   5   5    703.64    855.09    101.21 o
  -4   5   5  25087.40  24612.60    415.33 o
  -3   5   5   4450.75   4484.85    132.63 o
  -2   5   5  11226.10  10512.30    198.94 o
  -1   5   5   2477.44   2450.09    118.67 o
   0   5   5    557.71    547.95     87.25 o
   1   5   5  37159.50  34053.40    677.09 o
   2   5   5    201.76    439.76     80.27 o
   3   5   5   1631.28   1588.02     94.23 o
   4   5   5  24251.50  24560.20    352.51 o
   5   5   5    323.43    268.74     87.25 o
   6   5   5  13900.60  13702.30    342.04 o
   7   5   5   3037.60   2718.83    240.82 o
   8   5   5    111.77    369.96    198.94 <
   9   5   5  19520.60  20263.80    617.76 o
  10   5   5    542.62    226.86    237.33 <
  11   5   5     74.91    317.60    317.60 <
 -11   6   5  10217.00  10592.60    802.73 o
 -10   6   5    548.18    732.93    247.80 <
  -9   6   5   8775.71   9803.84    457.21 o
  -8   6   5   3434.54   3762.39    244.31 o
  -7   6   5   9165.72   9482.75    331.57 o
  -6   6   5     24.39    157.06     97.72 <
  -5   6   5    828.36    945.83     90.74 o
  -4   6   5   3357.82   3347.06    115.18 o
  -3   6   5   9941.51   9706.12    181.49 o
  -2   6   5   9628.14   8955.74    205.92 o
  -1   6   5  10058.60   8934.79    181.49 o
   0   6   5    813.25    785.28     83.76 o
   1   6   5   4646.93   4254.50    143.10 o
   2   6   5   4652.05   4394.10    153.57 o
   3   6   5     95.65     69.80    132.63 <
   4   6   5  10651.80  11224.30    307.13 o
   5   6   5    167.86    366.47    184.98 <
   6   6   5  12481.00  13084.60    457.21 o
   7   6   5    819.34    422.31    212.90 <
   8   6   5   2031.43   1724.14    328.07 o
   9   6   5    350.99    -52.35    303.64 <
  10   6   5    546.08   -223.37    492.11 <
 -10   7   5   7065.47   6589.41    652.66 o
  -9   7   5    947.33   1266.93    383.92 o
  -8   7   5  19174.00  19684.50    980.73 o
  -7   7   5    265.14    338.55    307.13 <
  -6   7   5   9416.02  10177.30    638.70 o
  -5   7   5    939.63   1343.71    324.58 o
  -4   7   5   4730.58   5814.60    481.64 o
  -3   7   5   7935.00   8613.70    551.44 o
  -2   7   5  20751.40  21932.10    785.28 o
  -1   7   5  13104.80  14564.40    617.76 o
   0   7   5   5901.08   6564.98    544.46 o
   1   7   5   1202.52   1193.63    251.29 o
   2   7   5   2861.51   3074.83    307.13 o
   3   7   5  16478.70  16491.00    579.37 o
   4   7   5    820.08    506.07    568.90 <
   5   7   5   7701.38   6802.31    802.73 o
   6   7   5    870.82    362.98    509.56 <
   7   7   5  13691.90  11971.20    987.71 o
   8   7   5    302.39   -244.31    506.07 <
   9   7   5   1417.73   1448.41    547.95 <
  -8   8   5   9098.02   8680.01    649.17 o
  -7   8   5    358.25    896.97    362.98 <
  -6   8   5    214.26    198.94    296.66 <
  -5   8   5  39719.40  41201.30   1588.02 o
  -4   8   5   2595.07   2656.01    387.41 o
  -3   8   5     82.24    240.82    293.17 <
  -2   8   5   2105.25   2331.42    356.00 o
  -1   8   5   1704.46   1961.47    596.82 o
   0   8   5  23059.80  23272.30   1047.05 o
   1   8   5     90.12     38.39    422.31 <
   2   8   5   7754.44   9029.03    680.58 o
   3   8   5  11775.60  11524.50    739.91 o
   4   8   5   1252.27   1207.59    645.68 <
   5   8   5     87.99    191.96    638.70 <
   6   8   5   1011.73   1057.52    628.23 <
 -14   0   6  18730.90  16498.00    994.69 o
 -13   0   6  27050.20  26343.70    903.95 o
 -12   0   6   1848.74   1657.82    275.72 o
 -11   0   6   1416.69   1790.45    265.25 o
 -10   0   6 134126.00 136842.00   4453.44 o
  -9   0   6  14064.20  15925.60    813.21 o
  -8   0   6   1061.31   1158.73    174.51 o
  -7   0   6  10096.90  10442.50    394.39 o
  -6   0   6   3697.30   3556.47    212.90 o
  -5   0   6 109703.00 110013.00   2443.11 o
  -4   0   6   2407.43   2729.30    167.53 o
  -3   0   6  88957.50  91389.70   2917.77 o
  -2   0   6  43198.90  42258.80    823.68 o
  -1   0   6   9221.28   8655.58    335.05 o
   0   0   6   9778.18  10163.30    366.47 o
   1   0   6  24669.70  23638.80    471.17 o
   2   0   6  84996.90  81233.30   1528.69 o
   3   0   6  35385.60  34004.60    774.81 o
   4   0   6     53.86     10.47    108.19 <
   5   0   6 159135.00 156471.00   2893.34 o
   6   0   6  10977.70  10596.10    471.17 o
   7   0   6   3469.64   3706.54    314.11 o
   8   0   6    122.33    143.10    150.08 <
   9   0   6   7951.97   7598.07    331.57 o
  10   0   6  80395.30  81142.60   2128.99 o
  11   0   6   1279.60   1134.30    495.60 <
  12   0   6    260.80    223.37    527.01 <
 -15   1   6  12368.50  11409.30    865.56 o
 -14   1   6    340.39    247.80    216.39 <
 -13   1   6   6577.69   6533.57    310.62 o
 -12   1   6   6773.36   6648.74    286.19 o
 -11   1   6  14600.00  14903.00    397.88 o
 -10   1   6  16304.70  16501.40    453.72 o
  -9   1   6    132.94    202.43    157.06 <
  -8   1   6      2.42    139.61     97.72 <
  -7   1   6  98346.80 101413.00   1361.16 o
  -6   1   6  80812.80  83728.80   1242.49 o
  -5   1   6    961.11   1225.04     94.23 o
  -4   1   6   5304.59   5730.83    150.08 o
  -3   1   6  47192.80  48185.10    725.95 o
  -2   1   6 161637.00 158296.00   1989.39 o
  -1   1   6  59694.80  57625.90    973.75 o
   0   1   6  11048.50  10753.20    226.86 o
   1   1   6  35032.80  34126.70    579.37 o
   2   1   6 111727.00 109950.00   1745.08 o
   3   1   6  29438.30  27725.80    694.54 o
   4   1   6   5315.78   4753.59    258.27 o
   5   1   6   3680.12   3200.47    174.51 o
   6   1   6  29218.30  27673.40    872.54 o
   7   1   6  39441.90  40025.10   1158.73 o
   8   1   6   1831.86   2118.52    289.68 o
   9   1   6    838.88    663.13    251.29 <
  10   1   6   2415.43   2341.89    342.04 o
  11   1   6   4269.86   3696.07    408.35 o
  12   1   6   1459.01   1567.08    383.92 o
 -15   2   6   1440.69   1549.63    464.19 o
 -14   2   6   7789.93   7807.48    342.04 o
 -13   2   6   1037.21    715.48    188.47 o
 -12   2   6   1137.62   1088.93    181.49 o
 -11   2   6   5062.77   5346.92    244.31 o
 -10   2   6   2619.63   2778.16    178.00 o
  -9   2   6  11787.20  12400.50    425.80 o
  -8   2   6    391.22    568.90    115.18 o
  -7   2   6    443.18    589.84     94.23 o
  -6   2   6  17984.10  18033.60    362.98 o
  -5   2   6    356.44    349.02     69.80 o
  -4   2   6    152.46    167.53     69.80 <
  -3   2   6    731.88    858.58     73.29 o
  -2   2   6   2600.16   2722.32    115.18 o
  -1   2   6   9255.97   8861.50    216.39 o
   0   2   6    334.46    265.25     55.84 o
   1   2   6  11776.70  11322.10    233.84 o
   2   2   6   2041.01   1954.49    104.71 o
   3   2   6   1541.63   1525.20    101.21 o
   4   2   6   1385.80   1469.35    115.18 o
   5   2   6   2979.97   3242.35    167.53 o
   6   2   6  15731.20  15443.90    481.64 o
   7   2   6   1626.86   1542.65    286.19 o
   8   2   6    375.77    537.48    195.45 <
   9   2   6   6247.61   6491.69    366.47 o
  10   2   6   3158.21   2743.26    303.64 o
  11   2   6   3447.66   3476.19    349.02 o
  12   2   6    958.91   1102.89    474.66 <
 -13   3   6   6984.37   6477.73    293.17 o
 -12   3   6   4270.00   4219.60    240.82 o
 -11   3   6   1239.21   1218.06    164.04 o
 -10   3   6   1123.20   1256.46    146.59 o
  -9   3   6    139.52    404.86    153.57 <
  -8   3   6  17828.80  18131.40    774.81 o
  -7   3   6  13299.70  13321.90    338.55 o
  -6   3   6    963.92    841.13    108.19 o
  -5   3   6  12126.80  12445.90    300.15 o
  -4   3   6   4158.15   4226.58    150.08 o
  -3   3   6   5620.67   5908.83    157.06 o
  -2   3   6   5881.66   6003.07    157.06 o
  -1   3   6   6309.72   5793.66    160.55 o
   0   3   6  42626.90  40419.50    600.31 o
   1   3   6   4630.58   4547.67    146.59 o
   2   3   6   1946.58   1814.88    108.19 o
   3   3   6   3878.76   4003.21    136.12 o
   4   3   6   2030.05   1947.51    115.18 o
   5   3   6  10507.40  10299.40    223.37 o
   6   3   6   1694.43   1556.61    146.59 o
   7   3   6   7485.88   7168.78    335.05 o
   8   3   6   8952.10   9039.50    513.05 o
   9   3   6     46.64    425.80    296.66 <
  10   3   6   1968.06   1804.41    286.19 o
  11   3   6    409.92    774.81    293.17 <
 -13   4   6   7094.67   6456.79    397.88 o
 -12   4   6   4444.78   3720.50    310.62 o
 -11   4   6    479.13    799.24    216.39 o
 -10   4   6  40817.90  40765.00    795.76 o
  -9   4   6   2688.68   2760.71    178.00 o
  -8   4   6   2771.50   2701.38    188.47 o
  -7   4   6     90.51    104.71     97.72 <
  -6   4   6    747.44    743.40    104.71 o
  -5   4   6  48906.10  46949.60    935.36 o
  -4   4   6   3192.02   3706.54    136.12 o
  -3   4   6  33022.70  33037.80    502.58 o
  -2   4   6   7156.92   7224.62    181.49 o
  -1   4   6   5141.38   5053.74    153.57 o
   0   4   6    335.66    296.66     80.27 o
   1   4   6  15534.10  14421.30    275.72 o
   2   4   6  25950.00  24930.20    404.86 o
   3   4   6  23398.80  24047.20    401.37 o
   4   4   6   1274.03   1483.32    108.19 o
   5   4   6  29944.40  30846.00    429.29 o
   6   4   6   2879.92   2994.55    240.82 o
   7   4   6     62.55     34.90    181.49 <
   8   4   6   1460.67   1214.57    219.88 o
   9   4   6    988.81   1165.71    237.33 o
  10   4   6  22836.70  23335.20    691.05 o
  11   4   6    100.53   -247.80    282.70 <
 -12   5   6     27.26    -41.88    230.35 <
 -11   5   6  17941.90  16079.10    638.70 o
 -10   5   6   8730.57   9036.01    369.96 o
  -9   5   6   1698.27   1305.32    188.47 o
  -8   5   6     51.46    195.45    146.59 <
  -7   5   6  27489.50  27401.20    488.62 o
  -6   5   6  37626.60  39295.60    827.17 o
  -5   5   6   1995.49   2128.99    115.18 o
  -4   5   6    441.49    551.44     83.76 o
  -3   5   6  22493.60  21583.10    380.43 o
  -2   5   6  70627.80  68250.00   1064.50 o
  -1   5   6   4208.83   3846.15    139.61 o
   0   5   6    237.28    171.02     94.23 <
   1   5   6   6546.31   6585.92    230.35 o
   2   5   6  43702.10  43044.10    610.78 o
   3   5   6  18455.20  19049.30    317.60 o
   4   5   6   3001.83   3134.16    136.12 o
   6   5   6  19567.00  18972.50    684.07 o
   7   5   6  13389.20  13290.50    464.19 o
   8   5   6    462.92    513.05    205.92 <
   9   5   6   5038.79   4415.04    328.07 o
  10   5   6   1304.31    921.40    335.05 <
  11   5   6   8905.67   8331.00    746.89 o
 -10   6   6   9677.90   8502.02    492.11 o
  -9   6   6  20522.30  19325.00    554.93 o
  -8   6   6     85.68    178.00    164.04 <
  -7   6   6    814.56    938.85    136.12 o
  -6   6   6  32488.20  32081.50    495.60 o
  -5   6   6   3028.24   2924.75    157.06 o
  -4   6   6     56.44     45.37     97.72 <
  -3   6   6   1693.37   1357.67    125.65 o
  -2   6   6   1438.61   1322.77    101.21 o
  -1   6   6  17482.10  17387.90    387.41 o
   0   6   6   1436.69   1078.46    118.67 o
   1   6   6  28552.00  27429.10    432.78 o
   2   6   6    144.40    174.51    136.12 <
   3   6   6   1141.21    956.30    150.08 o
   4   6   6   1013.23    642.19    132.63 o
   5   6   6   7022.94   6418.39    328.07 o
   6   6   6  33880.60  32060.60   1005.16 o
   7   6   6     23.12    118.67    202.43 <
   8   6   6    532.51    -34.90    289.68 <
   9   6   6  15138.90  15000.70    677.09 o
  10   6   6   5579.01   5189.86    673.60 o
  -9   7   6    276.58     31.41    352.51 <
  -8   7   6  15903.50  17318.10    935.36 o
  -7   7   6   2159.03   1689.23    387.41 o
  -6   7   6   7964.87   7999.43    589.84 o
  -5   7   6  16304.70  16197.80    841.13 o
  -4   7   6    408.61    586.35    307.13 <
  -3   7   6  25556.40  25987.70   1120.34 o
  -2   7   6  12279.20  13217.20    600.31 o
  -1   7   6   2098.16   2024.29    314.11 o
   0   7   6  25929.50  27544.30   1399.55 o
   1   7   6   2484.02   2167.39    272.23 o
   2   7   6   8478.18   8505.51    589.84 o
   3   7   6  19901.40  21684.30    903.95 o
   4   7   6     87.32    108.19    474.66 <
   5   7   6  10152.50   8529.94    869.05 o
   6   7   6   2705.57   2840.99    631.72 o
   7   7   6     62.63   -188.47    506.07 <
   8   7   6   6018.84   4666.34    677.09 o
  -8   8   6   5358.45   4844.33    551.44 o
  -7   8   6   2721.75   2345.38    418.82 o
  -6   8   6     16.31    108.19    328.07 <
  -5   8   6   1192.21   1556.61    359.49 o
  -4   8   6   1615.36   1706.69    356.00 o
  -3   8   6   5189.82   5196.84    453.72 o
  -2   8   6    484.07    209.41    307.13 <
  -1   8   6   3190.44   3200.47    628.23 o
   0   8   6     95.10   -499.09    513.05 <
   1   8   6    789.43    533.99    415.33 <
   2   8   6    129.96    219.88    404.86 <
   3   8   6   9338.78   8641.62    652.66 o
   4   8   6   3489.74   2774.67    729.44 o
   5   8   6     17.10     59.33    579.37 <
   6   8   6    544.40    520.03    600.31 <
 -15   1   7   2918.42   2704.87    540.97 o
 -14   1   7   1099.04   1350.69    230.35 o
 -13   1   7   2755.88   3148.12    258.27 o
 -12   1   7   3013.93   3092.28    240.82 o
 -11   1   7  20240.80  20602.40    488.62 o
 -10   1   7   8177.43   7891.24    376.94 o
  -9   1   7  10393.80  10149.40    401.37 o
  -8   1   7  23221.40  23349.10    628.23 o
  -7   1   7  32498.20  34029.00    547.95 o
  -6   1   7   6911.33   7339.79    212.90 o
  -5   1   7   2054.17   2052.21    115.18 o
  -4   1   7   4430.15   4477.87    146.59 o
  -3   1   7  38056.60  37379.60    603.80 o
  -2   1   7  46889.40  45075.30    715.48 o
  -1   1   7  12195.70  11618.70    300.15 o
   0   1   7    166.51    244.31     76.78 o
   1   1   7  11158.30  11140.60    272.23 o
   2   1   7   4129.92   3546.00    167.53 o
   3   1   7   8482.16   8146.02    293.17 o
   4   1   7  16991.50  16571.30    516.54 o
   5   1   7    380.20    324.58    157.06 <
   6   1   7  17035.00  16155.90    628.23 o
   7   1   7   3854.54   4463.91    345.52 o
   8   1   7   1763.37   1818.37    282.70 o
   9   1   7   2133.47   1951.00    314.11 o
  10   1   7     17.73     38.39    282.70 <
  11   1   7   2759.34   2753.73    390.90 o
  12   1   7   7683.36   7591.09    736.42 o
 -14   2   7  26437.70  27963.10    952.81 o
 -13   2   7   2516.76   2216.25    223.37 o
 -12   2   7   9299.84   9863.18    338.55 o
 -11   2   7  23934.30  24982.50    537.48 o
 -10   2   7   5880.70   6010.05    317.60 o
  -9   2   7    949.59   1340.22    202.43 o
  -8   2   7   9934.34   9765.45    321.09 o
  -7   2   7  18995.20  18264.00    349.02 o
  -6   2   7  40877.50  40060.00    610.78 o
  -5   2   7   1179.23   1252.97     94.23 o
  -4   2   7 122941.00 118459.00   1874.21 o
  -3   2   7   4475.96   4394.10    146.59 o
  -2   2   7   1096.58   1047.05     90.74 o
  -1   2   7    413.57    321.09     76.78 o
   0   2   7  23764.30  23017.60    331.57 o
   1   2   7 171574.00 164711.00   1951.00 o
   2   2   7   2514.17   2603.66    122.15 o
   3   2   7   2371.70   2097.58    157.06 o
   4   2   7  53548.80  52858.40    903.95 o
   5   2   7  33654.00  33547.40    708.50 o
   6   2   7  24400.00  22204.40    614.27 o
   7   2   7     52.23    115.18    178.00 <
   8   2   7    156.96     17.45    153.57 <
   9   2   7  56521.90  56952.30   1211.08 o
  10   2   7   5701.20   5109.59    369.96 o
  11   2   7    193.18      3.49    279.21 <
 -13   3   7   1878.82   1727.63    247.80 o
 -12   3   7  19659.30  18435.00    460.70 o
 -11   3   7  45646.40  44468.10    799.24 o
 -10   3   7   6534.36   6676.67    275.72 o
  -9   3   7     96.73    307.13    160.55 <
  -8   3   7  38419.80  36911.90   1026.11 o
  -7   3   7  71564.90  72766.20   1385.59 o
  -6   3   7  21699.30  22473.10    513.05 o
  -5   3   7    344.21    387.41     87.25 o
  -4   3   7   3215.00   3385.45    125.65 o
  -3   3   7  86482.80  86238.20   1155.24 o
  -2   3   7  41061.80  39372.40    593.33 o
  -1   3   7   7324.98   7043.13    184.98 o
   0   3   7     39.64     62.82     69.80 <
   1   3   7  26251.00  25792.20    446.74 o
   2   3   7  26647.90  27038.20    432.78 o
   3   3   7     78.70     69.80     80.27 <
   4   3   7  19683.30  19932.30    356.00 o
   5   3   7    349.29    307.13    129.14 <
   6   3   7  16372.30  15485.80    502.58 o
   7   3   7   1379.33   1930.06    230.35 o
   8   3   7  14948.50  15084.40    513.05 o
   9   3   7   6502.08   6770.90    366.47 o
  10   3   7    227.24    520.03    251.29 <
  11   3   7    143.14     66.31    275.72 <
 -13   4   7      0.04     87.25    265.25 <
 -12   4   7     98.96    -27.92    226.86 <
 -11   4   7    441.47    565.41    205.92 <
 -10   4   7  11077.90  10749.70    338.55 o
  -9   4   7   1623.51   1595.00    191.96 o
  -8   4   7  16256.60  16955.20    575.88 o
  -7   4   7    619.13    938.85    118.67 o
  -6   4   7    177.70    376.94     97.72 o
  -5   4   7   1808.98   1577.55    122.15 o
  -4   4   7  14109.40  14362.00    300.15 o
  -3   4   7  49963.50  49183.30    715.48 o
  -2   4   7    107.14    143.10     80.27 <
  -1   4   7   4907.58   4753.59    157.06 o
   0   4   7  38012.80  36185.90    624.74 o
   1   4   7  15373.00  15129.80    293.17 o
   2   4   7  25969.50  25003.50    415.33 o
   3   4   7   2413.56   2554.79    125.65 o
   4   4   7   9987.99  10435.60    244.31 o
   5   4   7  46939.00  47169.40    900.46 o
   6   4   7   7410.22   7242.07    342.04 o
   7   4   7   1731.95   1378.61    219.88 o
   8   4   7  10537.00  10732.20    432.78 o
   9   4   7   6216.65   5832.05    356.00 o
  10   4   7  10773.40  10864.80    635.21 o
 -13   5   7    136.74   -198.94    467.68 <
 -12   5   7   7929.75   7168.78    397.88 o
 -11   5   7   1314.33   1280.89    212.90 o
 -10   5   7    233.43     59.33    181.49 <
  -9   5   7  26523.60  26036.60    663.13 o
  -8   5   7    127.64    254.78    153.57 <
  -7   5   7   3982.30   4017.17    289.68 o
  -6   5   7  16434.30  16309.50    338.55 o
  -5   5   7    138.57    164.04     87.25 <
  -4   5   7  24229.20  23827.30    474.66 o
  -3   5   7    691.54    725.95    136.12 o
  -2   5   7   1141.60   1165.71    101.21 o
  -1   5   7  33217.40  31732.50    540.97 o
   0   5   7    647.21    422.31    108.19 o
   1   5   7     12.35    -97.72    118.67 <
   2   5   7   6944.21   6742.98    195.45 o
   3   5   7   4756.24   4422.03    167.53 o
   4   5   7   6310.85   6620.82    174.51 o
   5   5   7    181.85     38.39    188.47 <
   6   5   7   8122.42   8844.05    460.70 o
   7   5   7   2882.83   2649.03    258.27 o
   8   5   7   2269.56   3032.94    279.21 o
   9   5   7   1180.09   1469.35    335.05 o
  10   5   7     41.73   -202.43    317.60 <
 -10   6   7   1932.77   1626.41    310.62 o
  -9   6   7    427.55    328.07    181.49 <
  -8   6   7   2438.39   2142.95    171.02 o
  -7   6   7   1533.58   1354.18    136.12 o
  -6   6   7  16066.00  16194.30    390.90 o
  -5   6   7    448.14    418.82    122.15 o
  -4   6   7   8399.90   8763.78    258.27 o
  -3   6   7    494.41    303.64    104.71 <
  -2   6   7   3545.11   3692.58    209.41 o
  -1   6   7   6131.45   5692.44    209.41 o
   0   6   7     87.78    240.82    111.68 <
   1   6   7   9339.52   9489.73    251.29 o
   2   6   7  11767.10  11747.90    293.17 o
   3   6   7   8381.19   8980.17    286.19 o
   4   6   7   1019.37    935.36    202.43 o
   5   6   7    543.73    872.54    254.78 o
   6   6   7    165.41    195.45    205.92 <
   7   6   7   6568.66   6334.63    446.74 o
   8   6   7   1259.14   1417.00    331.57 o
   9   6   7   5916.79   7507.32    732.93 o
  -9   7   7    887.51   1361.16    425.80 o
  -8   7   7    104.44    240.82    342.04 <
  -7   7   7  18145.50  18410.60    956.30 o
  -6   7   7   2173.94   2505.93    422.31 o
  -5   7   7  12384.60  12372.60    743.40 o
  -4   7   7    122.94    -80.27    174.51 <
  -3   7   7  14145.50  15248.50    827.17 o
  -2   7   7   3519.71   3500.62    349.02 o
  -1   7   7   1930.30   1832.33    314.11 o
   0   7   7   6998.34   8519.47    757.36 o
   1   7   7   3609.00   3723.99    582.86 o
   2   7   7  17449.30  17559.00    795.76 o
   3   7   7   4121.66   4324.30    446.74 o
   4   7   7   6072.28   5678.48    711.99 o
   5   7   7    125.12   -230.35    488.62 <
   6   7   7   4198.78   4066.03    649.17 o
   7   7   7   1628.08   1197.12    523.52 <
  -7   8   7   2613.92   2031.27    436.27 o
  -6   8   7    128.87   -115.18    349.02 <
  -5   8   7    132.07    502.58    321.09 <
  -4   8   7   4408.16   4516.26    506.07 o
  -3   8   7  15068.60  17112.20    746.89 o
  -2   8   7   4320.88   4264.97    429.29 o
  -1   8   7    134.88     48.86    537.48 <
   0   8   7  22299.80  25209.40   1413.51 o
   1   8   7   3015.14   3661.17    656.15 o
   2   8   7   3485.68   3291.22    642.19 o
   3   8   7    236.19   -125.65    362.98 <
   4   8   7   1205.96   1179.67    610.78 <
   5   8   7  28639.80  28825.20   1608.96 o
 -14   0   8   1597.00   2013.82    495.60 o
 -13   0   8  35600.10  39288.70   1204.10 o
 -12   0   8    215.00    362.98    251.29 <
 -11   0   8    962.15   1001.67    345.52 <
 -10   0   8    189.11    778.30    317.60 <
  -9   0   8  31492.50  33498.50   1392.57 o
  -8   0   8  94259.10  94883.30   3186.51 o
  -7   0   8  13083.90  12965.90    474.66 o
  -6   0   8   1440.05   1437.94    164.04 o
  -5   0   8 114779.00 110854.00   2509.42 o
  -4   0   8  41728.70  41281.50    865.56 o
  -3   0   8  39043.90  38775.60    827.17 o
  -2   0   8    344.30    356.00    132.63 <
  -1   0   8   8096.83   7566.65    366.47 o
   0   0   8 243169.00 222211.00   4854.80 o
   1   0   8   7934.95   7625.99    216.39 o
   2   0   8    221.19    369.96    108.19 o
   3   0   8  19761.60  21171.30    544.46 o
   4   0   8  19776.30  19325.00    551.44 o
   5   0   8  61049.20  59503.60   1574.06 o
   6   0   8     33.32    -66.31    202.43 <
   7   0   8   9822.64   9419.93    499.09 o
   8   0   8  31094.60  30570.30   1008.65 o
   9   0   8   5274.58   4627.94    670.11 o
  10   0   8   1107.89    917.91    502.58 <
  11   0   8   1276.98    600.31    533.99 <
 -14   1   8    850.93   1263.44    321.09 o
 -13   1   8   2300.98   2261.62    237.33 o
 -12   1   8  37048.50  39274.70    830.66 o
 -11   1   8  22250.00  23209.50    802.73 o
 -10   1   8   6305.51   6390.47    394.39 o
  -9   1   8   3363.95   3207.45    258.27 o
  -8   1   8  21018.40  20679.20    589.84 o
  -7   1   8  21312.80  22148.50    446.74 o
  -6   1   8   2760.67   2802.59    143.10 o
  -5   1   8  24806.20  24479.90    495.60 o
  -4   1   8  12253.60  12065.50    272.23 o
  -3   1   8  36790.20  35278.50    666.62 o
  -2   1   8   7703.04   7325.83    212.90 o
  -1   1   8   9480.40   8990.64    275.72 o
   0   1   8   5807.46   5828.56    191.96 o
   1   1   8   2824.12   2540.83    143.10 o
   2   1   8    825.63    551.44    111.68 o
   3   1   8  42302.60  44042.30    883.01 o
   4   1   8  21162.10  21960.10    544.46 o
   5   1   8    695.78    750.38    219.88 o
   6   1   8   4374.60   4299.87    342.04 o
   7   1   8  12773.20  12543.60    565.41 o
   8   1   8  27945.30  27453.60    942.34 o
   9   1   8   7288.85   7011.72    478.15 o
  10   1   8    650.60    670.11    303.64 <
  11   1   8  10413.50   8966.21    586.35 o
 -14   2   8     36.23   -310.62    376.94 <
 -13   2   8   2855.07   2582.71    237.33 o
 -12   2   8   4507.93   4683.79    265.25 o
 -11   2   8    147.85    209.41    216.39 <
 -10   2   8   2084.04   2237.19    244.31 o
  -9   2   8   7019.87   7085.01    335.05 o
  -8   2   8   5147.51   4976.96    272.23 o
  -7   2   8   7697.57   7863.32    282.70 o
  -6   2   8   1499.91   1312.30     94.23 o
  -5   2   8   6260.15   6313.69    178.00 o
  -4   2   8  29525.60  28507.60    418.82 o
  -3   2   8   5415.66   5228.25    153.57 o
  -2   2   8   4726.42   4844.33    171.02 o
  -1   2   8  17195.70  16138.50    345.52 o
   0   2   8   4968.34   4802.45    150.08 o
   1   2   8  20047.70  20113.80    383.92 o
   2   2   8    839.56    883.01     94.23 o
   3   2   8    758.49    631.72    136.12 o
   4   2   8  19660.00  19733.30    621.25 o
   5   2   8   1668.57   1329.75    282.70 o
   6   2   8    922.73    715.48    275.72 <
   7   2   8    696.39    579.37    205.92 <
   8   2   8    119.85    303.64    216.39 <
   9   2   8   3440.57   3692.58    335.05 o
  10   2   8     14.92    115.18    247.80 <
  11   2   8    953.25   1354.18    450.23 o
 -13   3   8   2901.14   2614.13    265.25 o
 -12   3   8   2029.10   1996.37    205.92 o
 -11   3   8   2933.35   3113.22    209.41 o
 -10   3   8  14258.90  13677.90    478.15 o
  -9   3   8   1078.60   1050.54    188.47 o
  -8   3   8    967.96    837.64    195.45 o
  -7   3   8    667.45    387.41    164.04 <
  -6   3   8   3098.69   3193.49    174.51 o
  -5   3   8  16224.70  16204.80    342.04 o
  -4   3   8   2427.27   2498.95    136.12 o
  -3   3   8  22307.30  21670.40    383.92 o
  -2   3   8  19276.10  18923.60    352.51 o
  -1   3   8   1715.67   1905.62    118.67 o
   0   3   8   1295.85   1326.26    101.21 o
   1   3   8    213.71    328.07     83.76 o
   2   3   8  12964.40  13074.10    275.72 o
   3   3   8  11899.20  12753.00    275.72 o
   4   3   8    579.51    530.50    254.78 <
   5   3   8  17579.80  17461.20    722.46 o
   6   3   8   1137.80   1448.41    223.37 o
   7   3   8   1005.61    774.81    209.41 o
   8   3   8   1327.09   1441.43    244.31 o
   9   3   8    307.98    711.99    244.31 <
  10   3   8  12398.70  14379.40    684.07 o
  11   3   8    806.29    582.86    436.27 <
 -13   4   8  15172.00  14152.60    561.91 o
 -12   4   8    119.95     80.27    223.37 <
 -11   4   8   1318.51   1410.02    233.84 o
 -10   4   8    737.46    701.52    195.45 o
  -9   4   8   8447.98   8432.21    356.00 o
  -8   4   8  31064.30  31404.40    907.44 o
  -7   4   8   9472.81   9807.33    418.82 o
  -6   4   8   4531.05   4079.99    164.04 o
  -5   4   8  27691.30  26657.80    530.50 o
  -4   4   8   9351.20   9332.67    265.25 o
  -3   4   8   2952.18   3008.51    139.61 o
  -2   4   8   4850.16   4746.61    167.53 o
  -1   4   8    396.98    383.92     97.72 o
   0   4   8  74110.10  71014.20   1106.38 o
   1   4   8   1105.58   1026.11    111.68 o
   2   4   8   6060.83   6090.32    191.96 o
   3   4   8   1644.37   1832.33    143.10 o
   4   4   8   5774.79   5992.59    258.27 o
   5   4   8  20345.50  20372.00    495.60 o
   6   4   8   1505.49   1106.38    212.90 o
   7   4   8   9609.99   8868.48    401.37 o
   8   4   8  10574.40  10393.70    436.27 o
   9   4   8   3269.17   3109.73    411.84 o
  10   4   8    280.51    219.88    265.25 <
 -12   5   8  20627.90  19010.90    624.74 o
 -11   5   8   4619.96   4093.95    272.23 o
 -10   5   8    923.40    956.30    205.92 o
  -9   5   8      7.68    146.59    174.51 <
  -8   5   8  18966.10  18393.10    970.26 o
  -7   5   8  17829.00  17021.50    607.29 o
  -6   5   8   4927.24   4711.71    184.98 o
  -5   5   8   5593.45   5406.25    184.98 o
  -4   5   8   6130.13   6132.20    191.96 o
  -3   5   8  21115.60  20766.40    443.25 o
  -2   5   8    863.77    785.28    118.67 o
  -1   5   8  26098.60  25293.10    530.50 o
   0   5   8   1009.11    855.09    188.47 o
   1   5   8  11281.10  11147.60    359.49 o
   2   5   8     23.56   -111.68    111.68 <
   3   5   8  27276.00  27872.40    499.09 o
   4   5   8  12852.10  12679.70    443.25 o
   5   5   8    224.24     59.33    202.43 <
   6   5   8    270.19    258.27    202.43 <
   7   5   8  13792.50  15457.90    645.68 o
   8   5   8  22896.90  24308.90    886.50 o
   9   5   8    429.21    540.97    310.62 <
 -10   6   8   3599.10   3162.08    356.00 o
  -9   6   8  24566.70  24462.50    551.44 o
  -8   6   8   3349.08   3224.90    184.98 o
  -7   6   8   7305.70   6303.22    254.78 o
  -6   6   8   1176.35   1092.42    178.00 o
  -5   6   8  12515.80  13248.60    415.33 o
  -4   6   8  56175.70  55196.80    963.28 o
  -3   6   8   1619.11   1640.37    150.08 o
  -2   6   8   1467.94   1315.79    136.12 o
  -1   6   8  28410.50  27683.90    572.39 o
   0   6   8  15050.90  15656.80    404.86 o
   1   6   8  24497.30  25275.70    554.93 o
   2   6   8    102.63    181.49    146.59 <
   3   6   8    453.34    900.46    181.49 o
   4   6   8  36561.00  36130.10   1099.40 o
   5   6   8   4770.75   5322.49    314.11 o
   6   6   8      0.54    293.17    272.23 <
   7   6   8    811.93    942.34    300.15 o
   8   6   8    672.51    509.56    457.21 <
  -8   7   8   3959.64   4313.83    540.97 o
  -7   7   8   5482.75   4854.80    537.48 o
  -6   7   8   1031.27    785.28    362.98 <
  -5   7   8   5282.72   4408.06    492.11 o
  -4   7   8    290.39    467.68    324.58 <
  -3   7   8   1792.63   1493.79    369.96 o
  -2   7   8   3078.14   2666.48    352.51 o
  -1   7   8   5795.49   6463.77    701.52 o
   0   7   8    709.32    823.68    439.76 <
   1   7   8    190.61    561.91    467.68 <
   2   7   8   9717.21   9828.27    816.70 o
   3   7   8    862.33    834.15    450.23 <
   4   7   8   2368.42   2767.69    568.90 o
   5   7   8   7256.81   6784.86    715.48 o
   6   7   8     74.46    157.06    436.27 <
  -7   8   8   8908.66   7919.16    673.60 o
  -6   8   8   6165.62   6432.35    600.31 o
  -5   8   8   1078.19   1521.71    415.33 o
  -4   8   8   1120.54   1521.71    418.82 o
  -3   8   8   3525.28   4034.62    436.27 o
  -2   8   8  13869.40  14885.50    708.50 o
  -1   8   8   2969.45   2415.19    600.31 o
   0   8   8     34.63    286.19    502.58 <
   1   8   8   3056.39   3148.12    659.64 o
   2   8   8   7141.68   7856.34    799.24 o
   3   8   8   2702.87   2980.59    614.27 o
   5   8   8      4.41    191.96    513.05 <
 -14   1   9   5400.62   4805.94    600.31 o
 -13   1   9   5393.53   5228.25    303.64 o
 -12   1   9  11425.70  11433.70    565.41 o
 -11   1   9   7896.66   8620.68    478.15 o
 -10   1   9    199.48    415.33    226.86 <
  -9   1   9     10.46    345.52    195.45 <
  -8   1   9    971.94   1193.63    219.88 o
  -7   1   9   4912.12   5029.31    314.11 o
  -6   1   9  32145.10  32004.70    621.25 o
  -5   1   9   3142.20   3340.08    150.08 o
  -4   1   9  21247.10  20536.10    401.37 o
  -3   1   9  11638.60  11112.70    272.23 o
  -2   1   9   4813.78   4432.50    181.49 o
  -1   1   9  22861.90  21544.70    499.09 o
   0   1   9   3326.26   3333.10    146.59 o
   1   1   9  12797.00  12878.70    286.19 o
   2   1   9  30039.30  32210.60    617.76 o
   3   1   9  29982.80  29020.60   1469.35 o
   4   1   9     34.24    -13.96    195.45 <
   5   1   9   1323.80    855.09    237.33 o
   6   1   9     51.56    537.48    219.88 <
   7   1   9  12715.00  12798.40    596.82 o
   8   1   9  11513.40  12257.40    596.82 o
   9   1   9   4682.21   4425.52    422.31 o
  10   1   9    398.18    621.25    317.60 <
  11   1   9   5339.49   5067.70    596.82 o
 -14   2   9  27662.20  28088.80   1340.22 o
 -13   2   9   7671.50   7730.69    352.51 o
 -12   2   9   4510.91   4530.22    261.76 o
 -11   2   9   1035.13    959.79    233.84 o
 -10   2   9   8162.60   8163.47    383.92 o
  -9   2   9 100890.00 102440.00   2027.78 o
  -8   2   9    179.66    331.57    160.55 <
  -7   2   9   1577.52   1786.96    164.04 o
  -6   2   9  24401.70  23363.10    453.72 o
  -5   2   9  21540.90  20591.90    345.52 o
  -4   2   9  60403.20  58264.60    767.83 o
  -3   2   9   1134.72   1225.04    111.68 o
  -2   2   9   5482.47   5395.78    191.96 o
  -1   2   9  78997.00  75729.40   1162.22 o
   0   2   9  14655.10  14494.60    282.70 o
   1   2   9   1706.14   1588.02    125.65 o
   2   2   9   1080.09   1036.58    101.21 o
   3   2   9   1823.79   1668.29    314.11 o
   4   2   9  34062.60  34053.40   1148.26 o
   5   2   9    800.86    649.17    275.72 <
   6   2   9  41116.70  39232.80   1266.93 o
   7   2   9    921.47    614.27    212.90 <
   8   2   9    552.08    268.74    233.84 <
   9   2   9    622.98    219.88    240.82 <
  10   2   9   6587.60   6460.28    425.80 o
  11   2   9  15944.00  19066.70   1074.97 o
 -13   3   9  10537.60   9730.55    478.15 o
 -12   3   9   9537.42   9873.65    342.04 o
 -11   3   9   3121.76   3151.61    286.19 o
 -10   3   9   5386.63   5866.95    335.05 o
  -9   3   9    113.54    216.39    174.51 <
  -8   3   9   8116.50   8097.16    338.55 o
  -7   3   9    558.66    663.13    184.98 o
  -6   3   9  42191.10  42202.90    910.93 o
  -5   3   9   5567.32   6271.81    223.37 o
  -4   3   9   3379.76   3287.73    178.00 o
  -3   3   9   4394.23   4149.79    181.49 o
  -2   3   9  39588.20  38981.50    614.27 o
  -1   3   9  54627.60  51937.00    778.30 o
   0   3   9   1479.48   1368.14    122.15 o
   1   3   9    406.35    516.54     97.72 o
   2   3   9  53360.50  53123.60    827.17 o
   3   3   9  51325.10  52219.70   1186.65 o
   4   3   9   7021.48   7552.69    499.09 o
   5   3   9   1100.25    949.32    279.21 o
   6   3   9   7672.62   7133.88    485.13 o
   7   3   9  40634.50  41197.80   1319.28 o
   8   3   9  11327.50  11447.70    659.64 o
   9   3   9    465.64    390.90    254.78 <
  10   3   9   1440.47   1232.02    356.00 o
 -13   4   9  20617.90  19279.60    851.60 o
 -12   4   9    790.32    614.27    240.82 <
 -11   4   9   4713.87   3992.74    307.13 o
 -10   4   9  19412.80  19778.70   1095.91 o
  -9   4   9  10771.80  10568.20    478.15 o
  -8   4   9  22563.90  24431.10    771.32 o
  -7   4   9   1207.90    970.26    167.53 o
  -6   4   9   6330.52   6742.98    300.15 o
  -5   4   9  49390.20  49183.30    883.01 o
  -4   4   9   5930.99   5804.13    219.88 o
  -3   4   9   2251.04   2446.60    160.55 o
  -2   4   9   8169.72   8529.94    254.78 o
  -1   4   9   6830.86   6774.39    233.84 o
   0   4   9  20656.60  20319.70    558.42 o
   1   4   9     84.09    261.76    129.14 <
   2   4   9   4336.94   4174.22    188.47 o
   3   4   9   9110.47   9604.91    331.57 o
   4   4   9    420.55    931.87    265.25 o
   5   4   9    113.49     41.88    261.76 <
   6   4   9    777.99    963.28    303.64 o
   7   4   9   5683.66   5472.56    471.17 o
   8   4   9   1099.49   1347.20    342.04 o
   9   4   9    484.08    404.86    335.05 <
 -12   5   9   1023.53    869.05    251.29 o
 -11   5   9   5278.72   4565.12    282.70 o
 -10   5   9   1887.04   2240.68    219.88 o
  -9   5   9     13.93    240.82    349.02 <
  -8   5   9     49.19    335.05    178.00 <
  -7   5   9   8921.81   8934.79    356.00 o
  -6   5   9   1653.59   1441.43    191.96 o
  -5   5   9   1558.54   1214.57    129.14 o
  -4   5   9  16507.50  15880.20    383.92 o
  -3   5   9    496.19    795.76    129.14 o
  -2   5   9  12847.10  12250.40    338.55 o
  -1   5   9   1996.96   1807.90    167.53 o
   0   5   9   1081.92    837.64    205.92 o
   1   5   9  28453.10  28022.40    642.19 o
   2   5   9     97.23    139.61    160.55 <
   3   5   9   2003.18   1692.72    237.33 o
   4   5   9  14156.00  14152.60    621.25 o
   5   5   9    177.96   -223.37    261.76 <
   6   5   9  10757.60  10023.70    551.44 o
   7   5   9   1383.03    869.05    321.09 <
   8   5   9     63.17    136.12    321.09 <
   9   5   9  11310.10  12292.30    659.64 o
 -11   6   9   8141.40   6987.29    481.64 o
 -10   6   9      2.80     24.43    286.19 <
  -9   6   9   6274.80   5825.07    321.09 o
  -8   6   9   3842.82   3238.86    219.88 o
  -7   6   9   7684.07   7790.02    338.55 o
  -6   6   9    111.10    153.57    171.02 <
  -5   6   9   1250.55   1277.40    188.47 o
  -4   6   9   1621.25   1825.35    198.94 o
  -3   6   9   9263.43   9639.81    362.98 o
  -2   6   9   6027.63   5741.30    293.17 o
  -1   6   9  10305.30   9643.30    401.37 o
   0   6   9   1697.89   1692.72    230.35 o
   1   6   9   2463.69   1811.39    233.84 o
   2   6   9   3110.44   3214.43    261.76 o
   3   6   9     82.05    101.21    191.96 <
   4   6   9  11815.60  10494.90    506.07 o
   5   6   9     66.61    -31.41    380.43 <
   6   6   9   8661.07   8934.79    715.48 o
   7   6   9    360.27    485.13    450.23 <
   8   6   9   1652.75   1162.22    481.64 <
  -8   7   9  13380.10  14142.10    889.99 o
  -7   7   9    275.18    589.84    394.39 <
  -6   7   9   8369.13   8470.60    673.60 o
  -5   7   9   2122.19   2338.40    425.80 o
  -4   7   9   4401.85   3413.37    485.13 o
  -3   7   9   5465.20   5298.05    572.39 o
  -2   7   9  16476.70  17492.70    732.93 o
  -1   7   9   7856.98   8728.88    774.81 o
   0   7   9   2860.23   3116.71    561.91 o
   1   7   9    807.16    352.51    432.78 <
   2   7   9   2219.98   1814.88    492.11 o
   3   7   9  13813.60  15632.40    980.73 o
  -6   8   9    248.11    554.93    387.41 <
  -5   8   9  34365.80  36430.20   1574.06 o
  -4   8   9    683.58   1043.56    425.80 <
  -3   8   9    293.81    614.27    331.57 <
  -2   8   9    946.66   1092.42    554.93 <
  -1   8   9   1789.62   1640.37    589.84 <
   0   8   9  16696.60  17942.90   1172.69 o
   1   8   9    540.76    502.58    547.95 <
   2   8   9   6303.08   6453.29    753.87 o
 -14   0  10  12482.80  12854.20    924.89 o
 -13   0  10  15781.40  16477.00   1015.63 o
 -12   0  10    793.32    673.60    401.37 <
 -11   0  10    442.57    523.52    373.45 <
 -10   0  10  66928.40  71631.90   2610.64 o
  -9   0  10   7933.95   8337.98    617.76 o
  -8   0  10   2506.74   2184.84    373.45 o
  -7   0  10   2490.37   2652.52    369.96 o
  -6   0  10   1119.16   1322.77    303.64 o
  -5   0  10  48523.80  46956.50   1005.16 o
  -4   0  10   4811.38   4652.38    240.82 o
  -3   0  10  48002.80  47326.50   1033.09 o
  -2   0  10  14905.30  13740.70    446.74 o
  -1   0  10   1502.73   1825.35    223.37 o
   0   0  10   5813.60   6051.93    345.52 o
   1   0  10  29508.40  26877.70    757.36 o
   2   0  10  49101.20  49661.40   1978.92 o
   3   0  10  12003.90  11552.40    896.97 o
   4   0  10   1739.24   1661.31    258.27 o
   5   0  10  74515.60  72713.90   2858.44 o
   6   0  10  11705.80  10931.20    872.54 o
   7   0  10   3090.55   1975.43    523.52 o
   8   0  10    127.05    -52.35    446.74 <
   9   0  10   6336.77   6048.44    774.81 o
 -14   1  10     16.14   -390.90    408.35 <
 -13   1  10   3315.62   3490.15    275.72 o
 -12   1  10   4715.75   4868.77    404.86 o
 -11   1  10  10564.30  11060.30    551.44 o
 -10   1  10  14207.80  14944.80    624.74 o
  -9   1  10    935.59    945.83    240.82 o
  -8   1  10     67.15     -3.49    188.47 <
  -7   1  10  53400.40  51884.60   1375.12 o
  -6   1  10  43077.00  43009.20    718.97 o
  -5   1  10   1064.67    998.18    111.68 o
  -4   1  10   7444.25   7458.46    223.37 o
  -3   1  10  16282.90  16159.40    356.00 o
  -2   1  10  74217.40  71066.50   1451.90 o
  -1   1  10  29203.90  28731.00    708.50 o
   0   1  10   4153.73   4017.17    167.53 o
   1   1  10  25799.50  26759.00    876.03 o
   2   1  10  41268.40  42209.90   1783.47 o
   3   1  10   7798.65   7437.52    411.84 o
   4   1  10   1481.02   1553.12    261.76 o
   5   1  10   1581.84   1944.02    286.19 o
   6   1  10  13326.00  13594.20    603.80 o
   7   1  10  13192.90  12770.50    607.29 o
   8   1  10   2444.63   2575.73    352.51 o
   9   1  10    873.82    167.53    303.64 <
  10   1  10    740.04    663.13    369.96 <
 -13   2  10    774.23    907.44    216.39 o
 -12   2  10   1116.43    621.25    282.70 <
 -11   2  10   3364.48   3734.47    356.00 o
 -10   2  10   3226.98   2910.79    324.58 o
  -9   2  10   6236.10   5968.16    328.07 o
  -8   2  10     44.52    -62.82    174.51 <
  -7   2  10      2.22     -6.98    129.14 <
  -6   2  10   7755.68   7538.73    198.94 o
  -5   2  10    490.98    467.68     97.72 o
  -4   2  10     25.25      6.98     97.72 <
  -3   2  10   1537.62   1654.33    146.59 o
  -2   2  10    146.45    198.94    115.18 <
  -1   2  10   2951.08   2938.71    181.49 o
   0   2  10    798.99    830.66    111.68 o
   1   2  10   6526.47   6983.80    328.07 o
   2   2  10   1821.24   1629.90    164.04 o
   3   2  10    734.99    282.70    272.23 <
   4   2  10    681.36    544.46    282.70 <
   5   2  10   3077.71   2453.58    356.00 o
   6   2  10   8453.95   8693.97    415.33 o
   7   2  10    329.02    635.21    226.86 <
   8   2  10    374.87    202.43    251.29 <
   9   2  10   3901.45   3675.13    356.00 o
  10   2  10   1966.92   2861.93    478.15 o
 -13   3  10   6258.46   4638.42    771.32 o
 -12   3  10   3775.18   3839.17    349.02 o
 -11   3  10   1090.12   1022.62    247.80 o
 -10   3  10    409.48    533.99    212.90 <
  -9   3  10    442.71    205.92    181.49 <
  -8   3  10  16189.40  16679.40    516.54 o
  -7   3  10   9796.17   9866.67    359.49 o
  -6   3  10    649.28    586.35    104.71 o
  -5   3  10   7615.01   7577.13    226.86 o
  -4   3  10     52.26    150.08    104.71 <
  -3   3  10   3862.85   3528.55    167.53 o
  -2   3  10   5216.24   5566.80    216.39 o
  -1   3  10   2996.81   3141.14    178.00 o
   0   3  10  29732.50  27551.30    708.50 o
   1   3  10    703.70    680.58    178.00 o
   2   3  10   1844.26   1629.90    244.31 o
   3   3  10   1955.93   1368.14    317.60 o
   4   3  10   1002.60    806.23    300.15 <
   5   3  10   7323.41   7594.58    523.52 o
   6   3  10    165.10     90.74    307.13 <
   7   3  10   4052.51   4914.14    478.15 o
   8   3  10   4492.58   4620.96    359.49 o
   9   3  10     33.28   -310.62    275.72 <
  10   3  10    185.65    520.03    415.33 <
 -13   4  10   6513.81   4694.26    732.93 o
 -12   4  10   5473.37   5189.86    356.00 o
 -11   4  10   1049.92    732.93    450.23 <
 -10   4  10  31153.90  31275.30   1465.86 o
  -9   4  10   1747.71   1347.20    387.41 o
  -8   4  10   2267.76   2184.84    191.96 o
  -7   4  10    262.94     73.29    125.65 <
  -6   4  10    294.43    349.02    164.04 <
  -5   4  10  34953.20  35041.10    687.56 o
  -4   4  10   2141.41   2076.64    167.53 o
  -3   4  10  25925.20  25450.20    554.93 o
  -2   4  10   4150.71   3835.68    205.92 o
  -1   4  10   3667.60   3504.11    209.41 o
   0   4  10      4.97     97.72    118.67 <
   1   4  10   7745.22   8146.02    328.07 o
   2   4  10  19506.00  19475.10    614.27 o
   3   4  10  10679.90  10596.10    443.25 o
   4   4  10   1010.82    917.91    307.13 <
   5   4  10  21480.10  20958.40    848.11 o
   6   4  10   2206.07   2376.79    373.45 o
   7   4  10     47.84    307.13    321.09 <
   8   4  10    422.50    139.61    345.52 <
   9   4  10    250.08    136.12    401.37 <
 -12   5  10     94.23    530.50    422.31 <
 -11   5  10  16327.30  15053.00    530.50 o
 -10   5  10   8175.89   7535.24    387.41 o
  -9   5  10   1413.96    924.89    184.98 o
  -8   5  10      2.47     38.39    181.49 <
  -7   5  10  23154.30  24043.70    652.66 o
  -6   5  10  28262.50  30071.20    753.87 o
  -5   5  10   1480.08   1378.61    205.92 o
  -4   5  10    586.71    621.25    143.10 o
  -3   5  10  15937.30  15583.50    401.37 o
  -2   5  10  49595.30  48589.90    910.93 o
  -1   5  10   4382.11   4355.71    230.35 o
   0   5  10    485.37    617.76    178.00 o
   1   5  10   2967.09   2676.95    233.84 o
   2   5  10  29579.90  30577.20    820.19 o
   3   5  10  12306.40  12372.60    481.64 o
   4   5  10   1763.10   1937.04    335.05 o
   5   5  10    379.15    383.92    279.21 <
   6   5  10   7985.84   7898.22    527.01 o
   7   5  10   8469.47   8599.74    561.91 o
   8   5  10    338.83    -66.31    342.04 <
 -10   6  10   5550.46   3933.40    460.70 o
  -9   6  10  16051.80  15014.60    509.56 o
  -8   6  10    151.88     52.35    240.82 <
  -7   6  10   1590.07   1396.06    223.37 o
  -6   6  10  24037.70  25415.30    673.60 o
  -5   6  10    750.05    900.46    202.43 o
  -4   6  10    122.24    167.53    178.00 <
  -3   6  10    549.39    359.49    184.98 <
  -2   6  10   3397.79   3284.24    261.76 o
  -1   6  10   9962.52   9325.69    527.01 o
   0   6  10    934.64    537.48    226.86 <
   1   6  10  20658.00  22389.30    656.15 o
   2   6  10    190.45    488.62    212.90 <
   3   6  10   1938.95   1581.04    296.66 o
   4   6  10    860.36    656.15    411.84 <
   5   6  10   4150.42   3598.35    547.95 o
   6   6  10  22451.30  23373.60   1193.63 o
   7   6  10     35.80    212.90    446.74 <
  -7   7  10   2626.90   3385.45    513.05 o
  -6   7  10   6579.04   6027.50    614.27 o
  -5   7  10  11600.60  11580.30    802.73 o
  -4   7  10    383.30    457.21    387.41 <
  -3   7  10  17221.10  19977.60   1095.91 o
  -2   7  10   8242.50   8781.23    540.97 o
  -1   7  10   1526.20   2059.19    509.56 o
   0   7  10  17399.10  19321.50   1120.34 o
   1   7  10    973.02    841.13    467.68 <
   2   7  10   4492.60   4673.32    617.76 o
  -5   8  10   1861.48   1793.94    467.68 o
  -4   8  10    496.04    401.37    432.78 <
  -3   8  10   1650.90   1846.29    488.62 o
  -1   8  10   2539.39   2027.78    621.25 o
   0   8  10    728.41    910.93    520.03 <
 -14   1  11    721.38    600.31    471.17 <
 -13   1  11   1662.02   1762.53    359.49 o
 -12   1  11   1567.58   1423.98    324.58 o
 -11   1  11  17760.90  18742.10    743.40 o
 -10   1  11   4833.89   5214.29    397.88 o
  -9   1  11  10160.80  10543.80    516.54 o
  -8   1  11  18827.80  18145.30    684.07 o
  -7   1  11  18008.00  18222.10    547.95 o
  -6   1  11   2359.15   2676.95    219.88 o
  -5   1  11   1491.37   1668.29    153.57 o
  -4   1  11   4789.54   4732.65    191.96 o
  -3   1  11  21133.10  20721.00    436.27 o
  -2   1  11  22427.90  21935.60    495.60 o
  -1   1  11  15928.00  16323.50    589.84 o
   0   1  11    319.84    362.98    178.00 <
   1   1  11   3633.15   3231.88    457.21 o
   2   1  11    633.61    642.19    188.47 o
   3   1  11   2823.43   2167.39    282.70 o
   4   1  11  14558.40  14571.40    610.78 o
   5   1  11     13.12   -282.70    272.23 <
   6   1  11   9022.09   8707.93    506.07 o
   7   1  11   3733.41   3228.39    369.96 o
   8   1  11   1337.15   1102.89    331.57 o
   9   1  11   2001.42   1783.47    408.35 o
 -13   2  11   2262.18   1919.58    467.68 o
 -12   2  11   9050.48  10714.80    579.37 o
 -11   2  11  12155.20  12575.00    600.31 o
 -10   2  11   2645.74   2293.03    317.60 o
  -9   2  11   1271.47   1584.53    272.23 o
  -8   2  11  11583.20  12512.20    554.93 o
  -7   2  11  15159.30  14536.50    366.47 o
  -6   2  11  18184.50  18061.50    366.47 o
  -5   2  11   2953.85   2907.30    153.57 o
  -4   2  11  82467.40  79505.70   1116.85 o
  -3   2  11   4359.44   4418.54    202.43 o
  -2   2  11   1959.87   2045.23    164.04 o
  -1   2  11    370.52    380.43    132.63 <
   0   2  11  16603.30  16780.70    670.11 o
   1   2  11  93166.80  93414.00   2324.44 o
   2   2  11    252.87    230.35    265.25 <
   3   2  11    329.82     -6.98    275.72 <
   4   2  11  26506.70  26532.20   1022.62 o
   5   2  11  18257.60  18682.80    621.25 o
   6   2  11  13208.10  13489.40    520.03 o
   7   2  11    146.75    181.49    237.33 <
   8   2  11    110.66    -59.33    258.27 <
   9   2  11  28875.00  31257.80   1357.67 o
  10   2  11   2894.51   2579.22    478.15 o
 -11   3  11  30497.60  32814.40    876.03 o
 -10   3  11   4998.77   4847.82    331.57 o
  -9   3  11     12.78    -13.96    191.96 <
  -8   3  11  23751.00  23925.00    509.56 o
  -7   3  11  48063.70  48827.30    837.64 o
  -6   3  11  12146.90  12477.30    310.62 o
  -5   3  11     13.11     52.35    111.68 <
  -4   3  11   1835.84   1814.88    188.47 o
  -3   3  11  40041.50  41798.10    820.19 o
  -2   3  11  22107.10  21862.30    471.17 o
  -1   3  11   4784.85   4188.19    205.92 o
   0   3  11    757.47    520.03    212.90 <
   1   3  11   9821.65  10282.00    394.39 o
   2   3  11  11565.40  12623.90    485.13 o
   3   3  11    350.07    178.00    289.68 <
   4   3  11  13962.40  13873.40    718.97 o
   5   3  11     49.23    -34.90    314.11 <
   6   3  11   4762.39   4907.16    481.64 o
   7   3  11    848.52    977.24    261.76 o
   8   3  11   9330.32   9266.36    481.64 o
   9   3  11   5481.85   5821.58    586.35 o
 -12   4  11     15.93   -139.61    446.74 <
 -10   4  11   6823.39   5786.68    610.78 o
  -9   4  11   1634.42   1891.66    237.33 o
  -8   4  11  10322.80   9789.88    335.05 o
  -7   4  11    333.52    439.76    153.57 <
  -6   4  11   1618.17   1570.57    150.08 o
  -5   4  11   1667.65   1800.92    146.59 o
  -4   4  11   7808.07   7674.85    286.19 o
  -3   4  11  27184.20  26294.80    582.86 o
  -2   4  11     68.69    108.19    139.61 <
  -1   4  11   3874.01   3504.11    247.80 o
   0   4  11  24540.90  24361.30    848.11 o
   1   4  11   7563.40   7919.16    394.39 o
   2   4  11  11637.40  11172.00    471.17 o
   3   4  11   1412.85   1207.59    328.07 o
   4   4  11   5984.40   5947.22    506.07 o
   5   4  11  25282.60  26266.90    998.18 o
   6   4  11   2138.87   1717.16    380.43 o
   7   4  11    200.98   -233.84    359.49 <
   8   4  11   5254.20   3922.93    485.13 o
 -11   5  11   1362.43   1336.73    209.41 o
 -10   5  11    103.64     94.23    258.27 <
  -9   5  11  19571.30  18717.70    589.84 o
  -8   5  11    215.00    387.41    205.92 <
  -7   5  11   2801.69   3012.00    265.25 o
  -6   5  11   7556.20   8013.39    362.98 o
  -5   5  11    121.81    -41.88    184.98 <
  -4   5  11  12190.00  12847.30    457.21 o
  -3   5  11    768.78    680.58    195.45 o
  -2   5  11    357.74    261.76    153.57 <
  -1   5  11  12484.90  12965.90    439.76 o
   0   5  11    264.91    -17.45    216.39 <
   1   5  11     66.90    -31.41    233.84 <
   2   5  11   3091.27   3374.98    310.62 o
   3   5  11   2262.66   1643.86    345.52 o
   4   5  11    995.69   1266.93    324.58 o
   5   5  11     66.89    408.35    307.13 <
   6   5  11   3610.64   2676.95    408.35 o
   7   5  11    724.54    959.79    359.49 <
 -10   6  11   2528.70   1343.71    390.90 o
  -9   6  11      7.42   -181.49    356.00 <
  -8   6  11   2124.63   1828.84    300.15 o
  -7   6  11   1087.26   1200.61    279.21 o
  -6   6  11  14355.80  13953.60    589.84 o
  -5   6  11    650.99    701.52    216.39 o
  -4   6  11   4928.92   4774.53    303.64 o
  -3   6  11     33.98   -251.29    198.94 <
  -2   6  11   1655.80   1211.08    230.35 o
  -1   6  11   4850.78   4593.04    349.02 o
   0   6  11     33.78    -90.74    230.35 <
   1   6  11   4840.66   5448.13    356.00 o
   2   6  11   4751.01   3539.02    383.92 o
   3   6  11   5504.16   4942.06    582.86 o
   4   6  11     56.60   -362.98    394.39 <
   5   6  11    326.88     34.90    457.21 <
   6   6  11      4.46    -34.90    429.29 <
  -6   7  11   2903.17   3179.53    533.99 o
  -5   7  11   5900.01   5846.01    645.68 o
  -4   7  11     14.72     38.39    422.31 <
  -3   7  11   9746.83   8411.27    767.83 o
  -2   7  11   3015.72   3305.18    589.84 o
  -1   7  11   1328.02   1539.16    527.01 <
   0   7  11   4503.23   4781.51    638.70 o
  -4   8  11   3535.54   3615.80    600.31 o
 -13   0  12  35252.60  36678.00   1696.21 o
 -12   0  12    135.98    244.31    425.80 <
 -11   0  12    914.97   1001.67    422.31 <
 -10   0  12    950.39    883.01    390.90 <
  -9   0  12  30452.10  31139.20   1420.49 o
  -8   0  12  69023.90  71523.70   1853.27 o
  -7   0  12   2539.30   2813.06    303.64 o
  -6   0  12    865.08   1095.91    237.33 o
  -5   0  12  75286.50  73101.30   1870.72 o
  -4   0  12  35534.30  34772.40   1067.99 o
  -3   0  12  20284.30  20372.00    764.34 o
  -2   0  12     47.55     31.41    275.72 <
  -1   0  12   2364.68   1999.86    373.45 o
   0   0  12 105863.00 105012.00   2478.01 o
   1   0  12  10172.00  10631.00    774.81 o
   2   0  12    808.42    806.23    289.68 <
   3   0  12   6772.33   6303.22    715.48 o
   4   0  12   8808.17   9234.95    858.58 o
   5   0  12  29974.50  29491.80   1577.55 o
   6   0  12     45.35   -366.47    492.11 <
   7   0  12   6926.97   7102.46    806.23 o
   8   0  12  12100.00  13409.20   1074.97 o
 -13   1  12   1060.13    520.03    432.78 <
 -12   1  12  25261.60  26567.10    959.79 o
 -11   1  12  10658.40  11381.40    589.84 o
 -10   1  12   4717.36   4669.83    404.86 o
  -9   1  12   3053.42   3347.06    338.55 o
  -8   1  12  11112.00  11301.10    439.76 o
  -7   1  12   7928.49   8205.35    366.47 o
  -6   1  12     75.49    -87.25    171.02 <
  -5   1  12  14739.60  14208.40    492.11 o
  -4   1  12   3233.94   3200.47    265.25 o
  -3   1  12  13982.80  14026.90    614.27 o
  -2   1  12   9518.96  10589.10    544.46 o
  -1   1  12  10994.20  11234.80    488.62 o
   0   1  12   3153.93   2781.65    181.49 o
   1   1  12    750.21    624.74    136.12 o
   2   1  12    208.65    188.47    174.51 <
   3   1  12  29351.80  29812.90    959.79 o
   4   1  12  14540.00  15269.40    649.17 o
   5   1  12    608.64    781.79    296.66 <
   6   1  12   2547.29   2191.82    338.55 o
   7   1  12   6866.22   6959.37    495.60 o
   8   1  12  16471.30  17778.80   1259.95 o
 -12   2  12   3163.19   3134.16    401.37 o
 -11   2  12    250.27    -52.35    289.68 <
 -10   2  12    758.57    855.09    289.68 <
  -9   2  12   9448.35  10407.60    432.78 o
  -8   2  12   2360.82   2537.34    223.37 o
  -7   2  12   2844.23   2879.38    188.47 o
  -6   2  12   1097.35    998.18    146.59 o
  -5   2  12   3701.35   3378.47    191.96 o
  -4   2  12  20736.90  20099.80    492.11 o
  -3   2  12   1189.54   1200.61    181.49 o
  -2   2  12    275.60    331.57    157.06 <
  -1   2  12   7565.61   7046.62    328.07 o
   0   2  12   3813.19   3224.90    237.33 o
   1   2  12   6933.52   6875.60    321.09 o
   2   2  12     54.15      0.00    310.62 <
   3   2  12     33.63   -160.55    321.09 <
   4   2  12   6885.50   6366.04    411.84 o
   5   2  12   1338.61   1022.62    254.78 o
   6   2  12     34.29    108.19    240.82 <
   7   2  12      0.77    530.50    244.31 <
   8   2  12      8.91    150.08    303.64 <
 -11   3  12   3114.16   2474.52    533.99 o
 -10   3  12  10096.70  10610.10    453.72 o
  -9   3  12    554.41    523.52    188.47 <
  -8   3  12    478.14    610.78    181.49 o
  -7   3  12    528.63    415.33    171.02 <
  -6   3  12   3319.07   3203.96    247.80 o
  -5   3  12   9789.30  10009.80    488.62 o
  -4   3  12    498.44    502.58    226.86 <
  -3   3  12  11180.80  11967.70    540.97 o
  -2   3  12   8055.92   7699.28    317.60 o
  -1   3  12   1267.36   1064.50    191.96 o
   0   3  12      3.60    -52.35    223.37 <
   1   3  12     91.56    108.19    181.49 <
   2   3  12   7018.63   7207.17    540.97 o
   3   3  12   4879.33   4854.80    485.13 o
   4   3  12    219.73     52.35    317.60 <
   5   3  12   6989.64   6777.88    554.93 o
   6   3  12    470.03    558.42    352.51 <
   7   3  12    480.40    652.66    275.72 <
   8   3  12    465.57    792.27    356.00 <
 -11   4  12    348.75   -164.04    303.64 <
 -10   4  12    557.98    237.33    282.70 <
  -9   4  12   7164.58   6809.29    443.25 o
  -8   4  12  22484.30  22413.80    788.78 o
  -7   4  12   5405.80   4886.22    310.62 o
  -6   4  12    955.24    896.97    209.41 o
  -5   4  12  16677.30  16525.90    443.25 o
  -4   4  12   4630.91   4886.22    247.80 o
  -3   4  12   3750.11   3437.80    219.88 o
  -2   4  12   3659.60   3343.57    279.21 o
  -1   4  12     35.64    -24.43    254.78 <
   0   4  12  35883.50  40185.60   1221.55 o
   1   4  12    137.61    171.02    219.88 <
   2   4  12   2136.45   1895.15    380.43 o
   3   4  12    334.60    251.29    317.60 <
   4   4  12   2484.38   2893.34    439.76 o
   5   4  12  12001.30  11629.20    684.07 o
   6   4  12   1659.83   1280.89    383.92 o
   7   4  12   4565.76   4872.26    523.52 o
   8   4  12   6349.51   6739.49    614.27 o
 -10   5  12   1434.67    949.32    293.17 o
  -9   5  12     65.92     -6.98    226.86 <
  -8   5  12  10122.00   9524.63    425.80 o
  -7   5  12  10666.70  11161.50    450.23 o
  -6   5  12   2363.18   2355.85    261.76 o
  -5   5  12   7171.48   7364.23    373.45 o
  -4   5  12   1585.77   1270.42    226.86 o
  -3   5  12   9598.81  10142.40    429.29 o
  -2   5  12    913.46    579.37    216.39 <
  -1   5  12  15273.20  15461.40    666.62 o
   0   5  12   2206.31   1968.45    286.19 o
   1   5  12   4059.80   3308.67    439.76 o
   2   5  12     70.40     -6.98    314.11 <
   3   5  12  14841.70  16058.20    781.79 o
   4   5  12   6453.54   7046.62    533.99 o
   5   5  12     19.28   -335.05    345.52 <
   6   5  12     18.86     24.43    380.43 <
  -9   6  12  14159.50  12271.40    774.81 o
  -8   6  12   3013.49   2771.18    460.70 o
  -7   6  12   6663.07   6313.69    436.27 o
  -6   6  12    373.16    453.72    268.74 <
  -5   6  12   8044.44   8104.14    481.64 o
  -4   6  12  33941.00  35463.50   1095.91 o
  -3   6  12    521.25    544.46    275.72 <
  -2   6  12    868.68    823.68    369.96 <
  -1   6  12  13745.40  14965.80    656.15 o
   0   6  12   6038.80   5668.01    446.74 o
   1   6  12  11916.80  12690.20    914.42 o
   2   6  12      9.22   -101.21    397.88 <
   3   6  12     14.93    575.88    408.35 <
   4   6  12  17409.20  19890.40   1106.38 o
   5   6  12    975.84   1022.62    471.17 <
  -5   7  12   1972.64   2104.56    523.52 o
  -4   7  12      9.50    -83.76    443.25 <
  -3   7  12   1669.11   1612.45    523.52 o
  -2   7  12    944.84    931.87    478.15 <
  -1   7  12   4266.28   3999.72    610.78 o
 -12   1  13   5662.56   5821.58    495.60 o
 -11   1  13   6175.36   5325.98    457.21 o
 -10   1  13    351.08     73.29    237.33 <
  -9   1  13     52.44    191.96    223.37 <
  -8   1  13    760.27    687.56    209.41 o
  -7   1  13   1537.90   1437.94    230.35 o
  -6   1  13  21453.70  22169.50    663.13 o
  -5   1  13   1833.77   1786.96    240.82 o
  -4   1  13   7398.13   6739.49    373.45 o
  -3   1  13   3589.81   3081.81    342.04 o
  -2   1  13   3107.29   3064.36    296.66 o
  -1   1  13  15184.70  16065.20    614.27 o
   0   1  13    768.91    774.81    383.92 <
   1   1  13   6705.64   6969.84    680.58 o
   2   1  13  15506.30  16819.10   1169.20 o
   3   1  13  12000.20  11873.50    558.42 o
   4   1  13     11.06   -191.96    265.25 <
   5   1  13    778.03    408.35    544.46 <
   6   1  13     30.56    115.18    513.05 <
   7   1  13   6569.61   6390.47    872.54 o
 -12   2  13   4599.41   4484.85    596.82 o
 -11   2  13    368.71    715.48    321.09 <
 -10   2  13   5942.71   5434.17    366.47 o
  -9   2  13  61592.40  64738.90   1239.00 o
  -8   2  13    346.67    300.15    184.98 <
  -7   2  13    758.02    903.95    188.47 o
  -6   2  13  11427.00  10289.00    321.09 o
  -5   2  13  12186.40  11660.60    366.47 o
  -4   2  13  31982.40  32552.70    698.03 o
  -3   2  13   1694.27   1636.88    171.02 o
  -2   2  13   2980.11   3643.72    265.25 o
  -1   2  13  34512.10  36849.10   1141.28 o
   0   2  13   6748.14   7140.86    464.19 o
   1   2  13   1127.56   1301.83    293.17 o
   2   2  13   1043.52   1403.04    359.49 o
   3   2  13    814.95    781.79    251.29 o
   4   2  13  16791.80  17866.10    621.25 o
   5   2  13    403.89    404.86    247.80 <
   6   2  13  19928.80  21073.60    691.05 o
 -11   3  13   4941.61   5200.33    457.21 o
 -10   3  13   5623.25   5067.70    369.96 o
  -9   3  13    142.40     -6.98    202.43 <
  -8   3  13   2362.99   2059.19    230.35 o
  -7   3  13    160.08    -17.45    181.49 <
  -6   3  13  30672.20  31219.40    998.18 o
  -5   3  13   7731.74   7294.42    349.02 o
  -4   3  13   1111.64   1064.50    272.23 o
  -3   3  13   2809.80   2610.64    300.15 o
  -2   3  13  21548.10  21890.20    799.24 o
  -1   3  13  29489.90  29100.90    980.73 o
   0   3  13   2408.25   2258.13    331.57 o
   1   3  13      0.67    -10.47    237.33 <
   2   3  13  21590.70  23080.40    973.75 o
   3   3  13  28753.60  29732.60   1134.30 o
   4   3  13   3013.06   3626.27    471.17 o
   5   3  13    775.80   1364.65    397.88 o
   6   3  13   3397.11   3636.74    349.02 o
 -10   4  13  11923.50  10707.80    575.88 o
  -9   4  13   5983.67   5922.79    443.25 o
  -8   4  13  10171.60   9685.18    523.52 o
  -7   4  13    201.27    209.41    230.35 <
  -6   4  13   2250.62   2404.72    275.72 o
  -5   4  13  27458.80  28940.40    795.76 o
  -4   4  13   1425.88   1497.28    247.80 o
  -3   4  13    177.54    174.51    205.92 <
  -2   4  13   2020.35   2146.44    321.09 o
  -1   4  13   1046.79   1186.65    293.17 o
   0   4  13   8491.79   9269.85    404.86 o
   1   4  13    135.05   -115.18    349.02 <
   2   4  13   4404.77   4687.28    516.54 o
   3   4  13   2322.77   2265.11    432.78 o
   4   4  13     30.92   -139.61    373.45 <
   5   4  13    123.00    258.27    366.47 <
   6   4  13   1139.48    907.44    401.37 <
 -10   5  13   2790.02   2348.87    356.00 o
  -9   5  13     97.82   -230.35    279.21 <
  -8   5  13    178.03    -80.27    275.72 <
  -7   5  13   7218.25   7224.62    492.11 o
  -6   5  13    204.28    390.90    233.84 <
  -5   5  13   1075.21   1326.26    251.29 o
  -4   5  13  11129.30  11137.10    467.68 o
  -3   5  13    275.62    -24.43    230.35 <
  -2   5  13   8199.53   7256.03    481.64 o
  -1   5  13   2074.62   2115.03    359.49 o
   0   5  13    500.09    251.29    356.00 <
   1   5  13  15371.20  15004.20    788.78 o
   2   5  13     61.06    -83.76    376.94 <
   3   5  13    885.49    823.68    376.94 <
   4   5  13   8692.23   8714.92    621.25 o
   5   5  13     83.43   -188.47    345.52 <
  -8   6  13   1509.51   1064.50    418.82 <
  -7   6  13   5378.44   4823.39    533.99 o
  -6   6  13     35.86    373.45    349.02 <
  -5   6  13    394.10    150.08    272.23 <
  -4   6  13   1083.09    404.86    296.66 <
  -3   6  13   4487.82   3420.35    394.39 o
  -2   6  13   3363.55   3364.51    516.54 o
  -1   6  13   5640.25   5496.99    684.07 o
   0   6  13    892.23    150.08    446.74 <
   1   6  13    787.62    554.93    450.23 <
   2   6  13   1048.92    757.36    481.64 <
   3   6  13     85.10   -143.10    467.68 <
 -11   0  14    209.21    778.30    467.68 <
 -10   0  14  38209.90  37857.70   1211.08 o
  -9   0  14   4535.06   4135.83    404.86 o
  -8   0  14    909.91    994.69    289.68 o
  -7   0  14    168.85    198.94    258.27 <
  -6   0  14    243.99   1054.03    296.66 o
  -5   0  14  33151.00  32465.40   1071.48 o
  -4   0  14   2235.03   1720.65    324.58 o
  -3   0  14  24885.80  24326.40   1225.04 o
  -2   0  14   5546.56   5629.62    575.88 o
  -1   0  14    177.22     38.39    338.55 <
   0   0  14   1311.16   1218.06    408.35 <
   1   0  14  10694.80  12861.20    910.93 o
   2   0  14  26331.00  27286.00   1539.16 o
   3   0  14   3084.07   2554.79    614.27 o
   4   0  14    491.28    520.03    513.05 <
   5   0  14  27974.50  27889.80   1595.00 o
 -12   1  14   4439.86   5852.99    708.50 o
 -11   1  14   8568.04   9053.46    582.86 o
 -10   1  14  10365.80  11081.20    495.60 o
  -9   1  14   1021.50   1169.20    258.27 o
  -8   1  14    597.62    813.21    240.82 o
  -7   1  14  32146.50  33837.00    903.95 o
  -6   1  14  22150.70  22239.30    691.05 o
  -5   1  14    562.70    464.19    233.84 <
  -4   1  14   3057.41   2293.03    342.04 o
  -3   1  14   5534.49   5657.54    593.33 o
  -2   1  14  37519.70  36894.40   1636.88 o
  -1   1  14  13660.30  16117.50    998.18 o
   0   1  14   2389.82   3511.10    537.48 o
   1   1  14   8909.94   9653.77    813.21 o
   2   1  14  15781.60  17304.20   1218.06 o
   3   1  14   3538.69   3092.28    680.58 o
   4   1  14    459.17    181.49    523.52 <
   5   1  14    914.87    844.62    575.88 <
 -11   2  14    780.17    659.64    457.21 <
 -10   2  14   1208.88    984.22    230.35 o
  -9   2  14   3804.87   3608.82    282.70 o
  -8   2  14    287.06    237.33    195.45 <
  -7   2  14    614.35    677.09    205.92 o
  -6   2  14   2564.75   2516.40    247.80 o
  -5   2  14     83.19     24.43    209.41 <
  -4   2  14     16.70     94.23    223.37 <
  -3   2  14    558.72    631.72    219.88 <
  -2   2  14   2111.19   2572.24    324.58 o
  -1   2  14    535.32    537.48    265.25 <
   0   2  14    304.14    132.63    268.74 <
   1   2  14   5313.42   5325.98    460.70 o
   2   2  14    575.44    457.21    244.31 <
   3   2  14   1471.97   1654.33    422.31 o
   4   2  14    825.50   1183.16    397.88 <
   5   2  14    914.33    771.32    401.37 <
 -10   3  14    215.33     45.37    296.66 <
  -9   3  14    310.90     62.82    212.90 <
  -8   3  14   9877.35  10365.80    411.84 o
  -7   3  14   4394.92   4345.24    331.57 o
  -6   3  14    240.28    394.39    226.86 <
  -5   3  14   4333.76   4296.38    390.90 o
  -4   3  14     33.78   -247.80    275.72 <
  -3   3  14   1798.26   1898.64    314.11 o
  -2   3  14   1376.60    848.11    286.19 <
  -1   3  14   1453.15   1190.14    303.64 o
   0   3  14  13771.70  14407.40    687.56 o
   1   3  14    772.45   1207.59    300.15 o
   2   3  14   1082.75    488.62    401.37 <
   3   3  14   1402.60   1019.13    394.39 <
   4   3  14    600.59    390.90    373.45 <
   5   3  14   3035.83   2840.99    471.17 o
  -9   4  14   1310.80   1151.75    328.07 o
  -8   4  14   2074.77   1811.39    335.05 o
  -7   4  14    392.60    286.19    275.72 <
  -6   4  14    860.18   1221.55    272.23 o
  -5   4  14  15450.30  16330.40    586.35 o
  -4   4  14   1715.94   1588.02    268.74 o
  -3   4  14  12444.70  12910.10    520.03 o
  -2   4  14   2705.94   2244.17    338.55 o
  -1   4  14   2937.96   3078.32    387.41 o
   0   4  14     99.35     27.92    272.23 <
   1   4  14   4541.56   3874.07    506.07 o
   2   4  14   7812.62   9343.14    677.09 o
   3   4  14   5154.35   5863.46    582.86 o
   4   4  14    302.39    198.94    373.45 <
  -9   5  14    497.12     52.35    307.13 <
  -8   5  14    106.23     76.78    296.66 <
  -7   5  14  12894.80  12972.90    635.21 o
  -6   5  14  15577.90  17014.50    603.80 o
  -5   5  14    927.87    910.93    261.76 o
  -4   5  14    283.01    502.58    244.31 <
  -3   5  14   8734.52   8882.44    450.23 o
  -2   5  14  24251.10  27439.60    980.73 o
  -1   5  14   2702.70   2847.97    383.92 o
   0   5  14    463.38    303.64    397.88 <
   1   5  14   1592.82   1608.96    425.80 o
   2   5  14  15139.90  14812.20    823.68 o
   3   5  14   5579.82   5685.46    551.44 o
   4   5  14   1073.55    698.03    383.92 <
  -7   6  14   1764.21   1982.41    446.74 o
  -6   6  14   9549.41   9678.20    722.46 o
  -5   6  14    125.86    349.02    387.41 <
  -4   6  14    281.64   -129.14    397.88 <
  -3   6  14   1044.23    862.07    429.29 <
  -2   6  14   3017.12   2771.18    397.88 o
  -1   6  14   3515.84   2505.93    610.78 o
   0   6  14   1058.19    520.03    502.58 <
   1   6  14  12090.90  12770.50    966.77 o
 -11   1  15   8798.49   7968.02    799.24 o
 -10   1  15   2639.67   2844.48    408.35 o
  -9   1  15   6457.73   6310.20    411.84 o
  -8   1  15   8146.18   7559.67    429.29 o
  -7   1  15   8991.69   9451.34    467.68 o
  -6   1  15    305.25    178.00    244.31 <
  -5   1  15    619.21    715.48    317.60 <
  -4   1  15   1580.83   1423.98    345.52 o
  -3   1  15   6284.88   5947.22    631.72 o
  -2   1  15   8782.96  10316.90    816.70 o
  -1   1  15   7084.21   6669.69    691.05 o
   0   1  15     28.24     90.74    411.84 <
   1   1  15   1168.77    533.99    436.27 <
   2   1  15    180.71   1067.99    586.35 <
   3   1  15    257.96    -62.82    579.37 <
   4   1  15   6741.05   6812.78    896.97 o
 -10   2  15   1332.76   1497.28    530.50 <
  -9   2  15    785.04    607.29    233.84 <
  -8   2  15   7877.35   8596.25    394.39 o
  -7   2  15   7955.19   8156.49    383.92 o
  -6   2  15   9105.36   9807.33    460.70 o
  -5   2  15   1436.82   1535.67    282.70 o
  -4   2  15  38629.30  40841.80   1235.51 o
  -3   2  15   2268.47   2792.12    362.98 o
  -2   2  15   1308.13   1333.24    317.60 o
  -1   2  15    147.33   -265.25    300.15 <
   0   2  15   7601.14   7873.79    544.46 o
   1   2  15  40116.80  46960.00   1193.63 o
   2   2  15     14.70     -6.98    387.41 <
   3   2  15    123.87     20.94    380.43 <
   4   2  15   9037.63   7803.99    645.68 o
  -9   3  15     42.60   -157.06    321.09 <
  -8   3  15  11923.30  10843.90    607.29 o
  -7   3  15  21306.10  22427.70    715.48 o
  -6   3  15   6435.94   6177.57    401.37 o
  -5   3  15    124.79     62.82    293.17 <
  -4   3  15     69.28    226.86    289.68 <
  -3   3  15  16713.90  16923.80    736.42 o
  -2   3  15  10858.30  11220.80    610.78 o
  -1   3  15   2692.46   2603.66    380.43 o
   0   3  15    318.59   -265.25    321.09 <
   1   3  15   1878.01   1546.14    429.29 o
   2   3  15   3457.45   3277.25    513.05 o
   3   3  15    198.07   -171.02    408.35 <
  -8   4  15   7323.38   7315.36    520.03 o
  -7   4  15     64.93    558.42    324.58 <
  -6   4  15   1839.70   1828.84    303.64 o
  -5   4  15   1349.51    987.71    272.23 o
  -4   4  15   5120.00   5123.55    373.45 o
  -3   4  15  14896.00  15922.10    725.95 o
  -2   4  15     83.42     87.25    307.13 <
  -1   4  15   2463.48   1832.33    380.43 o
   0   4  15  14485.30  15203.10    670.11 o
   1   4  15   4335.88   3765.88    540.97 o
   2   4  15   5778.11   5971.65    600.31 o
   3   4  15   1155.07    945.83    422.31 <
  -7   5  15   1744.83   1734.61    356.00 o
  -6   5  15   3262.27   4111.40    411.84 o
  -5   5  15     60.79     41.88    293.17 <
  -4   5  15   6128.22   7088.50    513.05 o
  -3   5  15     62.03   -212.90    335.05 <
  -2   5  15    344.54    296.66    335.05 <
  -1   5  15   6022.33   5636.60    439.76 o
   0   5  15    168.04   -624.74    457.21 <
   1   5  15     34.33    -34.90    418.82 <
   2   5  15    540.74    715.48    422.31 <
  -4   6  15   2645.50   2889.85    523.52 o
  -3   6  15     29.21   -317.60    446.74 <
  -9   0  16  16370.50  16128.00   1106.38 o
  -8   0  16  33497.90  35802.00   1214.57 o
  -7   0  16    127.99    195.45    324.58 <
  -6   0  16    786.14    610.78    338.55 <
  -5   0  16  29173.40  31551.00   1528.69 o
  -4   0  16  14436.30  14606.30    970.26 o
  -3   0  16  10357.90  10861.40    841.13 o
  -2   0  16     48.92     87.25    408.35 <
  -1   0  16   1130.99    537.48    446.74 <
   0   0  16  39543.00  43553.60   1964.96 o
   1   0  16   2015.98   2345.38    429.29 o
   2   0  16    386.19    -62.82    533.99 <
 -10   1  16   2589.12   3427.33    642.19 o
  -9   1  16   1014.81    394.39    492.11 <
  -8   1  16   4677.27   3853.13    369.96 o
  -7   1  16   1896.79   1724.14    310.62 o
  -6   1  16     54.10    -76.78    324.58 <
  -5   1  16   8278.69   8076.22    572.39 o
  -4   1  16    210.11    642.19    450.23 <
  -3   1  16   5048.56   4725.67    631.72 o
  -2   1  16   6511.60   5018.84    649.17 o
  -1   1  16   6440.65   5961.18    722.46 o
   0   1  16   2343.70   2837.50    610.78 o
   1   1  16     22.63   -240.82    366.47 <
   2   1  16     21.66   -589.84    684.07 <
 -10   2  16   1148.48    889.99    544.46 <
  -9   2  16   4373.49   3696.07    687.56 o
  -8   2  16   1053.62    987.71    296.66 o
  -7   2  16   2799.29   2676.95    331.57 o
  -6   2  16    692.34    481.64    268.74 <
  -5   2  16   3135.80   3720.50    359.49 o
  -4   2  16   7268.18   6865.13    502.58 o
  -3   2  16    137.78     90.74    310.62 <
  -2   2  16    919.99    638.70    324.58 <
  -1   2  16   3198.71   3305.18    425.80 o
   0   2  16   1665.25    935.36    349.02 <
   1   2  16   2192.67   1245.99    432.78 <
   2   2  16      5.86   -732.93    450.23 <
  -7   3  16    262.08    715.48    345.52 <
  -6   3  16   1795.81   2006.84    324.58 o
  -5   3  16   5844.86   6072.87    415.33 o
  -4   3  16    182.18    -41.88    314.11 <
  -3   3  16   4479.17   3895.01    443.25 o
  -2   3  16   3255.10   2875.89    415.33 o
  -1   3  16    189.15   -167.53    349.02 <
   0   3  16    236.54    -94.23    345.52 <
   1   3  16    125.53    425.80    429.29 <
  -6   4  16    790.91   1333.24    359.49 o
  -5   4  16   9352.78   9022.05    568.90 o
  -4   4  16   3012.18   3155.10    418.82 o
  -3   4  16   1903.20   1403.04    362.98 o
  -2   4  16   2385.89   2383.78    408.35 o
  -1   4  16     31.08   -429.29    376.94 <
   0   4  16  15073.10  15259.00    876.03 o
  -5   5  16   4638.15   4879.24    684.07 o
  -4   5  16    495.05   -101.21    345.52 <
  -3   5  16   3671.64   3765.88    453.72 o
  -2   5  16    495.68     -6.98    376.94 <
  -1   5  16   8680.76   7011.72    656.15 o
  -8   1  17     52.83   -321.09    572.39 <
  -6   1  17  13971.30  14149.10    746.89 o
  -5   1  17   1540.15   2268.60    551.44 o
  -4   1  17   2870.27   3249.33    607.29 o
  -3   1  17   2937.45   2907.30    586.35 o
  -2   1  17   2012.34   1019.13    502.58 <
  -1   1  17   6183.92   6900.03    792.27 o
   0   1  17    874.93   1305.32    554.93 <
  -5   2  17   5298.99   5636.60    488.62 o
  -4   2  17  12217.20  15328.80    729.44 o
  -3   2  17   2215.84   2031.27    380.43 o
  -2   2  17   2234.51   2380.29    404.86 o
  -1   2  17  12735.00  12965.90    708.50 o
  -3   3  17   1305.02    949.32    530.50 <

loop_
 _twin_refln_datum_id
 _twin_refln_individual_id
 _twin_refln_index_h
 _twin_refln_index_k
 _twin_refln_index_l
 _twin_refln_F_squared_calc
 _twin_refln_F_squared_meas
 _twin_refln_F_squared_sigma
 _twin_refln_include_status
 ? ? ? ? ? ? ? ? ?
