# Supplementary material
Source: MDPI journal article supplement (https://www.mdpi.com/2073-8994/15/4/918)
Supplement: s1 [file s1 › BaBi19Eu01B4O10.cif]

#=======================================================================
data_global
#=======================================================================

_audit_creation_method                   'Jana2006 Version : 25/10/2015'


# 1. PROCESSING SUMMARY (IUCr Office Use Only)

_journal_date_recd_electronic            ?
_journal_date_to_coeditor                ?
_journal_date_from_coeditor              ?
_journal_date_accepted                   ?
_journal_date_printers_first             ?
_journal_date_printers_final             ?
_journal_date_proofs_out                 ?
_journal_date_proofs_in                  ?
_journal_coeditor_name                   ?
_journal_coeditor_code                   ?
_journal_coeditor_notes
; ?
;
_journal_techeditor_code                 ?
_journal_paper_category                  ?
_journal_techeditor_notes
; ?
;
_journal_coden_ASTM                      ?
_journal_name_full                       'Acta Crystallographica Section C'
_journal_year                            ?
_journal_volume                          ?
_journal_issue                           ?
_journal_page_first                      ?
_journal_page_last                       ?
_journal_suppl_publ_number               ?
_journal_suppl_publ_pages                ?

#=======================================================================

# 2. SUBMISSION DETAILS

_publ_contact_author_name                ?
_publ_contact_author_address
; ?
;
_publ_contact_author_email               ?
_publ_contact_author_fax                 ?
_publ_contact_author_phone               ?

_publ_requested_journal                  'Acta Crystallographica Section C'
_publ_requested_category                 ?

_publ_contact_letter
; ?
;

#=======================================================================

# 3. TITLE AND AUTHOR LIST

_publ_section_title
; ?
;
_publ_section_title_footnote
; ?
;
loop_
 _publ_author_name
 _publ_author_footnote
 _publ_author_address
; ?      # name
;
; ?      # footnote
;
; ?      # address
;

#=======================================================================

# 4. TEXT

_publ_section_synopsis
; ?
;
_publ_section_abstract
; ?
;
_publ_section_comment
; ?
;
_publ_section_introduction
; ?
;
_publ_section_experimental
; ?
;
_publ_section_exptl_prep
; ?
;
_publ_section_exptl_refinement
; ?
;
_publ_section_exptl_solution
; ?
;
_publ_section_discussion
; ?
;
_publ_section_acknowledgements
; ?
;
_publ_section_references
;
Petricek, V., Dusek, M. & Palatinus L. (2014). Z. Kristallogr. 229(5), 345-352.

Palatinus L. & Chapuis G. (2007). J. Appl. Cryst. 40, 786-790.

# enable this reference if Diamond ver. 2 was used for visualization
#Brandenburg, K. (1999). DIAMOND. Version. 2.1c.
#Crystal Impact GbR, Bonn, Germany.

# enable this reference if Diamond ver. 3 was used for visualization
#Brandenburg, K. & Putz, H. (2005). DIAMOND Version 3.
#Crystal Impact GbR, Postfach 1251, D-53002 Bonn, Germany.

# enable this reference if SIR97 was used for solving of the structure
#Altomare, A., Burla, M. C., Camalli, M., Cascarano, G., Giacovazzo, C.,
#Guagliardi, A., Moliterni, A. G. G., Polidori, G., Spagna, R. (1997).
#SIR97. A Package for Crystal Structure Solution by Direct Methods
#and Refinement, Bari, Rome, Italy.

# use this reference if SIR2002 was used for solving of the structure
#Burla, M.C., Camalli, M., Carrozzini, B., Cascarano, G., Giacovazzo, C.,
#Polidori, G., Spagna, R.
#SIR2002: the program, J. Appl. Cryst, (2003). 36, 1103


# use this reference if SIR2011 was used for solving of the structure
#Burla, M.C., Caliandro, R., Camalli, M., Carrozzini, B., Cascarano,
#G.L., Giacovazzo, C., Mallamo. M., Mazzone, A., Polidori, G., Spagna, R.
#SIR2011: a new package for crystal structure determination and refinement,
#J.Appl.Cryst. (2012) 45, 357-361

# enable this reference if bond valences were calculated
#Brown, I. D. (1996). J. Appl. Cryst. 29, 479-480.

# enable this reference if Xshape wase used for crystal shape refinement
#Stoe & Cie (1998). X-SHAPE. Stoe & Cie, Darmstadt, Germany.


# enable this reference if Flack coefficient was refined
#Flack, H. D. (1983). Acta Cryst. A39, 876-881.
;
_publ_section_figure_captions
; ?
;
_publ_section_table_legends
; ?
;

#=======================================================================
data_I
#=======================================================================

# 5. CHEMICAL DATA

_chemical_name_systematic
; ?
;
_chemical_name_common                    ?
_chemical_formula_moiety                 ?
_chemical_formula_structural             ?
_chemical_formula_analytical             ?
_chemical_formula_iupac                  ?
_chemical_formula_sum                    'B4 Ba1 Bi1.942 Eu0.058 O10'
_chemical_formula_weight                 755.2
_chemical_melting_point                  ?
_chemical_compound_source                ?
_chemical_absolute_configuration         .

#=======================================================================

# 6. CRYSTAL DATA

_symmetry_cell_setting                   monoclinic
_symmetry_space_group_name_H-M           'P 1 21/c 1'
_symmetry_space_group_name_Hall          '-P 2ycb'
_symmetry_Int_Tables_number              14

loop_
 _space_group_symop_id
 _space_group_symop_operation_xyz
 1   x,y,z
 2   -x,y+1/2,-z+1/2
 3   -x,-y,-z
 4   x,-y+1/2,z+1/2

_cell_length_a                           10.1862(16)
_cell_length_b                           6.3819(9)
_cell_length_c                           12.4466(18)
_cell_angle_alpha                        90
_cell_angle_beta                         102.701(12)
_cell_angle_gamma                        90
_cell_volume                             789.3(2)

loop_
 _twin_individual_id
 _twin_individual_mass_fraction_refined
 _twin_individual_twin_matrix_11
 _twin_individual_twin_matrix_12
 _twin_individual_twin_matrix_13
 _twin_individual_twin_matrix_21
 _twin_individual_twin_matrix_22
 _twin_individual_twin_matrix_23
 _twin_individual_twin_matrix_31
 _twin_individual_twin_matrix_32
 _twin_individual_twin_matrix_33
 ? ? ? ? ? ? ? ? ? ? ?

_cell_formula_units_Z                    4

_cell_measurement_reflns_used            3955
_cell_measurement_theta_min              3.36
_cell_measurement_theta_max              33.44
_cell_measurement_temperature            293
_cell_special_details
; ?
;

_exptl_crystal_density_diffrn            6.3552
_exptl_crystal_density_meas              ?
_exptl_crystal_density_method            ?
_exptl_crystal_F_000                     1283

_exptl_absorpt_coefficient_mu            48.626
_exptl_crystal_description               prizm
_exptl_crystal_size_max                  0.1
_exptl_crystal_size_mid                  0.05
_exptl_crystal_size_min                  0.04
_exptl_crystal_size_rad                  ?
_exptl_crystal_colour                    yellow
_exptl_absorpt_correction_type           'multi-scan'
_exptl_absorpt_process_details
;
CrysAlisPro 1.171.41.104a (Rigaku Oxford Diffraction, 2021)
Empirical absorption correction using spherical harmonics,
implemented in SCALE3 ABSPACK scaling algorithm.
;
_exptl_absorpt_correction_T_min          0.543
_exptl_absorpt_correction_T_max          1
loop_
 _exptl_crystal_face_index_h
 _exptl_crystal_face_index_k
 _exptl_crystal_face_index_l
 _exptl_crystal_face_perp_dist
 ? ? ? ?

#=======================================================================

# 7. EXPERIMENTAL DATA

_exptl_special_details                   ?

_diffrn_ambient_temperature              293
_diffrn_source                           'micro-focus sealed X-ray tube'
_diffrn_source_power                     ?
_diffrn_source_voltage                   ?
_diffrn_source_current                   ?
_diffrn_radiation_type                   'Mo K\a'
_diffrn_radiation_source                 'X-ray tube'
_diffrn_radiation_wavelength             0.71073
_diffrn_radiation_monochromator          'mirror'
_diffrn_measurement_device               'four-circle diffractometer'
_diffrn_measurement_device_type          'XtaLAB Synergy, Single source at home/near, HyPix'
_diffrn_detector                         'Hybrid Pixel Array Detector'
_diffrn_detector_area_resol_mean         10.0000
_diffrn_measurement_method               '\w scans'
_diffrn_measurement_specimen_support     ?

_diffrn_reflns_number                    8837
_diffrn_reflns_theta_min                 3.36
_diffrn_reflns_theta_max                 33.48
_diffrn_reflns_theta_full                31.43
_diffrn_measured_fraction_theta_max      0.88
_diffrn_measured_fraction_theta_full     0.98
_diffrn_reflns_av_R_equivalents          0.0448
_diffrn_reflns_av_unetI/netI             0.0512
_diffrn_reflns_limit_h_min               -13
_diffrn_reflns_limit_h_max               14
_diffrn_reflns_limit_k_min               -8
_diffrn_reflns_limit_k_max               9
_diffrn_reflns_limit_l_min               -19
_diffrn_reflns_limit_l_max               17
_diffrn_reflns_reduction_process         ?

_diffrn_standards_number                 ?
_diffrn_standards_interval_count         ?
_diffrn_standards_interval_time          ?
_diffrn_standards_decay_%                ?
loop_
_diffrn_standard_refln_index_h
_diffrn_standard_refln_index_k
_diffrn_standard_refln_index_l
  ? ? ?

_diffrn_radiation_probe                  X-ray

#=======================================================================

# 8. REFINEMENT DATA

_refine_special_details
; ?
;

_reflns_number_total                     2701
_reflns_number_gt                        1954
_reflns_threshold_expression             'I>3\s(I)'

_refine_ls_structure_factor_coef         F
_refine_ls_R_factor_gt                   0.0317
_refine_ls_wR_factor_gt                  0.0305
_refine_ls_R_factor_all                  0.0551
_refine_ls_wR_factor_ref                 0.0329
_refine_ls_goodness_of_fit_ref           1.13
_refine_ls_goodness_of_fit_gt            1.25
_refine_ls_restrained_S_gt               ?
_refine_ls_restrained_S_all              ?
_refine_ls_number_reflns                 2701
_refine_ls_number_parameters             150
_refine_ls_number_restraints             0
_refine_ls_number_constraints            9
_refine_ls_weighting_scheme              sigma
_refine_ls_weighting_details             'w=1/(\s^2^(F)+0.0001F^2^)'
_refine_ls_hydrogen_treatment            ?
_refine_ls_shift/su_max                  0.0381
_refine_ls_shift/su_mean                 0.0056
_refine_diff_density_max                 ?
_refine_diff_density_min                 ?
_refine_ls_extinction_method             'none'
_refine_ls_extinction_coef               ?
_refine_ls_abs_structure_details         ?
_refine_ls_abs_structure_Flack           ?
_refine_ls_abs_structure_Rogers          ?

loop_
 _atom_type_symbol
 _atom_type_scat_dispersion_real
 _atom_type_scat_dispersion_imag
 _atom_type_scat_source
 B    0.0013  0.0007
 'International Tables Vol C tables 4.2.6.8 and 6.1.1.1'
 Ba  -0.3244  2.2819
 'International Tables Vol C tables 4.2.6.8 and 6.1.1.1'
 Bi  -4.1077 10.2566
 'International Tables Vol C tables 4.2.6.8 and 6.1.1.1'
 Eu  -0.1578  3.6682
 'International Tables Vol C tables 4.2.6.8 and 6.1.1.1'
 O    0.0106  0.0060
 'International Tables Vol C tables 4.2.6.8 and 6.1.1.1'

_computing_data_collection
 'CrysAlisPro 1.171.41.104a (Rigaku OD, 2021)'
_computing_cell_refinement
 'CrysAlisPro 1.171.41.104a (Rigaku OD, 2021)'
_computing_data_reduction
 'CrysAlisPro 1.171.41.104a (Rigaku OD, 2021)'
_computing_structure_solution            ?
_computing_structure_refinement          ?
_computing_molecular_graphics            ?
_computing_publication_material          ?

loop_
 _restr_distance_atom_site_label_1
 _restr_distance_site_symmetry_1
 _restr_distance_atom_site_label_2
 _restr_distance_site_symmetry_2
 _restr_distance_target
 _restr_distance_target_weight_param
 ? ? ? ? ? ?

loop_
 _restr_angle_atom_site_label_1
 _restr_angle_site_symmetry_1
 _restr_angle_atom_site_label_2
 _restr_angle_site_symmetry_2
 _restr_angle_atom_site_label_3
 _restr_angle_site_symmetry_3
 _restr_angle_target
 _restr_angle_target_weight_param
 ? ? ? ? ? ? ? ?

loop_
 _restr_torsion_atom_site_label_1
 _restr_torsion_site_symmetry_1
 _restr_torsion_atom_site_label_2
 _restr_torsion_site_symmetry_2
 _restr_torsion_atom_site_label_3
 _restr_torsion_site_symmetry_3
 _restr_torsion_atom_site_label_4
 _restr_torsion_site_symmetry_4
 _restr_torsion_angle_target
 _restr_torsion_weight_param
 ? ? ? ? ? ? ? ? ? ?

loop_
 _restr_equal_distance_atom_site_label_1
 _restr_equal_distance_site_symmetry_1
 _restr_equal_distance_atom_site_label_2
 _restr_equal_distance_site_symmetry_2
 _restr_equal_distance_class_class_id
 _restr_equal_distance_class_target_weight_param
 ? ? ? ? ? ?

loop_
 _restr_equal_angle_atom_site_label_1
 _restr_equal_angle_site_symmetry_1
 _restr_equal_angle_atom_site_label_2
 _restr_equal_angle_site_symmetry_2
 _restr_equal_angle_atom_site_label_3
 _restr_equal_angle_site_symmetry_3
 _restr_equal_angle_class_class_id
 _restr_equal_angle_class_target_weight_param
 ? ? ? ? ? ? ? ?

loop_
 _restr_equal_torsion_atom_site_label_1
 _restr_equal_torsion_site_symmetry_1
 _restr_equal_torsion_atom_site_label_2
 _restr_equal_torsion_site_symmetry_2
 _restr_equal_torsion_atom_site_label_3
 _restr_equal_torsion_site_symmetry_3
 _restr_equal_torsion_atom_site_label_4
 _restr_equal_torsion_site_symmetry_4
 _restr_equal_torsion_class_class_id
 _restr_equal_torsion_class_target_weight_param
 ? ? ? ? ? ? ? ? ? ?


#=======================================================================

# 9. ATOMIC COORDINATES AND DISPLACEMENT PARAMETERS

loop_
 _atom_site_label
 _atom_site_type_symbol
 _atom_site_fract_x
 _atom_site_fract_y
 _atom_site_fract_z
 _atom_site_adp_type
 _atom_site_U_iso_or_equiv
 _atom_site_site_symmetry_multiplicity
 _atom_site_occupancy
 _atom_site_calc_flag
 _atom_site_refinement_flags
 _atom_site_disorder_assembly
 _atom_site_disorder_group
  Bi1 Bi 0.48415(3) 0.17456(4) 0.11871(3) Uani 0.01290(10) 4 0.940(7) d . . .
  Eu1' Eu 0.48415(3) 0.17456(4) 0.11871(3) Uani 0.01290(10) 4 0.060(7) d . . .
  Bi2 Bi 0.72879(3) 0.14693(4) 0.37317(3) Uani 0.01319(10) 4 1 d . . .
  Ba1 Ba 0.12785(5) 0.09550(7) -0.12427(4) Uani 0.01203(14) 4 1 d . . .
  O1 O 0.3122(5) 0.4391(8) -0.1097(5) Uani 0.0132(17) 4 1 d . . .
  O2 O 0.7105(6) -0.2129(8) 0.2754(5) Uani 0.0168(18) 4 1 d . . .
  O3 O 0.5609(6) -0.1293(7) 0.0939(5) Uani 0.0139(18) 4 1 d . . .
  O4 O -0.1337(5) -0.0058(8) -0.2301(5) Uani 0.0123(17) 4 1 d . . .
  O5 O 0.7277(5) 0.4983(8) 0.4062(5) Uani 0.0118(17) 4 1 d . . .
  O6 O 0.4952(6) 0.0894(8) 0.2908(5) Uani 0.0144(18) 4 1 d . . .
  O7 O 0.1263(5) -0.3341(8) -0.1006(5) Uani 0.0117(17) 4 1 d . . .
  O8 O 0.7139(6) 0.2235(8) 0.2033(5) Uani 0.0133(17) 4 1 d . . .
  O9 O 0.9446(5) 0.0818(8) 0.3643(5) Uani 0.0145(18) 4 1 d . . .
  O10 O 0.0893(5) 0.2326(8) 0.0762(5) Uani 0.0140(17) 4 1 d . . .
  B1 B -0.1951(9) -0.1289(13) -0.1571(8) Uani 0.012(3) 4 1 d . . .
  B2 B 0.0055(9) 0.3878(13) 0.1055(7) Uiso 0.0088(16) 4 1 d . . .
  B3 B 0.3887(10) 0.1971(15) 0.3310(9) Uani 0.019(3) 4 1 d . . .
  B4 B 0.2146(9) 0.5869(13) -0.1715(7) Uani 0.011(2) 4 1 d . . .

loop_
 _atom_site_aniso_label
 _atom_site_aniso_type_symbol
 _atom_site_aniso_U_11
 _atom_site_aniso_U_22
 _atom_site_aniso_U_33
 _atom_site_aniso_U_12
 _atom_site_aniso_U_13
 _atom_site_aniso_U_23
 Bi1 Bi 0.01373(18) 0.01207(17) 0.01409(17) 0.00120(11) 0.00566(12) -0.00055(11)
 Eu1' Eu 0.01373(18) 0.01207(17) 0.01409(17) 0.00120(11) 0.00566(12) -0.00055(11)
 Bi2 Bi 0.01276(16) 0.01228(15) 0.01521(16) -0.00061(11) 0.00459(12) 0.00015(11)
 Ba1 Ba 0.0138(2) 0.0104(2) 0.0130(2) -0.00098(16) 0.00535(18) -0.00050(16)
 O1 O 0.013(3) 0.018(3) 0.010(3) 0.002(2) 0.006(2) 0.002(2)
 O2 O 0.015(3) 0.009(3) 0.026(3) 0.003(2) 0.002(3) 0.005(2)
 O3 O 0.021(3) 0.005(2) 0.017(3) 0.007(2) 0.007(3) 0.003(2)
 O4 O 0.013(3) 0.010(3) 0.012(3) -0.004(2) 0.001(2) 0.003(2)
 O5 O 0.013(3) 0.009(3) 0.015(3) -0.003(2) 0.006(2) -0.002(2)
 O6 O 0.012(3) 0.020(3) 0.015(3) 0.001(2) 0.010(2) -0.003(2)
 O7 O 0.003(3) 0.015(3) 0.018(3) -0.0020(19) 0.004(2) 0.000(2)
 O8 O 0.015(3) 0.010(3) 0.016(3) -0.001(2) 0.005(2) 0.002(2)
 O9 O 0.008(3) 0.017(3) 0.020(3) 0.001(2) 0.006(2) 0.005(2)
 O10 O 0.014(3) 0.016(3) 0.013(3) 0.004(2) 0.006(2) 0.002(2)
 B1 B 0.011(4) 0.011(4) 0.013(4) -0.001(3) 0.003(4) -0.002(3)
 B3 B 0.014(5) 0.016(5) 0.030(6) -0.010(4) 0.011(4) -0.010(4)
 B4 B 0.008(4) 0.017(4) 0.005(4) 0.006(3) -0.001(3) 0.001(3)

loop_
 _jana_atom_site_ADP_C_label
 _jana_atom_site_ADP_C_type_symbol
 _jana_atom_site_ADP_C_111
 _jana_atom_site_ADP_C_112
 _jana_atom_site_ADP_C_113
 _jana_atom_site_ADP_C_122
 _jana_atom_site_ADP_C_123
 _jana_atom_site_ADP_C_133
 _jana_atom_site_ADP_C_222
 _jana_atom_site_ADP_C_223
 _jana_atom_site_ADP_C_233
 _jana_atom_site_ADP_C_333
 ? ? ? ? ? ? ? ? ? ? ? ?

loop_
 _jana_atom_site_ADP_D_label
 _jana_atom_site_ADP_D_type_symbol
 _jana_atom_site_ADP_D_1111
 _jana_atom_site_ADP_D_1112
 _jana_atom_site_ADP_D_1113
 _jana_atom_site_ADP_D_1122
 _jana_atom_site_ADP_D_1123
 _jana_atom_site_ADP_D_1133
 _jana_atom_site_ADP_D_1222
 _jana_atom_site_ADP_D_1223
 _jana_atom_site_ADP_D_1233
 _jana_atom_site_ADP_D_1333
 _jana_atom_site_ADP_D_2222
 _jana_atom_site_ADP_D_2223
 _jana_atom_site_ADP_D_2233
 _jana_atom_site_ADP_D_2333
 _jana_atom_site_ADP_D_3333
 ? ? ? ? ? ? ? ? ? ? ? ? ? ? ? ? ?

loop_
 _jana_atom_site_ADP_E_label
 _jana_atom_site_ADP_E_type_symbol
 _jana_atom_site_ADP_E_11111
 _jana_atom_site_ADP_E_11112
 _jana_atom_site_ADP_E_11113
 _jana_atom_site_ADP_E_11122
 _jana_atom_site_ADP_E_11123
 _jana_atom_site_ADP_E_11133
 _jana_atom_site_ADP_E_11222
 _jana_atom_site_ADP_E_11223
 _jana_atom_site_ADP_E_11233
 _jana_atom_site_ADP_E_11333
 _jana_atom_site_ADP_E_12222
 _jana_atom_site_ADP_E_12223
 _jana_atom_site_ADP_E_12233
 _jana_atom_site_ADP_E_12333
 _jana_atom_site_ADP_E_13333
 _jana_atom_site_ADP_E_22222
 _jana_atom_site_ADP_E_22223
 _jana_atom_site_ADP_E_22233
 _jana_atom_site_ADP_E_22333
 _jana_atom_site_ADP_E_23333
 _jana_atom_site_ADP_E_33333
 ? ? ? ? ? ? ? ? ? ? ? ? ? ? ? ? ? ? ? ? ? ? ?

loop_
 _jana_atom_site_ADP_F_label
 _jana_atom_site_ADP_F_type_symbol
 _jana_atom_site_ADP_F_111111
 _jana_atom_site_ADP_F_111112
 _jana_atom_site_ADP_F_111113
 _jana_atom_site_ADP_F_111122
 _jana_atom_site_ADP_F_111123
 _jana_atom_site_ADP_F_111133
 _jana_atom_site_ADP_F_111222
 _jana_atom_site_ADP_F_111223
 _jana_atom_site_ADP_F_111233
 _jana_atom_site_ADP_F_111333
 _jana_atom_site_ADP_F_112222
 _jana_atom_site_ADP_F_112223
 _jana_atom_site_ADP_F_112233
 _jana_atom_site_ADP_F_112333
 _jana_atom_site_ADP_F_113333
 _jana_atom_site_ADP_F_122222
 _jana_atom_site_ADP_F_122223
 _jana_atom_site_ADP_F_122233
 _jana_atom_site_ADP_F_122333
 _jana_atom_site_ADP_F_123333
 _jana_atom_site_ADP_F_133333
 _jana_atom_site_ADP_F_222222
 _jana_atom_site_ADP_F_222223
 _jana_atom_site_ADP_F_222233
 _jana_atom_site_ADP_F_222333
 _jana_atom_site_ADP_F_223333
 _jana_atom_site_ADP_F_233333
 _jana_atom_site_ADP_F_333333
 ? ? ? ? ? ? ? ? ? ? ? ? ? ? ? ? ? ? ? ? ? ? ? ? ? ? ? ? ? ?


#=======================================================================

# 10. MOLECULAR GEOMETRY


loop_
 _geom_bond_atom_site_label_1
 _geom_bond_atom_site_label_2
 _geom_bond_site_symmetry_1
 _geom_bond_site_symmetry_2
 _geom_bond_distance
 _geom_bond_publ_flag
  Bi1 O2 . 2_655 2.708(7) ?
  Bi1 O3 . . 2.138(5) ?
  Bi1 O3 . 3_655 2.600(6) ?
  Bi1 O5 . 2_645 2.392(5) ?
  Bi1 O6 . . 2.189(6) ?
  Bi1 O6 . 2_655 2.866(5) ?
  Bi1 O8 . . 2.367(5) ?
  Eu1' O2 . 2_655 2.708(7) ?
  Eu1' O3 . . 2.138(5) ?
  Eu1' O3 . 3_655 2.600(6) ?
  Eu1' O5 . 2_645 2.392(5) ?
  Eu1' O6 . . 2.189(6) ?
  Eu1' O6 . 2_655 2.866(5) ?
  Eu1' O8 . . 2.367(5) ?
  Bi2 O2 . . 2.586(5) ?
  Bi2 O5 . . 2.280(5) ?
  Bi2 O6 . . 2.403(5) ?
  Bi2 O7 . 2_655 2.893(6) ?
  Bi2 O8 . . 2.143(6) ?
  Bi2 O9 . . 2.263(6) ?
  Ba1 O1 . . 2.867(5) ?
  Ba1 O2 . 3_655 2.859(7) ?
  Ba1 O4 . . 2.777(5) ?
  Ba1 O5 . 2_645 2.857(5) ?
  Ba1 O7 . . 2.758(5) ?
  Ba1 O8 . 3_655 2.899(6) ?
  Ba1 O9 . 4_454 2.763(5) ?
  Ba1 O10 . . 2.752(6) ?
  B1 O1 . 2_544 2.918(10) ?
  B1 O2 . 4_444 1.515(10) ?
  B1 O4 . . 1.443(12) ?
  B1 O5 . 4_454 1.484(12) ?
  B1 O10 . 3_555 1.462(10) ?
  B2 O4 . 4_555 2.836(12) ?
  B2 O7 . 3_555 1.375(11) ?
  B2 O9 . 2_655 1.360(10) ?
  B2 O9 . 4_454 2.936(11) ?
  B2 O10 . . 1.407(11) ?
  B3 O1 . 4_555 1.470(13) ?
  B3 O2 . 2_655 1.586(11) ?
  B3 O3 . 2_655 1.468(11) ?
  B3 O4 . 3_555 2.894(11) ?
  B3 O6 . . 1.462(13) ?
  B4 O1 . . 1.460(10) ?
  B4 O2 . 3_655 2.896(11) ?
  B4 O4 . 2_554 1.444(10) ?
  B4 O7 . 1_565 1.480(12) ?
  B4 O8 . 3_665 1.509(11) ?

loop_
 _geom_angle_atom_site_label_1
 _geom_angle_atom_site_label_2
 _geom_angle_atom_site_label_3
 _geom_angle_site_symmetry_1
 _geom_angle_site_symmetry_2
 _geom_angle_site_symmetry_3
 _geom_angle
 _geom_angle_publ_flag
  O2 Bi1 O3 2_655 . . 129.9(2) ?
  O2 Bi1 O3 2_655 . 3_655 122.73(18) ?
  O2 Bi1 O5 2_655 . 2_645 56.74(18) ?
  O2 Bi1 O6 2_655 . . 58.33(19) ?
  O2 Bi1 O6 2_655 . 2_655 64.04(17) ?
  O2 Bi1 O8 2_655 . . 120.45(19) ?
  O3 Bi1 O3 . . 3_655 74.95(19) ?
  O3 Bi1 O5 . . 2_645 84.4(2) ?
  O3 Bi1 O6 . . . 88.5(2) ?
  O3 Bi1 O6 . . 2_655 153.72(18) ?
  O3 Bi1 O8 . . . 80.03(19) ?
  O3 Bi1 O5 3_655 . 2_645 82.17(19) ?
  O3 Bi1 O6 3_655 . . 158.10(18) ?
  O3 Bi1 O6 3_655 . 2_655 118.93(16) ?
  O3 Bi1 O8 3_655 . . 113.8(2) ?
  O5 Bi1 O6 2_645 . . 82.0(2) ?
  O5 Bi1 O6 2_645 . 2_655 118.12(18) ?
  O5 Bi1 O8 2_645 . . 153.55(18) ?
  O6 Bi1 O6 . . 2_655 82.03(18) ?
  O6 Bi1 O8 . . . 76.4(2) ?
  O6 Bi1 O8 2_655 . . 73.93(17) ?
  O2 Eu1' O3 2_655 . . 129.9(2) ?
  O2 Eu1' O3 2_655 . 3_655 122.73(18) ?
  O2 Eu1' O5 2_655 . 2_645 56.74(18) ?
  O2 Eu1' O6 2_655 . . 58.33(19) ?
  O2 Eu1' O6 2_655 . 2_655 64.04(17) ?
  O2 Eu1' O8 2_655 . . 120.45(19) ?
  O3 Eu1' O3 . . 3_655 74.95(19) ?
  O3 Eu1' O5 . . 2_645 84.4(2) ?
  O3 Eu1' O6 . . . 88.5(2) ?
  O3 Eu1' O6 . . 2_655 153.72(18) ?
  O3 Eu1' O8 . . . 80.03(19) ?
  O3 Eu1' O5 3_655 . 2_645 82.17(19) ?
  O3 Eu1' O6 3_655 . . 158.10(18) ?
  O3 Eu1' O6 3_655 . 2_655 118.93(16) ?
  O3 Eu1' O8 3_655 . . 113.8(2) ?
  O5 Eu1' O6 2_645 . . 82.0(2) ?
  O5 Eu1' O6 2_645 . 2_655 118.12(18) ?
  O5 Eu1' O8 2_645 . . 153.55(18) ?
  O6 Eu1' O6 . . 2_655 82.03(18) ?
  O6 Eu1' O8 . . . 76.4(2) ?
  O6 Eu1' O8 2_655 . . 73.93(17) ?
  O2 Bi2 O5 . . . 162.78(19) ?
  O2 Bi2 O6 . . . 72.63(18) ?
  O2 Bi2 O7 . . 2_655 117.78(16) ?
  O2 Bi2 O8 . . . 75.88(19) ?
  O2 Bi2 O9 . . . 77.54(19) ?
  O5 Bi2 O6 . . . 100.58(18) ?
  O5 Bi2 O7 . . 2_655 78.72(16) ?
  O5 Bi2 O8 . . . 87.2(2) ?
  O5 Bi2 O9 . . . 103.46(19) ?
  O6 Bi2 O7 . . 2_655 131.91(19) ?
  O6 Bi2 O8 . . . 76.4(2) ?
  O6 Bi2 O9 . . . 146.3(2) ?
  O7 Bi2 O8 2_655 . . 150.02(18) ?
  O7 Bi2 O9 2_655 . . 76.33(19) ?
  O8 Bi2 O9 . . . 81.5(2) ?
  O1 Ba1 O2 . . 3_655 51.47(16) ?
  O1 Ba1 O4 . . . 139.04(15) ?
  O1 Ba1 O5 . . 2_645 84.98(15) ?
  O1 Ba1 O7 . . . 140.59(15) ?
  O1 Ba1 O8 . . 3_655 98.82(16) ?
  O1 Ba1 O9 . . 4_454 81.89(16) ?
  O1 Ba1 O10 . . . 85.50(17) ?
  O2 Ba1 O4 3_655 . . 112.37(16) ?
  O2 Ba1 O5 3_655 . 2_645 115.54(16) ?
  O2 Ba1 O7 3_655 . . 110.38(17) ?
  O2 Ba1 O8 3_655 . 3_655 61.14(16) ?
  O2 Ba1 O9 3_655 . 4_454 104.55(17) ?
  O2 Ba1 O10 3_655 . . 136.95(16) ?
  O4 Ba1 O5 . . 2_645 129.81(16) ?
  O4 Ba1 O7 . . . 77.98(15) ?
  O4 Ba1 O8 . . 3_655 102.86(15) ?
  O4 Ba1 O9 . . 4_454 65.29(15) ?
  O4 Ba1 O10 . . . 100.99(17) ?
  O5 Ba1 O7 2_645 . . 72.34(15) ?
  O5 Ba1 O8 2_645 . 3_655 87.78(15) ?
  O5 Ba1 O9 2_645 . 4_454 114.32(17) ?
  O5 Ba1 O10 2_645 . . 49.76(16) ?
  O7 Ba1 O8 . . 3_655 49.81(17) ?
  O7 Ba1 O9 . . 4_454 136.65(17) ?
  O7 Ba1 O10 . . . 102.36(17) ?
  O8 Ba1 O9 3_655 . 4_454 157.79(16) ?
  O8 Ba1 O10 3_655 . . 137.01(15) ?
  O9 Ba1 O10 4_454 . . 65.18(17) ?
  O1 B1 O2 2_544 . 4_444 58.4(4) ?
  O1 B1 O4 2_544 . . 55.4(4) ?
  O1 B1 O5 2_544 . 4_454 107.2(5) ?
  O1 B1 O10 2_544 . 3_555 146.2(6) ?
  O2 B1 O4 4_444 . . 108.9(7) ?
  O2 B1 O5 4_444 . 4_454 108.8(7) ?
  O2 B1 O10 4_444 . 3_555 111.2(6) ?
  O4 B1 O5 . . 4_454 112.4(6) ?
  O4 B1 O10 . . 3_555 108.9(7) ?
  O5 B1 O10 4_454 . 3_555 106.6(7) ?
  O4 B2 O7 4_555 . 3_555 57.3(4) ?
  O4 B2 O9 4_555 . 2_655 77.0(5) ?
  O4 B2 O9 4_555 . 4_454 133.9(3) ?
  O4 B2 O10 4_555 . . 143.3(6) ?
  O7 B2 O9 3_555 . 2_655 122.8(7) ?
  O7 B2 O9 3_555 . 4_454 89.2(5) ?
  O7 B2 O10 3_555 . . 117.1(7) ?
  O9 B2 O9 2_655 . 4_454 101.8(5) ?
  O9 B2 O10 2_655 . . 120.1(7) ?
  O9 B2 O10 4_454 . . 77.6(5) ?
  O1 B3 O2 4_555 . 2_655 108.8(7) ?
  O1 B3 O3 4_555 . 2_655 106.0(8) ?
  O1 B3 O4 4_555 . 3_555 56.3(4) ?
  O1 B3 O6 4_555 . . 114.1(7) ?
  O2 B3 O3 2_655 . 2_655 109.1(6) ?
  O2 B3 O4 2_655 . 3_555 56.3(4) ?
  O2 B3 O6 2_655 . . 105.6(8) ?
  O3 B3 O4 2_655 . 3_555 138.6(7) ?
  O3 B3 O6 2_655 . . 113.0(7) ?
  O4 B3 O6 3_555 . . 108.4(5) ?
  O1 B4 O2 . . 3_655 59.1(4) ?
  O1 B4 O4 . . 2_554 112.2(6) ?
  O1 B4 O7 . . 1_565 109.8(7) ?
  O1 B4 O8 . . 3_665 110.1(6) ?
  O2 B4 O4 3_655 . 2_554 56.0(4) ?
  O2 B4 O7 3_655 . 1_565 143.3(6) ?
  O2 B4 O8 3_655 . 3_665 110.7(5) ?
  O4 B4 O7 2_554 . 1_565 109.7(6) ?
  O4 B4 O8 2_554 . 3_665 108.9(6) ?
  O7 B4 O8 1_565 . 3_665 105.9(6) ?

loop_
 _geom_torsion_atom_site_label_1
 _geom_torsion_atom_site_label_2
 _geom_torsion_atom_site_label_3
 _geom_torsion_atom_site_label_4
 _geom_torsion_site_symmetry_1
 _geom_torsion_site_symmetry_2
 _geom_torsion_site_symmetry_3
 _geom_torsion_site_symmetry_4
 _geom_torsion
 _geom_torsion_publ_flag
 ? ? ? ? ? ? ? ? ? ?

loop_
 _geom_hbond_atom_site_label_D
 _geom_hbond_atom_site_label_H
 _geom_hbond_atom_site_label_A
 _geom_hbond_site_symmetry_D
 _geom_hbond_site_symmetry_H
 _geom_hbond_site_symmetry_A
 _geom_hbond_distance_DH
 _geom_hbond_distance_HA
 _geom_hbond_distance_DA
 _geom_hbond_angle_DHA
 _geom_hbond_publ_flag
 ? ? ? ? ? ? ? ? ? ? ?


#=======================================================================

# 11. STRUCTURE-FACTOR LIST

loop_
 _refln_index_h
 _refln_index_k
 _refln_index_l
 _refln_F_squared_calc
 _refln_F_squared_meas
 _refln_F_squared_sigma
 _refln_observed_status
   2   0   0   1116.43   1361.20     90.75 o
   3   0   0  83270.10  90331.80   1879.75 o
   4   0   0  94452.70  99432.40   1892.72 o
   5   0   0 279393.00 285035.00   5250.34 o
   6   0   0    891.47    868.58    155.57 o
   7   0   0  20536.40  20884.70    713.01 o
   8   0   0 100906.00  96800.80   3202.06 o
   9   0   0  39994.20  37465.40   1101.92 o
  10   0   0   2620.12   2774.26    375.95 o
  11   0   0    137.46    596.34    350.02 <
  12   0   0   2737.04   3850.25    920.43 o
  13   0   0  27312.20  28961.20   2061.25 o
  14   0   0   5579.69   4265.09   1063.03 o
   1   1   0  11040.40  10319.20    207.42 o
   2   1   0   6655.31   6870.82    181.49 o
   3   1   0 129394.00 134150.00   2268.67 o
   4   1   0  39491.20  40291.50    687.08 o
   5   1   0  10322.20  10202.50    246.31 o
   6   1   0   3700.86   3979.89    155.57 o
   7   1   0  25927.00  26549.90    544.48 o
   8   1   0  53076.70  53929.50    972.29 o
   9   1   0   7420.30   7454.19    298.17 o
  10   1   0   2169.82   2151.99    272.24 o
  11   1   0  18223.10  17241.90    855.61 o
  12   1   0  33713.60  34017.00   1555.66 o
  13   1   0   6336.43   5120.71    725.97 o
  14   1   0    474.54   -116.67    855.61 <
   0   2   0  26279.40  25292.40    829.68 o
   1   2   0  45226.20  45671.50    738.94 o
   2   2   0   5845.97   6520.80    142.60 o
   3   2   0   2429.47   2502.02     90.75 o
   4   2   0  47311.30  48562.40    829.68 o
   5   2   0  15489.10  16399.20    350.02 o
   6   2   0    973.71    868.58    116.67 o
   7   2   0   4919.04   5017.00    194.46 o
   8   2   0   2250.04   2113.10    181.49 o
   9   2   0  13167.00  13430.50    479.66 o
  10   2   0   3233.17   2955.75    272.24 o
  11   2   0   1711.18   1374.16    350.02 o
  12   2   0   1717.89   2398.31    596.34 o
  13   2   0    727.67     90.75    544.48 <
  14   2   0    108.56   -440.77    920.43 <
   1   3   0    696.39   1024.14    142.60 o
   2   3   0  18950.10  19510.50    375.95 o
   3   3   0  19654.70  19355.00    375.95 o
   4   3   0   3285.46   3318.74    129.64 o
   5   3   0  31350.00  33252.20    622.26 o
   6   3   0   6849.90   6481.91    233.35 o
   7   3   0    590.47    661.15    142.60 o
   8   3   0    193.13    311.13    181.49 <
   9   3   0   1441.82   1309.35    259.28 o
  10   3   0  20951.30  21727.30    868.58 o
  11   3   0   1244.08   1153.78    362.99 o
  12   3   0   1020.29    544.48    674.12 <
  13   3   0   2421.69   3137.24    829.68 o
  14   3   0    108.42    311.13    803.76 <
   0   4   0 115754.00 114302.00   4939.21 o
   1   4   0   1058.36   1011.18    181.49 o
   2   4   0   3960.83   3966.93    155.57 o
   3   4   0   7605.92   7454.19    220.38 o
   4   4   0  13378.30  13378.70    375.95 o
   5   4   0  24569.60  25059.00    674.12 o
   6   4   0   1212.73   1348.24    168.53 o
   7   4   0  12035.70  13249.00    414.84 o
   8   4   0  21544.40  22634.80    622.26 o
   9   4   0   5315.13   5276.27    440.77 o
  10   4   0    277.95     51.86    350.02 <
  11   4   0    967.00   1050.07    388.91 <
  12   4   0   1039.25    700.05    557.44 <
  13   4   0  10362.40  11628.50   1231.56 o
   1   5   0  33672.10  34678.20    868.58 o
   2   5   0     59.03    103.71    142.60 <
   3   5   0  32315.60  30815.00    609.30 o
   4   5   0  22045.70  21208.80    479.66 o
   5   5   0   1337.11   1620.48    181.49 o
   6   5   0   5679.82   5574.44    298.17 o
   7   5   0  26118.20  26653.60    751.90 o
   8   5   0  30652.30  31644.70   1192.67 o
   9   5   0    132.25    220.38    298.17 <
  10   5   0    625.11    738.94    298.17 <
  11   5   0   3954.68   2540.91    609.30 o
  12   5   0  18325.30  19523.50   1814.93 o
   0   6   0  26245.60  25370.20   1490.84 o
   1   6   0  49677.30  48355.00   1063.03 o
   2   6   0    607.04    596.34    181.49 o
   3   6   0   1535.13   1659.37    233.35 o
   5   6   0  14801.10  14519.50    505.59 o
   6   6   0    455.53    207.42    233.35 <
   7   6   0   2151.97   1944.57    272.24 o
   8   6   0   4155.78   3876.18    401.88 o
   9   6   0  26130.40  26822.10   1244.53 o
  10   6   0    890.62   1088.96    492.63 <
  11   6   0   5117.81   5989.28   1231.56 o
   1   7   0   4171.27   3966.93    311.13 o
   2   7   0  10303.80   9995.10    453.73 o
   3   7   0     95.66     12.96    246.31 <
   4   7   0   2190.53   2281.63    375.95 o
   5   7   0   7965.89   7324.55    570.41 o
   6   7   0    665.03    855.61    272.24 o
   7   7   0  12632.40  14039.80   1153.78 o
   8   7   0   7203.09   6650.44    661.15 o
   9   7   0    565.78    635.23    479.66 <
  10   7   0  10112.00   8296.84   1218.60 o
   0   8   0    348.49    -90.75    674.12 <
   1   8   0   8016.55   7441.23    972.29 o
   2   8   0  17198.70  17501.10    985.25 o
   3   8   0   7599.03   6118.92    674.12 o
   4   8   0   1324.84   2177.92    738.94 <
   5   8   0   1669.35   1568.62    622.26 <
   6   8   0   9531.85   8089.42    674.12 o
   7   8   0  10125.60  10034.00    790.79 o
   8   8   0    414.08    881.54    518.55 <
   1   9   0  13470.10  14908.40   1374.16 o
   2   9   0    117.73     90.75    725.97 <
   3   9   0   1728.05   2476.09    816.72 o
   4   9   0    800.68     90.75    687.08 <
 -14   1   1   1460.17   1101.92    648.19 <
 -13   1   1   5559.69   6144.85    751.90 o
 -12   1   1  10938.40  11498.90    881.54 o
 -11   1   1   4506.75   3176.13    401.88 o
 -10   1   1     90.09     25.93    181.49 <
  -9   1   1    993.32   1011.18    194.46 o
  -8   1   1   2654.99   2696.47    181.49 o
  -7   1   1   6364.17   6468.94    207.42 o
  -6   1   1  37706.70  38476.60    648.19 o
  -5   1   1   4339.16   4342.88    142.60 o
  -4   1   1  38714.00  39021.10    661.15 o
  -3   1   1  34149.10  36739.40    583.37 o
  -2   1   1  12662.90  11965.60    246.31 o
  -1   1   1  29119.10  28105.50    700.05 o
   1   1   1  12183.60  12600.80    350.02 o
   2   1   1  63039.70  65233.90   1607.51 o
   3   1   1  69452.70  74088.20   1840.86 o
   4   1   1    230.82    233.35     90.75 <
   5   1   1   2103.39   1905.68    129.64 o
   6   1   1    471.67    466.70    103.71 o
   7   1   1  26312.60  28105.50    609.30 o
   8   1   1  32162.40  31476.10    596.34 o
   9   1   1   7530.34   8180.17    350.02 o
  10   1   1   1570.21   2035.32    285.20 o
  11   1   1  13951.80  12886.00    648.19 o
  12   1   1   2706.02   2190.88    596.34 o
  13   1   1   3126.44   1737.15    583.37 <
  14   1   1   1029.57    829.68    881.54 <
 -14   2   1  26470.70  26886.90   1983.46 o
 -13   2   1   4188.27   3240.95    674.12 o
 -12   2   1   3520.24   2968.71    790.79 o
 -11   2   1    118.37   -401.88    388.91 <
 -10   2   1  17293.10  17397.40    855.61 o
  -9   2   1 140980.00 140359.00   3059.46 o
  -8   2   1    254.86    440.77    129.64 o
  -7   2   1    110.05    233.35    103.71 <
  -6   2   1  61358.00  63224.50   1076.00 o
  -5   2   1  77571.10  78055.10   1296.38 o
  -4   2   1 138748.00 143302.00   2268.67 o
  -3   2   1    414.20    466.70     64.82 o
  -2   2   1   8040.16   8128.31    155.57 o
  -1   2   1 323340.00 307190.00   4731.79 o
   0   2   1  56726.80  54292.40   1153.78 o
   1   2   1   1169.40   1426.02     90.75 o
   3   2   1    669.69    998.21    116.67 o
   4   2   1 127796.00 128860.00   1931.61 o
   5   2   1   1130.84   1088.96    116.67 o
   6   2   1  60909.70  61824.40   1153.78 o
   7   2   1  12304.70  12873.10    311.13 o
   8   2   1   5434.59   5133.67    233.35 o
   9   2   1   2466.16   2579.80    246.31 o
  10   2   1   3936.10   4083.60    337.06 o
  11   2   1  26338.60  26238.80    829.68 o
  12   2   1   5426.36   5574.44    700.05 o
  13   2   1   4188.67   3720.61    674.12 o
  14   2   1  17267.00  14610.20   1503.80 o
 -14   3   1      0.34   1063.03    842.65 <
 -13   3   1  16216.40  16269.60   1088.96 o
 -12   3   1  13047.40  11330.40    894.50 o
 -11   3   1   2587.31   2385.34    362.99 o
 -10   3   1   4856.94   4265.09    427.81 o
  -9   3   1   4262.92   3992.85    311.13 o
  -8   3   1  27340.60  28364.80    661.15 o
  -7   3   1   1358.81   1387.13    155.57 o
  -6   3   1  71936.10  75034.50   1387.13 o
  -5   3   1   7711.56   7843.11    233.35 o
  -4   3   1  20524.80  20003.20    440.77 o
  -3   3   1   2036.92   1789.01    116.67 o
  -2   3   1 105619.00 103568.00   1646.40 o
  -1   3   1 118117.00 116467.00   2164.96 o
   0   3   1    810.15    868.58    142.60 o
   1   3   1   1812.95   1724.19     77.78 o
   2   3   1 104192.00 101390.00   1620.48 o
   3   3   1 165539.00 162424.00   2761.29 o
   4   3   1  19558.50  19471.60    388.91 o
   5   3   1    211.01    298.17     90.75 o
   6   3   1  14686.30  15854.70    375.95 o
   7   3   1 102287.00 106874.00   1931.61 o
   8   3   1  37957.90  39410.00   1011.18 o
   9   3   1    216.88    -64.82    246.31 <
  10   3   1   3974.73   3526.16    466.70 o
  11   3   1  33303.60  33589.20   1400.09 o
  12   3   1  23356.90  24242.30   1166.74 o
  13   3   1   1599.05   1646.40    764.86 <
  14   3   1    190.97   -207.42    816.72 <
 -13   4   1  17803.90  15997.30   1438.98 o
 -12   4   1    168.97    972.29    557.44 <
 -11   4   1   2920.19   2852.04    414.84 o
 -10   4   1  28058.20  27509.20    816.72 o
  -9   4   1  16021.90  16023.30    505.59 o
  -8   4   1  29369.10  29700.10    622.26 o
  -7   4   1   3214.77   3552.08    220.38 o
  -6   4   1  13557.60  13612.00    362.99 o
  -5   4   1  84000.10  85159.30   1426.02 o
  -4   4   1  13303.00  13119.40    337.06 o
  -3   4   1   4919.89   5068.85    194.46 o
  -2   4   1  22083.50  22220.00    453.73 o
  -1   4   1  22331.00  22207.00    596.34 o
   0   4   1  63980.20  65337.60   1698.26 o
   1   4   1   2113.92   2333.49    168.53 o
   2   4   1   4297.71   4174.35    155.57 o
   3   4   1  38283.60  39085.90    700.05 o
   4   4   1  10374.20  11421.10    311.13 o
   5   4   1     57.74    246.31    116.67 <
   6   4   1   1216.98   1153.78    168.53 o
   7   4   1   4649.73   4109.53    272.24 o
   8   4   1   8991.34   9528.40    583.37 o
   9   4   1    311.78    362.99    337.06 <
  10   4   1  11328.10   9787.68    596.34 o
  11   4   1   1436.13   1166.74    401.88 <
  12   4   1    421.91    479.66    570.41 <
 -12   5   1    451.04   1024.14    894.50 <
 -11   5   1   5517.46   4174.35   1076.00 o
 -10   5   1   1962.90   1451.95    440.77 o
  -9   5   1    385.07    207.42    259.28 <
  -8   5   1    636.42    440.77    168.53 <
  -7   5   1  13695.70  13300.90    401.88 o
  -6   5   1   3716.82   3642.83    207.42 o
  -5   5   1   3371.75   3409.48    181.49 o
  -4   5   1  22298.90  21675.50    492.63 o
  -3   5   1   8447.31   8374.62    272.24 o
  -2   5   1  23998.50  23620.10    674.12 o
  -1   5   1   3487.62   3552.08    246.31 o
   0   5   1   1609.32   1801.97    285.20 o
   1   5   1  45057.20  43441.70    933.39 o
   2   5   1    173.16    350.02    155.57 <
   3   5   1  11026.30  10111.80    246.31 o
   4   5   1  43883.10  42819.50   1024.14 o
   5   5   1    741.26    570.41    181.49 o
   6   5   1  22945.50  22894.10    738.94 o
   7   5   1   6445.87   5548.51    362.99 o
   8   5   1    406.62    -51.86    401.88 <
   9   5   1  31604.40  32967.00   1296.38 o
  10   5   1   1142.11    751.90    401.88 <
  11   5   1    857.19   -129.64    920.43 <
 -11   6   1   5772.26   4835.50   1088.96 o
 -10   6   1    209.41    103.71    466.70 <
  -9   6   1   4533.56   4407.70    557.44 o
  -8   6   1   6923.17   7026.39    427.81 o
  -7   6   1  10423.30  10409.90    401.88 o
  -6   6   1     40.95    220.38    207.42 <
  -5   6   1    409.74    479.66    168.53 <
  -4   6   1   1134.84    816.72    155.57 o
  -3   6   1  15529.30  14999.10    531.52 o
  -2   6   1  12814.10  12691.60    479.66 o
  -1   6   1  11033.60  11071.10    440.77 o
   0   6   1     53.80     25.93    207.42 <
   1   6   1  10869.00  10656.30    414.84 o
   2   6   1  10518.10  10448.80    375.95 o
   3   6   1    225.23     64.82    220.38 <
   4   6   1  10443.00   9813.61    259.28 o
   5   6   1    502.20    388.91    220.38 <
   6   6   1  14766.80  15051.00    596.34 o
   7   6   1    374.54    842.65    350.02 <
   8   6   1   2539.36   2748.33    401.88 o
   9   6   1   1136.79   1063.03    518.55 <
  10   6   1    788.72    868.58    544.48 <
 -10   7   1   6647.01   5068.85   1127.85 o
  -9   7   1   2053.50   1905.68    505.59 o
  -8   7   1  11451.70  11019.20    777.83 o
  -7   7   1   1992.89   1711.22    388.91 o
  -6   7   1   4755.42   4783.65    440.77 o
  -5   7   1    469.62    920.43    350.02 <
  -4   7   1   4316.37   4498.44    362.99 o
  -3   7   1   5253.50   5159.60    362.99 o
  -2   7   1  24782.20  27638.80    816.72 o
  -1   7   1   7506.59   7350.48    453.73 o
   0   7   1   7660.60   6780.07    414.84 o
   1   7   1    449.92    129.64    350.02 <
   2   7   1   1581.35   2489.05    350.02 o
   3   7   1  14339.00  15517.70    803.76 o
   4   7   1    353.10   -142.60    557.44 <
   5   7   1  16872.60  17527.10    868.58 o
   6   7   1   2401.67   2035.32    311.13 o
   7   7   1  14470.70  13845.40    790.79 o
   8   7   1    145.99    142.60    557.44 <
   9   7   1   1097.99    972.29    505.59 <
  10   7   1   1611.13   2151.99    985.25 <
  -8   8   1   4457.98   4576.23    829.68 o
  -7   8   1   1395.72    803.76    453.73 <
  -6   8   1    765.29    362.99    427.81 <
  -5   8   1  39317.30  44297.30   1672.33 o
  -4   8   1   1246.10   1594.55    337.06 o
  -3   8   1   1062.06   1374.16    324.10 o
  -2   8   1   2421.74   2787.22    440.77 o
  -1   8   1   3076.00   4628.08    583.37 o
   0   8   1  26030.20  27548.10   1050.07 o
   1   8   1    474.49    713.01    648.19 <
   2   8   1  13319.10  13975.00   1270.45 o
   3   8   1  16502.80  19692.00   1516.77 o
   4   8   1   3951.15   4239.17    855.61 o
   5   8   1     36.83     25.93    414.84 <
   6   8   1   1386.26   1503.80    700.05 <
   7   8   1   5571.09   5535.55    907.47 o
   8   8   1   9401.63   9437.66    816.72 o
  -5   9   1    259.45    544.48    738.94 <
  -4   9   1    925.35    -90.75    738.94 <
  -3   9   1    160.67     90.75    687.08 <
  -2   9   1  11568.80  12289.70   1257.49 o
  -1   9   1   5532.99   6378.20   1024.14 o
   0   9   1    142.39   -401.88    531.52 <
   1   9   1   5594.33   4550.30    946.36 o
   2   9   1   6060.00   7311.59   1050.07 o
   3   9   1  10081.90  10850.70   1218.60 o
 -14   0   2  20632.50  20858.80   1801.97 o
 -13   0   2  21460.40  20003.20   1672.33 o
 -12   0   2   3278.66   3474.30    855.61 o
 -11   0   2   2339.62   2229.78    687.08 o
 -10   0   2 153351.00 145934.00   4576.23 o
  -9   0   2  14620.70  15569.50    777.83 o
  -8   0   2    386.33    622.26    181.49 o
  -7   0   2   3796.80   3707.65    207.42 o
  -6   0   2  12533.70  13145.30    375.95 o
  -5   0   2 214897.00 229084.00   4226.20 o
  -4   0   2   5518.69   6313.38    220.38 o
  -3   0   2  96467.10 100120.00   2113.10 o
  -2   0   2  39608.00  41950.90    816.72 o
  -1   0   2  29468.30  27587.00    855.61 o
   0   0   2   3558.60   3642.83    233.35 o
   1   0   2  24660.20  22725.60    725.97 o
   2   0   2  96922.90  99510.20   2955.75 o
   3   0   2  76216.40  79312.60   3409.48 o
   4   0   2   8207.08   8789.46    596.34 o
   5   0   2 165286.00 167674.00   4939.21 o
   6   0   2   9870.18   9476.55    350.02 o
   7   0   2   8665.11   8789.46    350.02 o
   8   0   2    468.32    751.90    194.46 o
   9   0   2   5691.60   6131.88    401.88 o
  10   0   2 115371.00 110387.00   5224.42 o
  11   0   2   1355.67   1088.96    790.79 <
  12   0   2    502.75    544.48    790.79 <
  13   0   2  14856.60  13456.40   1438.98 o
 -14   1   2     20.68   -427.81    622.26 <
 -13   1   2   4529.41   4887.36    700.05 o
 -12   1   2   6112.82   5211.45    687.08 o
 -11   1   2  12188.30  11343.30    622.26 o
 -10   1   2  17441.40  15932.50    687.08 o
  -9   1   2     51.22     51.86    168.53 <
  -8   1   2     26.79     12.96    142.60 <
  -7   1   2  96326.60  99626.90   1789.01 o
  -6   1   2  76887.90  76914.30   1257.49 o
  -5   1   2   3099.35   3383.55    142.60 o
  -4   1   2  12656.30  13145.30    272.24 o
  -3   1   2  65465.60  67048.80    998.21 o
  -2   1   2 176607.00 177228.00   3240.95 o
  -1   1   2  57483.00  58026.00   1218.60 o
   0   1   2   3017.55   3163.17    129.64 o
   1   1   2  48206.60  50934.80   2190.88 o
   2   1   2 170723.00 174817.00   4174.35 o
   3   1   2  49182.20  50468.10   1309.35 o
   4   1   2  11876.40  12510.10    337.06 o
   5   1   2     26.36    103.71    116.67 <
   6   1   2  54951.60  54538.80   1011.18 o
   7   1   2  74904.20  75955.00   1283.42 o
   8   1   2    540.37    713.01    155.57 o
   9   1   2    242.49    375.95    220.38 <
  10   1   2   9982.21   8024.60    440.77 o
  11   1   2   9509.60   8400.55    557.44 o
  12   1   2   4405.34   4057.67    648.19 o
  13   1   2   5396.96   5483.69    764.86 o
 -14   2   2   6376.85   4900.32   1050.07 o
 -13   2   2   1501.88    103.71    725.97 <
 -12   2   2    815.09    479.66    674.12 <
 -11   2   2   3552.78   3603.94    479.66 o
 -10   2   2   4858.19   4809.57    388.91 o
  -9   2   2  11275.90  11330.40    479.66 o
  -8   2   2    762.84    674.12    142.60 o
  -7   2   2     39.18    207.42    116.67 <
  -6   2   2  17123.20  17073.30    324.10 o
  -5   2   2   2772.91   2852.04    116.67 o
  -4   2   2   2292.69   2657.58     90.75 o
  -3   2   2   2069.85   2255.70     77.78 o
  -2   2   2   6291.94   6961.57    155.57 o
  -1   2   2  19004.00  19173.50    337.06 o
   0   2   2     51.42    155.57     77.78 <
   1   2   2   8189.32   7933.85    246.31 o
   2   2   2   2368.51   2839.07    168.53 o
   3   2   2   7199.79   7959.78    311.13 o
   4   2   2     48.12    -12.96     90.75 <
   5   2   2   3189.87   3189.10    181.49 o
   6   2   2  22198.80  22699.60    453.73 o
   7   2   2   2202.88   2203.85    155.57 o
   8   2   2   3164.12   3253.92    233.35 o
   9   2   2   5226.45   5055.89    324.10 o
  10   2   2   3233.99   3305.77    337.06 o
  11   2   2   6515.22   6624.51    544.48 o
  12   2   2   1655.39   1620.48    440.77 o
  13   2   2   1366.24   1283.42    609.30 <
 -14   3   2    797.75   1179.71    803.76 <
 -13   3   2   6628.69   5846.68    764.86 o
 -12   3   2   2972.60   3500.23    648.19 o
 -11   3   2   1392.99   1620.48    505.59 o
 -10   3   2    134.57    -77.78    233.35 <
  -9   3   2    736.80    894.50    194.46 o
  -8   3   2  17260.30  17410.40    414.84 o
  -7   3   2  13977.60  14208.30    337.06 o
  -6   3   2    374.12    350.02    103.71 o
  -5   3   2  40975.90  41899.00    609.30 o
  -4   3   2   1720.51   1685.30     90.75 o
  -3   3   2   9892.13  10461.80    207.42 o
  -2   3   2   2804.60   2761.29    103.71 o
  -1   3   2   3301.32   3072.42    103.71 o
   0   3   2 108726.00 109544.00   2048.28 o
   1   3   2   2232.16   2333.49    129.64 o
   2   3   2    668.22    790.79    181.49 o
   3   3   2   6522.04   6987.50    298.17 o
   4   3   2   1170.96    881.54    116.67 o
   5   3   2  35406.60  37089.50    687.08 o
   6   3   2    779.91    635.23    116.67 o
   7   3   2  11181.00  11473.00    350.02 o
   8   3   2  11480.10  11408.20    518.55 o
   9   3   2    540.55    609.30    350.02 <
  10   3   2    639.48    725.97    375.95 <
  11   3   2    983.67   1231.56    440.77 <
  12   3   2   2108.50   2061.25    492.63 o
  13   3   2   3461.46   3552.08    881.54 o
 -13   4   2   3463.04   2126.07    661.15 o
 -12   4   2   2420.84   1801.97    570.41 o
 -11   4   2     96.89    635.23    479.66 <
 -10   4   2  39445.40  41017.50    959.32 o
  -9   4   2    825.58    881.54    207.42 o
  -8   4   2   5058.85   5328.13    220.38 o
  -7   4   2   1803.25   1853.83    155.57 o
  -6   4   2    697.26    700.05    116.67 o
  -5   4   2  39863.50  39747.10    687.08 o
  -4   4   2   3125.24   3072.42    155.57 o
  -3   4   2  44471.80  43325.10    764.86 o
  -2   4   2  26539.40  27172.20    492.63 o
  -1   4   2   8040.43   7389.37    233.35 o
   0   4   2    292.84    375.95    194.46 <
   1   4   2   8441.21   7830.14    246.31 o
   2   4   2  23144.10  23010.80    427.81 o
   3   4   2  41778.10  41212.00    959.32 o
   4   4   2   5643.48   5989.28    207.42 o
   5   4   2  40522.40  40343.40    725.97 o
   6   4   2   1453.85   1348.24    155.57 o
   7   4   2     90.45    181.49    194.46 <
   8   4   2   3691.16   3824.32    414.84 o
   9   4   2    474.35    570.41    337.06 <
  10   4   2  30311.60  30218.60   1270.45 o
  11   4   2     10.86    362.99    388.91 <
  12   4   2   4276.40   2826.11    635.23 o
 -12   5   2    254.39    738.94    933.39 <
 -11   5   2  23042.90  19121.60   1672.33 o
 -10   5   2   4740.72   3603.94    505.59 o
  -9   5   2   2821.73   3137.24    311.13 o
  -8   5   2    266.19    -51.86    181.49 <
  -7   5   2  33212.60  34639.30    687.08 o
  -6   5   2  47527.60  48147.60    829.68 o
  -5   5   2    352.76    311.13    116.67 <
  -4   5   2   1876.85   2087.17    155.57 o
  -3   5   2  36636.80  36998.70    790.79 o
  -2   5   2  87928.90  85613.00   1711.22 o
  -1   5   2   5783.09   5444.80    298.17 o
   0   5   2    767.63    375.95    168.53 <
   1   5   2   6603.68   7389.37    453.73 o
   3   5   2  34085.10  30879.80    648.19 o
   4   5   2   3302.66   2929.82    220.38 o
   5   5   2      3.49     25.93    155.57 <
   6   5   2  35521.90  35585.70   1050.07 o
   7   5   2  25393.50  24981.30    829.68 o
   8   5   2    149.56    466.70    311.13 <
   9   5   2   5023.98   5639.26    531.52 o
  10   5   2   2576.14   2502.02    596.34 o
  11   5   2  17902.40  17786.30   1724.19 o
 -11   6   2   9272.69   9463.58   1309.35 o
 -10   6   2   8041.45   8932.07    816.72 o
  -9   6   2  20074.30  19251.30    933.40 o
  -8   6   2    213.22     77.78    324.10 <
  -7   6   2   1003.22    907.47    207.42 o
  -6   6   2  43778.20  44582.60    842.65 o
  -5   6   2   4721.47   4615.12    246.31 o
  -4   6   2    375.38    362.99    142.60 <
  -3   6   2   1614.46   1763.08    207.42 o
  -2   6   2    666.82    868.58    194.46 o
  -1   6   2  30800.10  28468.50    894.50 o
   0   6   2    222.71    518.55    427.81 <
   1   6   2  49113.70  45503.00   2294.59 o
   2   6   2    109.04    570.41    311.13 <
   3   6   2    416.98    -12.96    129.64 <
   4   6   2   1124.76    842.65    129.64 o
   5   6   2   7765.57   6793.04    272.24 o
   6   6   2  47129.10  44906.60   1555.66 o
   7   6   2     35.51    181.49    427.81 <
   8   6   2     59.41    246.31    453.73 <
   9   6   2  22101.90  21960.70   1438.98 o
 -10   7   2   1386.95    622.26    829.68 <
  -9   7   2    323.68     12.96    401.88 <
  -8   7   2  15301.00  18356.80    972.29 o
  -7   7   2   3391.51   2800.18    414.84 o
  -6   7   2  11477.60  11434.10    544.48 o
  -5   7   2  19882.40  20573.60    803.76 o
  -4   7   2    589.57    350.02    220.38 <
  -3   7   2  35321.80  36920.90    985.25 o
  -2   7   2  23686.90  23671.90    635.23 o
  -1   7   2   4842.70   4822.54    337.06 o
   0   7   2  29917.50  29505.60   1270.45 o
   1   7   2   6548.14   7000.46    570.41 o
   2   7   2  19818.90  21831.10   1011.18 o
   3   7   2  34512.10  35002.30   1374.16 o
   4   7   2    258.12    479.66    350.02 <
   6   7   2   9836.87   9048.74    479.66 o
   7   7   2   1142.01    764.86    401.88 <
   8   7   2  10289.10  10811.80   1063.03 o
  -8   8   2   5676.49   5392.95    829.68 o
  -7   8   2   4553.61   4394.73    803.76 o
  -6   8   2     21.36    700.05    648.19 <
  -5   8   2     22.96    324.10    414.84 <
  -4   8   2   3175.82   3772.47    479.66 o
  -3   8   2   4794.19   4692.90    505.59 o
  -2   8   2      1.28   -479.66    362.99 <
  -1   8   2   2726.62   2346.45    518.55 o
   0   8   2     37.57    622.26    557.44 <
   1   8   2   2338.89   2022.35    505.59 o
   2   8   2     15.79    350.02    401.88 <
   3   8   2   7993.27   9722.86   1088.96 o
   4   8   2   3115.88   2346.45    725.97 o
   5   8   2    124.22   -103.71    414.84 <
   6   8   2    601.72     90.75    661.15 <
   7   8   2   4479.35   3305.77    790.79 o
   8   8   2   6742.92   9061.71   1114.89 o
  -6   9   2   1034.90    440.77    700.05 <
  -5   9   2   2262.55    998.21    816.72 <
  -4   9   2  23832.80  24864.60   1827.90 o
  -3   9   2    691.34    881.54    544.48 <
  -2   9   2   2189.89   3124.28    855.61 o
  -1   9   2   7534.18   7415.30   1050.07 o
   0   9   2   4911.63   7194.92   1063.03 o
   1   9   2   8049.02   7233.81   1088.96 o
   2   9   2   1172.08   1296.38    803.76 <
 -14   1   3   1685.93    868.58    596.34 <
 -13   1   3   4249.12   3513.19    661.15 o
 -12   1   3   2172.89   1672.33    518.55 o
 -11   1   3  16582.30  15388.00    583.37 o
 -10   1   3   4771.80   4355.84    285.20 o
  -9   1   3  14516.40  13819.40    440.77 o
  -8   1   3  30995.80  30789.10    596.34 o
  -7   1   3  27931.50  27807.40    544.48 o
  -6   1   3   1130.71   1166.74    142.60 o
  -5   1   3   4593.44   4537.33    168.53 o
  -3   1   3  40490.50  40576.70    816.72 o
  -2   1   3  82524.80  84524.10   1789.01 o
  -1   1   3  27192.90  29570.50    583.37 o
   0   1   3    466.21    596.34     90.75 o
   1   1   3  17860.30  17967.80    518.55 o
   2   1   3   1752.11   1426.02    168.53 o
   3   1   3  33417.20  34665.20    959.32 o
   4   1   3  27547.80  28948.20    725.97 o
   5   1   3     84.00    142.60    116.67 <
   6   1   3  32865.30  32707.70    842.65 o
   7   1   3   7136.95   7713.47    246.31 o
   8   1   3   2238.55   2113.10    194.46 o
   9   1   3   1073.08   1153.78    220.38 o
  10   1   3    511.51    453.73    259.28 <
  11   1   3   3894.79   3772.47    453.73 o
  12   1   3   7542.92   7882.00    803.76 o
  13   1   3   6267.78   5639.26    777.83 o
 -14   2   3  20200.70  17566.00   1607.51 o
 -13   2   3   4070.66   4537.33    920.43 o
 -12   2   3   7890.30   6157.81    946.36 o
 -11   2   3  26899.60  29272.30    985.25 o
 -10   2   3   3494.53   3448.37    324.10 o
  -9   2   3   3391.43   3422.45    246.31 o
  -8   2   3   6165.89   6054.10    220.38 o
  -7   2   3  17630.60  17190.00    401.88 o
  -6   2   3  51753.90  51323.70    777.83 o
  -5   2   3   1689.59   1750.11    103.71 o
  -4   2   3 145314.00 142900.00   1970.50 o
  -3   2   3    600.22    777.83     90.75 o
  -2   2   3   1240.35   1503.80     90.75 o
  -1   2   3   1354.17   1296.38     64.82 o
   0   2   3  35145.60  33291.10    609.30 o
   1   2   3 261203.00 257824.00   5302.20 o
   2   2   3  11535.00  13274.90    544.48 o
   3   2   3   4977.83   5017.00    324.10 o
   4   2   3 101283.00 105188.00   2268.67 o
   5   2   3  58425.50  60022.40   1374.16 o
   6   2   3  38245.80  37984.00    959.32 o
   7   2   3    100.69   -168.53    142.60 <
   8   2   3    240.94    298.17    168.53 <
   9   2   3  96571.80 103944.00   3150.21 o
  10   2   3  12095.70  11900.80    764.86 o
  11   2   3    274.21    414.84    375.95 <
  12   2   3   1430.99   1503.80    453.73 o
  13   2   3   1671.84   2877.97    842.65 o
 -14   3   3      2.29   -544.48    920.43 <
 -13   3   3   1578.84   1451.95    609.30 <
 -12   3   3  29269.40  28637.10   1400.09 o
 -11   3   3  45059.50  48510.60   1529.73 o
 -10   3   3   5159.29   5898.53    479.66 o
  -9   3   3      4.98    155.57    272.24 <
  -8   3   3  36628.00  38697.00    622.26 o
  -7   3   3 102295.00 104229.00   1451.95 o
  -6   3   3  30735.10  29816.80    466.70 o
  -5   3   3     90.27    246.31     77.78 o
  -4   3   3  11581.70  12069.30    220.38 o
  -3   3   3 146299.00 143548.00   2009.39 o
  -2   3   3  63670.80  59322.40    972.29 o
  -1   3   3    649.44    518.55     64.82 o
   0   3   3     33.95    142.60     90.75 <
   1   3   3  53682.20  53047.90   1050.07 o
   2   3   3  84071.20  81477.60   1400.09 o
   3   3   3    409.00    544.48    129.64 o
   4   3   3  17239.80  16502.90    479.66 o
   5   3   3   4209.47   4122.49    220.38 o
   6   3   3  31841.40  33446.60    661.15 o
   7   3   3    281.87    103.71    168.53 <
   8   3   3  20909.10  21260.70    946.36 o
   9   3   3   7435.40   7298.63    570.41 o
  10   3   3   2401.82   2048.28    440.77 o
  11   3   3    596.02    648.19    453.73 <
  12   3   3  13317.60  13547.20    777.83 o
  13   3   3  10377.80   9269.13    790.79 o
 -13   4   3     98.81    414.84    596.34 <
 -12   4   3      5.45     51.86    414.84 <
 -11   4   3    261.23    220.38    375.95 <
 -10   4   3   8769.59   6559.69    661.15 o
  -9   4   3   1700.72   1866.79    220.38 o
  -8   4   3  16305.50  16606.60    401.88 o
  -7   4   3   2036.95   1970.50    155.57 o
  -6   4   3     41.54     64.82    116.67 <
  -5   4   3   3369.40   3370.59    129.64 o
  -4   4   3  17647.00  18110.40    324.10 o
  -3   4   3  57578.70  56561.10    842.65 o
  -2   4   3    467.28    492.63     77.78 o
  -1   4   3   8606.79   7843.11    220.38 o
   0   4   3  76583.70  72299.20   1387.13 o
   1   4   3  21649.70  19925.40    466.70 o
   2   4   3  31571.90  31165.00    687.08 o
   3   4   3   6570.75   6896.75    337.06 o
   4   4   3  18117.30  18045.60    414.84 o
   5   4   3  85179.10  83487.00   1503.80 o
   6   4   3  13565.30  13015.70    388.91 o
   7   4   3   3229.24   3292.81    272.24 o
   8   4   3  23676.20  24890.50   1050.07 o
   9   4   3  14814.70  14299.10    777.83 o
  10   4   3  22034.10  25162.80   1127.85 o
  11   4   3   1651.99    803.76    440.77 <
  12   4   3     76.88   -401.88    622.26 <
 -12   5   3   9064.44   8024.60   1257.49 o
 -11   5   3   3381.41   3629.87    596.34 o
 -10   5   3   2284.61   2398.31    531.52 o
  -9   5   3  27692.60  28792.60    998.21 o
  -8   5   3    372.61    220.38    168.53 <
  -7   5   3   8365.00   8465.37    259.28 o
  -6   5   3  29715.20  30179.80    570.41 o
  -5   5   3   2604.55   2437.20    155.57 o
  -4   5   3  33983.30  33641.10    596.34 o
  -3   5   3   5503.93   5509.62    194.46 o
  -2   5   3    321.29    362.99    129.64 <
  -1   5   3  50814.20  51544.10   1257.49 o
   0   5   3    599.41    298.17    155.57 <
   1   5   3    506.01    648.19    116.67 o
   2   5   3  12991.10  12497.10    298.17 o
   3   5   3   2808.50   2476.09    155.57 o
   4   5   3  18857.70  17578.90    414.84 o
   5   5   3    115.16    259.28    168.53 <
   6   5   3   6185.33   5742.97    298.17 o
   7   5   3   6794.26   6650.44    350.02 o
   8   5   3    949.83    751.90    350.02 <
   9   5   3    294.13   -207.42    492.63 <
  10   5   3    129.66    220.38    544.48 <
 -11   6   3   4216.05   4031.75    661.15 o
 -10   6   3   2460.78   1361.20    531.52 <
  -9   6   3   1052.95   1050.07    337.06 o
  -8   6   3   3535.35   2696.47    388.91 o
  -7   6   3    571.58    272.24    181.49 <
  -6   6   3  17807.60  18097.50    440.77 o
  -5   6   3   1445.20   1244.53    194.46 o
  -4   6   3   8721.63   8530.19    285.20 o
  -3   6   3    231.57    259.28    181.49 <
  -2   6   3  10190.90   9917.32    324.10 o
  -1   6   3  14769.80  14986.20    544.48 o
   0   6   3    416.39    518.55    414.84 <
   1   6   3  10588.40  12237.80    933.39 o
   2   6   3  12769.10  13093.50    933.39 o
   4   6   3     51.81    -51.86    142.60 <
   5   6   3    174.06     64.82    168.53 <
   6   6   3     72.11    -38.89    168.53 <
   7   6   3   9107.10   9295.05    894.50 o
   8   6   3   4790.04   5133.67    738.94 o
   9   6   3   3261.58   3629.87    700.05 o
 -11   7   3   5131.94   5379.98   1076.00 o
 -10   7   3   1152.26    687.08    842.65 <
  -9   7   3    886.69    920.43    531.52 <
  -8   7   3    160.65    246.31    362.99 <
  -7   7   3  17395.40  18045.60    777.83 o
  -6   7   3    954.39    518.55    298.17 <
  -5   7   3  17614.80  15582.50    674.12 o
  -4   7   3    422.25    362.99    220.38 <
  -3   7   3  16483.70  18253.00    622.26 o
  -2   7   3   2638.97   2126.07    311.13 o
  -1   7   3   2588.93   2411.27    337.06 o
   0   7   3   7394.75   6806.00    803.76 o
   1   7   3   8437.53   8711.68    635.23 o
   2   7   3  22807.90  22868.20   1050.07 o
   3   7   3   4079.23   4057.67    492.63 o
   4   7   3   7571.60   7272.70    713.01 o
   5   7   3    146.51    207.42    220.38 <
   6   7   3   7807.63   6754.15    816.72 o
   7   7   3   3217.90   3616.90    700.05 o
   9   7   3   2746.17   1970.50    687.08 <
  -6   8   3    680.90   1413.06    738.94 <
  -5   8   3      4.81   -388.91    401.88 <
  -4   8   3   7026.90   7194.92    713.01 o
  -3   8   3  19996.70  21870.00   1140.82 o
  -2   8   3   9028.37   8478.33    738.94 o
  -1   8   3    154.13    103.71    492.63 <
   0   8   3  25349.50  26173.90   1685.30 o
   1   8   3   5608.51   6624.51    648.19 o
   2   8   3   4362.69   4926.25    583.37 o
   3   8   3    806.88    557.44    414.84 <
   4   8   3   1001.64   1024.14    427.81 <
   5   8   3  35293.10  39345.20   1594.55 o
   6   8   3   1527.67   2048.28    518.55 o
   7   8   3    990.30    596.34    713.01 <
   8   8   3   3675.50   2929.82    842.65 o
  -3   9   3  12392.70  12769.40   1335.27 o
  -2   9   3   3273.29   3215.03    868.58 o
  -1   9   3   3731.62   3163.17    842.65 o
   0   9   3    176.50   -427.81    661.15 <
   1   9   3   4633.59   4109.53    803.76 o
   2   9   3  11297.10  10021.00   1050.07 o
 -14   0   4   3235.90   2359.41    868.58 <
 -13   0   4  39273.10  39850.80   2489.05 o
 -12   0   4    382.89   -103.71    674.12 <
 -11   0   4    539.62    492.63    246.31 <
 -10   0   4   3972.45   4174.35    324.10 o
  -9   0   4  35889.00  37335.80    985.25 o
  -8   0   4 112504.00 114639.00   2048.28 o
  -7   0   4  11093.40  10967.40    362.99 o
  -6   0   4    275.81    570.41    129.64 o
  -5   0   4 206799.00 213864.00   4485.48 o
  -4   0   4  69724.30  67308.10   1503.80 o
  -3   0   4  56431.10  59063.10   1503.80 o
  -2   0   4    717.47    751.90    116.67 o
  -1   0   4  21136.50  21623.60    738.94 o
   0   0   4 622015.00 638144.00  18330.80 o
   1   0   4  19538.00  17993.80    661.15 o
   2   0   4    110.96    129.64    129.64 <
   3   0   4  47912.20  50494.00   1633.44 o
   4   0   4  58863.80  59957.60   1944.57 o
   5   0   4 112199.00 105564.00   4666.97 o
   6   0   4    473.95    324.10    207.42 <
   7   0   4   9385.58   9074.67    427.81 o
   8   0   4  51138.30  53086.80   1801.97 o
   9   0   4  19386.80  18162.30    842.65 o
  10   0   4     87.16    -38.89    298.17 <
  11   0   4    904.05    738.94    790.79 <
  12   0   4   2004.26   3811.36    946.36 o
  13   0   4  12517.90  11369.30   1438.98 o
 -14   1   4   1077.81    959.32    583.37 <
 -13   1   4   5872.69   5146.63    700.05 o
 -12   1   4  30404.00  30983.50    933.40 o
 -11   1   4  16688.40  17799.30    700.05 o
 -10   1   4   4855.20   4835.50    311.13 o
  -9   1   4   6278.32   6339.30    259.28 o
  -8   1   4  34866.70  35857.90    635.23 o
  -7   1   4  14298.50  14649.10    414.84 o
  -6   1   4   1315.21   1387.13    142.60 o
  -5   1   4  20532.60  20508.80    440.77 o
  -4   1   4  38040.50  40213.70    687.08 o
  -3   1   4  70448.40  71093.50   1387.13 o
  -2   1   4  27847.70  30257.50    622.26 o
  -1   1   4  15700.10  14143.50    324.10 o
   0   1   4   1806.91   1853.83    116.67 o
   1   1   4  11136.60  10980.30    375.95 o
   2   1   4     11.56    116.67    142.60 <
   3   1   4 108272.00 112681.00   3422.45 o
   4   1   4  33311.70  33926.30    985.25 o
   5   1   4   3891.54   3772.47    233.35 o
   6   1   4   3235.76   3500.23    233.35 o
   7   1   4  28185.80  28896.30    687.08 o
   8   1   4  52115.10  51596.00   1127.85 o
   9   1   4   8904.87   8426.48    388.91 o
  10   1   4   1494.99   1024.14    246.31 o
  11   1   4  13019.40  13521.30    751.90 o
  12   1   4  28574.00  27405.50   1426.02 o
  13   1   4   4415.73   3539.12   1063.03 o
 -14   2   4    123.20   -116.67    816.72 <
 -13   2   4   2205.80   1853.83    609.30 o
 -12   2   4   4616.10   4083.60    466.70 o
 -11   2   4     48.90    596.34    337.06 <
 -10   2   4   2575.51   2476.09    285.20 o
  -9   2   4  10769.50  10915.50    388.91 o
  -8   2   4   8378.94   8219.06    272.24 o
  -7   2   4   8200.64   8439.44    246.31 o
  -6   2   4   4491.19   4809.57    168.53 o
  -5   2   4   9704.16   9904.35    246.31 o
  -4   2   4  29677.90  29363.00    596.34 o
  -3   2   4  24725.60  26381.40    479.66 o
  -2   2   4  10923.60  11654.50    220.38 o
  -1   2   4  33996.50  34470.80    583.37 o
   0   2   4  16074.60  15517.70    324.10 o
   1   2   4  24385.20  24125.70    700.05 o
   2   2   4  12719.70  13702.70    414.84 o
   3   2   4   4571.17   4991.07    337.06 o
   4   2   4  28518.20  28857.40    868.58 o
   5   2   4   7931.59   8374.62    388.91 o
   6   2   4   1540.41   1633.44    194.46 o
   7   2   4   4096.63   3370.59    311.13 o
   8   2   4   2483.88   1983.46    233.35 o
   9   2   4   6608.93   5976.32    401.88 o
  10   2   4    470.50    129.64    388.91 <
  11   2   4    530.92    401.88    466.70 <
  12   2   4    734.86    583.37    440.77 <
  13   2   4    340.61    427.81    790.79 <
 -14   3   4     86.39   1205.63    842.65 <
 -13   3   4   3843.14   4537.33    700.05 o
 -12   3   4   1132.56    855.61    401.88 <
 -11   3   4   1527.09   2320.52    414.84 o
 -10   3   4  22423.60  24164.50   1063.03 o
  -9   3   4     65.21    453.73    285.20 <
  -8   3   4    103.90     51.86    142.60 <
  -7   3   4    251.86    401.88    129.64 o
  -6   3   4   3849.37   3694.69    155.57 o
  -5   3   4  36448.10  36895.00    596.34 o
  -4   3   4    171.30    259.28     77.78 o
  -3   3   4  23715.10  23192.30    440.77 o
  -2   3   4  17310.10  17501.10    311.13 o
  -1   3   4    430.16    609.30     77.78 o
   0   3   4     38.70     77.78     90.75 <
   1   3   4   1585.53   1801.97    129.64 o
   2   3   4  18482.30  18564.20    401.88 o
   3   3   4  11987.50  11343.30    375.95 o
   4   3   4   4094.39   4265.09    233.35 o
   5   3   4  19329.70  19380.90    505.59 o
   6   3   4   5383.42   4809.57    285.20 o
   7   3   4   1785.11   1996.43    337.06 o
   8   3   4    430.90    103.71    207.42 <
   9   3   4   1814.79   1490.84    375.95 o
  10   3   4  15566.40  17099.30    920.43 o
  11   3   4    839.17   1970.50    492.63 o
  12   3   4    844.59    453.73    427.81 <
  13   3   4   1479.25   1633.44    764.86 <
 -13   4   4  12478.90  12302.70    959.32 o
 -12   4   4    905.76   1853.83    453.73 o
 -11   4   4    926.65   1348.24    401.88 o
 -10   4   4    782.95    687.08    427.81 <
  -9   4   4   8685.08   8620.94    661.15 o
  -8   4   4  27443.00  29479.70    829.68 o
  -7   4   4  17555.80  18006.70    362.99 o
  -6   4   4   3190.98   3318.74    142.60 o
  -5   4   4  28923.20  29350.10    479.66 o
  -4   4   4  11105.30  11343.30    246.31 o
  -3   4   4   4883.38   4498.44    155.57 o
  -2   4   4   9984.51   9658.04    233.35 o
  -1   4   4    938.20    920.43    129.64 o
   0   4   4 125990.00 118476.00   2229.78 o
   1   4   4   1073.33   1024.14    129.64 o
   2   4   4   8725.69   8867.25    298.17 o
   3   4   4   3505.22   3953.96    233.35 o
   4   4   4   5517.51   5665.19    311.13 o
   5   4   4  31762.80  29051.90   1076.00 o
   6   4   4    940.98    868.58    207.42 o
   7   4   4  19221.60  18654.90    622.26 o
   8   4   4  14354.90  13145.30    738.94 o
   9   4   4   3544.68   3396.52    466.70 o
  10   4   4     30.33   -142.60    388.91 <
  11   4   4   1250.53   1581.59    648.19 <
  12   4   4   3448.25   3176.13    803.76 o
 -12   5   4  22749.90  21597.70   1205.63 o
 -11   5   4   3697.12   2450.16    583.37 o
 -10   5   4   1177.08   1218.60    505.59 <
  -9   5   4      2.79    -77.78    427.81 <
  -8   5   4  26884.60  29337.10    751.90 o
  -7   5   4  27696.60  27768.50    609.30 o
  -6   5   4   7125.25   7181.95    259.28 o
  -5   5   4   4311.71   3966.93    155.57 o
  -4   5   4  12955.20  12860.10    285.20 o
  -3   5   4  32065.90  30970.50    544.48 o
  -2   5   4     59.99     12.96    116.67 <
  -1   5   4  35563.60  33822.60    816.72 o
   0   5   4    693.92    544.48    155.57 o
   1   5   4  22435.20  22829.30    531.52 o
   2   5   4    115.49    181.49    142.60 <
   3   5   4  30451.20  28338.90    725.97 o
   4   5   4  21731.60  21156.90    492.63 o
   5   5   4    354.52    764.86    155.57 o
   6   5   4   2487.75   2216.81    246.31 o
   7   5   4  16948.30  14649.10    544.48 o
   8   5   4  29642.50  31657.60   1853.83 o
   9   5   4    475.93    738.94    583.37 <
  10   5   4    327.62    700.05    622.26 <
  11   5   4   3742.54   2670.55    751.90 o
 -12   6   4   6880.11   6326.34   1166.74 o
 -11   6   4   5360.16   4239.17    687.08 o
 -10   6   4   3830.71   2800.18    583.37 o
  -9   6   4  34493.50  32954.00   1451.95 o
  -8   6   4   4074.98   3409.48    518.55 o
  -7   6   4   6457.72   6663.40    388.91 o
  -6   6   4    733.43   1205.63    194.46 o
  -5   6   4  18826.30  18810.50    583.37 o
  -4   6   4  91146.20  89515.10   1594.55 o
  -3   6   4   1241.69   1101.92    194.46 o
  -2   6   4   1876.16   1542.69    259.28 o
  -1   6   4  47213.20  47473.50   2450.16 o
   0   6   4  24418.80  23607.10   1451.95 o
   1   6   4  53267.40  58272.30   1451.95 o
   2   6   4    120.89    116.67    103.71 <
   3   6   4    564.00    466.70    142.60 o
   4   6   4  70955.50  65091.30   1309.35 o
   5   6   4  11599.90  11200.70    375.95 o
   6   6   4    251.23    324.10    220.38 <
   7   6   4   1750.36   1179.71    298.17 o
   8   6   4   2037.96   1776.04    596.34 <
   9   6   4  19232.00  20158.70   1464.91 o
 -11   7   4    953.05   -103.71    855.61 <
 -10   7   4  10202.20   7700.50   1101.92 o
  -9   7   4    245.09    194.46    492.63 <
  -8   7   4   7069.01   6067.06    661.15 o
  -7   7   4  12018.60  11330.40    648.19 o
  -6   7   4   1355.74   1400.09    427.81 o
  -5   7   4   6647.03   6676.36    557.44 o
  -4   7   4   1223.79   1542.69    272.24 o
  -3   7   4    422.50    427.81    233.35 <
  -2   7   4   7400.06   7804.21    505.59 o
  -1   7   4   7932.95   7830.14    622.26 o
   0   7   4    538.34   1231.56    544.48 <
   1   7   4   1841.59   2177.92    583.37 o
   2   7   4  10267.00   8348.70    829.68 o
   3   7   4    581.06    492.63    453.73 <
   4   7   4   3048.13   1840.86    272.24 o
   5   7   4   7743.81   6507.83    388.91 o
   6   7   4    374.85   1024.14    583.37 <
   7   7   4  11619.50   9787.68    998.21 o
   8   7   4   7277.39   7700.50    933.39 o
  -7   8   4  10413.80  13988.00   1348.24 o
  -6   8   4   9902.02   9437.66   1114.89 o
  -5   8   4   2480.48   2139.03    570.41 o
  -4   8   4   2290.12   1127.85    505.59 <
  -3   8   4   9901.94  10578.50    816.72 o
  -2   8   4  16842.20  16360.30    998.21 o
  -1   8   4   6163.02   7039.35    674.12 o
   0   8   4    739.51    155.57    596.34 <
   1   8   4   5406.48   5755.93    635.23 o
   2   8   4  13114.00  13249.00    855.61 o
   3   8   4   6234.90   6611.54    648.19 o
   4   8   4     68.69    272.24    337.06 <
   5   8   4   1278.60   1127.85    492.63 <
   6   8   4   7470.96   6896.75    700.05 o
   7   8   4   5324.12   6896.75   1063.03 o
  -2   9   4   1233.37    285.20    751.90 <
  -1   9   4   9342.42   8244.98   1050.07 o
   0   9   4     55.91    350.02    674.12 <
   1   9   4  15089.50  14986.20   1309.35 o
   2   9   4     32.63   -220.38    583.37 <
 -14   1   5   4519.81   5328.13    764.86 o
 -13   1   5   4905.26   5885.57    998.21 o
 -12   1   5   7718.85   7972.74    505.59 o
 -11   1   5   7453.08   7570.87    453.73 o
 -10   1   5    370.19    453.73    181.49 <
  -9   1   5    282.57    388.91    142.60 <
  -8   1   5   1447.43   1361.20    155.57 o
  -7   1   5   3391.28   3305.77    220.38 o
  -6   1   5  51855.30  53294.20    998.21 o
  -5   1   5   3943.78   3707.65    142.60 o
  -4   1   5  18904.80  19147.60    440.77 o
  -3   1   5  35806.50  38956.30    725.97 o
  -2   1   5   7313.12   7285.66    246.31 o
  -1   1   5  56008.30  57027.80   1244.53 o
   0   1   5   8761.84   9126.52    285.20 o
   1   1   5  10905.90  10539.60    337.06 o
   2   1   5  71785.00  72727.00   1866.79 o
   3   1   5  48873.20  49314.30   1633.44 o
   4   1   5    741.37    842.65    194.46 o
   5   1   5   4287.61   4407.70    311.13 o
   6   1   5    186.11    116.67    155.57 <
   7   1   5  26231.10  27820.30    920.43 o
   8   1   5  24813.10  24436.80    725.97 o
   9   1   5   6594.09   6144.85    362.99 o
  10   1   5   1399.95   1438.98    479.66 o
  11   1   5   9082.08   9528.40    790.79 o
  12   1   5   1297.51   1283.42    466.70 <
  13   1   5   2443.51   3305.77    985.25 o
 -14   2   5  31026.90  28650.00   1503.80 o
 -13   2   5   5811.10   6417.09    570.41 o
 -12   2   5   3741.53   4122.49    492.63 o
 -11   2   5    188.40   -207.42    337.06 <
 -10   2   5  16475.30  17449.30    596.34 o
  -9   2   5 138119.00 138337.00   2190.88 o
  -8   2   5    232.07    324.10    142.60 <
  -7   2   5   1009.22   1088.96    129.64 o
  -6   2   5  53396.60  54085.00    907.47 o
  -5   2   5  53060.70  51816.40    998.21 o
  -4   2   5  98981.50  98667.60   1607.51 o
  -3   2   5   1411.95   1322.31    103.71 o
  -2   2   5   9104.73   9061.71    233.35 o
  -1   2   5 197911.00 198683.00   3357.63 o
   0   2   5  37133.30  35572.70    674.12 o
   1   2   5   3720.88   4070.64    194.46 o
   2   2   5    555.85    401.88    116.67 o
   3   2   5   3197.59   3266.88    298.17 o
   4   2   5  74935.10  76279.10   1996.43 o
   5   2   5      1.00     90.75    181.49 <
   6   2   5  65746.70  63237.50   2113.10 o
   7   2   5   2557.25   2502.02    311.13 o
   8   2   5   2349.01   1750.11    285.20 o
   9   2   5    237.56    570.41    272.24 <
  10   2   5   5702.37   7013.42    648.19 o
  11   2   5  24405.20  25538.70   1270.45 o
  12   2   5   1560.63   2307.56    505.59 o
  13   2   5   2089.09   2307.56    972.29 <
 -13   3   5  11569.20  11641.50    713.01 o
 -12   3   5  10759.20  11654.50    687.08 o
 -11   3   5   4780.49   4355.84    466.70 o
 -10   3   5   8096.32   8439.44    544.48 o
  -9   3   5   1663.12   1451.95    246.31 o
  -8   3   5  11417.30  11680.40    350.02 o
  -7   3   5   2352.99   2139.03    142.60 o
  -6   3   5  61347.70  62407.80   1037.10 o
  -5   3   5  13378.30  13521.30    362.99 o
  -4   3   5  11787.70  11460.00    311.13 o
  -3   3   5   6485.88   6274.49    168.53 o
  -2   3   5  95659.90  94791.40   1646.40 o
  -1   3   5  81234.60  78690.30   1387.13 o
   0   3   5   3899.40   3733.58    194.46 o
   1   3   5    908.31   1101.92    129.64 o
   2   3   5  84999.20  83072.10   1646.40 o
   3   3   5 120140.00 117854.00   2268.67 o
   4   3   5  13316.80  12626.80    492.63 o
   5   3   5    472.85    505.59    155.57 o
   6   3   5  16144.30  16425.20    764.86 o
   7   3   5  69509.10  69706.40   2346.45 o
   8   3   5  23483.30  24605.30   1088.96 o
   9   3   5     83.27   -246.31    285.20 <
  10   3   5   1785.92   2437.20    492.63 o
  11   3   5  23744.60  26264.70   1257.49 o
  12   3   5  14106.70  16438.10   1011.18 o
 -13   4   5  20210.70  20949.50   1179.71 o
 -12   4   5    287.46     64.82    492.63 <
 -11   4   5   6226.44   4641.04    596.34 o
 -10   4   5  32333.20  33018.80   1413.06 o
  -9   4   5  15463.80  15660.30    881.54 o
  -8   4   5  28258.60  28455.60    751.90 o
  -7   4   5   1743.76   1866.79    155.57 o
  -6   4   5  14139.70  14325.00    311.13 o
  -5   4   5  85250.30  84900.00   1257.49 o
  -4   4   5   9291.44   8932.07    220.38 o
  -3   4   5   2426.51   2372.38    116.67 o
  -2   4   5  15292.70  14908.40    311.13 o
  -1   4   5  23886.70  23464.50    544.48 o
   0   4   5  52696.30  51362.60   1050.07 o
   1   4   5    121.40    233.35    129.64 <
   2   4   5   8557.32   8244.98    298.17 o
   3   4   5  25400.70  26005.40    583.37 o
   4   4   5   6591.47   6572.65    272.24 o
   5   4   5      5.34     25.93    246.31 <
   6   4   5   1574.58   1088.96    298.17 o
   7   4   5   6740.47   6443.01    505.59 o
   8   4   5   5752.33   4615.12    350.02 o
   9   4   5    133.85   -168.53    362.99 <
  10   4   5   9461.23  10202.50   1088.96 o
  11   4   5   2176.94   2216.81    764.86 <
  12   4   5   1187.34   1659.37    751.90 <
 -12   5   5    910.20   1698.26    609.30 <
 -11   5   5   7651.38   7259.73    738.94 o
 -10   5   5   1856.70   1750.11    518.55 o
  -9   5   5     86.63   -453.73    466.70 <
  -8   5   5    222.89    505.59    298.17 <
  -7   5   5  12597.00  13028.60    401.88 o
  -6   5   5   2199.83   2087.17    155.57 o
  -5   5   5   1699.77   1568.62    129.64 o
  -4   5   5  27284.50  25694.30    479.66 o
  -3   5   5   3751.31   3837.29    155.57 o
  -2   5   5  14818.70  14610.20    401.88 o
  -1   5   5   5191.38   4589.19    194.46 o
   0   5   5    948.82    959.32    142.60 o
   1   5   5  38642.30  37271.00   1011.18 o
   2   5   5   1042.29    570.41    181.49 o
   3   5   5   2897.89   2411.27    285.20 o
   4   5   5  27127.30  26874.00    868.58 o
   5   5   5    614.28    298.17    168.53 <
   6   5   5  15661.70  14791.70    427.81 o
   7   5   5   5731.37   4952.18    427.81 o
   8   5   5    143.18    920.43    557.44 <
   9   5   5  19093.30  20547.60   1490.84 o
  10   5   5   1523.16    505.59    674.12 <
  11   5   5    353.17   -168.53    635.23 <
 -12   6   5   1680.85   1426.02    920.43 <
 -11   6   5   8888.67   8724.65    816.72 o
 -10   6   5    881.11    790.79    518.55 <
  -9   6   5   4002.53   3137.24    557.44 o
  -8   6   5   4859.84   4329.91    453.73 o
  -7   6   5   9945.74  10656.30    583.37 o
  -6   6   5    159.10    155.57    246.31 <
  -5   6   5    236.16    337.06    181.49 <
  -4   6   5   1302.20   1205.63    194.46 o
  -3   6   5   9075.87   9126.52    311.13 o
  -2   6   5  10709.10   9904.35    350.02 o
  -1   6   5   5660.90   5237.38    259.28 o
   0   6   5    417.25    194.46    155.57 <
   1   6   5   5124.14   4757.72    246.31 o
   2   6   5   4870.51   4252.13    233.35 o
   3   6   5    339.65    337.06    168.53 <
   4   6   5   7107.45   6844.89    298.17 o
   5   6   5    121.85    311.13    207.42 <
   6   6   5  10336.10   9385.80    427.81 o
   7   6   5    262.83    220.38    298.17 <
   8   6   5   1410.63   1050.07    440.77 <
   9   6   5    484.45    868.58    440.77 <
  10   6   5    201.43   -375.95    648.19 <
 -10   7   5   6748.86   6404.12    998.21 o
  -9   7   5   1138.38    -77.78    687.08 <
  -8   7   5  18229.50  16878.90    790.79 o
  -7   7   5    678.77    453.73    337.06 <
  -6   7   5   7283.77   6818.96    596.34 o
  -5   7   5    619.73    816.72    375.95 <
  -4   7   5   4480.90   3876.18    375.95 o
  -3   7   5  10001.70  10474.80    751.90 o
  -2   7   5  19453.00  22971.90   1127.85 o
  -1   7   5  12209.60  13067.50    803.76 o
   0   7   5   7977.49   6831.93    816.72 o
   1   7   5   1544.21   1672.33    531.52 o
   2   7   5   1138.46    622.26    479.66 <
   3   7   5  13001.90  11913.70    570.41 o
   4   7   5   1313.00   1464.91    272.24 o
   5   7   5  10786.50  10345.10    661.15 o
   6   7   5    132.93    544.48    570.41 <
   7   7   5  10638.10  11382.20   1114.89 o
   8   7   5    185.77    492.63    648.19 <
  -7   8   5    779.26    181.49    738.94 <
  -6   8   5    131.73     90.75    661.15 <
  -5   8   5  37482.30  40602.70   1724.19 o
  -4   8   5   1905.51   2151.99    544.48 o
  -3   8   5    476.02    803.76    505.59 <
  -2   8   5   1476.71   1737.15    505.59 o
  -1   8   5   1507.32   1737.15    505.59 o
   0   8   5  22191.50  25305.40   1672.33 o
   1   8   5    132.54    207.42    453.73 <
   2   8   5   9752.99   9878.42    764.86 o
   3   8   5  11641.20  13378.70    855.61 o
   4   8   5   1947.02   1724.19    401.88 o
   5   8   5     37.29     77.78    583.37 <
   6   8   5   1002.61    570.41    648.19 <
  -2   9   5  14664.70  16438.10   1477.87 o
  -1   9   5   6084.15   7467.16   1037.10 o
   0   9   5     63.47   -259.28    713.01 <
   1   9   5   4310.87   3046.50    803.76 o
   2   9   5   3637.88   4291.02    829.68 o
 -14   0   6  15778.00  13365.70   1477.87 o
 -13   0   6  19052.10  18680.90   1620.48 o
 -12   0   6   2055.63   1516.77    311.13 o
 -11   0   6   1249.27    829.68    259.28 o
 -10   0   6 125723.00 126086.00   2800.18 o
  -9   0   6  10476.50  11291.50    609.30 o
  -8   0   6   3292.61   3033.53    246.31 o
  -7   0   6   8757.99   8983.92    453.73 o
  -6   0   6   2973.74   3370.59    285.20 o
  -5   0   6  98943.30 101014.00   2566.83 o
  -4   0   6   4186.61   4472.52    272.24 o
  -3   0   6 105518.00 108079.00   2683.51 o
  -2   0   6  38099.10  39747.10   1088.96 o
  -1   0   6   8461.18   7220.84    311.13 o
   0   0   6  12610.50  14584.30    492.63 o
   1   0   6  27009.30  24812.70    920.43 o
   2   0   6  95704.50  91615.30   2865.00 o
   3   0   6  32059.10  29324.10   1101.92 o
   4   0   6    552.40    570.41    233.35 <
   5   0   6 162913.00 159468.00   4861.43 o
   6   0   6  12228.80  13313.80   1011.18 o
   7   0   6   3603.05   4459.55    661.15 o
   8   0   6    113.36    285.20    298.17 <
   9   0   6   5277.29   4615.12    466.70 o
  10   0   6  80214.40  85224.10   4200.28 o
  11   0   6   2333.04   3435.41    635.23 o
  12   0   6    307.98   -259.28    881.54 <
 -14   1   6     52.02   -116.67    790.79 <
 -13   1   6   3060.42   1970.50    803.76 <
 -12   1   6  10635.80  10902.60    738.94 o
 -11   1   6  19753.60  19808.70    518.55 o
 -10   1   6  18965.70  19277.20    505.59 o
  -9   1   6     24.20    233.35    181.49 <
  -8   1   6    757.38   1127.85    207.42 o
  -7   1   6 111120.00 115391.00   1789.01 o
  -6   1   6  94981.00  95763.70   1607.51 o
  -5   1   6   1807.28   1724.19    168.53 o
  -4   1   6   7230.92   7713.47    246.31 o
  -3   1   6  57979.70  58350.10   1179.71 o
  -2   1   6 179536.00 180845.00   3746.54 o
  -1   1   6  71254.50  68863.80   1516.77 o
   0   1   6   9994.54   9774.71    324.10 o
   1   1   6  35077.70  35313.40    998.21 o
   2   1   6 127801.00 124582.00   2696.47 o
   3   1   6  37614.90  35170.80   1037.10 o
   4   1   6   7119.41   7039.35    375.95 o
   5   1   6   3530.63   3253.92    298.17 o
   6   1   6  29747.90  29777.90    972.29 o
   7   1   6  48114.80  50157.00   1464.91 o
   8   1   6    366.22    324.10    220.38 <
   9   1   6    567.66    324.10    298.17 <
  10   1   6   2523.32   2333.49    531.52 o
  11   1   6   5900.64   6300.41    713.01 o
  12   1   6   3008.09   3292.81    557.44 o
 -14   2   6   7370.40   6702.29   1127.85 o
 -13   2   6    793.74   1088.96    401.88 <
 -12   2   6    806.40    842.65    375.95 <
 -11   2   6   4911.96   4109.53    350.02 o
 -10   2   6   2264.32   2074.21    233.35 o
  -9   2   6  11232.90  11304.40    453.73 o
  -8   2   6    163.82    427.81    181.49 <
  -7   2   6    846.01    894.50    155.57 o
  -6   2   6  18321.70  18266.00    466.70 o
  -5   2   6    281.46    453.73    116.67 o
  -4   2   6      7.30     64.82     90.75 <
  -3   2   6    968.49   1127.85    129.64 o
  -2   2   6   3311.76   3707.65    155.57 o
  -1   2   6  10514.90  10280.30    246.31 o
   0   2   6    371.89    362.99     90.75 o
   1   2   6  15137.60  15128.80    414.84 o
   2   2   6   1961.78   2255.70    168.53 o
   3   2   6   1550.78   1218.60    155.57 o
   4   2   6   1319.25   1568.62    272.24 o
   5   2   6   3221.07   3837.29    311.13 o
   6   2   6  17350.50  18758.60    855.61 o
   7   2   6   1741.39   1283.42    518.55 <
   8   2   6    157.36    155.57    362.99 <
   9   2   6   6577.18   5937.43    440.77 o
  10   2   6   3480.42   3292.81    557.44 o
  11   2   6   3530.39   3552.08    609.30 o
  12   2   6    977.92   1348.24    544.48 <
 -13   3   6   6310.06   6481.91    570.41 o
 -12   3   6   4265.81   4174.35    479.66 o
 -11   3   6   1950.33   1801.97    375.95 o
 -10   3   6    354.54     77.78    285.20 <
  -9   3   6    137.50    207.42    207.42 <
  -8   3   6  16840.50  16943.70    518.55 o
  -7   3   6  10616.80  10448.80    298.17 o
  -6   3   6    287.55    362.99    129.64 <
  -5   3   6  14728.50  14947.30    388.91 o
  -4   3   6   4541.74   4355.84    168.53 o
  -3   3   6   6950.22   6896.75    194.46 o
  -2   3   6   3076.07   3059.46    129.64 o
  -1   3   6   5478.21   5483.69    168.53 o
   0   3   6  45673.80  45645.60    933.40 o
   1   3   6   2811.27   2774.26    168.53 o
   2   3   6    984.79    803.76    168.53 o
   3   3   6   5631.00   6054.10    311.13 o
   4   3   6   1897.80   1374.16    207.42 o
   5   3   6  11491.80  11343.30    596.34 o
   6   3   6    526.36    881.54    298.17 <
   7   3   6   6562.58   6624.51    531.52 o
   8   3   6   7657.19   7622.72    596.34 o
   9   3   6     99.95    285.20    388.91 <
  10   3   6   1435.73    881.54    453.73 <
  11   3   6    757.75    790.79    505.59 <
  12   3   6   1707.91   1983.46    777.83 <
 -13   4   6   3954.55   3318.74    635.23 o
 -12   4   6   3755.87   3915.07    609.30 o
 -11   4   6    433.51   1024.14    505.59 <
 -10   4   6  34793.70  32889.20   1400.09 o
  -9   4   6   1594.45   1011.18    233.35 o
  -8   4   6   3871.83   3733.58    233.35 o
  -7   4   6    100.14    414.84    142.60 <
  -6   4   6    524.11    505.59    129.64 o
  -5   4   6  41411.70  40939.70    764.86 o
  -4   4   6   3324.62   3189.10    168.53 o
  -3   4   6  32933.60  32111.40    557.44 o
  -2   4   6   5469.02   5574.44    181.49 o
  -1   4   6   4654.38   5094.78    220.38 o
   0   4   6    258.19    181.49    129.64 <
   1   4   6  13817.70  13534.20    388.91 o
   2   4   6  25178.40  24177.50    674.12 o
   3   4   6  20195.70  20858.80    635.23 o
   4   4   6   2704.98   2579.80    233.35 o
   5   4   6  24392.50  24138.60    700.05 o
   6   4   6   3090.64   2527.94    375.95 o
   7   4   6     57.38   -194.46    324.10 <
   8   4   6   1839.70   1737.15    401.88 o
   9   4   6    206.30    168.53    557.44 <
  10   4   6  18824.90  19860.60   1542.69 o
  11   4   6     19.74   -466.70    700.05 <
 -12   5   6    172.53    -77.78    544.48 <
 -11   5   6  20469.80  19679.10   1101.92 o
 -10   5   6   8198.83   8180.17    738.94 o
  -9   5   6   1434.98   1438.98    350.02 o
  -8   5   6     85.82    129.64    220.38 <
  -7   5   6  28892.80  29726.00    635.23 o
  -6   5   6  39262.40  39578.50    713.01 o
  -5   5   6   2225.95   2190.88    155.57 o
  -4   5   6    949.66    777.83    116.67 o
  -3   5   6  25288.10  25331.30    505.59 o
  -2   5   6  73318.30  72182.50   1620.48 o
  -1   5   6   3737.61   3590.98    207.42 o
   0   5   6    171.62     51.86    155.57 <
   1   5   6   4938.42   4835.50    285.20 o
   2   5   6  42131.60  43312.10   1205.63 o
   3   5   6  22895.10  21623.60    738.94 o
   4   5   6   3304.03   3163.17    324.10 o
   5   5   6    111.52    414.84    259.28 <
   6   5   6  18610.30  17851.20    738.94 o
   7   5   6  14130.60  13313.80    518.55 o
   8   5   6      2.84   -207.42    311.13 <
   9   5   6   5238.59   6896.75    933.39 o
  10   5   6    997.83    713.01    648.19 <
 -12   6   6    466.95   1050.07    829.68 <
 -11   6   6   5939.52   4433.62    933.39 o
 -10   6   6   8334.19   8854.28    751.90 o
  -9   6   6  17417.80  16995.60    764.86 o
  -8   6   6    595.20    583.37    324.10 <
  -7   6   6   1657.05   1698.26    362.99 o
  -6   6   6  31347.00  32474.30    790.79 o
  -5   6   6   2547.81   2061.25    207.42 o
  -4   6   6    472.61    311.13    142.60 <
  -3   6   6   2590.70   2463.12    220.38 o
  -2   6   6   1909.86   1529.73    207.42 o
  -1   6   6  19141.00  20379.10    583.37 o
   0   6   6   1092.35    777.83    168.53 o
   1   6   6  34398.90  32331.70    933.40 o
   2   6   6    217.18    220.38    207.42 <
   3   6   6    661.71    466.70    220.38 <
   4   6   6    654.34    492.63    194.46 <
   5   6   6   6744.36   5898.53    350.02 o
   6   6   6  35397.20  34418.90    946.36 o
   7   6   6     40.01   -362.99    388.91 <
   8   6   6     99.84   -142.60    427.81 <
   9   6   6  13606.70  14286.10    881.54 o
  10   6   6   5471.36   4783.65    894.50 o
  -8   7   6  15065.30  16217.70    985.25 o
  -7   7   6   4432.39   4239.17    453.73 o
  -6   7   6  10794.00   8569.08    622.26 o
  -5   7   6  17486.80  19925.40   1516.77 o
  -4   7   6    543.16    570.41    427.81 <
  -3   7   6  26066.00  27859.20   1296.38 o
  -2   7   6  17500.10  18564.20    998.21 o
  -1   7   6   3093.79   1737.15    700.05 <
   0   7   6  24433.30  27016.60   1711.22 o
   1   7   6   3637.87   3474.30    700.05 o
   2   7   6  11885.50  11900.80    596.34 o
   3   7   6  23687.20  23049.70    907.47 o
   4   7   6    120.78    557.44    375.95 <
   5   7   6   9689.11   9295.05    648.19 o
   6   7   6   4560.86   6028.17    868.58 o
   7   7   6    360.45     90.75    635.23 <
   8   7   6   5392.52   5146.63    868.58 o
  -6   8   6     92.92     90.75    713.01 <
  -5   8   6    488.54    207.42    518.55 <
  -4   8   6   1205.38    985.25    557.44 <
  -3   8   6   3436.57   3176.13    596.34 o
  -2   8   6    281.68    674.12    492.63 <
  -1   8   6   3168.71   2839.07    570.41 o
   0   8   6     82.23   -324.10    609.30 <
   1   8   6    378.99    155.57    544.48 <
   2   8   6     16.08    285.20    570.41 <
   3   8   6   7848.46   7298.63    868.58 o
   4   8   6   4391.45   4952.18    855.61 o
   5   8   6    153.90   -168.53    687.08 <
  -1   9   6   6266.92   7531.97   1088.96 o
   0   9   6   4199.13   5989.28   1011.18 o
   1   9   6   6296.33   5250.34    946.36 o
   2   9   6    597.84    557.44    648.19 <
 -14   1   7    876.14    466.70    790.79 <
 -13   1   7   3906.73   5211.45   1024.14 o
 -12   1   7   3865.90   4589.19    492.63 o
 -11   1   7  18128.60  17371.50    466.70 o
 -10   1   7   7325.12   7259.73    324.10 o
  -9   1   7   8574.16   8232.02    362.99 o
  -8   1   7  25193.70  25720.20    635.23 o
  -7   1   7  32810.60  33511.50    635.23 o
  -6   1   7   5687.04   6209.67    246.31 o
  -5   1   7   2210.64   2164.96    168.53 o
  -4   1   7   4207.95   4239.17    207.42 o
  -3   1   7  36073.90  36117.20    790.79 o
  -2   1   7  50479.90  50144.00   1153.78 o
  -1   1   7  12454.50  12510.10    453.73 o
   0   1   7     46.19    129.64    116.67 <
   1   1   7  12145.90  12678.60    479.66 o
   2   1   7   4215.69   3746.54    272.24 o
   3   1   7  10671.70   9619.15    388.91 o
   4   1   7  14955.20  13728.70    570.41 o
   5   1   7     54.93    142.60    259.28 <
   6   1   7  18180.50  18434.50    907.47 o
   7   1   7   2350.17   2735.36    440.77 o
   8   1   7   1398.07   1542.69    427.81 o
   9   1   7   2055.93   2087.17    350.02 o
  10   1   7     24.35    259.28    531.52 <
  11   1   7   3281.50   3629.87    661.15 o
  12   1   7   4941.31   5794.82   1205.63 o
 -13   2   7   4185.65   5017.00    531.52 o
 -12   2   7  10405.70  10721.10    518.55 o
 -11   2   7  19592.30  20003.20    674.12 o
 -10   2   7   3508.76   3694.69    324.10 o
  -9   2   7   3659.68   3746.54    298.17 o
  -8   2   7  12413.40  12484.20    492.63 o
  -7   2   7  21894.10  21999.60    505.59 o
  -6   2   7  32370.80  31579.80    622.26 o
  -5   2   7   2412.63   2592.76    142.60 o
  -4   2   7 140845.00 136314.00   2372.38 o
  -3   2   7   6307.14   5846.68    220.38 o
  -2   2   7   1624.24   1750.11    116.67 o
  -1   2   7     73.08     90.75     90.75 <
   0   2   7  24706.50  23568.20    635.23 o
   1   2   7 185717.00 178551.00   3785.43 o
   2   2   7   1189.04   1322.31    168.53 o
   3   2   7   3000.83   3098.35    220.38 o
   4   2   7  53662.70  53281.30   1179.71 o
   5   2   7  38106.60  38308.10   2087.17 o
   6   2   7  27813.80  26562.80   1633.44 o
   7   2   7    254.01    155.57    492.63 <
   8   2   7    548.74    -77.78    505.59 <
   9   2   7  53420.80  54824.00   2074.21 o
  10   2   7   9012.24   7933.85    751.90 o
  11   2   7     25.88    -64.82    505.59 <
  12   2   7    678.84    648.19    894.50 <
 -13   3   7   3025.88   2981.68    583.37 o
 -12   3   7  24076.10  21584.70   1101.92 o
 -11   3   7  44360.70  46708.60   1309.35 o
 -10   3   7   6157.95   6611.54    427.81 o
  -9   3   7      0.90   -155.57    220.38 <
  -8   3   7  41266.80  40421.20    959.32 o
  -7   3   7  77899.00  80310.80   1516.77 o
  -6   3   7  21811.20  21662.50    531.52 o
  -5   3   7    113.36    129.64    129.64 <
  -4   3   7   4261.79   4265.09    168.53 o
  -3   3   7  91362.10  89891.10   1451.95 o
  -2   3   7  43392.70  43454.70    764.86 o
  -1   3   7   6896.03   6585.62    207.42 o
   0   3   7    107.29    142.60    129.64 <
   1   3   7  29276.80  29207.50    881.54 o
   2   3   7  32620.60  30607.60    829.68 o
   3   3   7    220.54    103.71    181.49 <
   4   3   7  19609.30  19873.50    635.23 o
   5   3   7    401.38    194.46    311.13 <
   6   3   7  18443.20  17890.10    855.61 o
   7   3   7    303.44    -25.93    324.10 <
   8   3   7  14163.40  13728.70    803.76 o
   9   3   7   6618.70   6365.23    622.26 o
  10   3   7    509.07   1024.14    466.70 <
  11   3   7    597.72   1218.60    764.86 <
 -13   4   7    238.26    570.41    531.52 <
 -12   4   7    662.36    453.73    518.55 <
 -11   4   7     37.59      0.00    466.70 <
 -10   4   7   8674.77   8154.24    492.63 o
  -9   4   7   3395.62   3565.05    298.17 o
  -8   4   7  23789.40  23581.20    661.15 o
  -7   4   7    224.60    337.06    142.60 <
  -6   4   7    597.22    829.68    155.57 o
  -5   4   7   3354.62   3409.48    220.38 o
  -4   4   7  19919.70  19329.00    466.70 o
  -3   4   7  63242.60  62757.80   1153.78 o
  -2   4   7     34.25    155.57    116.67 <
  -1   4   7   4545.99   4394.73    220.38 o
   0   4   7  48147.00  47551.30   1011.18 o
   1   4   7  20923.90  21260.70    700.05 o
   2   4   7  31181.80  29531.60    920.43 o
   3   4   7   2930.60   2813.15    220.38 o
   4   4   7   9918.51   9696.93    401.88 o
   5   4   7  56327.50  54914.70   1335.27 o
   6   4   7  10284.60   9865.46    453.73 o
   7   4   7   1644.84   1153.78    272.24 o
   8   4   7  10883.60   9683.97   1037.10 o
   9   4   7   7023.50   8296.84   1024.14 o
  10   4   7  12190.30  13300.90   1322.31 o
 -12   5   7   8515.49   9126.52    816.72 o
 -11   5   7   2670.85   2087.17    570.41 o
 -10   5   7    531.53    998.21    479.66 <
  -9   5   7  25968.80  26990.70    764.86 o
  -8   5   7    192.73    259.28    233.35 <
  -7   5   7   5848.90   5820.75    298.17 o
  -6   5   7  19627.10  20106.90    440.77 o
  -5   5   7    183.82    155.57    142.60 <
  -4   5   7  24949.60  24942.40    531.52 o
  -3   5   7   2140.75   2242.74    168.53 o
  -2   5   7    698.95    842.65    155.57 o
  -1   5   7  32328.70  31994.70    907.47 o
   0   5   7    474.81    466.70    181.49 <
   1   5   7     91.57      0.00    194.46 <
   2   5   7   9882.09   8893.17    518.55 o
   3   5   7   5361.77   4083.60    337.06 o
   4   5   7   4827.60   4926.25    375.95 o
   5   5   7     26.78   -401.88    298.17 <
   6   5   7   6788.26   6326.34    479.66 o
   7   5   7   2758.59   3033.53    401.88 o
   8   5   7   2800.42   2333.49    401.88 o
   9   5   7   1225.00    972.29    375.95 <
  10   5   7    152.55    -90.75    453.73 <
 -12   6   7   2245.71   1724.19    868.58 <
 -11   6   7   3658.25   3072.42    868.58 o
 -10   6   7   1940.96   1244.53    518.55 <
  -9   6   7    551.76    518.55    350.02 <
  -8   6   7   1245.34   1050.07    337.06 o
  -7   6   7    502.53    479.66    233.35 <
  -6   6   7  14252.20  14363.90    492.63 o
  -5   6   7    772.39    894.50    220.38 o
  -4   6   7   5353.99   5250.34    298.17 o
  -3   6   7   1343.94   1050.07    259.28 o
  -2   6   7   5254.99   4796.61    337.06 o
  -1   6   7   7117.50   6818.96    324.10 o
   0   6   7    212.49    350.02    194.46 <
   1   6   7   5252.71   5561.48    350.02 o
   2   6   7  12476.40  12860.10    518.55 o
   3   6   7  11256.50  10915.50    453.73 o
   4   6   7     91.29    233.35    233.35 <
   5   6   7    118.18    453.73    246.31 <
   6   6   7    475.43    596.34    272.24 <
   7   6   7   6679.79   5911.50    596.34 o
   8   6   7   2241.00   1737.15    466.70 o
   9   6   7   3353.26   2203.85    725.97 o
  -9   7   7    862.66   1503.80    713.01 <
  -8   7   7     77.52    155.57    505.59 <
  -7   7   7  14216.10  15271.40    959.32 o
  -6   7   7   1671.78    946.36    661.15 <
  -5   7   7  16326.40  19186.40   1477.87 o
  -4   7   7     30.33    427.81    453.73 <
  -3   7   7  11445.10  12497.10    842.65 o
  -2   7   7   1966.88   2618.69    725.97 o
  -1   7   7   1458.55   1011.18    661.15 <
   0   7   7   9474.39   8880.21   1011.18 o
   1   7   7   2235.64   1283.42    337.06 o
   2   7   7  17832.90  17682.60    790.79 o
   3   7   7   3877.63   3655.80    518.55 o
   4   7   7   5834.43   6352.27    596.34 o
   5   7   7     32.52   -220.38    401.88 <
   6   7   7   3202.02   3746.54    855.61 o
   7   7   7   3347.72   3902.11    868.58 o
  -6   8   7    138.57    194.46    713.01 <
  -5   8   7    200.19    194.46    518.55 <
  -4   8   7   4754.88   6767.11    725.97 o
  -3   8   7  15983.50  18693.80   1088.96 o
  -2   8   7   4915.69   5211.45    661.15 o
  -1   8   7     11.16    259.28    505.59 <
   0   8   7  22794.80  28403.70   1374.16 o
   1   8   7   3176.78   4316.95    816.72 o
   2   8   7   2865.05   2670.55    700.05 o
   3   8   7    528.08    129.64    466.70 <
   1   9   7   1617.29   1659.37    764.86 <
 -13   0   8  41100.50  44906.60   1931.61 o
 -12   0   8    182.47     25.93    401.88 <
 -11   0   8   2345.86   2657.58    337.06 o
 -10   0   8   2312.73   1905.68    362.99 o
  -9   0   8  39805.20  37322.80   1413.06 o
  -8   0   8 102827.00  99652.80   4666.97 o
  -7   0   8   9909.92   9891.39    635.23 o
  -6   0   8   2796.98   3150.21    311.13 o
  -5   0   8 140078.00 137779.00   3448.37 o
  -4   0   8  51699.90  48925.40   1361.20 o
  -3   0   8  42162.20  41769.40   1011.18 o
  -2   0   8     10.27    142.60    155.57 <
  -1   0   8   9746.58   9606.18    414.84 o
   0   0   8 276408.00 265032.00   6391.16 o
   1   0   8  13119.20  12082.30    609.30 o
   2   0   8    179.51    350.02    233.35 <
   3   0   8  21527.80  21766.20    933.39 o
   4   0   8  23885.70  22103.30    985.25 o
   5   0   8  71827.40  67308.10   2346.45 o
   6   0   8    427.68    674.12    479.66 <
   7   0   8  10980.80  11887.80   1076.00 o
   8   0   8  28944.40  31385.40   1970.50 o
   9   0   8   8894.07   9346.91   1050.07 o
  10   0   8    356.22   -207.42    687.08 <
  11   0   8    689.55   2139.03    842.65 <
 -13   1   8   2831.91   2061.25    492.63 o
 -12   1   8  32948.40  33485.50   1063.03 o
 -11   1   8  17850.70  17838.20    466.70 o
 -10   1   8   7516.53   8154.24    388.91 o
  -9   1   8   2560.73   2126.07    298.17 o
  -8   1   8  19926.10  19640.20    583.37 o
  -7   1   8  17870.60  17112.20    466.70 o
  -6   1   8   1688.25   1698.26    168.53 o
  -5   1   8  28802.70  29376.00    700.05 o
  -4   1   8   9187.76   9683.97    324.10 o
  -3   1   8  36587.50  36532.00    816.72 o
  -2   1   8   8568.71   9152.45    337.06 o
  -1   1   8  13226.70  12769.40    427.81 o
   0   1   8   7915.90   7907.93    285.20 o
   1   1   8   2201.72   1931.61    220.38 o
   2   1   8   1040.06    738.94    194.46 o
   3   1   8  42027.50  43130.60   1270.45 o
   4   1   8  27104.80  26394.30    894.50 o
   5   1   8    299.84    324.10    324.10 <
   6   1   8   3297.32   2877.97    596.34 o
   7   1   8  12211.40  12523.00    777.83 o
   8   1   8  28748.40  32098.40   1413.06 o
   9   1   8   8921.58   8970.96    751.90 o
  10   1   8    714.30   1529.73    738.94 <
  11   1   8   7346.83   8400.55    855.61 o
 -13   2   8   4412.86   3720.61    414.84 o
 -12   2   8   6150.71   5872.61    440.77 o
 -11   2   8     17.41    168.53    311.13 <
 -10   2   8   3352.20   2151.99    324.10 o
  -9   2   8  10954.20  10487.70    479.66 o
  -8   2   8   6987.80   7207.88    375.95 o
  -7   2   8   9929.76  10176.60    453.73 o
  -6   2   8   2575.23   2450.16    181.49 o
  -5   2   8   8363.32   8724.65    285.20 o
  -4   2   8  38589.10  39137.80    803.76 o
  -3   2   8   7651.78   7648.65    246.31 o
  -2   2   8   5430.18   5367.02    207.42 o
  -1   2   8  20767.50  20080.90    427.81 o
   0   2   8   6994.04   6092.99    285.20 o
   1   2   8  24557.80  23996.00    687.08 o
   2   2   8   1299.67    998.21    168.53 o
   3   2   8    659.57    570.41    181.49 o
   4   2   8  24147.90  22933.00    738.94 o
   5   2   8   2597.82   2229.78    285.20 o
   6   2   8   1160.85   1076.00    324.10 o
   7   2   8    790.71    168.53    531.52 <
   8   2   8    162.17    -90.75    596.34 <
   9   2   8   4598.19   4537.33    609.30 o
  10   2   8    109.34    298.17    505.59 <
  11   2   8    810.07   2061.25    596.34 o
 -13   3   8   2129.98   1218.60    544.48 <
 -12   3   8   1281.48    933.39    375.95 <
 -11   3   8   2222.35   1789.01    362.99 o
 -10   3   8  13676.20  14610.20    622.26 o
  -9   3   8   1236.24    933.39    246.31 o
  -8   3   8    914.22   1063.03    259.28 o
  -7   3   8   1233.26   1516.77    285.20 o
  -6   3   8   3729.16   3435.41    207.42 o
  -5   3   8  14687.70  14934.30    375.95 o
  -4   3   8   1992.66   2139.03    168.53 o
  -3   3   8  23573.80  23503.40    531.52 o
  -2   3   8  18308.90  18862.30    401.88 o
  -1   3   8   2707.73   2774.26    168.53 o
   0   3   8   2274.98   2463.12    207.42 o
   1   3   8    109.44    414.84    181.49 <
   2   3   8  14891.40  13988.00    505.59 o
   3   3   8   8756.90   8595.01    401.88 o
   4   3   8    606.34    466.70    259.28 <
   5   3   8  19024.60  19497.60    803.76 o
   6   3   8    921.93    570.41    311.13 <
   7   3   8   1537.71   1114.89    298.17 o
   8   3   8    750.78   1088.96    311.13 o
   9   3   8    394.97    246.31    427.81 <
  10   3   8  12397.80  15595.50   1426.02 o
 -13   4   8  13661.30  14778.70   1011.18 o
 -12   4   8    208.53    298.17    479.66 <
 -11   4   8   1295.28   1011.18    350.02 <
 -10   4   8    173.80    246.31    259.28 <
  -9   4   8   7863.83   8543.15    414.84 o
  -8   4   8  25884.30  26575.80    725.97 o
  -7   4   8   9052.63   9152.45    427.81 o
  -6   4   8   5117.36   4602.15    272.24 o
  -5   4   8  26847.80  26938.80    661.15 o
  -4   4   8   8052.07   7856.07    298.17 o
  -3   4   8   1692.17   1503.80    155.57 o
  -2   4   8   4611.91   4278.06    207.42 o
  -1   4   8   1360.06   1296.38    207.42 o
   0   4   8  70293.90  68228.50   1814.93 o
   1   4   8   1581.54   1750.11    259.28 o
   2   4   8   7037.48   6559.69    285.20 o
   3   4   8    999.62    881.54    207.42 o
   4   4   8   4313.91   4148.42    311.13 o
   5   4   8  19485.60  19899.50    661.15 o
   6   4   8    643.16    479.66    272.24 <
   7   4   8  10712.90  10643.30    622.26 o
   8   4   8   7370.10   6002.25    518.55 o
   9   4   8   3528.51   3020.57    453.73 o
  10   4   8     68.75   -194.46    401.88 <
 -12   5   8  17493.70  16593.70   1037.10 o
 -11   5   8   2251.92   3189.10    609.30 o
 -10   5   8   1250.10   1348.24    298.17 o
  -9   5   8     35.66    181.49    272.24 <
  -8   5   8  17781.30  17993.80    583.37 o
  -7   5   8  15147.40  15297.30    518.55 o
  -6   5   8   7845.79   7583.83    298.17 o
  -5   5   8   6187.77   6002.25    285.20 o
  -4   5   8   5334.76   5457.76    272.24 o
  -3   5   8  18908.10  19510.50    492.63 o
  -2   5   8    765.07    570.41    194.46 <
  -1   5   8  31350.10  29790.80    894.50 o
   0   5   8   1396.73   1646.40    233.35 o
   1   5   8  12899.00  12989.70    518.55 o
   2   5   8     21.86   -168.53    246.31 <
   3   5   8  26771.30  26861.00    920.43 o
   4   5   8  14234.20  13391.60    622.26 o
   5   5   8    106.16    -51.86    324.10 <
   6   5   8    970.77    362.99    324.10 <
   7   5   8  11435.80  11784.10    661.15 o
   8   5   8  23613.10  21468.10    894.50 o
   9   5   8    468.98    -77.78    362.99 <
 -11   6   8   2386.35   1879.75    751.90 <
 -10   6   8   4854.54   4563.26    622.26 o
  -9   6   8  31450.20  34600.40   1426.02 o
  -8   6   8   4441.53   5017.00    362.99 o
  -7   6   8   7967.38   6624.51    401.88 o
  -6   6   8   1813.96   1814.93    311.13 o
  -5   6   8  15135.80  16075.10    661.15 o
  -4   6   8  66041.20  70082.40   1646.40 o
  -3   6   8   2073.68   1892.72    298.17 o
  -2   6   8   1087.07    972.29    220.38 o
  -1   6   8  32259.10  30970.50   1088.96 o
   0   6   8  17966.40  18486.40    751.90 o
   1   6   8  26449.80  27820.30   1037.10 o
   2   6   8    110.88    259.28    272.24 <
   3   6   8    187.67    272.24    272.24 <
   4   6   8  40563.50  40667.50   1257.49 o
   5   6   8   6473.35   6896.75    414.84 o
   6   6   8     23.65    220.38    311.13 <
   7   6   8    851.61    324.10    440.77 <
   8   6   8    844.18    596.34    648.19 <
   9   6   8   8206.82   8685.75   1063.03 o
  -9   7   8     57.80    557.44    596.34 <
  -8   7   8   3722.74   4991.07    842.65 o
  -7   7   8   6320.16   7544.94    738.94 o
  -6   7   8   1792.81    777.83    635.23 <
  -5   7   8   2549.29   3487.27    596.34 o
  -4   7   8    241.86   -453.73    505.59 <
  -3   7   8   1479.96    583.37    725.97 <
  -2   7   8   1785.68   1114.89    725.97 <
  -1   7   8   8727.40   9165.42   1063.03 o
   0   7   8   1801.79   1996.43    414.84 o
   1   7   8    215.19    181.49    362.99 <
   2   7   8   9174.84  10085.80   1050.07 o
   3   7   8   2438.70   2683.51    518.55 o
   4   7   8   3020.84   3046.50    531.52 o
   5   7   8   7389.69   6857.86    972.29 o
  -4   8   8   2888.57   3565.05    674.12 o
  -3   8   8   6168.71   6313.38    738.94 o
  -2   8   8  14495.30  14999.10   1024.14 o
  -1   8   8   4791.91   4368.80    674.12 o
   0   8   8    504.60    829.68    725.97 <
   1   8   8   3784.09   2514.98    803.76 o
   2   8   8   7033.89   6857.86    972.29 o
   3   8   8   4075.61   4018.78    803.76 o
 -13   1   9   4000.07   3422.45    544.48 o
 -12   1   9   8316.56   8102.38    531.52 o
 -11   1   9   9833.74   9696.93    453.73 o
 -10   1   9    403.49    479.66    207.42 <
  -9   1   9      4.79    246.31    207.42 <
  -8   1   9    288.45    168.53    233.35 <
  -7   1   9   3800.22   3889.14    259.28 o
  -6   1   9  33296.60  33705.90    894.50 o
  -5   1   9   4463.63   3941.00    220.38 o
  -4   1   9  21289.20  20521.70    492.63 o
  -3   1   9  14131.80  14895.40    427.81 o
  -2   1   9   5571.43   5146.63    246.31 o
  -1   1   9  23208.10  21844.00    635.23 o
   0   1   9   5280.46   5094.78    324.10 o
   1   1   9  14150.80  14467.60    492.63 o
   2   1   9  28527.90  28844.50    933.40 o
   3   1   9  34535.30  33615.20   1076.00 o
   4   1   9     50.32     12.96    311.13 <
   5   1   9   1212.70   1309.35    375.95 o
   6   1   9     83.77   -246.31    362.99 <
   7   1   9  11357.00  12302.70    829.68 o
   8   1   9  13925.80  14013.90    751.90 o
   9   1   9   4045.76   4563.26    635.23 o
  10   1   9     75.07    531.52    751.90 <
  11   1   9   4865.20   5237.38   1244.53 o
 -13   2   9   6875.36   7000.46    544.48 o
 -12   2   9   3882.95   2540.91    414.84 o
 -11   2   9    315.08    375.95    324.10 <
 -10   2   9   9029.54   8400.55    583.37 o
  -9   2   9 100299.00  97021.20   2242.74 o
  -8   2   9    186.21    466.70    311.13 <
  -7   2   9   2210.14   1711.22    246.31 o
  -6   2   9  26329.30  25577.60    751.90 o
  -5   2   9  22738.60  21234.70    570.41 o
  -4   2   9  59070.10  58181.60   1011.18 o
  -3   2   9    817.15    933.39    142.60 o
  -2   2   9   7866.09   8426.48    285.20 o
  -1   2   9  78422.70  75825.30   1296.38 o
   0   2   9  17736.70  17773.40    505.59 o
   1   2   9   1990.03   2579.80    233.35 o
   2   2   9   1089.44    881.54    194.46 o
   3   2   9   3201.45   2813.15    246.31 o
   4   2   9  33852.10  34756.00    998.21 o
   5   2   9     40.56    103.71    259.28 <
   6   2   9  41261.10  40110.00   1153.78 o
   7   2   9    589.53    401.88    350.02 <
   8   2   9    755.99    414.84    388.91 <
   9   2   9    224.37    -25.93    350.02 <
  10   2   9   4126.12   4174.35    479.66 o
 -13   3   9   7980.90   8089.42    583.37 o
 -12   3   9   5015.36   6054.10    505.59 o
 -11   3   9   6351.79   6183.74    479.66 o
 -10   3   9   8754.03   9359.87    440.77 o
  -9   3   9      5.78    -25.93    259.28 <
  -8   3   9   5327.68   5017.00    362.99 o
  -7   3   9   2679.61   2579.80    350.02 o
  -6   3   9  51615.90  50649.60   1244.53 o
  -5   3   9   9258.21   9372.84    311.13 o
  -4   3   9   2355.04   2190.88    181.49 o
  -3   3   9   5790.50   5872.61    246.31 o
  -2   3   9  53013.70  52697.90   1011.18 o
  -1   3   9  66513.00  65998.80   1244.53 o
   0   3   9   2151.86   1789.01    207.42 o
   1   3   9    636.85    674.12    233.35 <
   2   3   9  55350.20  53566.50   1335.27 o
   3   3   9  60299.70  60216.90   1737.15 o
   4   3   9  10003.50   9009.85    531.52 o
   5   3   9    711.44    350.02    311.13 <
   6   3   9   6856.50   6948.60    544.48 o
   7   3   9  42928.00  43091.70   1205.63 o
   8   3   9  13897.70  14312.00    635.23 o
   9   3   9    171.76   -466.70    401.88 <
  10   3   9    872.40    570.41    505.59 <
 -13   4   9  23425.90  24047.90   1698.26 o
 -12   4   9   1234.07   1607.51    401.88 o
 -11   4   9   5323.63   4537.33    466.70 o
 -10   4   9  22916.50  23853.40    725.97 o
  -9   4   9  12637.50  13391.60    505.59 o
  -8   4   9  25149.80  24877.60    713.01 o
  -7   4   9   1488.27   1296.38    311.13 o
  -6   4   9   5682.78   6533.76    544.48 o
  -5   4   9  56871.40  57870.50   1231.56 o
  -4   4   9   7207.24   6611.54    285.20 o
  -3   4   9   1809.31   1620.48    168.53 o
  -2   4   9   8311.10   8569.08    324.10 o
  -1   4   9   6510.54   6507.83    298.17 o
   0   4   9  23276.30  22790.40    635.23 o
   1   4   9    132.39    272.24    168.53 <
   2   4   9   6652.10   6844.89    350.02 o
   3   4   9   9540.27   9333.95    518.55 o
   4   4   9    851.53    375.95    233.35 <
   5   4   9     83.91   -233.35    259.28 <
   6   4   9    643.98    453.73    362.99 <
   7   4   9   6496.49   5496.66    518.55 o
   8   4   9   1310.45   1789.01    414.84 o
   9   4   9     67.21    246.31    388.91 <
 -12   5   9   1144.84   1801.97    829.68 <
 -11   5   9   3185.46   3383.55    440.77 o
 -10   5   9   3856.15   4005.82    427.81 o
  -9   5   9    478.26    777.83    272.24 <
  -8   5   9     94.33     12.96    246.31 <
  -7   5   9  11815.70  11304.40    453.73 o
  -6   5   9    113.93    103.71    350.02 <
  -5   5   9   3367.95   3007.60    324.10 o
  -4   5   9  20351.40  20158.70    622.26 o
  -3   5   9    287.36    -38.89    194.46 <
  -2   5   9  19262.90  19160.50    648.19 o
  -1   5   9   5592.50   5587.40    350.02 o
   0   5   9   1772.99   1789.01    259.28 o
   1   5   9  30004.50  29790.80    933.40 o
   2   5   9    873.37    777.83    285.20 <
   3   5   9   3682.09   3059.46    375.95 o
   4   5   9  17214.10  16451.10    725.97 o
   5   5   9    308.31    479.66    362.99 <
   6   5   9  11729.70  11187.80    648.19 o
   7   5   9   3519.97   3500.23    479.66 o
   8   5   9    276.76   -220.38    401.88 <
   9   5   9  11250.00   9515.44    764.86 o
 -10   6   9    188.72    233.35    661.15 <
  -9   6   9   3016.64   2968.71    388.91 o
  -8   6   9   4900.52   4705.86    362.99 o
  -7   6   9   9249.47   9204.31    492.63 o
  -6   6   9     42.28    -51.86    298.17 <
  -5   6   9    549.77    414.84    324.10 <
  -4   6   9    455.27    622.26    298.17 <
  -3   6   9   9143.60   9709.90    570.41 o
  -2   6   9   6816.80   6196.70    427.81 o
  -1   6   9   7206.78   6741.18    453.73 o
   0   6   9   1517.19   1283.42    298.17 o
   1   6   9   2825.27   2177.92    350.02 o
   2   6   9   3301.06   3215.03    362.99 o
   3   6   9    197.89   -194.46    311.13 <
   4   6   9   9094.63   8232.02    518.55 o
   5   6   9      9.91    298.17    427.81 <
   6   6   9   7982.06   8504.26    713.01 o
   7   6   9     51.58   -285.20    674.12 <
   8   6   9   1451.78    764.86    713.01 <
  -9   7   9    604.48   -557.44    700.05 <
  -8   7   9  12799.30  15647.30   1335.27 o
  -7   7   9    417.75    881.54    725.97 <
  -6   7   9   6754.57   8867.25   1076.00 o
  -5   7   9   2028.57   3461.34    622.26 o
  -4   7   9   4110.29   4278.06    622.26 o
  -3   7   9   7702.26   8504.26   1140.82 o
  -2   7   9  14959.30  18201.20   1529.73 o
  -1   7   9   7715.31   8037.56   1114.89 o
   0   7   9   3792.93   3616.90    816.72 o
   1   7   9    975.32   1244.53    687.08 <
   2   7   9    855.49    842.65    492.63 <
   3   7   9  11382.20  12847.10    855.61 o
   4   7   9    963.20    337.06    466.70 <
  -2   8   9    604.92    738.94    816.72 <
  -1   8   9   1641.84   3370.59    868.58 o
   0   8   9  16959.00  16775.20   1503.80 o
   1   8   9    567.14   1024.14    738.94 <
   2   8   9   8896.15  11641.50   1205.63 o
 -13   0  10  10464.60   8465.37   1257.49 o
 -12   0  10   1174.73    946.36    466.70 <
 -11   0  10    172.27   -842.65    700.05 <
 -10   0  10  63574.50  64767.20   2203.85 o
  -9   0  10   5536.66   5055.89    466.70 o
  -8   0  10   5930.05   4744.75    738.94 o
  -7   0  10   1696.00   1153.78    518.55 <
  -6   0  10    524.24    998.21    427.81 <
  -5   0  10  43389.20  42910.20   1244.53 o
  -4   0  10   6403.37   6028.17    324.10 o
  -3   0  10  62442.70  62576.30   1477.87 o
  -2   0  10  11731.60  11745.20    505.59 o
  -1   0  10   1333.05   1348.24    233.35 o
   0   0  10   8530.98   8543.15    544.48 o
   1   0  10  32579.40  30270.50   1218.60 o
   2   0  10  58878.60  56911.10   2022.35 o
   3   0  10   9972.76   9424.69    635.23 o
   4   0  10    642.44    635.23    375.95 <
   5   0  10  76919.00  75306.80   3811.36 o
   6   0  10  13644.20  12419.30   1218.60 o
   7   0  10   3175.87   3150.21    557.44 o
   8   0  10    105.88   -194.46    479.66 <
   9   0  10   4012.61   3111.31    609.30 o
 -13   1  10   1476.83   1283.42    635.23 <
 -12   1  10   8485.90   6844.89    700.05 o
 -11   1  10  15010.50  14804.70    985.25 o
 -10   1  10  16659.90  17475.20   1011.18 o
  -9   1  10   2261.18   1711.22    181.49 o
  -8   1  10    196.73    285.20    142.60 <
  -7   1  10  61800.60  56885.20   1892.72 o
  -6   1  10  52548.50  51155.20   1426.02 o
  -5   1  10   1784.36   1620.48    246.31 o
  -4   1  10   9431.72   9308.02    324.10 o
  -3   1  10  20681.50  20327.30    505.59 o
  -2   1  10  81291.80  78794.00   1464.91 o
  -1   1  10  36780.30  35870.90    842.65 o
   0   1  10   3775.28   3539.12    311.13 o
   1   1  10  24926.60  24151.60    842.65 o
   2   1  10  46526.90  45853.00   1179.71 o
   3   1  10   9637.68   8491.30    622.26 o
   4   1  10   2197.37   2229.78    440.77 o
   5   1  10   1728.35   1659.37    466.70 o
   6   1  10  12895.50  15310.30    907.47 o
   7   1  10  15825.20  16477.00    998.21 o
   8   1  10   1089.48   1231.56    518.55 <
   9   1  10    688.00    427.81    440.77 <
 -13   2  10    583.50    492.63    401.88 <
 -12   2  10    871.13   1037.10    375.95 <
 -11   2  10   2959.64   2865.00    401.88 o
 -10   2  10   2767.56   3150.21    453.73 o
  -9   2  10   5869.61   5794.82    401.88 o
  -8   2  10    221.77    246.31    401.88 <
  -7   2  10    246.49    142.60    259.28 <
  -6   2  10   7542.33   7441.23    311.13 o
  -5   2  10    324.21    116.67    233.35 <
  -4   2  10     92.82    194.46    155.57 <
  -3   2  10   2551.92   2489.05    194.46 o
  -2   2  10    611.92    777.83    168.53 o
  -1   2  10   2901.92   2968.71    194.46 o
   0   2  10    884.15    725.97    181.49 o
   1   2  10   9839.43  10409.90    388.91 o
   2   2  10   3160.51   2981.68    285.20 o
   3   2  10    819.09    414.84    285.20 <
   4   2  10    659.71    427.81    259.28 <
   5   2  10   3326.34   3176.13    362.99 o
   6   2  10  10613.60  10643.30    557.44 o
   7   2  10    737.05    427.81    337.06 <
   8   2  10    164.65    233.35    401.88 <
   9   2  10   4131.72   3396.52    518.55 o
 -13   3  10   6464.25   6404.12    725.97 o
 -12   3  10   3702.95   3331.70    440.77 o
 -11   3  10   1918.06   1750.11    375.95 o
 -10   3  10     13.77    -25.93    324.10 <
  -9   3  10    629.00    635.23    272.24 <
  -8   3  10  17190.40  18849.40    998.21 o
  -7   3  10   7316.28   6507.83    596.34 o
  -6   3  10    214.35    142.60    207.42 <
  -5   3  10  10743.90  11408.20    440.77 o
  -4   3  10     69.21    129.64    194.46 <
  -3   3  10   5186.10   5704.08    285.20 o
  -2   3  10   3000.36   2916.86    233.35 o
  -1   3  10   3007.85   2916.86    246.31 o
   0   3  10  34818.70  35248.60    920.43 o
   1   3  10     87.41    155.57    246.31 <
   2   3  10   1514.93   1542.69    362.99 o
   3   3  10   2958.60   3344.66    375.95 o
   4   3  10    878.47    764.86    324.10 <
   5   3  10   8468.68   8595.01    583.37 o
   6   3  10     62.68    246.31    350.02 <
   7   3  10   3920.02   5379.98    661.15 o
   8   3  10   3885.66   4135.46    518.55 o
   9   3  10    126.03   -103.71    570.41 <
 -12   4  10   4947.73   5107.74    505.59 o
 -11   4  10   1467.52   1503.80    401.88 o
 -10   4  10  26401.10  26951.80    920.43 o
  -9   4  10   1119.52   1076.00    285.20 o
  -8   4  10   3693.97   4031.75    414.84 o
  -7   4  10    280.05    544.48    375.95 <
  -6   4  10    190.27    751.90    388.91 <
  -5   4  10  30524.90  29881.60    764.86 o
  -4   4  10   2036.37   2087.17    272.24 o
  -3   4  10  28365.70  28624.10    777.83 o
  -2   4  10   2864.04   2450.16    194.46 o
  -1   4  10   3493.63   3422.45    259.28 o
   0   4  10     26.35     77.78    194.46 <
   1   4  10   6842.68   7454.19    324.10 o
   2   4  10  21302.70  21247.70    829.68 o
   3   4  10   8752.99   7493.08    609.30 o
   4   4  10   2303.76   1581.59    375.95 o
   5   4  10  19449.20  18266.00    816.72 o
   6   4  10   2368.51   2527.94    453.73 o
   7   4  10     33.76   -155.57    427.81 <
   8   4  10    540.86    751.90    414.84 <
   9   4  10    105.53   -427.81    738.94 <
 -12   5  10    486.38   1438.98    622.26 <
 -11   5  10  19170.10  19614.20    803.76 o
 -10   5  10   8593.59   8776.50    544.48 o
  -9   5  10   1168.97   1101.92    298.17 o
  -8   5  10     96.89    609.30    298.17 <
  -7   5  10  24055.70  24164.50    803.76 o
  -6   5  10  30885.10  31437.20   1309.35 o
  -5   5  10   1936.92   1866.79    388.91 o
  -4   5  10   1050.55   1140.82    246.31 o
  -3   5  10  17238.80  15647.30    622.26 o
  -2   5  10  52217.30  53670.20   1853.83 o
  -1   5  10   4421.39   5159.60    466.70 o
   0   5  10    384.10    479.66    324.10 <
   1   5  10   1776.53   2151.99    337.06 o
   2   5  10  28531.20  29751.90   1024.14 o
   3   5  10  15185.90  16204.80    738.94 o
   4   5  10   1932.96   1620.48    362.99 o
   5   5  10    704.92   -246.31    401.88 <
   6   5  10   7251.87   6131.88    557.44 o
   7   5  10   9233.28   8128.31    738.94 o
   8   5  10     24.01     12.96    492.63 <
 -10   6  10   4766.59   5302.20    946.36 o
  -9   6  10  13966.00  14117.60    868.58 o
  -8   6  10    622.35    492.63    388.91 <
  -7   6  10   3457.27   2657.58    362.99 o
  -6   6  10  24389.70  26070.20    855.61 o
  -5   6  10    600.42    907.47    362.99 <
  -4   6  10    746.45    894.50    350.02 <
  -3   6  10   1193.97   1114.89    272.24 o
  -2   6  10   5034.03   4420.66    401.88 o
  -1   6  10  10788.10  12782.30    661.15 o
   0   6  10    730.95    648.19    337.06 <
   1   6  10  26672.30  26731.40   1076.00 o
   2   6  10    386.57    440.77    311.13 <
   3   6  10   1769.05   1646.40    453.73 o
   4   6  10    619.68    324.10    440.77 <
   5   6  10   3862.67   3863.22    570.41 o
   6   6  10  24984.90  24540.50   1633.44 o
   7   6  10     69.39   -298.17    648.19 <
  -8   7  10  15103.00  17060.40   1438.98 o
  -7   7  10   5155.32   6248.56    998.21 o
  -6   7  10   9522.40   9411.73   1101.92 o
  -5   7  10  14653.10  15089.90   1011.18 o
  -4   7  10    473.96    337.06    790.79 <
  -3   7  10  18512.00  23244.10   1814.93 o
  -2   7  10  13100.20  14234.30   1438.98 o
  -1   7  10   2183.13   2877.97    907.47 o
   0   7  10  17356.70  21636.60   1672.33 o
   1   7  10   1492.69   2255.70    790.79 <
   2   7  10   6398.88   7882.00    751.90 o
   3   7  10  14869.30  17151.10   1426.02 o
   4   7  10     54.75   -324.10    713.01 <
   0   8  10    699.86    622.26    790.79 <
   1   8  10      1.51   -596.34    777.83 <
   2   8  10    128.94   -751.90    751.90 <
 -13   1  11   2478.47   2255.70    868.58 <
 -12   1  11   2053.53   1996.43    531.52 o
 -11   1  11  15637.10  14817.60   1438.98 o
 -10   1  11   5002.00   4783.65    946.36 o
  -9   1  11  10364.10  10617.40   1127.85 o
  -8   1  11  19026.00  16567.80    570.41 o
  -7   1  11  18999.50  17643.80    803.76 o
  -6   1  11   1718.73   1659.37    311.13 o
  -5   1  11   1399.41   1620.48    285.20 o
  -4   1  11   6185.59   7259.73    414.84 o
  -3   1  11  18696.30  17967.80    583.37 o
  -2   1  11  25335.20  26238.80    751.90 o
  -1   1  11  17404.60  16684.40    661.15 o
   0   1  11     61.99     25.93    246.31 <
   1   1  11   3221.57   3111.31    337.06 o
   2   1  11    464.79    557.44    272.24 <
   3   1  11   4025.89   3824.32    401.88 o
   4   1  11  14503.90  16256.60    920.43 o
   5   1  11    360.95    479.66    453.73 <
   6   1  11   9646.16   7544.94    725.97 o
   7   1  11   2826.98   2618.69    583.37 o
   8   1  11   1046.25   1063.03    531.52 <
 -12   2  11  11341.70  11006.30    622.26 o
 -11   2  11   8772.04   9139.49    674.12 o
 -10   2  11   1082.09   1348.24    505.59 <
  -9   2  11   4174.35   3253.92    401.88 o
  -8   2  11  14013.90  14312.00    881.54 o
  -7   2  11  20305.70  18771.60    985.25 o
  -6   2  11  12771.00  11265.60    687.08 o
  -5   2  11   4469.39   4005.82    362.99 o
  -4   2  11  98611.10  96684.10   2164.96 o
  -3   2  11   6129.93   5691.11    324.10 o
  -2   2  11   2773.14   2800.18    233.35 o
  -1   2  11   1174.53   1063.03    207.42 o
   0   2  11  16988.10  15777.00    583.37 o
   1   2  11 103341.00 102272.00   2100.14 o
   2   2  11     72.78    -25.93    233.35 <
   3   2  11    592.29    557.44    311.13 <
   4   2  11  27022.80  28144.40   1063.03 o
   5   2  11  20028.40  21507.00    790.79 o
   6   2  11  14891.20  16930.70    713.01 o
   7   2  11     21.58   -311.13    350.02 <
   8   2  11    496.63   -259.28    453.73 <
 -13   3  11   2177.49   1503.80    700.05 <
 -12   3  11  19965.80  19277.20    816.72 o
 -11   3  11  30799.00  29998.30   1011.18 o
 -10   3  11   5010.18   4329.91    635.23 o
  -9   3  11     46.95    427.81    337.06 <
  -8   3  11  24911.90  26031.30   1244.53 o
  -7   3  11  52283.10  50831.10   1931.61 o
  -6   3  11  12194.00  12341.50    414.84 o
  -5   3  11     99.18   -142.60    207.42 <
  -4   3  11   1763.96   1529.73    246.31 o
  -3   3  11  40520.30  42080.50   1270.45 o
  -2   3  11  23804.60  25110.90    868.58 o
  -1   3  11   4718.09   4628.08    272.24 o
   0   3  11   1809.43   1866.79    233.35 o
   1   3  11  10298.30  10695.10    557.44 o
   2   3  11  13700.60  14195.40    829.68 o
   3   3  11    210.43    324.10    375.95 <
   4   3  11  14464.30  15219.50    751.90 o
   5   3  11    216.41    596.34    362.99 <
   6   3  11   5352.08   4394.73    518.55 o
   7   3  11    183.19     64.82    414.84 <
   8   3  11   8645.97   7882.00    661.15 o
 -12   4  11    290.76    233.35    401.88 <
 -11   4  11    202.84    764.86    375.95 <
 -10   4  11   5096.31   4718.83    518.55 o
  -9   4  11   3393.90   2890.93    427.81 o
  -8   4  11  17120.50  17345.60    985.25 o
  -7   4  11     94.93   -194.46    427.81 <
  -6   4  11   2823.28   3266.88    466.70 o
  -5   4  11   3513.68   2592.76    414.84 o
  -4   4  11  10947.50  11563.70    674.12 o
  -3   4  11  37229.50  36104.20   1387.13 o
  -1   4  11   3990.47   3928.03    350.02 o
   0   4  11  31901.00  33667.00   1076.00 o
   1   4  11  10584.80  11330.40    725.97 o
   2   4  11  15368.20  15712.10    725.97 o
   3   4  11   2037.55   2139.03    375.95 o
   4   4  11   6525.83   7441.23    544.48 o
   5   4  11  30943.60  32617.00   1192.67 o
   6   4  11   3238.96   2839.07    466.70 o
   7   4  11    258.97    466.70    414.84 <
   8   4  11   6233.24   6313.38    725.97 o
 -11   5  11   3155.18   3305.77    674.12 o
 -10   5  11    243.22    -25.93    427.81 <
  -9   5  11  19491.90  18693.80    842.65 o
  -8   5  11    431.55    842.65    324.10 <
  -7   5  11   4248.28   3850.25    544.48 o
  -6   5  11  10383.50  10461.80    725.97 o
  -5   5  11    188.05    505.59    401.88 <
  -4   5  11  11553.60  10915.50    661.15 o
  -3   5  11   2283.40   2359.41    401.88 o
  -2   5  11    164.06    -77.78    337.06 <
  -1   5  11  13080.50  12613.80    725.97 o
   0   5  11    246.06     90.75    362.99 <
   1   5  11     95.65    311.13    324.10 <
   2   5  11   5581.00   5639.26    479.66 o
   3   5  11   2262.53    777.83    375.95 <
   4   5  11    420.94     64.82    388.91 <
   5   5  11     11.09   -207.42    414.84 <
   6   5  11   3115.34   1503.80    531.52 <
   7   5  11    871.58    401.88    492.63 <
 -10   6  11   2801.12   3590.98    907.47 o
  -9   6  11     37.55   -337.06    751.90 <
  -8   6  11   1254.15   1283.42    466.70 <
  -7   6  11    380.16   -246.31    362.99 <
  -6   6  11  13319.10  15439.90    751.90 o
  -5   6  11   1271.95    933.39    401.88 <
  -4   6  11   3608.62   4109.53    479.66 o
  -3   6  11    101.27   -751.90    388.91 <
  -2   6  11   2545.15   2268.67    388.91 o
  -1   6  11   5768.33   5781.86    505.59 o
   0   6  11    279.03    674.12    375.95 <
   1   6  11   3219.97   3318.74    531.52 o
   2   6  11   4659.64   4900.32    583.37 o
   3   6  11   7720.06   7350.48    674.12 o
   4   6  11    143.11   -764.86    648.19 <
   5   6  11    109.57   -803.76    738.94 <
   6   6  11     50.03    375.95    661.15 <
  -7   7  11   8416.56   8983.92   1114.89 o
  -6   7  11   2584.11   3772.47    894.50 o
  -5   7  11   7575.63   8283.88   1101.92 o
  -4   7  11     70.51  -1166.74    842.65 <
  -3   7  11   8272.82  11641.50   1374.16 o
  -2   7  11   1965.35   1659.37    842.65 <
  -1   7  11   1088.61   1827.90    842.65 <
   0   7  11   5824.72   6598.58   1088.96 o
   1   7  11    902.79   1192.67    790.79 <
   2   7  11  10426.70  11330.40   1283.42 o
   3   7  11   1814.59   1101.92    803.76 <
 -12   0  12    486.32   1542.69    907.47 <
 -11   0  12   2355.34   1672.33    816.72 <
 -10   0  12   3898.93   3590.98    881.54 o
  -9   0  12  37760.20  36869.10   2294.59 o
  -8   0  12  81092.90  78029.20   2566.83 o
  -7   0  12   1281.07   1088.96    298.17 o
  -6   0  12   1512.39   1218.60    311.13 o
  -5   0  12  95064.50  92172.70   2968.71 o
  -4   0  12  43475.90  41095.30   1503.80 o
  -3   0  12  23230.90  23373.80   1024.14 o
  -2   0  12    352.48    479.66    324.10 <
  -1   0  12   1967.72   1957.54    388.91 o
   0   0  12 122455.00 119980.00   3850.25 o
   1   0  12  16102.90  15725.10    842.65 o
   2   0  12    893.92    738.94    388.91 <
   3   0  12   7629.78   7298.63    635.23 o
   4   0  12   9142.11   9048.74    725.97 o
   5   0  12  34990.80  37659.90   1620.48 o
   6   0  12    492.71    -77.78    505.59 <
   7   0  12   8612.44   7531.97   1153.78 o
   8   0  12  10882.50   9074.67   1270.45 o
 -12   1  12  21818.40  17812.30   1672.33 o
 -11   1  12   8464.54   6987.50   1140.82 o
 -10   1  12   6357.75   9061.71   1140.82 o
  -9   1  12   1932.12    596.34    687.08 <
  -7   1  12   5357.87   4952.18    388.91 o
  -6   1  12     88.30    -25.93    272.24 <
  -5   1  12  18674.40  19160.50    700.05 o
  -4   1  12   1538.91   1672.33    259.28 o
  -3   1  12  12991.40  13262.00    505.59 o
  -2   1  12  12299.90  11874.90    479.66 o
  -1   1  12  15191.00  15426.90    661.15 o
   0   1  12   4368.95   3811.36    375.95 o
   1   1  12    355.83    738.94    298.17 <
   2   1  12    143.46    272.24    311.13 <
   3   1  12  31458.90  30711.30   1101.92 o
   4   1  12  19994.30  19316.10    855.61 o
   5   1  12    470.36    674.12    466.70 <
   6   1  12   2433.10   2463.12    583.37 o
   7   1  12   7543.27   7700.50    635.23 o
   8   1  12  17878.30  18797.50   1166.74 o
 -12   2  12   5016.70   4926.25    570.41 o
 -11   2  12     79.88    272.24    544.48 <
 -10   2  12   1286.84   1477.87    544.48 <
  -9   2  12  13039.90  13145.30    920.43 o
  -8   2  12   3956.61   3331.70    557.44 o
  -7   2  12   4420.40   4096.56    557.44 o
  -6   2  12   1695.54   1944.57    388.91 o
  -5   2  12   4617.93   4355.84    337.06 o
  -4   2  12  28049.10  28014.80    803.76 o
  -3   2  12   2412.67   2761.29    259.28 o
  -2   2  12    289.62    324.10    207.42 <
  -1   2  12   9425.73   9593.22    401.88 o
   0   2  12   5182.91   5133.67    362.99 o
   1   2  12   9737.68   8659.83    466.70 o
   2   2  12    251.28      0.00    272.24 <
   3   2  12     30.04   -194.46    298.17 <
   4   2  12   8921.34   9696.93    635.23 o
   5   2  12   2121.10   1931.61    427.81 o
   6   2  12     99.51   -194.46    362.99 <
   7   2  12      1.66   -518.55    388.91 <
 -12   3  12   1293.30   1114.89    738.94 <
 -11   3  12   3091.62   3565.05    531.52 o
 -10   3  12  10395.00   8530.19    816.72 o
  -9   3  12    535.45    350.02    492.63 <
  -8   3  12    479.15      0.00    466.70 <
  -7   3  12   1153.68   2385.34    505.59 o
  -6   3  12   4142.56   4576.23    518.55 o
  -5   3  12   9344.53   9204.31    440.77 o
  -4   3  12    152.91    -25.93    285.20 <
  -3   3  12  12141.90  12626.80    596.34 o
  -2   3  12   8285.07   8219.06    427.81 o
  -1   3  12   1888.53   1698.26    285.20 o
   0   3  12      8.91    401.88    220.38 <
   1   3  12     83.30   -129.64    324.10 <
   2   3  12   8665.22   9450.62    751.90 o
   3   3  12   3293.94   2852.04    557.44 o
   4   3  12    406.18     90.75    375.95 <
   5   3  12   7660.13   6961.57    596.34 o
   6   3  12    414.71     25.93    427.81 <
   7   3  12    705.55    648.19    570.41 <
 -11   4  12    241.38    -12.96    479.66 <
 -10   4  12    104.86    -25.93    388.91 <
  -9   4  12   6865.28   5509.62    687.08 o
  -8   4  12  21669.50  22816.30   1179.71 o
  -7   4  12   4596.11   4913.29    609.30 o
  -6   4  12   1241.21   1179.71    453.73 <
  -5   4  12  17092.00  18006.70    907.47 o
  -4   4  12   4438.71   5159.60    518.55 o
  -3   4  12   3109.39   3824.32    479.66 o
  -2   4  12   3280.49   3668.76    466.70 o
  -1   4  12    191.58    -51.86    298.17 <
   0   4  12  35202.80  37024.60   1231.56 o
   1   4  12    315.27    246.31    414.84 <
   2   4  12   2422.70   1698.26    492.63 o
   3   4  12    146.32   -350.02    388.91 <
   4   4  12   1997.28   2087.17    440.77 o
   5   4  12  12541.10  13326.80    751.90 o
   6   4  12    872.54    700.05    414.84 <
   7   4  12   5173.09   4913.29    700.05 o
 -10   5  12   1646.41   2022.35    596.34 o
  -9   5  12    219.49    350.02    440.77 <
  -8   5  12   8838.47   8374.62    596.34 o
  -7   5  12   8898.46   8595.01    751.90 o
  -6   5  12   3881.00   3500.23    544.48 o
  -5   5  12   8254.33   8815.39    713.01 o
  -4   5  12   1065.10    790.79    388.91 <
  -3   5  12   8611.53   8672.79    648.19 o
  -2   5  12    734.51    700.05    414.84 <
  -1   5  12  18440.30  18473.40    933.39 o
   0   5  12   3092.80   3629.87    492.63 o
   1   5  12   4871.34   5068.85    479.66 o
   2   5  12     41.54    233.35    350.02 <
   3   5  12  14192.00  16956.70    803.76 o
   4   5  12   7238.42   7130.10    596.34 o
   5   5  12     45.65    259.28    518.55 <
   6   5  12    208.45   -414.84    531.52 <
  -9   6  12  18240.00  21857.00   1646.40 o
  -8   6  12   3922.28   3046.50    557.44 o
  -7   6  12   7721.21   7869.03    713.01 o
  -6   6  12    642.03    207.42    492.63 <
  -5   6  12   8606.18   7674.58    920.43 o
  -4   6  12  39798.10  42638.00   2320.52 o
  -3   6  12    863.27   -362.99    583.37 <
  -2   6  12    615.42   -233.35    570.41 <
  -1   6  12  15664.00  16827.00   1218.60 o
   0   6  12   6963.67   9035.78    713.01 o
   1   6  12  13316.80  14532.40    881.54 o
   2   6  12      3.60    531.52    453.73 <
   3   6  12     37.56    -64.82    609.30 <
   4   6  12  19888.20  18979.00   1451.95 o
   5   6  12   1491.96    388.91    700.05 <
 -11   1  13   8217.14   7933.85   1166.74 o
 -10   1  13    689.69    674.12    777.83 <
  -9   1  13    148.24   -103.71    738.94 <
  -8   1  13    129.29    207.42    350.02 <
  -7   1  13   1046.60   1076.00    311.13 o
  -6   1  13  23231.10  22271.80    777.83 o
  -5   1  13   3582.06   3552.08    337.06 o
  -4   1  13   7289.17   7039.35    414.84 o
  -3   1  13   5079.82   4991.07    388.91 o
  -2   1  13   4083.95   4018.78    375.95 o
  -1   1  13  17110.00  16541.80    700.05 o
   0   1  13   1914.37   2126.07    362.99 o
   1   1  13   7501.21   6831.93    505.59 o
   2   1  13  15495.00  15025.10    738.94 o
   3   1  13  16016.40  16515.90    790.79 o
   4   1  13     64.11    -38.89    362.99 <
   5   1  13    817.43    894.50    401.88 <
   6   1  13     37.99    -51.86    570.41 <
   7   1  13   6256.14   7402.34    803.76 o
 -11   2  13     15.20    -51.86    596.34 <
 -10   2  13   6605.75   5379.98    738.94 o
  -9   2  13  64646.60  63328.20   2424.23 o
  -8   2  13    385.43    803.76    505.59 <
  -7   2  13   1122.15    479.66    324.10 <
  -6   2  13  13627.80  13210.10    803.76 o
  -5   2  13  12702.20  12899.00    583.37 o
  -4   2  13  32867.40  34030.00    946.36 o
  -3   2  13   1217.09    803.76    246.31 o
  -2   2  13   4805.88   5133.67    337.06 o
  -1   2  13  35362.40  35520.80    907.47 o
   0   2  13   8782.05   9243.20    427.81 o
   1   2  13   1497.46    790.79    311.13 <
   2   2  13   1042.99   1218.60    337.06 o
   3   2  13   1451.92   1374.16    350.02 o
   4   2  13  16826.90  17734.50    751.90 o
   5   2  13     32.68   -103.71    440.77 <
   6   2  13  21620.40  24877.60   1283.42 o
 -12   3  13   3409.20   4135.46    933.39 o
 -11   3  13   8109.18   6300.41    816.72 o
 -10   3  13   9237.26   7130.10    803.76 o
  -9   3  13    571.43    687.08    557.44 <
  -8   3  13   1068.07    803.76    505.59 <
  -7   3  13   1120.71    570.41    479.66 <
  -6   3  13  37601.00  40745.30   1607.51 o
  -5   3  13  12654.40  13430.50    816.72 o
  -4   3  13    523.55    842.65    414.84 <
  -3   3  13   4049.04   3824.32    414.84 o
  -2   3  13  27936.00  28442.60   1024.14 o
  -1   3  13  37258.20  39176.60   1296.38 o
   0   3  13   4057.13   4148.42    453.73 o
   1   3  13     18.60   -194.46    362.99 <
   2   3  13  22369.90  22920.00    959.32 o
   3   3  13  34290.40  39021.10   1672.33 o
   4   3  13   4900.98   4394.73    648.19 o
   5   3  13    913.47    687.08    440.77 <
   6   3  13   3082.10   3344.66    674.12 o
 -10   4  13  14129.70  12912.00    985.25 o
  -9   4  13   6547.20   7324.55    764.86 o
  -8   4  13  11570.10  11174.80    881.54 o
  -7   4  13    245.37    337.06    479.66 <
  -6   4  13   1995.11   2359.41    427.81 o
  -5   4  13  32839.20  34159.60   1413.06 o
  -4   4  13   1610.54   1283.42    453.73 <
  -3   4  13     16.50    181.49    375.95 <
  -2   4  13   2106.26   2346.45    388.91 o
  -1   4  13   1093.55   1503.80    375.95 o
   0   4  13   9119.00  10319.20    622.26 o
   1   4  13    149.92    233.35    375.95 <
   2   4  13   7023.55   6663.40    700.05 o
   3   4  13   2546.78   1309.35    570.41 <
   4   4  13    104.86   -401.88    440.77 <
   5   4  13    158.95     38.89    531.52 <
   6   4  13   1357.75    259.28    596.34 <
 -10   5  13   5062.86   4796.61    725.97 o
  -9   5  13    856.28    700.05    557.44 <
  -8   5  13    246.16    -51.86    518.55 <
  -7   5  13   9310.89   7687.54    725.97 o
  -6   5  13    113.28   -479.66    492.63 <
  -5   5  13   2473.99   1335.27    388.91 o
  -4   5  13  15080.70  14312.00    842.65 o
  -3   5  13    283.42    -38.89    414.84 <
  -2   5  13  12139.70  12989.70    803.76 o
  -1   5  13   5324.95   4965.14    479.66 o
   0   5  13    768.87   1153.78    440.77 <
   1   5  13  17432.70  19419.80   1037.10 o
   2   5  13    197.44    466.70    401.88 <
   3   5  13   1394.40    518.55    518.55 <
   4   5  13  11691.30   9748.79    855.61 o
   5   5  13    130.89   -388.91    596.34 <
  -8   6  13   1657.18   -518.55    855.61 <
  -7   6  13   6463.48   9113.56   1088.96 o
  -6   6  13     33.42   -401.88    635.23 <
  -5   6  13    154.19   -233.35    674.12 <
  -4   6  13    488.21     77.78    635.23 <
  -3   6  13   3809.07   3941.00    777.83 o
  -2   6  13   3675.34   3176.13    713.01 o
  -1   6  13   4144.40   3539.12    738.94 o
   0   6  13   1104.49   1996.43    661.15 o
   1   6  13    678.09   -142.60    622.26 <
   2   6  13    789.18   1024.14    713.01 <
   3   6  13    228.61   -518.55    803.76 <
   4   6  13   5156.74   4174.35    881.54 o
 -11   0  14    566.97   1568.62    881.54 <
 -10   0  14  36268.20  35287.50   2333.49 o
  -9   0  14   3525.11   3759.51    894.50 o
  -8   0  14   2300.85   1685.30    440.77 o
  -7   0  14    168.87    350.02    362.99 <
  -6   0  14    883.74   1101.92    388.91 <
  -5   0  14  31028.90  31255.80   1283.42 o
  -4   0  14   2379.95   1801.97    414.84 o
  -3   0  14  33700.60  33887.40   1400.09 o
  -2   0  14   4148.31   3240.95    479.66 o
  -1   0  14    151.82    751.90    401.88 <
   0   0  14   2553.42   2424.23    479.66 o
   1   0  14  11274.00  11421.10    803.76 o
   2   0  14  33235.70  35935.70   1568.62 o
   3   0  14   1925.68    544.48    492.63 <
   4   0  14    254.84   1400.09    557.44 <
   5   0  14  29351.70  31774.30   1516.77 o
   6   0  14   6861.52   6391.16    777.83 o
 -11   1  14  12485.10  10267.30    959.32 o
 -10   1  14  12786.40  13326.80   1451.95 o
  -9   1  14   2254.64    116.67    790.79 <
  -8   1  14    136.32    -77.78    414.84 <
  -7   1  14  38815.50  36350.50   1101.92 o
  -6   1  14  29624.90  29479.70    946.36 o
  -5   1  14    968.66   1153.78    285.20 o
  -4   1  14   4080.76   4044.71    362.99 o
  -3   1  14   8016.71   8283.88    492.63 o
  -2   1  14  43978.10  44867.80   1387.13 o
  -1   1  14  18898.50  20495.80    829.68 o
   0   1  14   2651.21   2190.88    388.91 o
   1   1  14   8499.59   7609.76    544.48 o
   2   1  14  19250.50  19069.80    855.61 o
   3   1  14   4825.60   4809.57    505.59 o
   4   1  14    706.65    985.25    440.77 <
   5   1  14   1272.34   1866.79    466.70 o
   6   1  14   3576.75   4602.15    725.97 o
 -10   2  14    868.71    116.67    583.37 <
  -9   2  14   3468.23   3668.76    661.15 o
  -8   2  14    608.91    687.08    531.52 <
  -7   2  14   1724.62   2048.28    362.99 o
  -6   2  14   2335.16   2074.21    492.63 o
  -5   2  14     22.16    -77.78    246.31 <
  -4   2  14    171.98    -12.96    259.28 <
  -3   2  14   1207.78   1529.73    298.17 o
  -2   2  14   4113.26   4303.99    388.91 o
  -1   2  14    384.69    311.13    285.20 <
   0   2  14    341.78    583.37    298.17 <
   1   2  14   7864.13   7791.25    505.59 o
   2   2  14   1282.70    855.61    350.02 <
   3   2  14   1988.83   2437.20    414.84 o
   4   2  14    909.27    985.25    388.91 <
   5   2  14    931.76    881.54    388.91 <
 -10   3  14      2.18   -233.35    622.26 <
  -9   3  14    328.14  -1050.07    648.19 <
  -8   3  14  11310.30  11252.60    894.50 o
  -7   3  14   3392.69   2307.56    596.34 o
  -6   3  14    121.44   -181.49    453.73 <
  -5   3  14   6398.90   6793.04    635.23 o
  -4   3  14     48.23    -25.93    350.02 <
  -3   3  14   2368.59   2865.00    414.84 o
  -2   3  14    580.53    505.59    362.99 <
  -1   3  14   2050.12   1840.86    401.88 o
   0   3  14  15856.50  16425.20    777.83 o
   1   3  14    413.95   1114.89    414.84 <
   2   3  14   1106.91    544.48    427.81 <
   3   3  14   2212.96   2074.21    492.63 o
   4   3  14    990.28   1516.77    635.23 <
   5   3  14   3152.12   3215.03    700.05 o
  -9   4  14   1160.72    700.05    622.26 <
  -8   4  14   3098.90   2579.80    609.30 o
  -7   4  14    298.99    350.02    479.66 <
  -6   4  14    650.61     77.78    337.06 <
  -5   4  14  14507.40  14960.20    894.50 o
  -4   4  14   1382.18   1646.40    492.63 o
  -3   4  14  14348.10  15802.90    751.90 o
  -2   4  14   2286.46   1892.72    401.88 o
  -1   4  14   3741.80   3746.54    466.70 o
   0   4  14    178.55    -38.89    388.91 <
   1   4  14   4129.29   4679.94    518.55 o
   2   4  14   8874.54  10695.10    700.05 o
   3   4  14   4433.87   5042.92    713.01 o
   4   4  14   1077.35   1568.62    635.23 <
  -9   5  14    431.59     51.86    570.41 <
  -8   5  14    398.61    -64.82    596.34 <
  -7   5  14  13398.00  13625.00    959.32 o
  -6   5  14  17325.20  21921.80   1179.71 o
  -5   5  14   1348.83    972.29    362.99 <
  -4   5  14    450.72   -233.35    466.70 <
  -3   5  14   9367.69   9424.69    738.94 o
  -2   5  14  25505.70  27042.50   1037.10 o
  -1   5  14   2881.59   3357.63    466.70 o
   0   5  14    381.75    155.57    388.91 <
   1   5  14    878.46    738.94    531.52 <
   2   5  14  14782.40  14752.80    985.25 o
   3   5  14   6651.74   7052.31    764.86 o
   4   5  14   1355.14    635.23    583.37 <
  -6   6  14   9519.55   9009.85   1088.96 o
  -5   6  14    110.91   -661.15    764.86 <
  -4   6  14   1156.05    544.48    492.63 <
  -3   6  14   1906.80    427.81    700.05 <
  -2   6  14   5074.36   4887.36    855.61 o
  -1   6  14   3126.20   2527.94    751.90 o
   0   6  14   1038.18   1698.26    713.01 <
   1   6  14  16502.60  14934.30   1296.38 o
   2   6  14   1363.91    933.39    738.94 <
 -10   1  15   3220.90   2852.04    713.01 o
  -9   1  15   7657.38   4122.49   1088.96 o
  -8   1  15   8259.30   7376.41    674.12 o
  -7   1  15  10521.40  10721.10    725.97 o
  -6   1  15    168.33    311.13    285.20 <
  -5   1  15    684.17    414.84    285.20 <
  -4   1  15   2120.46   1516.77    324.10 o
  -3   1  15   5078.73   4874.39    427.81 o
  -2   1  15  11148.10  11952.60    635.23 o
  -1   1  15   7759.92   7143.06    531.52 o
   0   1  15    116.36    401.88    362.99 <
   1   1  15   1146.71   1776.04    440.77 o
   2   1  15    106.81      0.00    388.91 <
   3   1  15    656.14    142.60    414.84 <
   4   1  15   6587.43   8154.24    661.15 o
   5   1  15    661.48   1503.80    803.76 <
  -9   2  15   2504.51   2100.14    648.19 o
  -8   2  15   9373.65  11097.00    907.47 o
  -7   2  15  11306.70  11900.80    661.15 o
  -6   2  15   6961.91   8115.35    557.44 o
  -5   2  15   1877.99    894.50    285.20 o
  -4   2  15  49230.10  50701.50   1322.31 o
  -3   2  15   3304.07   4679.94    388.91 o
  -2   2  15   1626.02   1711.22    337.06 o
  -1   2  15    533.57    103.71    324.10 <
   0   2  15   7271.71   7078.24    492.63 o
   1   2  15  47624.50  50377.40   1413.06 o
   2   2  15    131.33     51.86    375.95 <
   3   2  15    443.45   1050.07    401.88 <
   4   2  15   8751.03   8996.89    596.34 o
  -9   3  15      6.32   -687.08    648.19 <
  -8   3  15  12293.40  13469.40    985.25 o
  -7   3  15  22389.90  23308.90   1024.14 o
  -6   3  15   6561.33   7609.76    725.97 o
  -5   3  15     48.15    103.71    375.95 <
  -4   3  15     25.50   -246.31    388.91 <
  -3   3  15  15800.70  13560.10    894.50 o
  -2   3  15  11288.30  11408.20    674.12 o
  -1   3  15   2863.17   2968.71    479.66 o
   0   3  15    898.83   1529.73    440.77 o
   1   3  15   1440.97   1050.07    427.81 <
   2   3  15   3539.09   3240.95    531.52 o
   3   3  15    152.41    414.84    466.70 <
  -8   4  15  14019.70  14701.00   1050.07 o
  -7   4  15    616.32   1127.85    583.37 <
  -6   4  15   3043.63   2709.44    427.81 o
  -5   4  15   2943.84   2411.27    544.48 o
  -4   4  15   7745.62   8698.72    596.34 o
  -3   4  15  23618.70  26368.40   1037.10 o
  -2   4  15    408.84    751.90    414.84 <
  -1   4  15   2519.68   2424.23    466.70 o
   0   4  15  20020.40  21208.80    946.36 o
   1   4  15   6814.48   7000.46    622.26 o
   2   4  15   8006.22   7687.54    816.72 o
   3   4  15   1564.16   1218.60    635.23 <
  -7   5  15   2294.35   2372.38    648.19 o
  -6   5  15   4964.17   4796.61    713.01 o
  -5   5  15    148.62   -674.12    544.48 <
  -4   5  15   5767.35   5185.52    648.19 o
  -3   5  15    396.47     64.82    401.88 <
  -2   5  15    340.59     77.78    518.55 <
  -1   5  15   6379.89   6352.27    700.05 o
   0   5  15    265.27     38.89    544.48 <
   1   5  15     23.78   -414.84    557.44 <
   2   5  15   1137.29    881.54    570.41 <
  -4   6  15   1731.44    311.13    725.97 <
  -3   6  15    123.31   -687.08    738.94 <
  -2   6  15   1403.49    998.21    713.01 <
  -1   6  15   2957.03   3487.27    829.68 o
   0   6  15    210.28   1892.72    738.94 <
  -8   0  16  40765.80  44245.50   2748.33 o
  -7   0  16     19.93    207.42    725.97 <
  -6   0  16   1137.19    751.90    414.84 <
  -5   0  16  36770.80  34535.60   1426.02 o
  -4   0  16  16427.00  16814.10    920.43 o
  -3   0  16  11847.60  11019.20    777.83 o
  -2   0  16     23.19   -492.63    440.77 <
  -1   0  16    593.89    285.20    479.66 <
   0   0  16  44456.10  48653.20   1944.57 o
   1   0  16   3626.52   4550.30    661.15 o
   2   0  16    580.59    259.28    557.44 <
   3   0  16   2103.95   1983.46    622.26 o
  -8   1  16   4086.16   3383.55    946.36 o
  -7   1  16    862.79    751.90    453.73 <
  -6   1  16    330.45   -246.31    440.77 <
  -5   1  16  11880.00  11589.60    622.26 o
  -4   1  16     29.98     25.93    350.02 <
  -3   1  16   4765.09   4174.35    505.59 o
  -2   1  16   8387.10   6870.82    531.52 o
  -1   1  16   9471.31  10176.60    648.19 o
   0   1  16   3733.44   3578.01    492.63 o
   1   1  16     42.83   -427.81    414.84 <
   2   1  16     52.25   -324.10    427.81 <
   3   1  16  18199.70  18771.60   1114.89 o
  -8   2  16   2161.81   1957.54    479.66 o
  -7   2  16   4391.34   4265.09    492.63 o
  -6   2  16   1236.56   1400.09    401.88 o
  -5   2  16   3934.52   3305.77    466.70 o
  -4   2  16  10239.00   9645.08    635.23 o
  -3   2  16    407.21    583.37    337.06 <
  -2   2  16   1130.30   1140.82    375.95 o
  -1   2  16   4512.89   4641.04    440.77 o
   0   2  16   2336.71   2657.58    401.88 o
   1   2  16   2942.70   3163.17    440.77 o
   2   2  16     22.96    155.57    427.81 <
   3   2  16    170.35    103.71    751.90 <
  -7   3  16    763.06    777.83    350.02 <
  -6   3  16   2673.55   3357.63    466.70 o
  -5   3  16   5226.14   5237.38    531.52 o
  -4   3  16     36.95   -298.17    427.81 <
  -3   3  16   5243.23   5133.67    531.52 o
  -2   3  16   3670.58   2800.18    492.63 o
  -1   3  16    463.39    324.10    427.81 <
   0   3  16     91.70    324.10    440.77 <
   1   3  16     50.05    155.57    440.77 <
   2   3  16   4182.35   3046.50   1037.10 <
  -6   4  16   1457.18   1490.84    388.91 o
  -5   4  16   9950.18   8970.96    635.23 o
  -4   4  16   2969.28   2800.18    479.66 o
  -3   4  16   1601.73   2216.81    466.70 o
  -2   4  16   2513.90   3292.81    518.55 o
  -1   4  16    441.00    609.30    596.34 <
   0   4  16  15378.50  17099.30   1101.92 o
   1   4  16    388.18    427.81    920.43 <
  -5   5  16   6145.24   6067.06    713.01 o
  -4   5  16    182.67   -764.86    557.44 <
  -3   5  16   3204.36   3124.28    596.34 o
  -2   5  16    466.45    362.99    544.48 <
  -1   5  16  11134.60  12043.40    920.43 o
  -6   1  17  16314.70  14960.20    907.47 o
  -5   1  17   3021.45   3098.35    570.41 o
  -4   1  17   3326.25   2333.49    414.84 o
  -3   1  17   4309.48   3603.94    453.73 o
  -2   1  17   2767.58   2631.65    453.73 o
  -1   1  17   7102.00   6261.52    570.41 o
   0   1  17   1657.50   2087.17    453.73 o
   1   1  17   4050.88   4083.60    596.34 o
   2   1  17   7933.74   7298.63   1076.00 o
  -7   2  17   1229.26   1516.77    596.34 <
  -6   2  17   4142.67   3176.13    570.41 o
  -5   2  17   4515.29   4809.57    544.48 o
  -4   2  17  13029.30  14286.10    777.83 o
  -3   2  17   2152.39   1464.91    453.73 o
  -2   2  17   4524.09   4809.57    466.70 o
  -1   2  17  12287.30  11045.20    622.26 o
   0   2  17   2245.99   2216.81    479.66 o
   1   2  17   1823.22    751.90    700.05 <
   2   2  17    908.33    103.71    725.97 <
  -7   3  17   1785.34   1607.51    648.19 <
  -6   3  17  20487.70  22336.60   1555.66 o
  -5   3  17   8520.87   8698.72    777.83 o
  -4   3  17     30.24   -518.55    466.70 <
  -3   3  17   2147.52   2424.23    505.59 o
  -2   3  17  14788.40  16023.30    842.65 o
  -1   3  17  17658.80  18253.00   1114.89 o
  -3   0  18  19740.70  18201.20   1374.16 o
  -2   0  18    579.24    868.58    648.19 <
  -1   0  18     34.41     90.75    635.23 <
   0   0  18   2348.57   1451.95    751.90 <
  -5   1  18    739.02    803.76    583.37 <
  -4   1  18   1475.71    790.79    570.41 <
  -3   1  18   3482.40   2929.82    700.05 o
  -2   1  18  18699.90  16606.60    959.32 o
  -1   1  18   8579.85   8426.48    738.94 o
   0   1  18   1263.08    868.58    505.59 <
   1   1  18   1974.84   1179.71    777.83 <
  -5   2  18     18.52    220.38    609.30 <
  -4   2  18   1016.60    233.35    635.23 <
  -3   2  18    888.80   1503.80    700.05 <
  -2   2  18   1806.54   1490.84    713.01 <
   1   2  18   4846.93   3033.53    907.47 o
  -6   3  18    158.93   -324.10    635.23 <
  -3   1  19   2512.75   2450.16    751.90 o
  -2   1  19   4706.83   4615.12    894.50 o

loop_
 _twin_refln_datum_id
 _twin_refln_individual_id
 _twin_refln_index_h
 _twin_refln_index_k
 _twin_refln_index_l
 _twin_refln_F_squared_calc
 _twin_refln_F_squared_meas
 _twin_refln_F_squared_sigma
 _twin_refln_include_status
 ? ? ? ? ? ? ? ? ?
