# Supplementary material
Source: MDPI journal article supplement (https://www.mdpi.com/2073-8994/15/4/918)
Supplement: s1 [file s1 › Table S1.pdf]

**Table S1.** Atomic coordinates, structural occupancy factors, and equivalent isotropic and anisotropic displacement parameters ( $\text{\AA}^2$ ) for  $\text{BaBi}_{1.90}\text{Eu}_{0.10}\text{B}_4\text{O}_{10}$ ,  $\text{BaBi}_{1.70}\text{Eu}_{0.30}\text{B}_4\text{O}_{10}$  and  $\text{BaBi}_{1.60}\text{Eu}_{0.40}\text{B}_4\text{O}_{10}$ .

| <b>BaBi<sub>1.56</sub>Eu<sub>0.44</sub>B<sub>4</sub>O<sub>10</sub></b> |              |              |              |                                                   |            |
|------------------------------------------------------------------------|--------------|--------------|--------------|---------------------------------------------------|------------|
|                                                                        | <i>x</i>     | <i>y</i>     | <i>z</i>     | <i>U</i> <sub>iso</sub> */ <i>U</i> <sub>eq</sub> | Occ. (<1)  |
| Bi1                                                                    | 0.48200 (3)  | 0.17168 (4)  | 0.11937 (2)  | 0.01249 (9)                                       | 0.686 (9)  |
| Eu1'                                                                   | 0.48200 (3)  | 0.17168 (4)  | 0.11937 (2)  | 0.01249 (9)                                       | 0.314 (9)  |
| Bi2                                                                    | 0.73039 (3)  | 0.14451 (4)  | 0.37388 (2)  | 0.01211 (9)                                       | 0.888 (9)  |
| Eu2'                                                                   | 0.73039 (3)  | 0.14451 (4)  | 0.37388 (2)  | 0.01211 (9)                                       | 0.112 (9)  |
| Ba1                                                                    | 0.12748 (4)  | 0.09774 (6)  | −0.12555 (3) | 0.01208 (13)                                      |            |
| O1                                                                     | 0.3126 (5)   | 0.4445 (6)   | −0.1063 (4)  | 0.0140 (15)                                       |            |
| O2                                                                     | 0.2902 (5)   | 0.2822 (8)   | 0.2227 (5)   | 0.0260 (19)                                       |            |
| O3                                                                     | 0.5570 (5)   | −0.1368 (7)  | 0.0909 (4)   | 0.0197 (17)                                       |            |
| O4                                                                     | −0.1361 (5)  | −0.0053 (7)  | −0.2313 (4)  | 0.0147 (15)                                       |            |
| O5                                                                     | 0.7278 (5)   | 0.4943 (7)   | 0.4089 (4)   | 0.0182 (16)                                       |            |
| O6                                                                     | 0.4970 (5)   | 0.0788 (8)   | 0.2956 (4)   | 0.0206 (17)                                       |            |
| O7                                                                     | 0.1266 (5)   | −0.3287 (7)  | −0.1003 (4)  | 0.0142 (15)                                       |            |
| O8                                                                     | 0.7127 (4)   | 0.2188 (7)   | 0.2024 (4)   | 0.0126 (14)                                       |            |
| O9                                                                     | 0.9461 (5)   | 0.0766 (7)   | 0.3644 (4)   | 0.0162 (16)                                       |            |
| O10                                                                    | 0.0872 (5)   | 0.2282 (7)   | 0.0753 (4)   | 0.0180 (16)                                       |            |
| B1                                                                     | −0.1963 (8)  | −0.1257 (12) | −0.1565 (7)  | 0.015 (2)                                         |            |
| B2                                                                     | 0.0062 (7)   | 0.3856 (11)  | 0.1046 (6)   | 0.011 (2)                                         |            |
| B3                                                                     | 0.3906 (8)   | 0.1968 (13)  | 0.3336 (8)   | 0.024 (3)                                         |            |
| B4                                                                     | 0.2162 (7)   | 0.5920 (11)  | −0.1721 (6)  | 0.011 (2)                                         |            |
| <b>BaBi<sub>1.67</sub>Eu<sub>0.33</sub>B<sub>4</sub>O<sub>10</sub></b> |              |              |              |                                                   |            |
|                                                                        | <i>x</i>     | <i>y</i>     | <i>z</i>     | <i>U</i> <sub>iso</sub> */ <i>U</i> <sub>eq</sub> | Occ. (<1)  |
| Bi1                                                                    | 0.48344 (4)  | 0.17380 (6)  | 0.11882 (3)  | 0.01249 (13)                                      | 0.778 (12) |
| Eu1'                                                                   | 0.48344 (4)  | 0.17380 (6)  | 0.11882 (3)  | 0.01249 (13)                                      | 0.222 (12) |
| Bi2                                                                    | 0.72935 (4)  | 0.14643 (5)  | 0.37331 (3)  | 0.01268 (12)                                      | 0.888 (12) |
| Eu2'                                                                   | 0.72935 (4)  | 0.14643 (5)  | 0.37331 (3)  | 0.01268 (12)                                      | 0.112 (12) |
| Ba1                                                                    | 0.12756 (6)  | 0.09630 (9)  | −0.12464 (5) | 0.01277 (18)                                      |            |
| O1                                                                     | 0.3133 (6)   | 0.4411 (9)   | −0.1086 (5)  | 0.011 (2)                                         |            |
| O2                                                                     | 0.7102 (7)   | −0.2136 (10) | 0.2761 (6)   | 0.021 (2)                                         |            |
| O3                                                                     | 0.5592 (7)   | −0.1312 (10) | 0.0925 (5)   | 0.018 (2)                                         |            |
| O4                                                                     | −0.1336 (6)  | −0.0081 (10) | −0.2296 (5)  | 0.013 (2)                                         |            |
| O5                                                                     | 0.7278 (6)   | 0.4966 (10)  | 0.4062 (5)   | 0.016 (2)                                         |            |
| O6                                                                     | 0.4956 (7)   | 0.0861 (10)  | 0.2917 (6)   | 0.018 (2)                                         |            |
| O7                                                                     | 0.1269 (6)   | −0.3319 (9)  | −0.1009 (5)  | 0.014 (2)                                         |            |
| O8                                                                     | 0.7124 (6)   | 0.2221 (10)  | 0.2035 (5)   | 0.015 (2)                                         |            |
| O9                                                                     | 0.9459 (7)   | 0.0785 (10)  | 0.3650 (6)   | 0.018 (2)                                         |            |
| O10                                                                    | 0.0889 (7)   | 0.2297 (10)  | 0.0764 (5)   | 0.016 (2)                                         |            |
| B1                                                                     | −0.1984 (11) | −0.1256 (16) | −0.1573 (8)  | 0.010 (3)                                         |            |
| B2                                                                     | 0.0056 (11)  | 0.3872 (15)  | 0.1031 (9)   | 0.013 (3)                                         |            |
| B3                                                                     | 0.3882 (13)  | 0.2035 (18)  | 0.3296 (10)  | 0.020 (4)                                         |            |
| B4                                                                     | 0.2165 (10)  | 0.5881 (16)  | −0.1732 (9)  | 0.011 (3)                                         |            |
| <b>BaBi<sub>1.94</sub>Eu<sub>0.06</sub>B<sub>4</sub>O<sub>10</sub></b> |              |              |              |                                                   |            |

|      | $x$         | $y$          | $z$          | $U_{\text{iso}}^*/U_{\text{eq}}$ | Occ. (<1) |
|------|-------------|--------------|--------------|----------------------------------|-----------|
| Bi1  | 0.48415 (3) | 0.17456 (4)  | 0.11871 (3)  | 0.01290 (10)                     | 0.940 (7) |
| Eu1' | 0.48415 (3) | 0.17456 (4)  | 0.11871 (3)  | 0.01290 (10)                     | 0.060 (7) |
| Bi2  | 0.72879 (3) | 0.14693 (4)  | 0.37317 (3)  | 0.01319 (10)                     |           |
| Ba1  | 0.12785 (5) | 0.09550 (7)  | −0.12427 (4) | 0.01203 (14)                     |           |
| O1   | 0.3122 (5)  | 0.4391 (8)   | −0.1097 (5)  | 0.0132 (17)                      |           |
| O2   | 0.7105 (6)  | −0.2129 (8)  | 0.2754 (5)   | 0.0168 (18)                      |           |
| O3   | 0.5609 (6)  | −0.1293 (7)  | 0.0939 (5)   | 0.0139 (18)                      |           |
| O4   | −0.1337 (5) | −0.0058 (8)  | −0.2301 (5)  | 0.0123 (17)                      |           |
| O5   | 0.7277 (5)  | 0.4983 (8)   | 0.4062 (5)   | 0.0118 (17)                      |           |
| O6   | 0.4952 (6)  | 0.0894 (8)   | 0.2908 (5)   | 0.0144 (18)                      |           |
| O7   | 0.1263 (5)  | −0.3341 (8)  | −0.1006 (5)  | 0.0117 (17)                      |           |
| O8   | 0.7139 (6)  | 0.2235 (8)   | 0.2033 (5)   | 0.0133 (17)                      |           |
| O9   | 0.9446 (5)  | 0.0818 (8)   | 0.3643 (5)   | 0.0145 (18)                      |           |
| O10  | 0.0893 (5)  | 0.2326 (8)   | 0.0762 (5)   | 0.0140 (17)                      |           |
| B1   | −0.1951 (9) | −0.1289 (13) | −0.1571 (8)  | 0.012 (3)                        |           |
| B2   | 0.0055 (9)  | 0.3878 (13)  | 0.1055 (7)   | 0.0088 (16)*                     |           |
| B3   | 0.3887 (10) | 0.1971 (15)  | 0.3310 (9)   | 0.019 (3)                        |           |
| B4   | 0.2146 (9)  | 0.5869 (13)  | −0.1715 (7)  | 0.011 (2)                        |           |
