# Supplementary material
Source: MDPI journal article supplement (https://www.mdpi.com/2073-8994/15/4/918)
Supplement: s1 [file s1 › Table S2.pdf]

**Table S2.** Selected interatomic distances and bond valence values for BaBi<sub>1.90</sub>Eu<sub>0.10</sub>B<sub>4</sub>O<sub>10</sub>, BaBi<sub>1.70</sub>Eu<sub>0.30</sub>B<sub>4</sub>O<sub>10</sub> and BaBi<sub>1.60</sub>Eu<sub>0.40</sub>B<sub>4</sub>O<sub>10</sub>.

| <b>BaBi<sub>1.94</sub>Eu<sub>0.06</sub>B<sub>4</sub>O<sub>10</sub></b> |             |      |                       |             |      |
|------------------------------------------------------------------------|-------------|------|-----------------------|-------------|------|
| Bond                                                                   | Distance, Å | BV   | Bond                  | Distance, Å | BV   |
| Bi1—O3                                                                 | 2.138 (5)   | 0.89 | Bi2—O8                | 2.143 (6)   | 0.88 |
| Bi1—O6                                                                 | 2.189 (6)   | 0.77 | Bi2—O9                | 2.263 (6)   | 0.63 |
| Bi1—O8                                                                 | 2.367 (5)   | 0.48 | Bi2—O5                | 2.280 (5)   | 0.60 |
| Bi1—O5 <sup>iii</sup>                                                  | 2.392 (5)   | 0.45 | Bi2—O6                | 2.403 (5)   | 0.43 |
| Bi1—O3 <sup>ii</sup>                                                   | 2.600 (6)   | 0.25 | Bi2—O2                | 2.586 (5)   | 0.26 |
| Bi1—O2 <sup>i</sup>                                                    | 2.708 (7)   | 0.19 | Bi2—O7 <sup>i</sup>   | 2.893 (6)   | 0.12 |
| Bi1—O6 <sup>i</sup>                                                    | 2.866 (5)   | 0.12 | <Bi2—O> <sub>6</sub>  | 2.43        | 2.93 |
| <Bi1—O> <sub>7</sub>                                                   | 2.47        | 3.15 | B1—O4                 | 1.443 (12)  | 0.82 |
| Ba1—O10                                                                | 2.752 (6)   | 0.28 | B1—O10 <sup>vii</sup> | 1.462 (10)  | 0.78 |
| Ba1—O7                                                                 | 2.758 (5)   | 0.28 | B1—O5 <sup>iv</sup>   | 1.484 (12)  | 0.73 |
| Ba1—O9 <sup>iv</sup>                                                   | 2.763 (5)   | 0.27 | B1—O2 <sup>vi</sup>   | 1.515 (10)  | 0.68 |
| Ba1—O4                                                                 | 2.777 (5)   | 0.26 | <B1—O> <sub>4</sub>   | 1.48        | 3.01 |
| Ba1—O5 <sup>iii</sup>                                                  | 2.857 (5)   | 0.21 | B2—O9 <sup>i</sup>    | 1.360 (10)  | 1.03 |
| Ba1—O2 <sup>ii</sup>                                                   | 2.859 (7)   | 0.21 | B2—O7 <sup>vii</sup>  | 1.375 (11)  | 0.99 |
| Ba1—O1                                                                 | 2.867 (5)   | 0.21 | B2—O10                | 1.407 (11)  | 0.90 |
| Ba1—O8 <sup>ii</sup>                                                   | 2.899 (6)   | 0.19 | <B3—O> <sub>3</sub>   | 1.38        | 2.92 |
| <Ba1—O> <sub>8</sub>                                                   | 2.82        | 1.92 | B3—O6                 | 1.462 (13)  | 0.78 |
| B4—O4 <sup>ix</sup>                                                    | 1.444 (10)  | 0.82 | B3—O3 <sup>i</sup>    | 1.468 (11)  | 0.77 |
| B4—O1                                                                  | 1.460 (10)  | 0.78 | B3—O1 <sup>viii</sup> | 1.470 (13)  | 0.76 |
| B4—O7 <sup>x</sup>                                                     | 1.480 (12)  | 0.74 | B3—O2 <sup>i</sup>    | 1.586 (11)  | 0.56 |
| B4—O8 <sup>xi</sup>                                                    | 1.509 (11)  | 0.69 | <B3—O> <sub>4</sub>   | 1.50        | 2.87 |
| <B4—O> <sub>4</sub>                                                    | 1.47        | 3.03 |                       |             |      |
| <b>BaBi<sub>1.67</sub>Eu<sub>0.33</sub>B<sub>4</sub>O<sub>10</sub></b> |             |      |                       |             |      |
| Bond                                                                   | Distance, Å | BV   | Bond                  | Distance, Å | BV   |
| Bi1—O3                                                                 | 2.147 (6)   | 0.86 | Bi2—O8                | 2.137 (7)   | 0.89 |
| Bi1—O6                                                                 | 2.200 (7)   | 0.75 | Bi2—O5                | 2.275 (6)   | 0.61 |
| Bi1—O8                                                                 | 2.364 (6)   | 0.48 | Bi2—O9                | 2.277 (7)   | 0.61 |
| Bi1—O5 <sup>iii</sup>                                                  | 2.394 (6)   | 0.44 | Bi2—O6                | 2.411 (6)   | 0.42 |
| Bi1—O3 <sup>ii</sup>                                                   | 2.583 (7)   | 0.27 | Bi2—O2                | 2.586 (7)   | 0.26 |
| Bi1—O2 <sup>i</sup>                                                    | 2.694 (8)   | 0.20 | Bi2—O7 <sup>i</sup>   | 2.893 (6)   | 0.12 |
| Bi1—O6 <sup>i</sup>                                                    | 2.849 (7)   | 0.13 | <Bi2—O> <sub>6</sub>  | 2.43        | 2.91 |
| <Bi1—O> <sub>7</sub>                                                   | 2.46        | 3.12 | B1—O4                 | 1.439 (13)  | 0.83 |
| Ba1—O10                                                                | 2.750 (7)   | 0.28 | B1—O5 <sup>iv</sup>   | 1.459 (13)  | 0.79 |
| Ba1—O7                                                                 | 2.751 (6)   | 0.28 | B1—O10 <sup>vii</sup> | 1.488 (11)  | 0.73 |
| Ba1—O9 <sup>iv</sup>                                                   | 2.768 (7)   | 0.27 | B1—O2 <sup>vi</sup>   | 1.507 (12)  | 0.69 |
| Ba1—O4                                                                 | 2.781 (6)   | 0.26 | <B1—O> <sub>4</sub>   | 1.47        | 3.03 |
| Ba1—O2 <sup>ii</sup>                                                   | 2.865 (8)   | 0.21 | B2—O9 <sup>i</sup>    | 1.345 (12)  | 1.07 |
| Ba1—O5 <sup>iii</sup>                                                  | 2.866 (6)   | 0.21 | B2—O7 <sup>vii</sup>  | 1.392 (13)  | 0.94 |
| Ba1—O1                                                                 | 2.884 (6)   | 0.20 | B2—O10                | 1.403 (13)  | 0.91 |
| Ba1—O8 <sup>ii</sup>                                                   | 2.910 (7)   | 0.18 | <B2—O> <sub>3</sub>   | 1.38        | 2.93 |
| <Ba1—O> <sub>8</sub>                                                   | 2.82        | 1.90 | B3—O3 <sup>i</sup>    | 1.454 (13)  | 0.80 |

|                                                                        |             |           |                       |             |           |
|------------------------------------------------------------------------|-------------|-----------|-----------------------|-------------|-----------|
| B4—O4 <sup>ix</sup>                                                    | 1.451 (11)  | 0.80      | B3—O6                 | 1.486 (15)  | 0.73      |
| B4—O1                                                                  | 1.469 (11)  | 0.77      | B3—O1 <sup>viii</sup> | 1.512 (15)  | 0.68      |
| B4—O8 <sup>xi</sup>                                                    | 1.503 (13)  | 0.70      | B3—O2 <sup>i</sup>    | 1.563 (13)  | 0.59      |
| B4—O7 <sup>x</sup>                                                     | 1.505 (14)  | 0.69      | <B3—O> <sub>4</sub>   | 1.50        | 2.80      |
| <B4—O> <sub>4</sub>                                                    | 1.48        | 2.96      |                       |             |           |
| <b>BaBi<sub>1.57</sub>Eu<sub>0.43</sub>B<sub>4</sub>O<sub>10</sub></b> |             |           |                       |             |           |
| Bond                                                                   | Distance, Å | <i>BV</i> | Bond                  | Distance, Å | <i>BV</i> |
| Bi1—O3                                                                 | 2.174 (5)   | 0.80      | Bi2—O2 <sup>ii</sup>  | 2.596 (5)   | 0.26      |
| Bi1—O6                                                                 | 2.236 (5)   | 0.68      | Bi2—O5                | 2.280 (5)   | 0.60      |
| Bi1—O8                                                                 | 2.384 (4)   | 0.45      | Bi2—O6                | 2.414 (5)   | 0.42      |
| Bi1—O5 <sup>ii</sup>                                                   | 2.387 (5)   | 0.45      | Bi2—O7 <sup>iii</sup> | 2.877 (5)   | 0.12      |
| Bi1—O3 <sup>i</sup>                                                    | 2.559 (5)   | 0.28      | Bi2—O8                | 2.147 (5)   | 0.86      |
| Bi1—O2                                                                 | 2.660 (6)   | 0.21      | Bi2—O9                | 2.278 (5)   | 0.61      |
| Bi1—O6 <sup>iii</sup>                                                  | 2.800 (5)   | 0.15      | <Bi2—O> <sub>6</sub>  | 2.43        | 2.87      |
| <Bi1—O> <sub>7</sub>                                                   | 2.46        | 3.02      | B1—O4                 | 1.442 (10)  | 0.82      |
| Ba1—O10                                                                | 2.739 (5)   | 0.29      | B1—O10 <sup>vii</sup> | 1.485 (9)   | 0.73      |
| Ba1—O7                                                                 | 2.746 (4)   | 0.29      | B1—O5 <sup>v</sup>    | 1.495 (10)  | 0.71      |
| Ba1—O9 <sup>v</sup>                                                    | 2.775 (5)   | 0.27      | B1—O2 <sup>vii</sup>  | 1.503 (9)   | 0.70      |
| Ba1—O4                                                                 | 2.812 (4)   | 0.24      | <B1—O> <sub>4</sub>   | 1.48        | 2.97      |
| Ba1—O5 <sup>ii</sup>                                                   | 2.851 (5)   | 0.22      | B2—O9 <sup>iii</sup>  | 1.341 (8)   | 1.08      |
| Ba1—O2 <sup>iv</sup>                                                   | 2.872 (6)   | 0.20      | B2—O7 <sup>vii</sup>  | 1.397 (9)   | 0.93      |
| Ba1—O8 <sup>i</sup>                                                    | 2.890 (5)   | 0.19      | B2—O10                | 1.401 (9)   | 0.92      |
| Ba1—O1                                                                 | 2.894 (4)   | 0.19      | <B2—O> <sub>3</sub>   | 1.38        | 2.93      |
| <Ba1—O> <sub>8</sub>                                                   | 2.82        | 1.90      | B3—O3 <sup>iii</sup>  | 1.442 (10)  | 0.82      |
| B4—O4 <sup>ix</sup>                                                    | 1.438 (8)   | 0.83      | B3—O6                 | 1.482 (11)  | 0.74      |
| B4—O1                                                                  | 1.478 (8)   | 0.75      | B3—O1 <sup>viii</sup> | 1.505 (11)  | 0.69      |
| B4—O7 <sup>x</sup>                                                     | 1.498 (10)  | 0.71      | B3—O2                 | 1.623 (10)  | 0.50      |
| B4—O8 <sup>xi</sup>                                                    | 1.500 (9)   | 0.70      | <B3—O> <sub>4</sub>   | 1.51        | 2.76      |
| <B4—O> <sub>4</sub>                                                    | 1.48        | 2.99      |                       |             |           |
