# Supplementary material
Source: MDPI journal article supplement (https://www.mdpi.com/2073-8994/15/4/918)
Supplement: s1 [file s1 › Table S4.pdf]

**Table S4.** Chemical composition of BaBi<sub>1.90</sub>Eu<sub>0.10</sub>B<sub>4</sub>O<sub>10</sub> and BaBi<sub>1.60</sub>Eu<sub>0.40</sub>B<sub>4</sub>O<sub>10</sub> (wt.%).

| Constituent                    | Mean  | Range        | S.D. |
|--------------------------------|-------|--------------|------|
| $x = 0.40$                     |       |              |      |
| BaO                            | 21.06 | 20.33–21.53  | 0.49 |
| Bi <sub>2</sub> O <sub>3</sub> | 50.31 | 49.91–51.50  | 0.84 |
| Eu <sub>2</sub> O <sub>3</sub> | 9.46  | 8.81 – 10.73 | 0.71 |
| B <sub>2</sub> O <sub>3</sub>  | 19.39 | 18.15–20.95  | 0.96 |
| $x = 0.10$                     |       |              |      |
| BaO                            | 20.07 | 19.94–20.47  | 0.22 |
| Bi <sub>2</sub> O <sub>3</sub> | 58.96 | 58.49–59.37  | 0.31 |
| Eu <sub>2</sub> O <sub>3</sub> | 2.37  | 2.12–2.54    | 0.36 |
| B <sub>2</sub> O <sub>3</sub>  | 18.60 | 18.05–19.31  | 0.66 |
